# Supplementary material for: SNP discovery and genetic mapping using genotyping by sequencing of whole genome genomic DNA from a pea RIL population
Source: BMC Genomics. 2016 Feb 18;17:121. doi: 10.1186/s12864-016-2447-2 (PMC4758021; doi:10.1186/s12864-016-2447-2)
Supplement: Additional file 5: Table S4. — Mapping data and polymorphism in the 48 ‘Baccara’ x ‘PI180693’ RILs of a set of 64,263 SNP markers mapped to the seven linkage groups of the BP-WGGBS map. (XLSX 17036 kb) [file 12864_2016_2447_MOESM5_ESM.xlsx]

## Sheet: PsLGI
SnpName	Genetic Position (cM)	Two-point LOD of linkage to the closest marker in the framework map	marker of the framework map on Left side of the placed marker	marker of the framework map on Right side of the placed marker	left marker of the framework map that delimit an interval into which the placed marker lies with a LOD score of at least 3.0	right marker of the framework map that delimit an interval into which the placed marker lies with a LOD score of at least 3.0	χ2	BAP8_043	BAP8_130	BAP8_184	BAP8_066	BAP8_142	BAP8_172	BAP8_186	BAP8_243	BAP8_018	BAP8_070	BAP8_136	BAP8_198	BAP8_006	BAP8_051	BAP8_057	BAP8_060	BAP8_109	BAP8_129	BAP8_183	BAP8_195	BAP8_215	BAP8_024	BAP8_110	BAP8_131	BAP8_165	BAP8_197	BAP8_203	BAP8_056	BAP8_094	BAP8_099	BAP8_126	BAP8_004	BAP8_116	BAP8_166	BAP8_177	BAP8_202	BAP8_029	BAP8_037	BAP8_047	BAP8_082	BAP8_090	BAP8_104
Ps123971	0						0.169912	B	A	B	A	B	B	B	A	A	A	B	B	B	B	-	A	B	-	A	A	A	B	B	B	A	B	B	A	B	B	A	B	A	B	B	A	B	B	-	B	B	A
Ps116326	0	11.4	NA	Ps123971	NA	eSSR75-377	0.169912	B	A	B	A	B	B	B	A	A	A	B	B	B	B	A	-	B	A	A	A	A	B	B	B	A	B	B	-	B	B	A	B	-	B	B	A	B	B	A	B	-	A
Ps121185	0	11.7	Ps123971	eSSR75-377	NA	eSSR75-377	0.445766	B	A	B	A	B	B	B	A	A	A	B	B	-	B	A	A	B	A	A	A	A	B	-	B	A	B	B	A	B	B	A	B	A	B	B	A	B	B	-	B	-	A
Ps160312	0	10.5	NA	Ps123971	NA	eSSR75-377	0.516412	B	A	B	A	B	B	B	-	A	A	-	B	B	B	A	A	-	A	A	A	A	B	-	-	A	B	B	A	B	B	A	-	A	B	-	-	B	B	-	B	B	A
Ps143525	0	10.8	NA	Ps123971	NA	eSSR75-377	0.43488	B	A	B	A	B	B	B	A	A	A	B	B	B	B	A	A	B	A	A	A	A	-	B	B	-	-	B	A	B	-	A	B	-	B	B	A	-	B	A	B	B	A
Ps102378	0	12.6	NA	Ps123971	NA	eSSR75-377	0.376344	B	A	B	A	B	B	B	A	A	A	B	B	B	B	A	A	B	A	A	A	A	B	-	B	A	B	B	A	B	B	A	B	A	B	B	A	B	B	A	B	B	A
Ps142800	0	11.1	Ps123971	eSSR75-377	NA	eSSR75-377	0.274299	-	A	B	A	B	B	B	A	A	A	B	B	B	B	A	A	B	A	-	A	A	B	-	B	A	B	B	A	B	B	-	B	A	B	B	A	B	B	A	-	B	A
Ps106403	0	12	Ps123971	eSSR75-377	NA	eSSR75-377	0.456057	-	A	B	A	B	B	B	A	A	A	B	B	B	B	A	A	B	A	A	A	A	B	-	B	A	B	B	A	B	B	A	B	A	B	B	A	B	-	A	B	B	A
Ps133280	0	11.1	Ps123971	eSSR75-377	NA	eSSR75-377	0.537094	B	A	B	A	B	-	B	A	A	A	B	B	B	B	A	A	B	A	A	A	-	B	-	B	A	B	-	A	B	-	A	B	A	B	B	A	B	B	A	-	B	A
Ps118372	2.4	10.3	Ps123971	eSSR75-377	NA	eSSR75-377	0.445766	B	A	B	A	B	B	B	A	A	A	B	B	B	B	A	A	B	A	A	-	A	B	-	B	A	B	B	-	B	B	A	B	A	A	B	A	B	-	A	B	B	A
Ps103396	2.4	10.3	Ps123971	eSSR75-377	NA	eSSR75-377	0.654721	B	A	B	A	B	B	B	A	A	A	B	B	B	B	A	A	B	A	A	A	A	B	B	B	A	B	-	A	B	B	A	B	A	-	B	A	B	A	A	-	B	A
Ps153461	2.4	9.1	Ps123971	eSSR75-377	NA	eSSR75-377	0.42334	B	A	B	A	B	B	B	A	-	A	B	B	B	B	A	-	B	-	A	A	A	B	B	B	A	B	B	A	B	-	A	-	A	-	B	A	B	A	-	B	B	A
Ps162262	2.4	8.6	Ps123971	eSSR75-377	NA	eSSR75-377	0.869417	-	A	B	A	B	B	-	A	A	A	B	B	B	B	-	A	-	A	A	-	A	B	-	-	A	B	B	A	B	B	A	-	A	-	B	A	B	A	A	-	B	A
Ps156845	2.5	9.1	Ps123971	eSSR75-377	NA	eSSR75-377	0.87278	B	A	B	A	B	-	B	A	A	A	B	B	B	-	A	A	B	A	A	A	A	B	-	-	A	B	B	A	B	-	A	B	A	-	B	A	B	A	-	B	B	-
Ps112230	3.2	10.3	Ps123971	eSSR75-377	Ps123971	eSSR75-377	0.763025	B	A	B	A	B	-	B	A	A	A	B	B	B	B	A	A	B	A	A	A	A	B	B	B	-	B	B	A	B	B	A	B	A	A	B	A	B	A	A	B	B	A
Ps137642	3.2	9.1	Ps123971	eSSR75-377	Ps123971	eSSR75-377	0.639412	B	A	B	A	B	B	B	A	A	-	B	B	B	B	A	A	-	A	A	A	A	B	B	B	A	B	B	A	B	B	-	B	A	A	-	A	-	A	-	-	B	A
Ps113421	3.2	10.3	Ps123971	eSSR75-377	Ps123971	eSSR75-377	0.763025	B	A	B	-	B	B	B	A	A	A	B	B	B	B	A	A	B	A	A	A	A	B	-	-	A	B	B	A	B	B	A	B	A	A	B	A	B	A	A	-	B	A
Ps110209	3.2	10.3	Ps123971	eSSR75-377	Ps123971	eSSR75-377	0.763025	B	A	B	A	B	B	B	A	A	A	B	B	B	B	A	-	B	A	A	A	A	B	-	B	A	-	B	A	B	B	A	-	A	A	B	A	B	A	A	B	B	A
Ps109539	3.2	10	Ps123971	eSSR75-377	Ps123971	eSSR75-377	0.546494	B	A	B	A	B	B	B	A	A	A	B	B	B	B	A	A	-	-	A	A	A	B	B	B	-	B	B	A	B	B	A	B	A	A	B	A	B	A	A	-	B	A
Ps105900	3.2	10.9	Ps123971	eSSR75-377	Ps123971	eSSR75-377	0.654721	B	A	B	A	B	B	B	A	A	A	B	B	B	B	A	A	B	A	A	A	A	B	-	B	A	B	B	A	B	B	A	B	A	A	B	A	B	A	-	B	B	A
Ps100176	3.2	10.9	Ps123971	eSSR75-377	Ps123971	eSSR75-377	0.465803	B	A	B	A	B	B	B	A	A	A	B	B	B	B	A	A	B	A	A	A	A	B	B	B	A	B	B	-	B	B	A	B	A	A	B	A	B	A	A	B	B	A
Ps117560	3.2	10	Ps123971	eSSR75-377	Ps123971	eSSR75-377	0.285751	B	A	B	A	B	B	B	A	A	A	B	B	B	-	A	A	B	A	A	A	-	B	B	B	A	B	B	A	B	B	-	B	A	A	B	-	B	A	-	B	B	A
Ps124812	3.2	9.7	Ps123971	eSSR75-377	Ps123971	eSSR75-377	0.537094	B	A	B	A	B	B	B	A	-	A	-	B	B	B	-	A	B	A	A	A	A	B	-	-	A	B	B	A	B	B	A	B	A	A	B	A	B	A	-	B	B	A
Ps142058	3.2	9.4	Ps123971	eSSR75-377	Ps123971	eSSR75-377	0.639412	B	A	B	-	-	B	B	A	A	A	B	B	B	B	A	-	B	A	A	A	A	B	B	B	A	B	-	A	B	B	A	B	A	A	B	A	B	A	A	-	B	-
Ps134288	3.2	10	Ps123971	eSSR75-377	Ps123971	eSSR75-377	1	B	A	B	A	B	B	B	A	A	A	B	B	-	B	A	A	B	A	A	A	A	B	-	-	A	B	B	A	-	B	A	B	A	A	B	A	B	A	-	B	B	A
Ps118276	3.2	10	Ps123971	eSSR75-377	Ps123971	eSSR75-377	0.647315	B	A	B	A	B	-	B	A	A	A	B	B	B	B	A	A	B	-	A	-	A	B	-	B	A	B	B	A	B	B	A	B	A	A	B	A	B	A	A	-	B	A
Ps125696	3.2	9.7	Ps123971	eSSR75-377	Ps123971	eSSR75-377	0.757621	B	A	B	A	B	B	B	A	A	A	B	-	B	B	A	A	B	A	A	A	A	B	B	B	A	B	B	-	B	B	A	B	A	A	B	A	-	A	-	B	-	A
Ps109351	3.2	10	Ps123971	eSSR75-377	Ps123971	eSSR75-377	1	B	A	B	A	B	B	B	A	A	A	-	B	B	B	A	A	B	A	A	A	A	B	B	-	A	B	B	A	B	B	A	B	A	A	-	A	B	A	A	B	B	A
Ps115500	3.2	10	Ps123971	eSSR75-377	Ps123971	eSSR75-377	0.878794	B	A	B	A	B	B	B	A	A	A	B	-	B	B	A	A	B	A	A	A	A	B	B	B	A	-	B	A	B	B	-	B	A	A	B	A	B	A	A	B	-	A
Ps162871	3.2	8.6	Ps123971	eSSR75-377	Ps123971	eSSR75-377	0.738883	-	A	B	-	-	B	B	A	A	A	-	B	B	-	A	A	-	A	A	A	A	B	-	B	A	B	B	A	-	B	A	B	A	A	B	-	B	A	A	B	-	A
Ps105677	3.2	10.9	Ps123971	eSSR75-377	Ps123971	eSSR75-377	0.881497	B	A	-	A	B	B	B	A	A	A	B	B	-	B	A	A	B	A	A	A	A	B	-	B	A	B	B	A	B	B	A	B	A	A	B	A	B	A	A	B	B	A
Ps128135	3.3	9.7	Ps123971	eSSR75-377	Ps123971	eSSR75-377	0.354539	B	A	B	-	B	B	B	-	-	A	-	B	B	B	A	A	B	A	A	A	A	B	-	B	A	B	B	-	B	B	A	B	A	A	B	A	B	A	A	B	B	A
Ps122997	3.3	10	Ps123971	eSSR75-377	Ps123971	eSSR75-377	0.878794	-	A	B	A	B	B	B	A	A	A	B	B	-	B	A	A	B	A	A	A	A	B	-	-	A	B	B	A	B	B	A	B	A	A	B	A	B	A	A	-	B	A
Ps117258	3.3	10	Ps123971	eSSR75-377	Ps123971	eSSR75-377	0.878794	-	A	B	A	B	B	B	A	A	A	B	-	B	B	A	A	B	A	A	A	A	B	-	B	A	B	B	A	B	-	-	B	A	A	B	A	B	A	A	B	B	A
Ps124841	3.3	10	Ps123971	eSSR75-377	Ps123971	eSSR75-377	0.537094	-	A	-	A	B	B	B	A	A	A	B	B	B	-	A	A	B	A	A	A	-	B	B	B	A	B	B	A	B	B	A	B	A	A	B	-	B	A	-	B	B	A
Ps130878	3.3	9.7	Ps123971	eSSR75-377	Ps123971	eSSR75-377	0.757621	-	A	B	A	B	B	B	A	A	A	B	B	B	B	-	A	B	A	A	A	A	B	-	B	A	B	B	A	B	B	A	B	A	A	-	A	B	A	A	B	-	-
Ps138939	3.3	10	Ps123971	eSSR75-377	NA	eSSR75-377	0.639412	B	A	-	-	B	B	B	A	A	A	B	B	B	B	A	A	B	A	A	A	A	B	-	B	A	-	B	A	B	-	A	B	A	A	B	A	-	A	A	-	B	A
Ps110327	3.3	10.6	Ps123971	eSSR75-377	Ps123971	eSSR75-377	0.763025	B	A	B	A	B	B	-	A	A	A	B	B	B	-	A	A	B	A	A	A	A	B	B	B	A	B	B	A	B	B	A	B	A	A	B	A	B	A	A	B	B	A
Ps158608	3.3	8.9	Ps123971	eSSR75-377	Ps123971	eSSR75-377	1	B	A	B	-	B	B	B	A	A	A	B	B	B	B	A	A	B	A	A	A	A	B	-	B	A	-	B	A	-	-	A	-	-	A	B	A	B	A	-	B	-	A
Ps133713	3.3	9.7	Ps123971	eSSR75-377	Ps123971	eSSR75-377	0.757621	-	A	B	A	B	B	B	A	A	A	B	B	B	B	A	A	B	A	A	A	A	B	B	B	A	-	B	A	B	B	A	B	-	A	B	A	B	A	A	-	B	-
Ps103528	3.3	10.6	Ps123971	eSSR75-377	Ps123971	eSSR75-377	0.654721	B	A	B	A	B	B	B	A	A	A	B	B	B	B	A	A	B	A	A	A	A	B	-	B	A	B	B	A	B	-	A	B	A	A	B	-	B	A	A	B	B	A
Ps900172	3.8	21.7	Ps123971	eSSR75-377	Ps123971	eSSR75-377	0.768083	B	A	B	A	B	B	B	A	A	A	B	B	B	B	A	A	B	A	A	A	A	B	-	B	A	B	B	A	B	B	A	B	A	A	B	A	B	A	A	B	B	A
eSSR75-377	4.7						0.763025	B	B	-	A	B	B	B	A	A	A	B	B	B	-	A	A	B	A	A	A	A	B	-	B	A	B	B	A	B	B	A	B	A	A	B	A	B	A	A	B	B	A
Ps103981	4.7	12.3	Ps123971	eSSR75-377	Ps123971	eSSR338-224	0.654721	B	B	B	A	B	B	B	A	A	A	B	B	-	B	A	A	B	A	A	A	A	B	B	B	A	B	B	A	B	B	A	B	A	A	B	A	-	A	A	B	B	A
Ps112137	4.7	12.3	Ps123971	eSSR75-377	Ps123971	eSSR338-224	0.763025	-	B	B	A	B	B	B	A	A	A	B	B	B	B	A	A	B	A	A	A	A	B	-	B	A	B	B	A	-	B	A	B	A	A	B	A	B	A	A	B	-	A
Ps144750	4.7	10.8	Ps123971	eSSR75-377	Ps123971	eSSR338-224	0.527089	B	-	B	A	-	B	B	A	-	A	B	B	B	B	A	A	B	A	A	A	A	B	B	B	-	-	B	A	-	B	A	B	A	A	B	A	B	A	A	B	B	-
Ps122360	4.7	12	Ps123971	eSSR75-377	Ps123971	eSSR338-224	0.169912	B	B	B	A	B	B	B	A	A	A	B	B	B	B	-	A	B	-	A	A	A	B	B	B	A	B	B	A	B	B	A	B	-	-	B	A	B	A	A	B	B	A
Ps108486	4.7	12.6	Ps123971	eSSR75-377	Ps123971	eSSR338-224	0.763025	B	B	-	A	B	B	B	A	A	A	B	-	B	B	A	A	B	A	A	A	A	-	-	B	A	B	B	A	B	B	A	B	A	A	B	A	B	A	A	B	B	A
Ps110656	4.7	12.3	Ps123971	eSSR75-377	Ps123971	eSSR338-224	0.763025	B	B	B	A	B	B	B	A	A	A	B	-	B	B	A	A	B	A	A	A	A	B	B	B	A	B	B	A	B	B	A	B	A	A	B	A	B	A	A	B	-	A
Ps153099	4.7	11.4	Ps123971	eSSR75-377	Ps123971	eSSR338-224	0.87278	B	B	B	A	B	-	B	A	A	A	B	B	B	-	A	A	B	A	A	A	A	B	-	B	A	B	B	A	-	B	-	B	A	A	-	A	B	A	A	B	-	A
Ps152081	4.7	11.4	Ps123971	eSSR75-377	Ps123971	eSSR338-224	0.527089	B	-	B	A	B	B	B	A	A	A	B	B	B	B	A	A	-	A	A	A	A	B	-	B	-	B	B	A	B	B	-	B	A	A	B	A	B	A	A	-	B	-
Ps150805	4.7	11.1	Ps123971	eSSR75-377	Ps123971	eSSR338-224	0.527089	-	B	B	A	-	B	B	A	A	A	B	B	B	-	A	A	B	A	-	-	A	B	B	B	A	B	-	A	B	B	A	B	A	A	B	A	-	A	A	B	B	A
Ps102272	4.7	12.9	Ps123971	eSSR75-377	Ps123971	eSSR338-224	0.376344	B	B	B	A	B	B	B	A	A	A	B	B	B	B	A	A	B	A	A	A	A	B	-	B	A	B	B	A	B	B	A	B	A	A	B	A	B	A	-	B	B	A
Ps131270	4.7	11.7	Ps123971	eSSR75-377	Ps123971	eSSR338-224	0.757621	B	B	B	A	B	B	B	-	A	A	B	-	B	B	A	A	B	A	A	A	A	B	-	-	A	-	B	A	B	B	A	B	A	A	B	A	B	A	A	-	B	A
Ps158524	4.7	10.8	Ps123971	eSSR75-377	NA	eSSR338-224	0.33039	B	B	B	-	B	B	B	A	A	A	B	B	B	-	A	A	B	A	A	A	A	B	B	B	A	B	B	A	-	B	-	B	A	-	-	A	B	-	-	-	B	A
Ps123179	4.7	12.3	Ps123971	eSSR75-377	Ps123971	eSSR338-224	0.445766	B	B	B	A	B	B	B	A	A	A	B	B	B	B	A	A	B	-	A	A	A	-	-	B	A	B	B	A	B	B	A	B	A	A	B	A	B	A	-	B	B	A
Ps113951	4.7	12.9	Ps123971	eSSR75-377	Ps123971	eSSR338-224	0.546494	B	B	-	A	B	B	B	-	A	A	B	B	B	B	A	A	B	A	A	A	A	B	-	B	A	B	B	A	B	B	A	B	A	A	B	A	B	A	A	B	B	A
Ps138086	4.7	11.4	Ps123971	eSSR75-377	Ps123971	eSSR338-224	0.159854	B	B	B	A	B	B	B	-	A	A	B	B	B	B	A	A	B	A	A	-	A	B	-	B	A	B	B	A	B	B	-	B	A	A	B	A	-	-	A	B	B	A
Ps145951	4.7	11.1	Ps123971	eSSR75-377	Ps123971	eSSR338-224	0.342782	B	B	B	-	B	B	B	A	A	A	-	B	B	B	A	A	B	A	A	-	A	B	B	B	-	B	B	A	-	B	-	B	A	A	B	A	B	A	A	-	B	A
Ps120874	4.7	11.7	eSSR75-377	eSSR338-224	Ps123971	eSSR338-224	0.445766	B	B	B	A	-	B	B	A	A	A	B	B	B	B	A	A	B	A	A	-	A	B	B	B	A	-	-	A	B	B	A	B	A	A	B	A	B	A	A	B	B	-
Ps133605	4.7	12	Ps123971	eSSR75-377	Ps123971	eSSR338-224	0.537094	B	B	B	A	B	B	B	A	A	A	B	B	B	B	-	A	-	A	A	A	A	B	-	B	A	B	B	A	B	B	A	B	A	A	B	A	B	A	A	-	B	A
Ps106588	4.7	12.9	Ps123971	eSSR75-377	Ps123971	eSSR338-224	0.456057	B	B	B	A	B	B	B	A	A	A	B	B	B	B	A	A	B	A	A	A	-	B	-	B	A	B	B	A	B	B	A	B	A	A	B	A	B	A	A	B	B	A
Ps121090	4.7	12.3	eSSR75-377	eSSR338-224	Ps123971	eSSR338-224	0.647315	B	B	B	A	B	B	-	A	A	A	B	B	B	B	A	A	B	A	A	A	A	B	-	B	A	-	B	A	B	B	A	B	A	A	B	A	B	A	A	B	B	-
Ps149536	4.7	11.1	Ps123971	eSSR75-377	Ps123971	eSSR338-224	0.113846	B	B	B	A	B	B	B	A	A	A	-	B	B	B	A	A	B	A	A	-	A	B	-	B	A	B	B	-	B	B	A	B	-	-	B	A	B	A	-	B	B	A
Ps147893	4.7	11.1	Ps123971	eSSR75-377	NA	eSSR338-224	0.75183	B	-	B	A	B	-	B	A	A	A	-	B	-	A	A	A	B	A	A	A	A	B	B	B	A	B	-	A	B	B	A	B	A	A	B	-	B	A	A	B	B	A
Ps121096	4.7	12	Ps123971	eSSR75-377	Ps123971	eSSR338-224	0.445766	B	B	B	A	B	B	B	A	A	A	B	B	B	B	A	A	B	A	-	A	A	-	-	-	A	B	B	A	B	B	A	B	A	A	B	-	B	A	A	B	B	A
Ps122579	4.7	12.3	Ps123971	eSSR75-377	Ps123971	eSSR338-224	0.445766	B	B	B	A	B	B	B	A	A	A	B	B	B	B	A	A	-	A	A	A	-	B	-	B	A	B	B	-	B	B	A	B	A	A	B	A	B	A	A	B	B	A
Ps160039	4.7	10.5	eSSR75-377	eSSR338-224	Ps123971	eSSR338-224	0.33039	B	B	B	-	B	B	B	A	A	A	-	B	B	B	A	A	B	A	A	A	-	B	-	B	A	-	B	A	B	B	A	-	A	-	-	-	B	A	-	B	B	A
Ps134764	4.7	11.4	Ps123971	eSSR75-377	Ps123971	eSSR338-224	0.354539	B	B	B	A	B	B	B	A	A	A	B	B	B	B	A	-	B	A	A	A	A	B	B	B	A	-	B	A	B	-	A	B	A	A	B	-	B	A	A	-	B	-
Ps133876	4.7	11.7	Ps123971	eSSR75-377	Ps123971	eSSR338-224	0.537094	B	-	B	A	B	B	B	A	A	A	-	B	-	B	A	A	B	-	-	A	A	B	-	B	A	B	B	A	B	B	A	B	A	A	B	A	B	A	A	B	B	A
Ps112373	4.7	12	Ps123971	eSSR75-377	Ps123971	eSSR338-224	0.2278	B	B	B	A	B	B	B	-	A	A	B	B	B	B	A	A	B	A	A	A	A	B	B	B	A	B	B	A	B	B	A	-	A	A	B	A	B	A	-	B	B	A
Ps129205	4.7	11.7	Ps123971	eSSR75-377	Ps123971	eSSR338-224	0.354539	B	-	B	A	B	B	B	-	A	A	B	B	B	B	A	A	B	A	-	A	A	B	B	B	A	B	B	A	B	B	A	B	A	A	B	A	B	A	A	B	B	A
Ps105821	4.7	12.3	Ps123971	eSSR75-377	Ps123971	eSSR338-224	0.456057	B	-	B	A	B	B	B	A	A	A	B	B	B	B	A	A	B	A	A	A	A	B	B	B	A	B	B	A	B	B	A	B	A	A	B	A	B	A	A	-	B	A
Ps148709	4.7	11.4	Ps123971	eSSR75-377	Ps123971	eSSR338-224	0.527089	B	B	-	A	B	B	B	A	A	A	B	B	B	-	A	-	-	A	A	A	A	B	B	B	-	B	B	A	-	B	A	B	A	A	B	A	B	A	-	B	-	A
Ps140311	4.7	11.7	Ps123971	eSSR75-377	Ps123971	eSSR338-224	0.639412	B	B	B	A	B	B	B	A	A	-	B	B	B	-	A	A	B	A	A	A	A	-	B	-	A	-	B	A	B	B	-	B	A	A	B	A	B	A	A	B	B	A
Ps104537	4.7	12.6	Ps123971	eSSR75-377	Ps123971	eSSR338-224	0.456057	B	B	B	A	B	B	B	A	A	A	-	B	B	B	A	A	B	A	A	A	A	B	-	B	A	B	B	A	B	B	A	B	A	A	B	A	B	A	A	B	B	A
Ps143164	4.7	11.4	Ps123971	eSSR75-377	Ps123971	eSSR338-224	0.875896	B	B	B	A	B	B	B	A	A	A	-	B	-	B	A	A	B	-	A	A	A	-	-	B	A	B	B	A	B	B	A	-	A	A	B	A	-	A	A	B	B	A
Ps120664	4.7	12.3	Ps123971	eSSR75-377	Ps123971	eSSR338-224	0.647315	B	B	B	A	B	-	B	-	A	A	-	B	B	B	A	A	B	A	A	A	A	B	-	B	A	B	B	A	B	B	A	B	A	A	B	A	B	A	A	B	B	A
Ps001214	5.2	21.7	eSSR75-377	eSSR338-224	Ps123971	eSSR338-224	0.555346	B	B	B	A	B	B	B	A	A	A	B	B	B	B	A	A	B	A	A	A	A	B	-	B	A	B	B	A	B	B	A	B	A	A	B	A	B	A	A	B	B	A
eSSR338-224	6.3						1	B	B	B	A	B	B	B	A	A	A	B	B	B	B	A	A	B	A	A	A	A	B	-	B	A	A	B	A	B	B	A	B	A	A	B	A	A	A	A	B	B	A
Ps001529	6.3	25.3	eSSR75-377	eSSR338-224	eSSR75-377	Ps124536	0.881497	B	B	B	A	B	B	B	A	A	A	B	B	B	B	A	A	B	A	A	A	A	B	-	B	A	A	-	A	B	B	A	B	A	A	B	A	A	A	A	B	B	A
Ps100957	6.3	13.5	eSSR338-224	Ps124536	eSSR75-377	Ps124536	1	B	B	B	A	B	B	B	A	A	A	B	B	B	-	A	A	B	A	A	A	A	B	-	B	A	A	B	A	B	B	A	B	A	A	B	A	A	A	A	B	B	A
Ps135303	6.3	12.3	eSSR338-224	Ps124536	eSSR75-377	Ps124536	0.875896	B	B	B	A	B	B	B	A	-	-	B	B	B	B	A	A	B	A	A	-	A	-	-	B	A	A	B	A	B	B	A	B	A	A	B	A	A	A	A	-	B	A
Ps144890	6.3	11.4	eSSR75-377	eSSR338-224	eSSR75-377	Ps124536	0.75183	B	B	B	-	B	-	B	A	A	A	B	B	B	B	A	-	-	A	A	A	A	B	B	B	A	A	B	-	B	B	A	-	A	A	-	A	A	A	-	B	B	A
Ps117911	6.3	12.3	eSSR75-377	eSSR338-224	eSSR75-377	Ps124536	0.445766	B	B	B	A	B	B	B	A	A	A	B	B	B	B	A	A	B	A	A	-	A	-	B	B	A	A	B	A	B	B	A	B	A	-	B	-	-	A	A	B	B	A
Ps146106	6.3	11.7	eSSR338-224	Ps124536	eSSR75-377	Ps124536	0.527089	B	B	B	-	B	B	-	A	-	-	B	B	B	B	A	A	B	A	A	A	-	B	-	-	A	A	B	-	B	B	A	B	A	A	B	A	A	A	A	B	B	A
Ps133670	6.3	12.3	eSSR338-224	Ps124536	eSSR75-377	Ps124536	1	B	B	B	A	B	B	B	A	A	A	-	B	B	B	A	-	B	A	A	A	A	B	-	B	A	A	B	A	B	-	A	B	A	A	B	A	A	A	-	B	B	A
Ps104502	6.3	13.2	eSSR75-377	eSSR338-224	eSSR75-377	Ps124536	0.654721	B	B	B	A	B	B	B	A	A	A	B	B	B	B	A	A	B	A	A	A	-	B	B	B	A	A	B	A	B	B	A	B	A	A	B	A	A	A	-	B	B	A
Ps161190	6.3	10.8	eSSR75-377	eSSR338-224	eSSR75-377	Ps124536	0.621873	B	B	B	-	B	B	B	A	A	A	B	-	B	B	A	A	B	A	A	-	A	-	B	B	A	A	B	A	B	B	A	B	-	A	-	-	A	-	A	B	-	A
Ps113206	6.3	12.9	eSSR338-224	Ps124536	eSSR75-377	Ps124536	1	B	B	B	A	B	B	B	A	A	A	B	B	B	B	A	-	B	A	A	A	A	B	A	B	A	A	B	A	B	B	A	B	A	A	B	-	A	A	A	B	B	A
Ps129978	6.3	12.3	eSSR75-377	eSSR338-224	eSSR75-377	Ps124536	0.537094	B	B	B	A	B	B	B	A	A	A	B	B	B	B	A	A	B	A	A	-	A	B	-	B	A	A	-	A	B	-	A	-	A	A	B	A	A	A	A	B	B	A
Ps140713	6.3	12.3	eSSR338-224	Ps124536	eSSR75-377	Ps124536	0.639412	B	B	B	A	B	-	B	A	A	A	B	-	B	B	A	-	B	A	A	A	A	B	-	B	A	A	B	A	B	B	A	B	A	A	-	A	A	A	A	-	B	A
Ps137856	6.3	12	eSSR338-224	Ps124536	eSSR75-377	Ps124536	0.875896	B	B	B	A	B	-	B	A	A	A	B	B	B	B	A	A	B	A	A	A	A	-	-	B	A	A	B	-	B	B	A	-	A	A	B	A	A	A	A	B	B	A
Ps125357	6.3	12.3	eSSR338-224	Ps124536	eSSR75-377	Ps124536	0.354539	B	B	B	A	B	-	B	A	A	A	B	B	B	B	A	A	B	A	A	A	A	B	A	-	A	A	B	A	-	B	A	B	A	A	B	A	A	A	A	B	-	A
Ps137495	6.3	11.7	eSSR75-377	eSSR338-224	eSSR75-377	Ps124536	0.639412	B	B	B	A	B	B	B	A	A	A	B	B	B	B	A	A	B	A	-	A	A	B	A	-	A	-	-	A	B	B	A	B	A	A	B	A	A	A	-	B	B	-
Ps123729	6.3	12.3	eSSR338-224	Ps124536	eSSR75-377	Ps124536	0.878794	B	-	B	-	B	-	B	A	A	A	B	B	B	B	A	A	B	A	A	A	-	B	A	B	A	A	-	A	B	B	A	B	A	A	B	A	A	A	A	B	B	A
Ps109307	6.3	13.2	eSSR338-224	Ps124536	Ps123971	Ps124536	0.763025	B	B	B	A	B	B	B	A	A	A	B	B	B	B	A	A	B	A	A	A	A	B	-	B	A	-	B	A	B	B	A	B	A	A	B	A	-	A	A	B	B	A
Ps123049	6.3	12.6	eSSR75-377	eSSR338-224	eSSR75-377	Ps124536	0.878794	B	-	B	A	B	B	B	A	A	A	B	B	B	B	A	A	-	A	A	A	A	B	B	B	A	A	B	A	B	B	A	B	A	A	B	-	A	A	A	B	B	A
Ps105958	6.3	13.5	eSSR338-224	Ps124536	eSSR75-377	Ps124536	0.881497	B	B	B	A	B	-	B	A	A	A	B	B	B	B	A	A	B	A	A	A	A	B	-	B	A	A	B	A	B	B	A	B	A	A	B	A	A	A	A	B	B	A
Ps114949	6.3	12.3	eSSR75-377	eSSR338-224	eSSR75-377	Ps124536	0.878794	B	B	B	A	B	B	B	A	A	-	-	-	B	B	A	A	B	A	A	A	A	B	B	B	A	A	B	A	B	-	A	B	A	A	B	-	A	A	A	B	B	A
Ps120832	6.3	12.3	eSSR75-377	eSSR338-224	eSSR75-377	Ps124536	0.878794	B	B	B	A	B	B	B	A	A	-	B	B	B	B	A	A	B	A	A	A	A	B	B	-	A	A	-	A	B	B	A	B	A	A	-	A	A	-	A	B	B	A
Ps135199	6.3	12	eSSR75-377	eSSR338-224	eSSR75-377	Ps124536	0.875896	B	-	B	A	B	-	B	A	A	-	B	B	B	B	A	A	B	A	-	A	A	B	B	B	A	-	B	A	B	B	A	B	A	A	B	A	A	A	A	B	B	A
Ps128545	6.3	12.3	eSSR75-377	eSSR338-224	eSSR75-377	Ps124536	0.537094	B	B	B	A	B	B	B	A	A	A	B	B	B	B	A	A	B	A	-	A	A	B	-	B	A	A	B	A	B	B	-	B	A	A	B	A	-	A	A	-	B	-
Ps108619	6.3	12.9	eSSR75-377	eSSR338-224	eSSR75-377	Ps124536	1	B	B	B	A	B	B	-	A	A	A	B	B	B	B	A	A	B	A	A	A	A	B	B	-	A	A	B	A	B	B	A	B	A	A	B	A	A	A	-	B	B	A
Ps147739	6.3	11.4	eSSR75-377	eSSR338-224	eSSR75-377	Ps124536	0.75183	B	B	B	A	B	-	B	A	-	-	B	-	B	B	A	A	B	A	A	A	A	B	B	-	A	-	B	A	B	B	A	B	A	A	B	A	A	A	-	-	B	A
Ps127987	6.3	12	eSSR75-377	eSSR338-224	eSSR75-377	Ps124536	0.537094	B	B	B	-	B	B	B	A	A	A	B	B	B	-	A	A	-	A	A	A	-	B	B	B	A	A	B	-	B	B	A	B	A	A	B	-	A	A	A	B	B	A
Ps160144	6.3	11.4	eSSR338-224	Ps124536	eSSR75-377	Ps124536	0.745603	B	B	B	A	B	B	-	A	A	A	B	-	B	B	A	A	-	A	A	A	A	B	-	B	-	A	B	A	B	B	A	B	A	A	B	-	A	A	-	B	B	A
Ps138697	6.3	12	eSSR75-377	eSSR338-224	eSSR75-377	Ps124536	0.639412	B	-	B	A	B	B	B	A	A	A	B	-	B	B	A	A	B	A	A	A	A	-	B	B	A	A	B	A	B	-	A	-	A	A	B	A	A	A	A	B	B	A
Ps126589	6.3	12.3	eSSR75-377	eSSR338-224	eSSR75-377	Ps124536	0.757621	B	B	B	A	B	B	B	A	-	A	B	-	B	B	A	A	B	A	A	A	A	B	B	B	A	A	B	A	B	B	A	B	A	-	-	A	-	A	A	B	B	A
Ps129316	6.3	12	eSSR75-377	eSSR338-224	eSSR75-377	Ps124536	0.354539	B	B	B	-	B	B	B	A	-	-	B	B	B	B	-	A	B	A	A	A	-	B	B	B	A	A	B	A	B	B	A	-	A	A	B	A	A	A	A	B	B	A
Ps134905	6.3	12.3	eSSR75-377	eSSR338-224	eSSR75-377	Ps124536	0.757621	B	B	-	A	B	B	B	A	A	-	B	B	B	B	A	A	B	A	-	A	A	B	-	B	A	-	B	A	B	B	A	B	A	A	B	A	A	A	-	B	B	A
Ps103663	6.3	13.2	eSSR338-224	Ps124536	eSSR75-377	Ps124536	0.881497	B	B	B	A	B	B	B	A	A	A	B	B	B	B	A	A	B	A	A	A	A	B	-	B	A	A	B	A	B	-	A	B	A	A	B	A	A	A	-	B	B	A
Ps122563	6.3	12.6	eSSR75-377	eSSR338-224	eSSR75-377	Ps124536	0.878794	B	-	B	A	B	B	B	-	A	A	B	B	-	B	A	A	B	A	A	A	A	B	B	B	A	A	B	A	B	B	A	B	A	A	B	A	A	A	A	B	B	A
Ps153754	6.3	11.4	eSSR338-224	Ps124536	eSSR75-377	Ps124536	0.630954	B	B	B	A	B	B	B	A	A	A	B	B	B	B	A	A	-	A	A	-	A	-	-	B	A	A	B	-	B	B	A	B	A	-	B	-	A	-	A	B	-	A
Ps114560	6.3	12.3	eSSR75-377	eSSR338-224	eSSR75-377	Ps124536	0.647315	B	B	B	A	B	B	B	-	A	A	B	B	B	B	A	A	B	A	-	A	A	B	A	B	A	A	B	A	B	B	A	B	A	A	-	A	-	A	-	B	B	A
Ps142888	6.3	12	eSSR338-224	Ps124536	eSSR75-377	Ps124536	0.875896	B	B	B	A	B	B	B	A	A	A	B	B	B	B	-	A	B	A	A	A	-	-	-	B	A	A	-	A	B	B	-	B	A	A	B	A	A	A	A	B	B	A
Ps116881	6.3	12.3	eSSR75-377	eSSR338-224	eSSR75-377	Ps124536	0.878794	-	B	B	A	B	-	B	-	A	A	B	B	B	B	A	A	B	A	A	A	A	B	B	B	-	A	B	A	B	B	A	B	A	A	B	A	A	A	A	B	B	A
Ps143814	6.3	12	eSSR75-377	eSSR338-224	eSSR75-377	Ps124536	0.875896	B	B	B	A	B	B	-	A	A	A	B	B	B	B	A	A	B	A	A	-	A	B	B	B	A	A	B	A	B	-	A	B	A	A	B	-	A	A	-	B	B	A
Ps113709	6.3	12.6	eSSR338-224	Ps124536	eSSR75-377	Ps124536	1	B	B	-	A	-	B	B	A	-	A	B	B	B	B	A	A	B	A	A	A	A	B	A	B	A	A	B	A	B	B	A	B	A	A	B	A	A	-	A	B	B	A
Ps140984	6.3	12	eSSR338-224	Ps124536	eSSR75-377	Ps124536	0.639412	B	B	B	A	B	B	B	A	A	A	B	B	B	-	A	A	B	A	-	A	A	B	-	-	A	A	B	A	B	-	A	B	A	A	B	A	A	A	-	-	B	A
Ps121935	6.3	12.6	eSSR338-224	Ps124536	eSSR75-377	Ps124536	0.647315	B	-	B	A	-	B	B	A	A	A	B	B	B	B	A	A	B	A	A	A	A	B	-	B	A	A	B	A	B	B	A	-	A	A	B	A	A	A	A	-	B	A
Ps124810	6.3	12.3	eSSR338-224	Ps124536	eSSR75-377	Ps124536	0.757621	B	B	B	A	B	B	B	A	A	A	-	B	B	B	A	A	B	A	A	A	A	B	-	B	-	A	-	A	B	-	A	B	A	A	B	A	A	A	A	B	-	A
Ps136307	6.3	11.7	eSSR75-377	eSSR338-224	eSSR75-377	Ps124536	0.639412	B	B	-	A	-	B	B	A	A	A	B	B	B	B	A	-	B	A	A	A	A	B	B	-	-	A	B	-	B	B	A	B	A	A	B	A	A	A	A	B	B	A
Ps141903	6.3	11.7	eSSR338-224	Ps124536	eSSR75-377	Ps124536	0.639412	B	B	B	A	B	B	B	-	A	A	B	B	B	B	A	A	-	A	A	A	A	B	A	B	A	A	-	A	B	B	-	-	A	A	B	A	A	A	A	B	-	A
Ps139556	6.3	12	eSSR338-224	Ps124536	eSSR75-377	Ps124536	0.875896	B	B	B	A	B	B	B	A	A	-	B	B	B	-	A	A	B	A	A	A	A	-	-	B	-	-	B	A	B	B	A	B	A	A	B	A	A	A	A	B	B	A
Ps122612	6.3	12.3	eSSR75-377	eSSR338-224	eSSR75-377	Ps124536	0.647315	-	B	B	-	B	B	B	A	A	A	B	B	B	B	A	A	B	A	A	A	A	B	B	B	A	A	-	A	B	B	-	B	A	A	B	A	A	A	-	B	B	A
Ps129294	6.3	12.3	eSSR338-224	Ps124536	eSSR75-377	Ps124536	0.757621	B	B	B	A	B	B	B	A	A	A	B	B	B	B	A	A	B	A	A	A	A	-	-	B	A	A	B	A	B	B	A	B	-	A	B	A	A	A	-	B	-	A
Ps124286	6.3	12.9	eSSR338-224	Ps124536	eSSR75-377	Ps124536	0.647315	B	B	B	A	B	B	B	A	A	A	B	B	B	B	A	A	-	A	A	A	A	B	-	B	A	A	B	A	B	B	A	B	A	A	B	A	A	A	A	-	B	A
Ps148797	6.3	11.7	eSSR338-224	Ps124536	eSSR75-377	Ps124536	1	-	B	B	A	B	B	B	A	A	A	B	B	-	B	A	A	B	-	A	-	A	-	-	B	A	A	B	A	B	-	A	B	A	A	B	-	A	A	A	B	B	A
Ps123667	6.3	12.6	eSSR338-224	Ps124536	eSSR75-377	Ps124536	0.878794	B	B	B	A	B	B	B	A	-	A	B	B	B	B	A	A	B	A	A	A	-	B	-	B	A	A	B	A	B	B	A	B	A	A	-	A	A	A	A	B	B	A
Ps152552	6.3	11.7	eSSR338-224	Ps124536	eSSR75-377	Ps124536	0.630954	B	B	B	A	B	B	B	A	A	A	-	B	B	B	A	A	B	A	A	-	A	B	-	B	-	A	B	A	B	B	A	B	-	-	B	A	A	A	-	B	B	A
Ps134271	6.3	12.6	eSSR338-224	Ps124536	eSSR75-377	Ps124536	1	B	B	B	A	B	B	B	A	A	A	B	B	-	B	-	A	B	A	A	A	A	-	-	B	A	A	B	A	B	B	A	B	A	A	B	-	A	A	A	B	B	A
Ps163125	6.3	10.8	eSSR338-224	Ps124536	eSSR75-377	Ps124536	0.504985	B	B	B	A	B	B	-	-	A	-	B	B	B	B	A	A	B	A	-	A	A	B	-	B	-	A	B	A	B	-	A	-	A	A	B	-	A	-	A	B	B	A
Ps129458	6.3	12.3	eSSR338-224	Ps124536	eSSR75-377	Ps124536	0.757621	B	B	B	A	-	B	B	A	-	A	B	-	B	B	A	A	B	-	A	A	A	B	-	B	A	A	B	A	B	B	A	B	A	-	B	A	A	A	A	B	B	A
Ps133155	6.3	12.3	eSSR338-224	Ps124536	eSSR75-377	Ps124536	0.757621	B	B	B	A	B	B	B	A	A	A	B	B	B	B	A	A	B	A	A	A	A	B	-	B	A	A	B	-	B	B	A	B	A	-	B	A	A	-	A	-	-	A
Ps138484	6.3	12	eSSR75-377	eSSR338-224	eSSR75-377	Ps124536	0.875896	B	B	B	A	B	B	B	A	A	-	-	B	B	B	A	A	B	A	A	A	A	B	B	B	A	A	B	A	B	B	A	-	-	A	-	A	A	A	A	B	B	A
Ps104621	6.3	12.9	eSSR75-377	eSSR338-224	eSSR75-377	Ps124536	0.881497	B	B	B	A	B	B	B	A	A	A	B	B	-	B	A	A	B	A	A	A	-	-	B	B	A	A	B	A	B	B	A	B	A	A	B	A	A	A	A	B	B	A
Ps154586	6.3	11.4	eSSR75-377	eSSR338-224	eSSR75-377	Ps124536	0.42334	-	B	B	A	B	B	B	A	A	A	B	B	B	-	A	-	B	A	-	A	A	B	B	B	-	A	B	A	B	B	A	B	A	-	B	-	A	A	A	B	B	A
Ps102987	6.3	12.9	eSSR75-377	eSSR338-224	eSSR75-377	Ps124536	0.881497	B	B	B	A	B	B	B	A	A	A	B	-	-	B	A	A	B	A	A	A	A	B	B	B	A	A	B	A	B	B	A	B	A	A	B	-	A	A	A	B	B	A
Ps106435	6.3	13.2	eSSR75-377	eSSR338-224	eSSR75-377	Ps124536	0.881497	B	B	B	A	B	B	B	A	A	A	B	B	B	B	A	A	B	A	A	A	A	B	-	B	A	-	B	A	B	B	A	B	A	A	B	A	A	A	A	-	B	A
Ps157981	6.3	11.1	eSSR338-224	Ps124536	eSSR75-377	Ps124536	1	B	-	B	A	B	-	B	A	A	A	-	B	-	B	A	A	B	A	-	A	A	B	-	B	A	A	B	A	B	B	A	-	-	-	B	A	A	A	-	B	B	A
Ps155311	6.3	11.7	eSSR338-224	Ps124536	eSSR75-377	Ps124536	0.87278	B	B	B	A	B	B	B	A	A	A	B	B	B	-	A	A	B	A	-	A	A	B	-	B	A	A	-	A	-	B	A	B	A	A	B	-	-	A	A	B	B	-
Ps138095	6.3	11.7	eSSR75-377	eSSR338-224	eSSR75-377	Ps124536	0.639412	B	B	B	A	B	B	B	A	A	A	B	B	B	-	-	A	B	A	A	A	A	B	B	B	A	-	B	A	B	B	A	B	A	A	B	A	A	-	-	-	B	A
Ps135356	6.3	12	eSSR338-224	Ps124536	eSSR75-377	Ps124536	0.875896	B	B	B	A	B	-	B	A	A	A	B	-	B	B	-	A	B	A	A	-	A	B	A	B	A	A	B	A	B	B	A	B	A	A	B	A	A	-	A	-	B	A
Ps150148	6.3	11.7	eSSR338-224	Ps124536	eSSR75-377	Ps124536	0.75183	-	B	-	A	B	B	B	A	A	A	B	B	B	-	A	A	-	A	-	A	A	-	-	B	A	A	B	A	B	B	A	B	A	A	B	A	-	A	A	B	B	A
Ps140810	6.3	12.3	eSSR75-377	eSSR338-224	eSSR75-377	Ps124536	0.875896	B	B	B	A	B	B	B	A	A	A	B	B	B	B	A	A	-	A	A	A	A	B	-	B	A	-	B	-	B	B	A	B	A	A	B	A	A	A	A	B	B	A
Ps131127	6.3	12	eSSR75-377	eSSR338-224	eSSR75-377	Ps124536	0.757621	B	B	B	A	B	B	B	A	A	A	B	B	B	B	-	A	B	A	-	-	A	B	B	B	A	A	-	A	B	B	A	B	A	A	B	A	A	A	A	B	B	A
Ps141496	6.3	12	eSSR338-224	Ps124536	eSSR75-377	Ps124536	0.875896	B	B	B	-	B	B	B	A	-	A	B	B	B	B	A	A	-	A	A	A	A	B	-	B	A	A	B	A	B	B	A	-	A	A	B	-	A	A	A	B	-	A
Ps148111	6.3	11.7	eSSR75-377	eSSR338-224	eSSR75-377	Ps124536	0.75183	B	-	B	A	B	-	B	A	A	A	B	B	B	B	A	A	B	A	A	-	A	B	B	B	A	A	B	A	B	B	A	B	A	A	B	-	-	A	-	B	B	A
Ps148715	6.3	12	eSSR338-224	Ps124536	eSSR75-377	Ps124536	0.527089	-	B	B	A	B	B	B	A	A	A	B	B	B	B	A	A	B	-	A	A	A	B	-	B	A	A	B	A	B	B	A	B	A	-	B	-	A	A	A	B	B	A
Ps119971	6.3	12.6	eSSR338-224	Ps124536	eSSR75-377	Ps124536	0.878794	B	B	B	A	B	B	-	A	A	A	B	B	B	B	A	A	B	A	A	A	A	B	-	B	A	A	-	A	B	B	-	-	A	A	B	A	A	A	A	B	B	A
Ps139950	6.3	11.7	eSSR75-377	eSSR338-224	eSSR75-377	Ps124536	0.875896	B	-	B	A	B	B	B	A	A	A	B	-	B	B	A	A	B	A	A	-	A	B	B	B	-	A	B	A	B	B	A	B	A	A	-	A	A	A	A	B	B	A
Ps162763	6.3	10.2	eSSR75-377	eSSR338-224	eSSR75-377	Ps124536	0.738883	B	-	B	A	B	-	B	A	A	-	B	B	B	-	A	A	B	A	A	A	A	B	B	B	A	A	B	-	-	-	A	B	A	A	B	A	A	-	-	B	B	-
Ps158710	6.3	11.4	eSSR338-224	Ps124536	eSSR75-377	Ps124536	0.516412	B	B	B	A	-	B	B	A	A	A	-	B	B	B	A	A	B	A	A	A	A	-	-	B	A	A	B	-	B	B	A	B	A	A	-	-	A	A	A	B	-	A
Ps141309	6.3	12	eSSR338-224	Ps124536	eSSR75-377	Ps124536	0.875896	B	B	B	A	B	B	B	A	A	A	-	B	B	B	A	A	-	A	-	A	-	B	-	B	A	A	-	A	B	B	A	B	A	A	B	A	A	A	A	B	-	A
Ps129734	6.3	12	eSSR75-377	eSSR338-224	eSSR75-377	Ps124536	0.757621	B	B	B	A	B	B	B	A	A	A	-	B	B	B	A	A	B	A	A	-	A	B	B	B	A	A	B	-	-	B	A	-	A	A	B	A	A	A	-	B	B	A
Ps132466	6.3	12.6	eSSR75-377	eSSR338-224	eSSR75-377	Ps124536	0.757621	B	B	B	A	-	B	B	A	A	A	B	B	B	B	A	-	B	A	A	A	A	B	-	B	A	-	B	A	B	B	A	B	-	A	B	A	A	A	A	B	B	A
Ps147830	6.3	11.7	eSSR75-377	eSSR338-224	eSSR75-377	Ps124536	0.75183	B	B	B	A	B	B	B	A	A	A	-	B	B	B	A	A	B	A	A	-	A	B	-	B	-	A	B	A	-	B	A	B	A	A	B	A	-	-	A	-	B	A
Ps135636	6.3	12.3	eSSR338-224	Ps124536	eSSR75-377	Ps124536	0.875896	-	B	B	A	B	B	B	A	A	A	B	B	-	B	A	A	B	A	A	A	A	B	-	B	A	A	B	A	B	B	A	B	A	-	B	A	A	A	-	-	B	A
Ps155862	6.3	11.4	eSSR338-224	Ps124536	eSSR75-377	Ps124536	0.42334	B	B	B	-	B	B	B	A	A	A	-	B	B	B	A	-	B	A	A	A	A	B	-	B	A	A	-	-	B	B	A	B	A	-	B	A	A	A	-	B	B	A
Ps135978	6.3	12	eSSR75-377	eSSR338-224	eSSR75-377	Ps124536	0.875896	B	B	-	A	B	B	-	A	A	A	B	B	B	B	-	A	B	A	A	A	A	B	B	B	A	A	B	A	-	B	A	B	A	A	B	A	A	A	-	B	-	A
Ps107043	6.3	12.6	eSSR75-377	eSSR338-224	eSSR75-377	Ps124536	0.546494	B	B	B	A	B	-	B	A	A	-	B	B	B	B	A	-	B	A	A	A	A	B	B	B	A	A	B	A	B	B	A	B	A	A	B	A	A	A	A	B	B	A
Ps160732	6.3	10.5	eSSR75-377	eSSR338-224	eSSR75-377	Ps124536	0.621873	-	B	B	A	B	B	B	A	A	-	B	B	B	-	A	A	B	-	A	A	A	B	B	B	A	A	B	-	-	-	A	B	A	A	B	A	-	A	-	-	B	A
Ps131535	6.3	12.3	eSSR338-224	Ps124536	eSSR75-377	Ps124536	0.757621	B	B	-	A	B	-	B	A	A	-	B	B	B	B	A	A	B	A	A	A	A	B	-	B	A	A	B	A	B	B	A	B	A	A	B	A	A	A	A	B	B	A
Ps142448	6.3	12	eSSR338-224	Ps124536	eSSR75-377	Ps124536	0.875896	B	B	B	A	B	B	B	A	A	A	B	B	B	B	A	A	B	A	A	-	A	B	-	B	A	A	-	A	B	B	A	B	A	-	-	A	A	A	-	B	B	A
Ps163618	6.7	8.3	eSSR338-224	Ps124536	eSSR75-377	Ps124536	0.865772	B	B	B	A	B	B	-	A	A	A	B	B	B	B	A	A	-	-	A	-	-	B	-	-	A	A	-	-	-	-	A	B	A	A	B	A	A	A	B	-	B	A
Ps154626	7.2	9.4	eSSR338-224	Ps124536	eSSR338-224	Ps001466	0.42334	B	B	-	A	B	B	B	A	B	A	B	B	B	-	A	A	B	A	A	A	A	B	B	B	A	A	B	-	-	B	-	B	A	-	B	A	-	A	-	B	-	A
Ps141945	7.2	10	eSSR338-224	Ps124536	eSSR75-377	Ps001466	0.875896	B	B	B	A	B	B	-	A	-	A	B	B	B	A	A	A	B	A	A	A	A	B	B	B	-	A	B	A	-	B	A	B	A	A	B	-	-	A	A	B	-	A
Ps147216	7.2	11.7	eSSR338-224	Ps124536	eSSR338-224	Ps900057	1	B	B	B	A	B	-	B	A	B	A	B	B	B	-	A	A	B	A	A	A	A	B	B	B	A	A	-	A	-	B	A	-	A	A	B	-	A	A	A	B	B	A
Ps158431	7.2	11.1	eSSR338-224	Ps124536	eSSR338-224	W19_900	0.516412	B	B	B	A	B	B	B	A	B	A	B	B	B	-	-	A	B	A	A	A	A	B	B	B	A	A	B	A	-	B	A	B	-	A	B	A	A	-	-	-	-	A
Ps145895	7.2	9.7	eSSR338-224	Ps124536	eSSR338-224	Ps001466	0.75183	B	B	-	A	B	-	B	A	-	A	-	B	B	A	A	A	B	A	A	A	A	B	B	B	A	A	-	A	-	B	A	B	A	-	B	A	A	-	A	B	B	A
Ps108159	7.4	12.9	eSSR338-224	Ps124536	eSSR338-224	W19_900	1	B	B	B	A	B	B	B	A	B	A	-	B	B	A	A	A	B	A	A	A	-	B	B	B	A	A	B	A	-	B	A	B	A	A	B	A	A	A	A	B	B	A
Ps157743	7.4	11.1	eSSR338-224	Ps124536	eSSR338-224	Ps000092	1	-	B	B	-	B	B	B	A	B	-	B	-	B	A	A	A	-	A	A	A	A	B	B	B	A	A	-	A	-	B	A	B	A	-	B	A	A	A	-	B	B	A
Ps136405	7.4	12	eSSR338-224	Ps124536	eSSR338-224	W19_900	0.875896	B	B	B	A	B	B	B	A	B	A	B	B	B	A	A	A	B	A	A	A	A	B	B	B	-	A	B	A	-	B	A	-	A	A	B	-	A	A	-	B	-	A
Ps130980	7.5	12.3	eSSR338-224	Ps124536	eSSR338-224	W19_900	0.757621	B	B	B	A	B	B	B	A	B	A	B	B	B	A	A	A	B	-	-	A	A	B	B	B	A	A	B	A	-	-	A	B	A	A	B	A	A	A	A	B	B	A
Ps151793	7.5	9.7	eSSR338-224	Ps124536	eSSR338-224	Ps001466	0.75183	-	B	B	A	B	-	B	A	B	A	B	B	B	A	A	-	B	A	A	A	-	-	B	B	A	A	B	A	-	B	A	B	-	A	B	A	-	A	A	B	B	A
Ps120323	7.5	12.6	eSSR338-224	Ps124536	eSSR338-224	Ps900057	0.647315	B	B	B	A	B	B	B	A	B	A	B	B	B	A	A	A	-	A	A	A	A	B	B	B	A	A	-	A	-	-	A	B	A	A	B	A	A	A	A	B	B	A
Ps115683	7.5	12.6	eSSR338-224	Ps124536	eSSR338-224	W19_900	0.878794	B	B	-	A	B	B	B	A	B	A	B	B	B	A	A	A	B	A	A	A	A	-	B	B	A	A	B	-	-	B	A	B	A	A	B	A	A	A	A	B	B	A
Ps124536	8.1						0.757621	B	B	B	A	B	-	B	A	B	A	B	-	B	A	A	A	B	A	A	A	A	B	A	-	A	A	B	-	B	B	A	B	A	A	B	A	A	A	A	-	B	A
Ps121335	8.1	11.4	Ps124536	Ps001466	eSSR338-224	Ps001466	0.878794	B	B	B	A	B	B	B	A	B	A	B	B	B	A	A	A	B	A	A	-	A	B	-	-	A	A	B	A	-	B	A	B	A	A	B	A	A	A	A	B	B	A
Ps146374	8.1	10.8	Ps124536	Ps001466	eSSR338-224	Ps001466	0.75183	B	B	B	A	B	B	-	A	B	A	B	-	B	A	-	-	B	A	A	A	A	B	-	B	A	A	B	-	-	B	A	B	-	A	B	A	A	A	A	B	B	A
Ps157176	8.1	10.2	eSSR338-224	Ps124536	eSSR338-224	Ps001466	0.42334	B	B	B	A	B	B	-	A	-	A	B	B	B	A	A	A	-	A	A	A	A	B	-	B	A	-	B	A	-	B	A	B	A	A	-	A	A	A	A	-	B	A
Ps132686	8.1	10.8	Ps124536	Ps001466	eSSR338-224	Ps001466	0.757621	B	B	-	-	B	B	B	A	B	A	B	B	-	A	A	A	B	A	A	A	A	B	-	B	A	A	B	A	-	B	A	B	A	A	B	A	A	A	A	B	B	A
Ps129807	8.1	10.8	Ps124536	Ps001466	eSSR338-224	Ps001466	0.757621	B	-	B	-	B	B	B	A	B	A	B	B	B	A	A	A	B	A	-	A	A	B	-	B	A	A	B	A	B	B	A	B	A	A	B	-	A	A	A	B	B	A
Ps155319	8.1	9.9	Ps124536	Ps001466	eSSR338-224	Ps001466	0.87278	B	B	B	A	B	B	B	A	B	A	B	B	-	A	A	A	B	A	A	A	A	-	-	B	A	A	B	A	-	B	A	B	-	A	-	A	-	A	A	B	B	-
Ps151147	8.1	10.5	Ps124536	Ps001466	eSSR338-224	Ps001466	1	B	B	B	A	B	B	B	A	B	A	B	-	-	A	A	A	B	A	A	-	A	B	-	B	-	A	B	A	-	-	A	B	-	A	B	A	A	A	A	B	B	A
Ps127762	8.1	10.8	eSSR338-224	Ps124536	eSSR338-224	Ps001466	1	-	B	B	A	B	B	B	A	B	A	B	B	B	A	A	A	B	A	-	-	A	-	A	B	A	A	B	A	B	B	A	B	A	A	B	A	A	A	A	B	B	A
Ps143691	8.9	10.3	Ps124536	Ps001466	Ps124536	Ps001466	0.875896	B	B	B	A	B	B	B	A	-	A	B	B	-	-	A	A	B	-	A	A	A	B	-	B	A	A	-	A	A	B	A	B	A	A	B	A	A	A	A	B	B	A
Ps151999	8.9	10	Ps124536	Ps001466	Ps124536	Ps001466	0.75183	B	B	B	A	B	B	-	A	B	A	B	B	B	A	A	-	B	-	A	A	-	B	-	B	A	A	B	A	A	B	A	B	-	A	B	A	A	-	A	-	B	A
Ps111098	8.9	11.2	Ps124536	Ps001466	Ps124536	Ps001466	0.763025	B	B	B	A	B	B	B	A	B	A	B	B	B	A	A	A	B	A	A	A	A	B	-	B	A	A	B	A	A	B	A	B	A	A	B	A	A	A	A	B	-	-
Ps110715	8.9	11.2	Ps124536	Ps001466	Ps124536	Ps001466	1	B	B	B	A	B	B	B	A	B	-	B	B	B	A	A	A	B	A	A	A	A	B	-	B	A	A	B	A	A	B	A	B	A	A	B	A	A	A	A	B	B	-
Ps121692	8.9	10.9	Ps124536	Ps001466	Ps124536	Ps001466	0.878794	B	-	-	A	B	B	B	-	B	-	B	B	B	A	A	A	B	A	A	A	A	B	-	B	A	A	B	A	A	B	A	B	A	A	B	A	A	A	A	B	B	A
Ps109812	8.9	11.2	Ps124536	Ps001466	Ps124536	Ps001466	0.763025	B	B	B	A	B	B	B	A	B	A	B	B	-	A	A	A	B	A	A	A	A	B	-	B	A	A	B	A	A	B	A	B	A	-	B	A	A	A	A	B	-	A
Ps127350	8.9	10.3	Ps124536	Ps001466	Ps124536	Ps001466	0.757621	B	B	B	A	B	B	B	A	B	A	-	B	B	A	A	A	B	A	A	-	-	B	A	B	A	A	B	A	A	B	A	B	A	A	-	A	A	A	A	B	-	-
Ps120803	8.9	10.9	Ps124536	Ps001466	Ps124536	Ps001466	0.647315	B	B	B	A	B	B	B	A	-	A	B	B	B	A	A	A	B	A	-	A	A	B	-	B	A	A	B	A	A	-	A	B	A	A	-	A	A	A	A	B	B	A
Ps143088	8.9	10.3	Ps124536	Ps001466	Ps124536	Ps001466	0.639412	B	B	B	A	-	B	B	A	-	A	B	B	B	A	A	-	-	A	A	A	A	B	-	B	A	A	B	A	A	B	A	B	-	A	B	A	A	A	A	B	B	A
Ps144102	8.9	10.3	Ps124536	Ps001466	Ps124536	Ps001466	0.274299	B	B	-	A	B	B	-	A	-	A	B	B	B	A	A	A	B	A	A	A	A	B	-	B	A	A	B	A	A	B	A	-	A	A	-	A	A	A	A	B	B	A
Ps137236	8.9	10.3	Ps124536	Ps001466	Ps124536	Ps001466	0.875896	-	B	B	A	-	B	B	A	B	A	B	B	B	A	-	A	B	A	A	A	A	B	-	B	A	A	B	A	A	-	A	B	A	A	B	A	-	A	A	B	B	A
Ps144195	8.9	10.3	Ps124536	Ps001466	Ps124536	Ps001466	0.639412	B	B	B	A	B	B	B	A	B	A	B	-	B	A	A	A	B	A	A	A	-	B	-	B	A	A	-	A	A	B	A	-	-	A	B	A	A	A	A	B	B	A
Ps106185	8.9	11.5	Ps124536	Ps001466	Ps124536	Ps001466	0.881497	B	B	B	A	B	B	B	A	B	A	B	B	B	-	A	A	B	A	A	A	A	B	-	B	A	A	B	A	A	B	A	B	A	A	B	A	A	A	A	B	B	-
Ps136845	8.9	10.3	Ps124536	Ps001466	Ps124536	Ps001466	0.875896	B	B	B	A	B	B	B	A	B	A	B	B	B	A	-	A	-	A	A	A	A	B	-	B	A	A	B	A	A	B	A	B	-	A	B	A	A	A	-	-	B	A
Ps119307	8.9	10.9	Ps124536	Ps001466	Ps124536	Ps001466	0.445766	B	B	-	A	-	B	-	A	B	A	B	B	B	A	A	A	B	A	A	A	A	B	-	B	A	A	B	A	A	B	A	B	A	A	B	A	A	A	A	B	B	A
Ps145422	8.9	10	Ps124536	Ps001466	Ps124536	Ps001466	1	B	B	B	-	-	B	B	A	B	A	B	B	B	-	A	A	B	A	A	A	A	B	-	B	A	A	B	A	A	B	A	-	A	A	B	A	A	A	A	B	-	A
Ps152792	8.9	9.7	Ps124536	Ps001466	Ps124536	Ps001466	0.630954	B	B	B	-	B	B	B	A	B	A	B	B	-	A	A	A	-	A	A	A	A	B	-	B	A	A	B	A	A	-	A	B	A	-	-	-	A	A	A	-	B	A
Ps118541	8.9	10.9	Ps124536	Ps001466	Ps124536	Ps001466	0.878794	B	B	B	A	-	B	B	A	B	A	B	B	B	A	A	A	B	A	A	A	-	B	-	B	A	A	B	A	A	B	A	B	A	A	B	A	A	A	-	B	B	A
Ps117643	8.9	10.9	Ps124536	Ps001466	Ps124536	Ps001466	0.878794	B	B	B	A	B	B	B	A	B	-	-	B	B	A	A	A	B	A	-	A	A	B	-	B	A	A	B	A	A	-	A	B	A	A	B	A	A	A	A	B	B	A
Ps144202	8.9	10.3	Ps124536	Ps001466	Ps124536	Ps001466	0.639412	B	B	B	A	B	B	B	A	B	A	B	B	B	A	A	-	-	A	A	A	-	B	-	B	A	A	B	A	A	B	-	B	A	-	B	A	A	A	A	B	B	A
Ps160274	8.9	9.4	Ps124536	Ps001466	Ps124536	Ps001466	0.745603	B	B	-	A	B	B	B	A	B	A	B	B	B	A	A	A	-	A	A	A	A	B	-	-	-	A	B	A	A	B	A	B	A	A	-	A	A	-	-	B	B	-
Ps115879	8.9	10.9	Ps124536	Ps001466	Ps124536	Ps001466	0.647315	-	-	B	A	B	B	B	A	B	A	B	B	B	A	A	A	B	A	A	A	A	B	-	B	A	A	B	A	A	B	A	B	A	A	B	-	A	A	A	B	-	A
Ps136770	8.9	10.3	Ps124536	Ps001466	Ps124536	Ps001466	0.875896	B	B	B	-	B	B	B	-	B	A	B	-	B	A	A	A	B	-	A	A	A	B	-	B	A	A	B	A	A	-	A	B	A	A	B	A	A	A	A	B	-	A
Ps122831	9	10.9	Ps124536	Ps001466	Ps124536	Ps001466	0.647315	B	B	B	A	-	B	B	A	B	A	B	B	B	A	A	A	B	A	A	A	A	B	-	-	A	A	B	A	A	B	A	B	A	A	B	-	A	A	A	-	B	A
Ps151865	9	10	Ps124536	Ps001466	Ps124536	Ps001466	1	B	B	B	A	-	B	B	A	B	A	B	-	B	A	A	A	B	A	A	A	-	B	-	-	A	A	B	A	A	B	-	B	-	A	B	A	-	A	A	B	B	A
Ps158257	9	9.4	Ps124536	Ps001466	Ps124536	Ps001466	0.745603	B	B	B	A	B	B	B	A	B	A	B	B	B	A	-	A	B	A	A	A	A	B	-	-	A	A	B	A	A	B	A	B	-	A	B	-	-	A	A	-	-	A
Ps155105	9	9.7	Ps124536	Ps001466	Ps124536	Ps001466	0.42334	B	-	B	-	-	B	B	A	-	A	-	B	B	A	A	A	B	A	A	-	A	B	-	B	A	A	B	A	A	-	A	B	A	A	B	A	A	A	A	B	B	A
Ps100500	9	11.8	Ps124536	Ps001466	Ps124536	Ps001466	0.66168	B	B	B	A	B	B	B	A	B	A	B	B	B	A	A	A	B	A	A	A	A	B	A	B	A	A	B	A	A	B	A	B	A	A	B	A	A	A	A	B	B	A
Ps114888	9	10.6	Ps124536	Ps001466	Ps124536	Ps001466	0.878794	B	B	B	A	B	B	B	A	B	A	-	B	B	A	A	A	B	A	A	-	A	B	A	B	A	A	B	A	A	-	A	B	-	A	B	A	-	A	A	B	B	A
Ps108681	9	11.2	Ps124536	Ps001466	Ps124536	Ps001466	1	B	B	B	A	B	B	B	A	B	A	B	B	B	A	-	A	B	A	A	A	A	B	-	B	A	A	B	A	A	B	A	B	A	A	B	A	A	A	A	B	B	A
Ps126220	9	8.9	Ps124536	Ps001466	Ps124536	W19_900	0.757621	B	B	B	A	B	-	B	A	-	A	B	B	B	A	A	A	B	A	A	A	A	B	A	B	-	A	B	A	A	B	A	B	-	-	B	A	A	A	-	B	A	A
Ps161507	9	9.1	Ps124536	Ps001466	Ps124536	Ps001466	0.41108	B	B	-	A	B	B	B	A	B	-	-	B	B	A	A	A	B	A	-	A	A	B	-	-	A	A	-	-	A	-	A	B	A	A	-	A	A	A	A	B	B	A
Ps121837	9	10.9	Ps124536	Ps001466	Ps124536	Ps001466	0.445766	B	-	-	A	B	B	B	A	B	A	-	B	B	A	A	A	B	A	A	A	A	B	-	B	A	A	B	A	A	B	A	B	A	A	B	A	A	A	A	-	B	A
Ps112213	9	11.2	Ps124536	Ps001466	Ps124536	Ps001466	1	B	B	B	A	B	B	B	A	B	A	B	B	B	A	-	A	B	A	A	A	A	B	-	B	A	A	B	A	A	B	A	-	A	A	B	A	A	A	A	B	B	A
Ps119638	9	10.6	Ps124536	Ps001466	Ps124536	Ps001466	0.445766	B	B	B	-	B	B	B	A	B	A	B	-	B	A	A	A	-	A	A	A	A	B	A	-	A	A	B	A	A	B	A	B	A	A	B	A	A	A	A	B	B	A
Ps156482	9	9.7	Ps124536	Ps001466	Ps124536	Ps001466	0.87278	B	B	B	A	B	B	B	A	B	A	B	B	-	A	A	A	B	A	-	A	A	B	-	-	-	A	B	A	A	B	A	B	A	-	B	A	A	A	-	-	B	A
Ps109254	9.2	10.9	Ps124536	Ps001466	eSSR338-224	Ps001466	1	-	B	B	A	B	B	B	A	B	A	-	B	B	A	A	A	B	A	A	A	A	B	B	B	A	A	B	A	A	B	A	B	-	A	B	A	A	A	A	B	B	-
Ps106842	9.2	10.9	Ps124536	Ps001466	eSSR338-224	Ps001466	0.763025	B	B	B	A	B	B	B	A	B	A	B	B	B	A	A	A	B	A	A	A	A	B	B	B	A	A	B	A	A	B	A	B	-	-	B	-	A	A	A	B	-	A
Ps157143	9.2	9.4	Ps124536	Ps001466	eSSR338-224	Ps900057	0.630954	B	-	B	A	B	B	B	A	B	-	B	-	B	A	A	A	B	A	A	A	A	-	B	B	A	A	-	-	A	B	-	B	A	A	B	A	A	A	A	-	B	A
Ps100626	9.2	11.8	Ps124536	Ps001466	eSSR338-224	Ps001466	0.884028	B	B	B	A	B	B	B	A	B	A	B	B	B	A	A	A	B	A	A	A	A	B	B	B	A	A	B	A	A	B	A	B	A	A	B	A	A	A	A	-	B	A
Ps114128	9.2	10.6	Ps124536	Ps001466	eSSR338-224	Ps001466	0.878794	B	B	B	A	B	B	B	A	-	A	B	B	B	A	A	A	B	-	A	A	A	B	B	B	A	A	B	-	A	B	A	B	A	A	B	A	A	A	A	B	-	A
Ps105778	9.2	11.2	Ps124536	Ps001466	eSSR338-224	Ps001466	0.881497	B	B	B	A	B	B	B	A	B	A	B	B	B	A	A	A	B	A	A	A	A	B	B	B	A	A	B	A	A	B	-	B	A	A	B	A	A	A	A	B	B	A
Ps107270	9.2	10.9	Ps124536	Ps001466	eSSR338-224	Ps001466	1	B	B	B	A	B	B	B	A	B	A	B	B	B	A	A	A	-	A	A	A	A	B	B	B	A	A	B	A	A	B	A	B	A	-	B	A	A	A	A	B	B	A
Ps132582	9.2	10.3	Ps124536	Ps001466	eSSR338-224	Ps001466	1	B	B	B	A	B	B	-	A	B	-	-	B	B	A	A	A	B	A	A	A	A	B	B	B	A	A	B	A	A	B	A	B	A	A	B	A	A	-	A	B	B	A
Ps124225	9.2	10.6	Ps124536	Ps001466	eSSR338-224	Ps001466	0.878794	B	B	B	A	-	B	B	A	B	A	B	B	B	A	A	-	B	A	A	A	A	B	B	B	A	A	B	A	A	B	A	B	A	A	B	A	A	A	-	B	B	A
Ps126645	9.2	10.3	Ps124536	Ps001466	eSSR338-224	Ps001466	0.757621	B	B	B	A	B	-	B	A	-	A	B	B	B	A	-	A	B	A	A	-	A	B	B	-	A	A	B	A	A	B	A	-	A	A	B	A	A	A	A	B	B	A
Ps126434	9.2	10.3	Ps124536	Ps001466	eSSR338-224	Ps900057	1	B	B	B	A	B	B	B	A	B	A	-	-	B	-	A	A	B	A	A	A	A	B	B	B	A	A	-	A	A	B	A	B	-	A	B	A	A	A	A	B	B	A
Ps117964	9.2	10.6	Ps124536	Ps001466	eSSR338-224	Ps001466	0.878794	B	B	B	A	B	B	B	A	B	A	B	B	B	A	-	A	B	A	A	A	-	B	B	B	A	A	B	A	A	B	A	B	A	A	B	A	A	A	-	B	-	A
Ps158022	9.2	9.1	Ps124536	Ps001466	eSSR338-224	Ps001466	1	B	B	B	-	-	B	B	A	B	A	B	B	-	A	A	A	-	A	A	A	A	-	B	B	-	A	B	-	A	B	-	B	A	-	B	A	A	A	A	-	B	A
Ps100066	9.2	12	Ps124536	Ps001466	eSSR338-224	Ps001466	1	B	B	B	A	B	B	B	A	B	A	B	B	B	A	A	A	B	A	A	A	A	B	B	B	A	A	B	A	A	B	A	B	A	A	B	A	A	A	A	B	B	A
Ps149339	9.3	9.7	Ps124536	Ps001466	eSSR338-224	Ps900057	0.75183	B	B	B	-	-	B	B	A	B	-	B	B	-	A	A	A	B	A	A	A	A	-	B	B	A	A	-	A	A	B	A	B	A	-	B	A	A	A	A	B	B	A
Ps148816	9.3	9.7	Ps124536	Ps001466	eSSR338-224	Ps001466	0.75183	-	-	B	A	B	B	B	A	B	A	-	B	B	A	A	A	B	A	A	A	-	-	B	B	A	A	B	A	A	B	A	B	A	A	B	A	A	A	-	B	B	A
Ps001466	9.7						0.66168	B	B	B	A	B	B	B	A	B	A	B	B	B	A	A	A	B	A	A	A	A	B	-	B	A	A	B	A	A	B	A	B	A	A	B	A	A	A	A	B	B	A
Ps001424	9.7	26.5	Ps124536	Ps001466	Ps124536	W19_900	0.66168	B	B	B	A	B	B	B	A	B	A	B	B	B	A	A	A	B	A	A	A	A	B	-	B	A	A	B	A	A	B	A	B	A	A	B	A	A	A	A	B	B	A
Ps001310	9.7	26.2	Ps124536	Ps001466	Ps124536	W19_900	0.66168	B	B	B	A	B	B	B	A	B	A	B	B	B	A	A	A	B	A	A	A	A	B	-	B	A	A	B	A	A	B	A	B	A	A	B	A	A	A	A	B	B	A
Ps147535	9.7	11.7	Ps001466	W19_900	Ps124536	Ps000092	0.75183	-	B	B	A	B	B	B	A	B	A	B	B	B	A	A	A	-	A	A	A	A	B	B	B	A	-	B	-	A	-	A	B	A	-	B	A	A	A	A	B	B	A
Ps148646	9.7	12	Ps001466	W19_900	eSSR338-224	W19_900	1	B	B	B	A	B	B	-	A	B	A	B	B	-	A	-	A	B	A	A	A	A	B	-	B	A	A	B	A	-	B	A	B	A	-	B	A	A	-	A	B	B	A
Ps119915	9.7	12.9	Ps001466	W19_900	eSSR338-224	W19_900	0.878794	-	B	B	A	B	B	B	A	B	A	B	B	B	A	-	A	B	A	A	A	A	B	-	B	A	A	B	A	-	B	A	B	A	A	B	A	A	A	A	B	B	A
Ps123338	9.7	12.9	Ps124536	Ps001466	Ps124536	W19_900	0.878794	B	B	B	A	B	B	B	A	B	A	B	B	B	A	A	A	-	A	A	A	A	B	-	B	A	A	B	A	A	B	A	B	A	A	B	A	A	A	A	B	B	-
Ps153267	9.7	11.7	Ps001466	W19_900	Ps124536	W19_900	0.87278	B	B	B	-	B	B	B	-	B	A	B	B	B	A	-	A	B	-	A	A	A	B	-	B	A	A	B	A	A	B	-	B	A	A	B	A	A	A	A	B	-	A
Ps127243	9.7	12.3	Ps001466	W19_900	Ps124536	Ps900057	0.757621	B	B	B	A	B	B	B	A	B	A	B	-	B	A	A	A	B	A	A	A	A	B	B	B	A	-	B	A	A	-	A	-	A	-	B	A	A	A	A	B	B	A
Ps143395	9.7	12.3	Ps001466	W19_900	eSSR338-224	W19_900	0.875896	B	B	B	A	B	B	B	A	B	A	B	B	B	A	A	A	B	A	A	A	A	B	-	B	A	A	B	A	-	B	A	B	-	A	B	A	A	A	A	-	B	A
Ps144838	9.7	11.7	Ps001466	W19_900	eSSR75-377	W19_900	0.527089	B	-	B	A	B	B	B	A	-	A	-	-	B	-	A	A	B	A	A	A	A	B	A	B	A	A	B	A	-	B	A	B	A	A	B	-	A	A	A	B	B	A
Ps146924	9.7	12	Ps001466	W19_900	Ps124536	W19_900	0.75183	-	B	B	A	B	B	B	A	B	A	B	B	B	A	A	A	B	A	A	A	A	B	-	-	-	A	B	-	A	B	-	B	A	A	B	A	-	A	A	-	B	A
Ps143605	9.7	12.3	Ps001466	W19_900	Ps124536	W19_900	0.43488	B	B	B	A	-	B	B	A	B	A	-	B	B	A	A	A	B	A	A	A	-	B	-	B	A	A	B	A	A	-	A	B	-	A	B	A	A	A	A	B	B	A
Ps114451	9.7	12.9	Ps001466	W19_900	Ps124536	W19_900	0.445766	B	B	B	A	B	B	B	A	B	A	B	-	B	A	A	A	B	A	A	A	A	B	-	B	A	-	B	A	A	B	A	B	A	A	-	A	A	A	A	B	B	A
Ps135939	9.7	12	Ps001466	W19_900	Ps124536	Ps900057	0.639412	B	-	B	A	B	B	B	A	B	A	-	B	B	A	A	A	B	A	A	A	A	B	B	B	A	-	B	A	A	-	A	B	-	-	B	A	A	A	A	B	-	A
Ps118344	9.7	12.6	Ps001466	W19_900	Ps124536	Ps900057	0.878794	B	-	B	A	B	B	B	-	B	A	B	B	B	A	A	A	B	A	A	A	A	B	B	B	-	-	B	A	A	B	A	B	A	-	B	A	A	A	A	B	B	A
Ps134113	9.7	12.6	Ps001466	W19_900	Ps124536	W19_900	0.537094	-	-	B	A	B	B	B	A	B	A	B	B	B	A	A	A	B	A	A	A	-	B	-	B	A	A	B	A	A	B	A	B	A	A	B	A	-	A	A	B	B	A
Ps118626	9.7	12.9	Ps124536	Ps001466	Ps124536	W19_900	0.878794	B	B	B	A	B	B	B	A	B	-	-	B	B	A	A	A	B	A	A	A	A	B	-	B	A	A	B	A	A	B	A	B	A	A	B	A	A	A	A	B	B	A
Ps103282	9.7	13.2	Ps001466	W19_900	Ps124536	Ps900057	0.881497	B	B	B	A	B	B	B	A	B	A	B	B	B	A	A	A	B	A	A	A	A	B	B	B	A	-	B	A	A	B	A	-	-	A	B	A	A	A	A	B	B	A
Ps100368	9.7	14.1	Ps001466	W19_900	Ps124536	W19_900	0.66168	B	B	B	A	B	B	B	A	B	A	B	B	B	A	A	A	B	A	A	A	A	B	-	B	A	A	B	A	A	B	A	B	A	A	B	A	A	A	A	B	B	A
Ps156072	9.7	11.4	Ps001466	W19_900	Ps124536	Ps900057	0.630954	B	-	B	-	B	B	-	-	B	A	B	-	-	A	A	A	B	A	A	A	A	B	B	B	A	A	B	A	A	B	A	B	A	-	B	A	A	A	A	B	B	A
Ps106353	9.7	13.2	Ps001466	W19_900	Ps124536	Ps900057	0.654721	B	B	B	A	B	B	B	-	B	A	B	B	B	A	A	A	B	A	A	A	A	-	B	B	A	A	B	A	A	B	A	B	A	A	B	A	A	A	A	-	B	A
Ps116817	9.7	12.9	Ps001466	W19_900	Ps124536	W19_900	0.878794	B	-	B	A	B	B	B	A	B	A	B	B	B	A	A	A	B	A	A	A	A	B	-	B	-	A	B	A	A	B	A	B	A	-	B	A	A	-	A	B	B	A
Ps140668	9.7	12.3	Ps124536	Ps001466	Ps124536	W19_900	0.639412	-	B	B	A	B	B	-	A	B	A	B	B	B	A	A	A	B	A	-	A	A	B	-	B	A	A	B	A	A	B	A	B	A	-	-	A	A	A	A	B	B	A
Ps109444	9.7	12.9	Ps001466	W19_900	Ps124536	Ps900057	0.546494	B	B	B	A	B	-	B	A	B	A	B	B	B	A	A	-	-	A	A	A	A	B	B	B	A	A	B	A	A	B	A	B	A	A	B	A	A	A	A	B	B	A
Ps119916	9.7	12.6	Ps001466	W19_900	eSSR338-224	Ps900057	0.878794	B	B	B	A	B	B	B	A	B	A	B	B	B	A	A	A	B	A	-	A	A	B	B	B	A	A	B	A	-	B	A	B	A	A	B	-	A	-	A	B	B	A
Ps146840	9.7	11.7	Ps001466	W19_900	Ps124536	Ps000092	0.75183	-	-	B	A	B	B	B	A	B	-	B	B	B	A	-	A	-	A	A	A	A	B	B	B	A	A	B	A	A	B	-	-	A	A	B	A	A	A	-	B	B	A
Ps151811	9.7	11.7	Ps001466	W19_900	eSSR338-224	Ps900057	0.527089	B	B	B	-	B	-	B	A	B	A	B	B	B	A	-	A	B	A	A	-	A	B	B	B	A	A	B	A	A	B	A	B	-	A	B	A	-	A	A	B	B	-
Ps145723	9.7	12	Ps124536	Ps001466	eSSR338-224	W19_900	0.342782	B	B	-	A	B	-	B	A	B	A	B	-	B	A	A	A	-	A	A	A	A	B	-	B	A	A	B	-	-	B	A	B	A	A	-	A	A	A	A	B	B	A
Ps154369	9.7	11.7	Ps001466	W19_900	Ps124536	W19_900	0.630954	B	B	B	A	-	-	B	A	B	A	-	B	B	A	A	A	B	-	A	A	A	B	-	B	A	A	B	A	A	B	A	B	-	A	B	-	A	A	A	B	-	A
Ps114516	9.7	12.6	Ps001466	W19_900	Ps124536	Ps000092	0.647315	-	B	B	A	B	B	B	A	-	A	B	B	B	A	A	A	-	A	A	A	A	B	B	B	-	A	B	A	A	B	A	B	A	-	B	A	A	A	A	B	B	A
Ps109522	9.7	12.9	Ps001466	W19_900	eSSR338-224	Ps900057	0.763025	B	B	B	A	B	B	B	A	B	A	B	B	-	A	A	A	B	A	A	A	A	B	B	B	A	-	B	A	A	B	A	B	A	A	B	A	A	A	A	-	B	A
Ps114976	9.7	12.6	Ps001466	W19_900	eSSR338-224	Ps900057	0.878794	B	B	B	A	B	B	B	A	B	A	B	B	B	A	A	A	-	A	A	A	A	B	B	B	A	A	B	A	A	B	A	B	-	A	B	A	A	A	A	B	-	A
Ps110900	9.7	12.9	Ps001466	W19_900	Ps124536	Ps900057	0.763025	B	B	-	-	B	B	B	A	B	A	B	B	B	A	A	A	B	A	A	A	A	B	B	B	A	A	B	A	A	B	A	B	A	A	B	A	-	A	A	B	B	A
Ps143592	9.7	12.3	Ps001466	W19_900	Ps124536	W19_900	0.875896	B	B	B	A	B	B	B	A	-	A	B	B	B	A	A	A	B	A	A	A	-	B	-	B	-	A	B	-	A	B	A	B	A	A	B	A	-	A	A	B	-	A
Ps132076	9.7	12.3	Ps001466	W19_900	Ps124536	Ps000092	0.757621	-	B	B	-	B	B	B	A	B	A	B	-	B	A	A	A	B	A	-	A	A	-	B	B	A	-	B	A	A	B	A	B	A	A	B	A	A	A	A	B	B	A
Ps152727	9.7	11.7	Ps124536	Ps001466	Ps124536	W19_900	0.630954	B	B	B	A	B	B	B	A	B	A	-	B	B	A	-	-	B	A	A	A	A	B	-	B	A	A	B	-	A	B	A	B	A	-	B	A	A	A	-	B	B	-
Ps112562	9.7	12.9	Ps001466	W19_900	eSSR338-224	Ps900057	0.763025	B	B	B	A	-	B	B	A	B	A	B	B	B	A	A	A	B	-	A	A	A	-	B	B	A	A	B	A	A	B	A	B	A	A	B	A	A	A	A	B	B	A
Ps127001	9.7	12.3	Ps001466	W19_900	eSSR338-224	Ps900057	1	B	B	B	A	-	B	-	A	B	A	B	B	B	A	-	A	B	A	A	-	A	B	B	B	A	A	B	A	-	B	A	B	-	A	B	A	A	A	A	B	B	A
Ps120379	9.7	12.6	Ps001466	W19_900	Ps124536	Ps900057	0.445766	B	-	B	A	B	B	B	A	B	A	B	B	B	A	A	A	B	-	A	A	A	-	B	B	A	A	B	A	A	B	A	B	A	A	B	A	A	A	A	B	B	A
Ps138813	9.7	12.3	Ps124536	Ps001466	Ps124536	W19_900	0.875896	B	B	B	A	B	B	B	A	B	-	B	B	-	A	A	-	B	A	A	A	A	B	-	B	A	A	B	A	A	B	A	B	-	A	B	A	-	A	A	B	B	A
Ps134269	9.7	12.6	Ps124536	Ps001466	Ps124536	W19_900	1	B	B	B	A	B	B	B	A	B	A	B	B	B	A	-	A	B	A	A	A	A	B	-	B	A	A	B	A	A	B	A	B	A	A	B	A	A	A	A	B	B	-
Ps144350	9.7	12.3	Ps001466	W19_900	Ps124536	W19_900	0.875896	B	B	B	A	B	-	B	A	B	A	B	B	B	A	A	A	B	A	-	A	A	-	-	B	A	A	B	-	A	B	A	B	A	-	B	A	A	A	A	B	B	-
Ps117554	9.7	12.6	Ps001466	W19_900	eSSR338-224	Ps900057	0.647315	B	B	B	A	B	B	B	A	B	A	B	-	B	A	A	A	B	A	-	A	A	B	B	B	A	A	B	A	A	B	A	B	A	A	B	A	A	A	A	-	B	A
Ps109971	9.7	12.9	Ps001466	W19_900	eSSR338-224	Ps900057	1	B	B	-	A	B	B	B	A	B	A	B	B	B	A	A	A	B	A	-	A	A	B	B	B	A	A	B	A	A	B	A	B	A	-	B	A	A	A	A	B	B	A
Ps134082	9.7	12.6	Ps001466	W19_900	eSSR338-224	W19_900	0.757621	B	B	B	A	B	B	B	A	B	-	B	B	B	A	A	A	-	A	A	A	A	-	-	B	A	A	B	A	-	B	A	B	A	A	B	A	A	A	A	B	B	A
Ps118184	9.7	12.6	Ps001466	W19_900	Ps124536	Ps900057	0.445766	B	B	B	A	B	B	B	A	-	A	-	B	B	A	A	A	-	A	A	A	A	B	B	-	A	A	B	A	A	B	A	B	A	-	B	A	A	A	A	B	B	A
Ps103746	9.7	13.2	Ps001466	W19_900	Ps124536	Ps900057	0.654721	B	-	B	A	B	B	B	A	B	A	B	B	B	A	A	A	B	A	A	A	-	B	B	B	A	A	B	A	A	B	A	B	A	A	B	A	A	A	A	B	B	A
Ps155558	9.7	11.7	Ps001466	W19_900	Ps124536	W19_900	0.630954	B	-	B	A	-	B	B	A	B	A	B	-	B	A	A	A	B	A	A	A	-	B	-	-	A	A	B	A	A	B	A	B	-	A	B	-	A	A	A	B	B	-
Ps117386	9.7	12.9	Ps001466	W19_900	Ps124536	W19_900	0.878794	-	B	B	A	B	B	B	A	B	-	B	B	B	A	A	A	B	A	A	A	A	B	-	B	A	A	B	A	A	B	A	B	A	A	B	-	-	A	A	B	B	A
Ps137502	9.7	12.3	Ps124536	Ps001466	Ps124536	W19_900	0.875896	B	B	B	A	B	B	B	A	B	-	B	B	B	A	A	A	-	A	A	A	A	B	-	B	A	A	B	A	A	B	A	B	A	A	B	-	A	A	-	B	B	A
Ps127739	9.7	12.3	Ps001466	W19_900	Ps124536	Ps900057	0.354539	B	B	B	-	B	-	B	A	B	A	-	B	B	A	A	A	-	A	A	A	A	B	B	B	A	A	B	A	A	B	A	B	A	A	-	A	A	A	A	B	B	A
Ps101532	9.7	13.8	Ps001466	W19_900	Ps124536	W19_900	0.768083	B	B	B	A	B	B	B	A	B	A	B	B	B	A	A	A	B	A	A	A	A	B	-	B	A	A	B	A	A	B	A	B	A	A	B	A	A	A	-	B	B	A
Ps120025	9.7	12.6	Ps001466	W19_900	Ps124536	Ps900057	0.878794	B	B	B	-	-	B	B	A	B	A	B	B	B	A	-	A	B	A	A	A	A	B	B	B	A	A	B	A	A	B	A	B	A	A	B	A	A	A	-	B	B	-
Ps132178	9.7	12.6	Ps001466	W19_900	eSSR338-224	W19_900	1	B	B	B	A	B	B	B	A	B	A	B	B	B	A	A	A	B	A	A	A	A	B	-	B	A	A	B	A	-	-	A	B	A	A	B	A	A	-	A	B	B	A
Ps121965	9.7	12.9	Ps001466	W19_900	Ps124536	W19_900	0.647315	B	B	B	-	B	B	B	-	B	A	B	B	B	A	A	A	B	A	A	A	A	B	-	B	A	A	B	A	A	-	A	B	A	A	B	A	A	A	A	B	B	A
Ps114407	9.7	12.6	Ps001466	W19_900	Ps124536	Ps900057	0.878794	B	B	B	A	B	B	B	A	B	-	B	B	-	A	A	A	B	A	-	A	A	B	B	B	-	A	B	A	A	B	A	B	A	-	B	A	A	A	A	B	B	A
Ps146699	9.7	12	Ps001466	W19_900	Ps124536	W19_900	0.527089	B	B	-	A	B	-	B	A	B	A	B	B	B	A	-	A	B	A	A	A	A	B	-	B	A	A	B	A	A	B	A	B	A	A	B	A	A	A	-	B	B	A
Ps106949	9.7	12.9	Ps001466	W19_900	eSSR338-224	Ps900057	0.763025	B	B	B	-	B	B	B	A	B	A	B	B	B	A	-	A	B	A	A	A	A	B	B	B	A	A	B	A	-	B	A	B	A	-	B	A	A	A	A	B	B	A
Ps148017	9.7	12	Ps124536	Ps001466	eSSR338-224	W19_900	0.75183	B	B	B	-	B	-	B	A	B	A	B	B	B	A	A	-	B	A	A	A	A	-	-	B	A	-	B	A	-	B	A	B	A	A	B	A	A	A	A	-	B	A
Ps118109	9.7	12.9	Ps001466	W19_900	Ps124536	W19_900	0.878794	B	B	B	A	B	B	B	A	B	A	B	B	B	A	A	A	B	-	A	A	A	B	-	B	A	A	B	A	A	B	-	B	A	A	B	A	A	A	-	B	B	A
Ps139760	9.7	12.3	Ps001466	W19_900	Ps124536	W19_900	0.43488	B	B	B	A	B	B	B	A	B	A	-	B	B	A	A	A	-	A	A	A	A	B	-	B	A	A	B	A	A	B	A	B	A	-	B	A	A	A	-	-	B	A
Ps113523	9.7	12.9	Ps001466	W19_900	Ps124536	Ps900057	1	B	B	B	A	B	B	B	A	B	A	B	B	B	A	A	A	B	A	-	A	A	B	B	B	A	A	B	A	A	B	A	B	-	A	B	A	A	A	A	B	B	A
Ps108018	9.7	12.9	Ps001466	W19_900	Ps124536	Ps000092	0.546494	-	B	-	A	B	B	B	A	B	A	B	B	B	-	A	A	B	A	A	A	A	B	B	B	A	A	B	A	A	B	A	B	A	A	-	A	A	A	A	B	B	A
Ps118418	9.7	12.9	Ps001466	W19_900	Ps124536	W19_900	0.445766	B	B	B	A	-	B	-	A	B	A	B	B	B	A	A	A	B	A	A	A	A	B	-	B	-	A	B	A	A	B	A	B	A	A	-	A	A	A	A	B	B	A
Ps115594	9.7	12.6	Ps001466	W19_900	Ps124536	W19_900	0.647315	B	B	B	A	B	B	B	A	B	-	B	B	B	A	A	A	B	A	A	A	A	B	A	-	A	A	B	A	A	B	A	B	A	-	B	-	A	A	A	B	B	A
Ps138649	9.7	12.3	Ps001466	W19_900	eSSR338-224	W19_900	0.639412	B	B	B	A	B	B	B	A	B	A	B	B	-	A	A	-	-	A	A	A	A	B	-	B	A	A	B	A	-	B	A	B	A	A	B	A	A	A	A	B	-	A
Ps115374	9.7	12.6	Ps001466	W19_900	eSSR338-224	Ps900057	0.647315	B	B	B	A	B	B	B	A	B	A	B	-	B	A	-	A	B	A	A	A	A	B	B	B	A	A	B	A	-	B	A	B	A	A	B	A	A	A	A	-	-	A
Ps107200	9.7	12.9	Ps001466	W19_900	Ps124536	Ps900057	1	B	B	B	-	B	B	B	A	B	A	B	B	B	A	A	A	B	-	A	A	A	B	B	B	A	A	B	A	A	B	A	B	-	A	-	A	A	A	A	B	B	A
Ps131355	9.7	12.6	Ps124536	Ps001466	Ps124536	W19_900	0.537094	B	B	B	A	B	B	B	A	B	A	-	B	B	A	A	A	B	A	A	A	A	B	-	-	A	A	B	A	A	B	A	B	A	A	B	A	A	A	A	B	B	A
Ps130678	9.7	12.3	Ps001466	W19_900	eSSR338-224	Ps900057	0.537094	B	B	B	-	B	B	B	A	B	A	-	-	B	A	A	A	-	A	A	A	A	B	B	B	A	A	B	A	A	B	A	-	A	A	B	A	A	A	A	B	B	A
Ps118223	9.7	12.6	Ps001466	W19_900	Ps124536	Ps000092	0.647315	-	B	B	A	B	B	B	A	B	A	B	B	B	A	-	A	B	A	A	-	A	B	B	-	A	A	B	A	A	B	A	-	A	A	B	A	A	A	A	B	B	A
Ps121903	9.7	12.6	Ps001466	W19_900	Ps124536	Ps000092	0.647315	-	-	B	A	-	B	B	A	B	A	B	B	B	A	A	A	B	-	A	A	A	B	B	B	A	A	B	A	A	B	A	B	A	A	B	-	A	A	A	B	B	A
Ps143429	9.7	12	Ps001466	W19_900	eSSR338-224	Ps900057	0.875896	B	B	B	A	B	-	B	A	B	A	B	B	B	A	A	A	B	A	A	A	A	B	B	B	-	A	B	-	A	B	-	B	A	A	-	A	A	A	A	B	B	A
Ps155635	9.7	11.7	Ps124536	Ps001466	Ps124536	W19_900	0.630954	B	-	B	A	B	B	B	A	-	A	B	B	B	A	A	A	B	-	A	A	-	B	-	B	A	A	B	A	A	B	A	B	-	A	B	A	A	A	A	B	-	A
Ps113187	9.7	13.2	Ps001466	W19_900	Ps124536	W19_900	1	B	B	B	A	B	B	B	A	B	A	B	B	B	A	A	A	B	A	A	A	A	B	-	B	A	A	B	A	A	B	-	B	A	-	B	A	A	-	A	B	B	A
Ps123490	9.7	12.9	Ps124536	Ps001466	Ps124536	W19_900	0.878794	B	-	B	A	B	B	B	-	B	A	B	B	B	A	A	A	B	-	A	A	A	B	-	B	A	A	B	A	A	B	A	B	A	A	B	A	A	A	A	B	B	A
Ps139622	9.7	12.3	Ps001466	W19_900	Ps124536	W19_900	0.639412	B	B	-	A	B	-	-	A	B	A	B	B	B	A	A	A	B	A	A	A	A	B	-	B	A	-	B	-	A	B	A	B	-	A	B	A	A	A	A	B	B	A
Ps155381	9.7	11.7	Ps001466	W19_900	eSSR338-224	W19_900	0.630954	B	B	B	A	B	B	B	A	-	A	-	B	B	A	A	A	B	A	A	A	A	B	-	-	A	A	B	A	-	B	A	B	A	A	B	A	A	A	-	B	-	A
Ps144539	9.7	12.3	Ps124536	Ps001466	Ps124536	W19_900	0.43488	B	B	B	-	-	-	B	A	B	A	B	B	B	A	A	A	B	A	A	A	A	B	-	B	A	A	B	A	A	-	A	B	A	A	B	A	A	A	A	B	B	A
Ps107191	9.7	12.9	Ps001466	W19_900	Ps124536	Ps900057	0.546494	B	B	B	A	B	B	B	A	B	A	B	B	B	A	A	A	-	A	A	A	A	-	B	B	A	A	B	A	A	B	A	B	-	A	B	A	A	A	A	B	B	A
Ps135252	9.7	12	Ps001466	W19_900	Ps124536	W19_900	0.875896	B	B	B	A	B	B	B	A	-	-	B	B	B	A	A	-	-	A	A	A	A	B	A	B	A	-	B	A	A	B	-	B	A	A	B	-	A	A	A	B	B	A
Ps154608	9.7	11.7	Ps001466	W19_900	Ps124536	W19_900	0.630954	B	B	B	-	B	-	B	A	B	-	B	-	B	A	-	A	B	A	A	A	A	B	-	B	A	A	B	A	A	B	A	B	A	A	-	-	A	A	A	B	B	A
Ps145532	9.7	11.7	Ps124536	Ps001466	eSSR338-224	W19_900	1	B	B	B	-	B	B	B	A	B	-	B	-	B	A	A	A	B	A	A	A	-	B	A	B	-	A	B	A	-	-	A	B	A	-	B	A	A	A	A	B	B	A
Ps115274	9.7	12.9	Ps124536	Ps001466	eSSR338-224	W19_900	0.647315	-	B	B	A	B	B	B	A	B	A	-	B	B	A	A	A	B	A	A	A	A	B	-	B	A	A	B	A	-	B	A	B	A	A	B	-	A	A	A	B	B	A
Ps129115	9.7	12.3	Ps124536	Ps001466	Ps124536	W19_900	0.537094	B	B	B	A	B	B	B	A	B	-	-	B	B	A	A	A	B	A	A	A	A	B	A	B	A	-	B	A	A	B	A	-	A	A	B	A	A	A	A	-	B	A
Ps154482	9.7	11.7	Ps124536	Ps001466	eSSR338-224	W19_900	0.87278	B	B	B	A	B	B	B	A	B	-	B	B	B	-	-	A	B	A	A	A	-	B	-	-	A	A	B	A	-	B	A	B	A	A	B	A	A	A	A	B	-	A
Ps110452	9.7	12.9	Ps001466	W19_900	eSSR338-224	Ps900057	1	B	B	B	A	B	B	-	A	B	A	B	B	B	A	A	A	B	A	A	A	A	B	B	B	A	A	B	A	A	B	A	B	A	A	B	A	A	-	A	B	B	A
Ps145039	9.7	12	Ps001466	W19_900	Ps124536	W19_900	1	B	B	B	A	B	B	B	A	B	A	B	B	B	A	A	A	B	-	A	A	A	B	-	-	A	A	B	A	A	B	A	B	-	A	-	-	-	A	-	B	B	A
Ps124868	9.7	12.6	Ps124536	Ps001466	eSSR338-224	W19_900	0.757621	B	B	B	A	B	B	B	A	B	A	B	-	-	-	A	A	B	A	A	A	A	B	-	B	A	A	B	A	-	B	A	B	-	A	B	A	A	A	A	B	B	A
Ps155253	9.7	11.7	Ps001466	W19_900	eSSR338-224	W19_900	0.87278	B	B	B	A	-	B	B	A	B	A	B	B	B	A	A	A	B	A	A	A	A	-	-	B	-	A	B	A	-	B	A	B	A	A	B	A	-	A	A	B	-	A
Ps155990	9.7	11.7	Ps124536	Ps001466	Ps124536	W19_900	0.87278	B	B	B	-	B	B	B	A	B	A	-	B	B	A	-	A	B	-	A	A	A	B	-	B	A	A	B	A	A	B	-	B	A	A	B	A	A	A	-	B	B	A
Ps109328	9.7	12.9	Ps001466	W19_900	eSSR338-224	Ps900057	0.546494	B	B	B	A	B	-	B	A	B	A	B	B	B	A	A	A	B	A	A	A	A	B	B	B	A	A	B	A	A	-	A	B	A	A	B	A	A	A	A	B	-	A
Ps135391	9.7	12	Ps001466	W19_900	Ps124536	Ps900057	0.639412	B	B	B	A	B	-	B	A	B	A	B	B	B	-	A	A	-	A	A	A	A	B	B	B	-	A	B	A	A	B	-	B	A	A	B	A	A	A	A	-	B	A
Ps122438	9.7	12.9	Ps124536	Ps001466	Ps124536	W19_900	0.878794	-	B	B	A	B	B	B	A	B	A	B	B	B	A	A	A	B	A	A	-	A	B	-	B	A	A	B	A	A	B	A	B	A	A	B	A	A	A	A	B	B	A
Ps129795	9.7	12.3	Ps124536	Ps001466	eSSR338-224	W19_900	1	B	B	B	A	B	B	B	A	B	A	B	-	B	A	A	A	B	A	A	-	A	B	A	B	A	A	B	A	-	B	A	B	-	A	B	A	A	A	-	B	B	-
Ps138930	9.7	12.3	Ps001466	W19_900	Ps124536	W19_900	0.43488	B	-	B	A	B	B	B	A	-	A	B	B	B	A	A	A	B	A	-	A	-	B	-	B	A	A	B	A	A	B	A	B	A	A	B	A	A	A	A	-	-	A
Ps152505	9.7	11.7	Ps001466	W19_900	Ps124536	W19_900	0.630954	B	B	B	A	B	B	B	-	B	A	B	B	B	A	A	A	-	A	A	-	A	B	-	B	A	A	B	A	A	-	-	B	A	-	-	A	A	A	A	B	-	A
Ps133930	9.7	12.6	Ps001466	W19_900	Ps124536	W19_900	0.537094	B	B	B	A	-	B	B	A	B	A	B	-	B	A	A	A	B	A	A	A	A	B	-	-	A	A	B	A	A	B	A	B	A	A	B	A	-	A	-	B	B	A
Ps141717	9.7	12.3	Ps001466	W19_900	Ps124536	W19_900	0.875896	B	B	B	A	B	-	B	A	B	A	B	B	B	A	A	A	B	A	A	A	-	B	-	-	A	A	B	A	A	B	A	B	A	A	B	A	-	A	-	B	B	A
Ps147450	9.7	11.7	Ps001466	W19_900	Ps124536	W19_900	0.342782	B	B	-	A	B	B	B	A	-	A	B	B	B	A	A	A	B	-	A	A	A	B	A	B	A	A	B	A	A	-	A	B	-	-	B	A	A	A	A	B	-	A
Ps131576	9.7	12.6	Ps001466	W19_900	Ps124536	W19_900	1	-	B	B	A	B	B	B	A	B	-	B	B	B	A	-	A	B	A	A	-	A	B	-	B	A	A	B	A	A	B	A	B	A	A	B	-	A	A	A	B	B	A
Ps131854	9.7	12.3	Ps001466	W19_900	eSSR338-224	Ps900057	1	B	B	B	A	B	B	B	A	B	A	B	-	B	A	A	A	B	A	A	-	A	B	B	B	A	A	B	-	A	B	A	B	A	A	B	A	A	A	-	B	-	A
Ps158610	9.7	11.4	Ps001466	W19_900	Ps124536	W19_900	0.516412	B	B	B	A	B	B	B	A	B	A	B	B	B	A	A	A	B	A	-	A	-	B	-	B	A	A	B	A	A	B	A	-	-	-	B	-	A	-	-	B	B	A
Ps101218	9.7	13.5	Ps001466	W19_900	Ps124536	Ps900057	1	B	B	B	-	B	B	B	A	B	A	B	B	B	A	A	A	B	A	A	A	A	B	B	B	A	A	B	A	A	B	A	B	A	-	B	A	A	A	A	B	B	A
Ps130471	9.7	12.3	Ps001466	W19_900	Ps124536	Ps900057	0.537094	B	B	B	A	-	-	B	A	-	A	B	B	B	-	A	A	B	A	A	A	A	B	B	B	A	A	B	A	A	B	A	B	A	A	B	A	A	-	A	B	B	A
Ps159250	9.7	11.4	Ps001466	W19_900	eSSR338-224	W19_900	1	B	B	B	A	B	B	B	-	-	A	B	B	B	A	A	-	B	A	A	A	-	B	-	B	A	A	B	A	-	-	A	B	A	A	-	A	A	A	-	B	B	A
Ps143815	9.7	12.3	Ps001466	W19_900	Ps124536	W19_900	0.639412	B	-	B	A	B	B	B	-	B	A	B	B	B	A	A	A	B	A	A	A	A	B	-	-	A	A	B	A	A	B	A	B	-	A	B	-	A	A	A	B	B	A
Ps162836	9.7	10.8	Ps001466	W19_900	Ps124536	W19_900	0.182422	B	-	-	A	B	-	B	A	B	-	B	-	-	A	-	A	B	A	A	A	A	-	-	-	A	A	B	A	A	B	A	B	A	A	-	A	A	A	A	B	B	A
Ps118942	9.7	12.9	Ps001466	W19_900	Ps124536	W19_900	0.445766	B	-	B	A	B	-	-	-	B	A	B	B	B	A	A	A	B	A	A	A	A	B	-	B	A	A	B	A	A	B	A	B	A	A	B	A	A	A	A	B	B	A
Ps152091	9.7	12	Ps124536	Ps001466	Ps124536	W19_900	0.527089	B	B	B	A	B	B	-	A	B	A	B	B	B	A	A	A	B	A	A	A	A	-	-	-	A	A	B	-	A	B	A	B	A	A	B	A	A	-	A	B	B	A
Ps108402	9.7	13.2	Ps001466	W19_900	Ps124536	W19_900	0.365712	B	B	B	A	B	B	B	A	B	A	-	B	B	A	A	A	-	A	A	A	A	B	-	B	A	A	B	A	A	B	A	B	A	A	B	A	A	A	A	B	B	A
Ps117171	9.7	12.9	Ps124536	Ps001466	Ps124536	W19_900	0.878794	B	B	B	A	B	-	B	A	B	A	B	B	B	A	A	A	B	A	A	A	A	B	-	B	-	A	B	A	A	B	A	B	A	A	B	A	A	A	A	B	B	A
Ps114010	9.7	12.9	Ps001466	W19_900	Ps124536	Ps000092	0.763025	-	B	B	A	B	B	B	A	B	A	B	B	B	A	A	-	B	A	A	A	-	B	B	B	A	A	B	A	A	B	A	B	A	A	B	A	A	A	A	B	-	A
Ps119059	9.7	12.9	Ps001466	W19_900	Ps124536	W19_900	0.878794	B	B	-	A	B	B	B	A	B	A	B	B	B	A	A	A	B	A	A	A	A	B	-	B	A	-	B	A	A	B	A	B	A	A	B	A	A	A	A	B	B	-
Ps148998	9.7	12	Ps124536	Ps001466	Ps124536	W19_900	1	B	B	-	A	B	B	B	A	B	A	B	B	-	A	A	A	B	-	-	A	A	B	-	B	A	A	B	A	A	B	-	B	A	A	B	A	A	A	A	B	B	-
Ps100976	9.7	13.5	Ps001466	W19_900	Ps124536	Ps900057	1	B	B	B	A	B	B	B	A	B	A	B	B	B	A	A	A	B	A	A	-	A	B	B	B	A	A	B	A	A	B	A	B	A	A	B	A	A	A	A	B	B	A
Ps157178	9.7	11.4	Ps001466	W19_900	eSSR338-224	Ps000092	0.87278	-	B	B	A	B	B	B	A	B	A	-	B	B	A	A	A	B	A	A	A	A	B	B	B	A	A	B	-	-	B	A	-	-	-	B	A	A	A	A	B	B	A
Ps107521	9.7	13.2	Ps001466	W19_900	Ps124536	W19_900	0.546494	B	B	B	A	B	B	B	A	B	A	B	B	B	A	A	A	-	A	A	A	A	B	-	B	A	-	B	A	A	B	A	B	A	A	-	A	A	A	A	B	B	A
Ps148952	9.7	12	Ps001466	W19_900	Ps124536	W19_900	0.75183	-	B	B	A	B	B	B	A	B	A	B	B	B	A	A	A	B	A	A	A	A	-	-	B	A	A	B	A	A	B	-	-	A	A	B	-	-	A	A	B	B	A
Ps118255	9.7	12.9	Ps001466	W19_900	Ps124536	W19_900	0.878794	B	B	B	A	B	B	B	A	B	A	B	B	B	A	A	-	B	A	A	A	A	B	-	B	A	A	B	A	A	B	A	B	A	-	B	A	A	-	A	B	B	A
Ps119180	9.7	12.9	Ps001466	W19_900	Ps124536	W19_900	0.647315	B	B	B	A	B	B	B	A	B	A	B	B	B	A	A	-	B	A	A	A	A	B	-	B	A	A	B	A	A	B	-	B	A	A	B	A	A	A	A	B	B	A
Ps121131	9.7	12.9	Ps001466	W19_900	Ps124536	W19_900	0.445766	B	B	-	-	-	B	B	A	B	A	B	B	B	A	A	A	-	A	A	A	A	B	-	B	A	A	B	A	A	B	A	B	A	A	B	A	A	A	A	B	B	A
Ps137909	9.7	12.3	Ps124536	Ps001466	eSSR338-224	W19_900	0.639412	B	B	B	A	B	B	B	A	-	A	-	B	B	A	A	A	B	A	-	A	A	B	-	B	A	A	B	A	-	B	A	B	A	-	B	A	A	A	A	-	B	A
Ps154759	9.7	11.4	Ps001466	W19_900	eSSR338-224	Ps900057	0.630954	B	B	B	-	B	B	B	A	B	-	B	B	B	A	A	A	B	A	-	-	A	B	B	B	A	-	B	A	A	B	A	B	A	A	-	A	A	A	A	B	-	A
Ps149784	9.7	11.7	Ps001466	W19_900	eSSR338-224	Ps900057	0.75183	B	B	B	A	B	B	-	A	B	A	B	B	B	A	-	A	B	A	A	A	A	B	B	-	-	-	B	A	-	B	-	B	A	-	B	A	A	A	A	B	B	A
Ps162855	9.7	10.8	Ps001466	W19_900	eSSR338-224	W19_900	0.738883	B	B	-	A	B	B	B	A	B	A	B	-	B	A	A	A	B	A	-	A	A	B	-	B	A	A	B	-	-	B	A	B	A	-	-	A	-	-	-	B	B	A
Ps151851	9.7	11.7	Ps001466	W19_900	eSSR338-224	Ps900057	0.75183	B	B	B	A	B	B	B	A	B	A	B	B	-	A	A	A	B	A	A	A	-	-	B	B	-	A	B	A	A	B	-	B	-	A	B	A	A	A	A	B	B	A
Ps126090	9.7	12.6	Ps124536	Ps001466	eSSR338-224	W19_900	0.757621	B	B	B	A	B	B	B	-	B	A	B	B	B	A	A	A	B	A	A	A	A	B	-	B	A	A	B	A	-	B	-	B	A	-	B	A	A	A	A	B	B	A
Ps104283	9.7	13.5	Ps001466	W19_900	Ps124536	W19_900	0.456057	B	B	B	A	B	B	B	A	B	A	B	B	-	A	A	A	-	A	A	A	A	B	-	B	A	A	B	A	A	B	A	B	A	A	B	A	A	A	A	B	B	A
Ps157770	9.7	11.1	Ps001466	W19_900	eSSR338-224	Ps900057	0.745603	B	B	B	-	B	B	B	A	B	A	-	-	B	A	A	A	-	A	-	A	-	B	B	B	A	A	B	A	-	-	A	B	A	-	B	A	A	A	A	-	B	A
Ps111965	9.7	13.2	Ps001466	W19_900	Ps124536	W19_900	0.546494	B	B	-	A	B	B	B	A	-	A	B	B	B	A	A	A	B	A	A	A	A	B	-	B	A	A	B	A	A	B	A	B	-	A	B	A	A	A	A	B	B	A
Ps105008	9.7	13.5	Ps001466	W19_900	Ps124536	W19_900	0.654721	B	B	B	A	B	-	B	A	B	A	B	B	B	A	A	A	B	A	A	A	A	B	-	B	A	A	B	A	A	B	A	B	A	A	B	A	A	A	A	B	B	A
Ps118713	9.7	12.6	Ps124536	Ps001466	eSSR338-224	W19_900	0.647315	-	B	B	A	B	B	B	A	B	A	B	B	B	A	A	A	B	A	A	A	A	B	A	B	A	A	B	-	-	B	A	B	A	A	-	A	-	A	A	B	B	A
Ps145473	9.7	12	Ps001466	W19_900	Ps124536	W19_900	0.75183	B	B	B	-	B	B	B	A	B	A	B	B	B	A	A	A	B	-	A	A	A	B	-	B	A	-	B	A	A	B	A	B	A	-	B	-	A	A	A	B	B	A
Ps122986	9.7	12.6	Ps001466	W19_900	Ps124536	Ps900057	0.647315	B	B	B	A	B	B	B	A	B	A	B	B	B	-	A	A	B	-	A	-	-	B	B	B	A	A	B	A	A	B	A	B	A	A	B	A	-	A	A	B	B	A
Ps121498	9.7	12.9	Ps001466	W19_900	Ps124536	W19_900	0.878794	B	B	B	A	B	B	B	A	B	A	B	B	B	A	A	A	B	A	A	A	-	B	-	B	-	A	B	A	A	-	A	B	A	A	B	A	A	A	-	B	B	A
Ps153023	9.7	11.7	Ps001466	W19_900	eSSR338-224	W19_900	0.42334	B	-	B	A	-	B	B	A	B	A	B	B	B	A	A	A	-	A	A	A	A	-	-	B	A	A	B	A	-	B	A	B	A	-	B	A	A	A	A	-	B	A
Ps141624	9.7	12	Ps001466	W19_900	Ps124536	Ps900057	0.875896	B	B	B	A	B	-	B	A	B	-	B	-	B	A	A	A	-	A	A	A	A	B	B	B	A	-	B	-	A	B	A	B	A	A	B	A	A	A	A	B	B	A
Ps116311	9.7	12.9	Ps124536	Ps001466	Ps124536	W19_900	0.647315	B	B	B	A	-	B	B	A	B	A	B	B	B	A	A	A	B	A	A	A	A	B	-	B	A	A	B	A	A	B	A	B	A	A	-	A	A	A	A	B	B	A
Ps129679	9.7	12.3	Ps001466	W19_900	eSSR338-224	Ps900057	1	B	B	B	A	B	B	B	A	B	A	-	B	B	A	A	-	B	A	A	A	A	B	B	B	A	A	B	A	A	B	-	B	-	A	B	A	A	A	A	B	B	A
Ps135379	9.7	12	Ps001466	W19_900	Ps124536	Ps900057	0.43488	B	B	B	-	B	B	B	A	B	A	B	B	B	A	A	A	B	A	A	A	-	B	B	B	A	A	B	-	A	B	-	B	-	A	B	A	-	A	-	B	B	A
Ps137322	9.7	12.3	Ps001466	W19_900	Ps124536	W19_900	0.639412	B	B	B	A	B	B	B	A	B	A	B	B	B	A	A	A	B	-	A	A	A	B	-	-	A	A	B	A	A	B	A	B	A	-	B	A	A	A	A	-	B	-
Ps128995	9.7	12.3	Ps001466	W19_900	eSSR338-224	Ps900057	0.757621	B	B	B	A	B	B	B	A	B	A	B	B	B	A	A	A	B	A	A	A	A	B	B	B	A	A	B	A	-	-	-	B	A	-	B	A	A	A	A	-	B	A
Ps149379	9.7	12	Ps124536	Ps001466	Ps124536	W19_900	0.75183	B	B	B	A	-	B	B	A	B	A	B	B	B	A	A	-	B	A	A	A	A	B	-	B	A	A	B	A	A	-	-	B	A	A	-	A	A	A	A	B	B	A
Ps161242	9.7	11.1	Ps124536	Ps001466	eSSR338-224	W19_900	0.621873	B	B	-	A	B	B	B	A	-	A	B	B	B	A	A	A	B	A	A	A	A	B	-	B	A	A	B	A	-	-	A	B	A	-	B	A	-	-	A	-	B	A
Ps104364	9.7	13.5	Ps001466	W19_900	Ps124536	W19_900	0.881497	B	B	B	A	B	B	B	A	B	A	B	B	B	-	A	A	B	A	A	A	A	B	-	B	A	A	B	A	A	B	A	B	A	A	B	A	A	A	-	B	B	A
Ps155394	9.7	11.4	Ps124536	Ps001466	Ps124536	W19_900	0.630954	B	B	B	A	B	B	B	A	B	A	B	B	-	-	A	-	-	A	A	-	-	B	A	-	A	A	B	A	A	B	A	B	A	A	B	A	A	A	A	B	B	A
Ps157730	9.7	11.4	Ps124536	Ps001466	eSSR338-224	W19_900	0.745603	B	B	B	-	B	B	-	A	-	A	-	-	B	A	A	A	B	A	A	A	A	B	-	B	-	A	B	A	-	B	-	B	A	A	B	A	A	-	A	B	B	A
Ps142087	9.7	12.3	Ps124536	Ps001466	eSSR338-224	W19_900	0.43488	B	B	B	A	B	B	B	A	B	A	-	-	B	-	A	A	B	A	A	A	A	B	-	B	A	A	B	A	-	B	A	B	A	A	B	A	A	A	A	-	B	A
Ps108575	9.7	12.9	Ps001466	W19_900	eSSR338-224	Ps900057	1	B	B	B	A	B	B	B	A	B	A	B	B	B	A	A	A	B	A	A	-	A	-	B	B	A	A	B	A	A	B	A	B	-	A	B	A	A	A	A	B	B	A
Ps107422	9.7	12.9	Ps001466	W19_900	Ps124536	W19_900	1	B	B	B	-	B	B	B	A	B	A	B	B	B	A	A	-	B	-	A	A	A	B	A	B	A	A	B	-	A	B	A	B	A	A	B	A	A	A	A	B	B	A
Ps102191	9.7	13.8	Ps124536	Ps001466	Ps124536	W19_900	0.768083	B	B	B	A	B	B	B	A	B	A	B	B	B	A	A	A	B	A	A	A	A	B	-	B	A	A	B	A	A	B	A	B	A	A	B	A	A	A	A	B	B	A
Ps162027	9.7	10.8	Ps124536	Ps001466	eSSR338-224	W19_900	0.621873	-	B	-	A	B	B	B	A	B	A	B	B	-	A	A	A	B	-	A	A	-	B	A	B	A	-	B	A	-	-	A	B	A	A	B	A	A	-	A	B	-	A
Ps156157	9.7	11.7	Ps124536	Ps001466	Ps124536	W19_900	0.630954	B	B	B	A	-	B	B	A	B	A	B	B	B	A	-	A	B	A	A	A	A	B	-	B	A	A	B	A	A	B	A	-	-	A	B	A	A	-	A	-	-	A
Ps132486	9.7	12.3	Ps001466	W19_900	eSSR338-224	Ps900057	0.757621	B	B	B	A	B	B	B	A	B	A	B	B	-	A	A	A	-	-	A	A	A	-	B	B	A	A	B	A	A	B	A	B	A	A	B	-	A	A	A	B	B	A
Ps102090	9.7	13.8	Ps124536	Ps001466	Ps124536	W19_900	0.768083	B	B	B	A	B	B	B	A	B	A	B	B	B	A	A	A	B	A	A	A	A	B	-	B	A	A	B	A	A	B	A	B	A	A	B	A	A	A	A	B	B	A
Ps149770	9.7	12	Ps124536	Ps001466	Ps124536	W19_900	1	B	B	B	-	B	B	B	A	B	A	B	B	B	-	A	-	B	A	A	A	A	B	-	-	-	A	B	A	A	B	A	B	A	A	B	A	A	A	A	B	-	A
Ps162213	9.7	11.1	Ps001466	W19_900	eSSR338-224	W19_900	0.621873	-	B	B	A	-	B	B	A	-	A	B	B	B	A	A	A	-	A	A	A	A	B	-	B	-	A	B	A	-	B	A	B	A	-	B	-	A	A	A	B	B	A
Ps147758	9.7	12	Ps001466	W19_900	Ps124536	W19_900	0.75183	B	B	B	-	B	B	B	A	B	A	-	B	B	A	A	A	B	A	A	A	-	B	-	B	A	A	B	A	A	B	-	B	A	A	B	-	A	A	A	B	B	-
Ps121023	9.7	12.9	Ps124536	Ps001466	Ps124536	W19_900	0.647315	B	B	B	A	B	B	B	A	B	A	B	B	B	A	A	A	B	-	A	A	A	B	-	B	A	A	B	A	A	B	A	-	A	A	B	A	A	A	A	B	B	A
Ps105070	9.7	13.5	Ps001466	W19_900	Ps124536	W19_900	0.654721	B	B	B	A	B	B	B	A	B	A	B	B	B	A	A	A	B	A	A	A	A	B	-	B	A	A	B	A	A	B	A	B	A	A	-	A	A	A	-	B	B	A
Ps144104	9.7	12.3	Ps124536	Ps001466	Ps124536	W19_900	0.639412	B	B	B	A	B	B	B	A	B	-	B	B	B	A	-	A	B	A	A	A	A	B	-	B	A	A	B	A	A	B	A	B	A	-	B	-	A	A	A	B	B	-
Ps106778	9.7	13.2	Ps001466	W19_900	Ps124536	Ps900057	0.654721	B	B	B	A	B	-	B	A	B	A	B	B	-	A	A	A	B	A	A	A	-	B	B	B	A	A	B	A	A	B	A	B	A	A	B	A	A	A	A	B	B	A
Ps129264	9.7	12.3	Ps001466	W19_900	eSSR338-224	Ps000092	0.757621	-	B	B	A	B	-	B	A	B	A	B	B	B	A	A	A	B	A	A	A	A	B	B	B	A	A	B	A	A	B	A	B	-	A	B	A	A	A	A	-	B	A
Ps148540	9.7	11.7	Ps001466	W19_900	eSSR338-224	Ps900057	0.75183	B	B	B	A	B	B	B	A	B	A	B	B	B	A	-	A	B	A	A	A	A	B	B	B	A	-	B	A	-	B	-	B	A	A	B	-	A	A	A	-	B	-
Ps162970	9.7	10.8	Ps124536	Ps001466	Ps124536	W19_900	0.738883	B	B	B	A	-	B	B	A	B	A	B	-	B	A	A	-	B	A	-	A	A	-	-	B	-	-	B	A	A	-	A	B	A	-	B	A	A	A	A	B	B	A
Ps125843	9.7	12.6	Ps001466	W19_900	Ps124536	W19_900	0.537094	B	B	B	A	B	B	B	A	B	A	B	B	B	A	A	A	B	A	A	A	A	B	-	B	A	A	B	A	A	-	-	B	A	A	B	A	A	A	-	B	-	A
Ps113963	9.7	13.2	Ps001466	W19_900	Ps124536	W19_900	0.763025	B	-	B	A	B	B	B	A	B	A	B	B	B	A	A	A	B	A	-	A	A	B	-	B	A	A	B	-	A	B	A	B	A	A	B	A	A	A	A	B	B	A
Ps130228	9.7	12.3	Ps001466	W19_900	eSSR338-224	Ps900057	1	B	B	-	A	-	B	B	A	B	A	B	B	B	-	A	-	B	A	A	A	A	B	B	B	A	A	B	A	A	B	A	B	A	A	B	A	A	A	A	B	B	-
Ps101785	9.7	13.5	Ps001466	W19_900	Ps124536	Ps900057	1	B	B	B	A	B	B	B	-	B	A	B	B	B	A	A	A	B	A	A	-	A	B	B	B	A	A	B	A	A	B	A	B	A	A	B	A	A	A	A	B	B	A
Ps150982	9.7	12	Ps124536	Ps001466	eSSR338-224	W19_900	0.527089	B	-	B	A	B	B	B	-	B	A	B	B	-	A	A	A	B	A	A	A	A	B	-	B	A	-	B	A	-	B	A	B	A	A	-	A	A	A	A	B	-	A
Ps108663	9.7	12.9	Ps001466	W19_900	Ps124536	Ps900057	0.546494	B	B	B	A	-	B	B	A	B	A	B	B	B	A	A	A	B	A	A	A	A	B	B	B	A	A	B	A	A	B	A	B	A	A	B	A	-	A	A	-	-	A
Ps129525	9.7	12.3	Ps001466	W19_900	Ps124536	Ps000092	0.537094	-	B	B	A	B	B	B	-	B	A	-	B	B	A	A	A	B	A	A	A	A	B	B	B	A	A	B	A	A	B	A	B	-	A	B	A	A	A	A	B	-	A
Ps122132	9.7	12.9	Ps001466	W19_900	Ps124536	W19_900	0.445766	B	B	B	A	B	B	B	A	B	A	B	B	B	A	A	A	B	A	-	A	A	-	-	B	A	A	B	A	A	B	A	B	A	A	-	A	A	A	A	B	B	A
Ps124200	9.7	12.9	Ps001466	W19_900	Ps124536	W19_900	0.445766	B	B	B	-	-	B	B	A	B	A	B	B	-	A	A	A	-	A	A	A	A	B	-	B	A	A	B	A	A	B	A	B	A	A	B	A	A	A	A	B	B	A
Ps129585	9.7	12.3	Ps001466	W19_900	eSSR338-224	Ps900057	1	B	B	-	A	B	B	B	A	B	A	B	B	-	A	A	A	B	A	A	A	A	B	B	B	A	A	B	A	-	B	A	B	A	-	B	-	A	A	A	B	B	A
Ps120778	9.7	12.9	Ps001466	W19_900	Ps124536	W19_900	0.647315	-	B	B	A	B	B	B	A	B	-	B	B	B	A	-	A	B	A	A	A	A	B	-	B	A	A	B	A	A	B	A	B	A	A	B	A	A	A	A	B	B	A
Ps126400	9.7	12.3	Ps001466	W19_900	Ps124536	Ps900057	0.757621	B	B	-	A	B	B	B	A	B	A	B	B	B	A	A	A	B	A	A	A	-	B	B	B	A	A	B	A	A	-	A	B	A	A	B	A	-	A	-	B	-	A
Ps146751	9.7	11.7	Ps001466	W19_900	Ps124536	Ps000092	0.75183	-	B	B	A	B	-	-	A	B	-	B	B	B	A	-	A	B	A	A	A	A	B	B	B	-	A	B	A	A	B	A	B	A	A	B	A	A	-	A	B	B	A
Ps135155	9.7	12	Ps001466	W19_900	Ps124536	Ps900057	0.639412	B	-	B	-	-	B	B	A	B	A	B	-	B	A	A	A	-	A	A	A	A	B	B	B	A	A	B	A	A	B	A	B	A	-	B	A	A	A	A	B	B	A
Ps108611	9.7	13.2	Ps001466	W19_900	eSSR338-224	W19_900	1	B	B	B	A	B	B	B	A	B	A	B	B	B	A	-	A	B	A	A	A	A	B	-	B	A	A	B	A	-	B	A	B	A	A	B	A	A	A	A	B	B	A
Ps101562	9.7	13.5	Ps001466	W19_900	Ps124536	Ps900057	0.768083	B	B	B	A	B	B	B	A	B	A	B	B	B	A	A	A	B	A	A	A	A	B	B	-	A	A	B	A	A	B	A	B	A	A	B	A	A	A	A	B	B	A
Ps102192	9.7	13.5	Ps001466	W19_900	eSSR338-224	Ps900057	1	B	B	B	A	B	B	B	A	B	A	B	B	B	A	A	A	B	-	A	A	A	B	B	B	A	A	B	A	A	B	A	B	A	A	B	A	A	A	A	B	B	A
Ps131167	9.7	12.6	Ps124536	Ps001466	Ps124536	Ps000092	0.757621	-	B	B	A	B	B	B	A	B	A	B	B	B	-	A	A	B	A	A	A	A	B	-	B	A	A	-	A	A	B	A	B	A	A	B	-	A	A	A	B	B	A
Ps161069	9.7	11.1	Ps001466	W19_900	Ps124536	W19_900	0.621873	B	B	B	-	B	B	B	A	B	-	-	B	B	A	A	A	-	A	-	A	A	B	-	B	A	-	B	A	A	B	A	B	A	A	B	A	-	A	A	B	-	A
Ps106623	9.7	13.5	Ps124536	Ps001466	Ps124536	W19_900	0.881497	B	B	B	A	B	B	B	A	B	A	B	B	B	A	A	A	B	A	A	A	A	B	-	B	A	A	B	A	A	B	A	B	A	-	B	A	A	A	A	B	B	A
Ps158168	9.7	11.4	Ps124536	Ps001466	Ps124536	W19_900	0.745603	B	B	B	A	B	B	B	-	B	A	B	B	B	-	A	A	B	A	A	A	A	B	-	-	A	A	B	A	A	-	A	B	-	A	B	A	A	A	A	-	-	A
Ps110545	9.7	12.9	Ps001466	W19_900	Ps124536	Ps900057	0.763025	B	B	B	A	B	B	B	A	B	A	B	B	B	A	A	A	B	A	A	A	A	B	B	B	A	A	B	-	A	B	-	B	-	A	B	A	A	A	A	B	B	-
Ps112031	9.7	13.2	Ps001466	W19_900	Ps124536	W19_900	0.546494	-	B	B	A	B	B	B	A	B	A	B	-	B	A	A	A	B	A	A	A	A	B	-	B	A	A	B	A	A	B	A	B	A	A	B	A	A	A	A	B	B	A
Ps109308	9.7	13.2	Ps124536	Ps001466	Ps124536	W19_900	0.763025	B	B	B	A	B	B	B	A	B	A	B	B	B	A	A	A	-	A	A	A	A	B	-	B	A	A	B	A	A	B	A	B	A	A	B	-	A	A	A	B	B	A
Ps115437	9.7	12.6	Ps001466	W19_900	eSSR338-224	Ps900057	0.647315	B	B	B	A	-	B	B	A	B	A	B	B	B	A	A	A	-	A	A	-	A	B	B	B	A	A	B	A	-	B	A	B	A	A	B	A	A	A	A	B	-	A
Ps129197	9.7	12.6	Ps124536	Ps001466	Ps124536	W19_900	0.757621	-	B	B	A	B	B	B	A	B	A	B	B	B	A	A	A	B	A	A	-	A	B	-	-	A	A	B	A	A	B	A	B	A	A	B	A	A	A	-	B	B	A
Ps112288	9.7	13.2	Ps001466	W19_900	Ps124536	W19_900	0.763025	B	B	B	A	B	B	B	A	B	A	B	B	B	A	A	-	B	A	A	A	A	B	-	-	A	A	B	A	A	B	A	B	A	A	B	A	-	A	A	B	B	A
Ps100406	9.7	14.1	Ps001466	W19_900	Ps124536	W19_900	0.66168	B	B	B	A	B	B	B	A	B	A	B	B	B	A	A	A	B	A	A	A	A	B	-	B	A	A	B	A	A	B	A	B	A	A	B	A	A	A	A	B	B	A
Ps155508	9.7	11.7	Ps001466	W19_900	Ps124536	W19_900	0.630954	B	B	B	A	-	B	B	A	B	A	B	B	B	-	A	A	B	A	A	-	A	B	-	B	A	A	B	A	A	B	A	-	-	A	-	A	A	A	-	B	B	A
Ps150384	9.7	12	Ps124536	Ps001466	Ps124536	W19_900	0.527089	B	B	B	A	B	B	B	A	B	A	B	B	B	A	A	A	B	A	A	A	A	B	-	B	A	A	B	A	A	B	-	B	A	A	B	-	-	-	-	B	B	A
Ps128133	9.7	12.6	Ps001466	W19_900	Ps124536	W19_900	1	B	B	B	A	B	B	B	A	B	-	B	B	B	A	A	A	B	A	A	A	A	B	-	B	-	A	B	-	A	B	A	B	A	A	B	-	A	A	A	B	-	A
Ps110899	9.7	13.2	Ps001466	W19_900	Ps124536	W19_900	0.546494	B	B	B	A	B	B	-	A	B	A	B	B	B	A	A	-	B	A	A	A	A	B	-	B	A	A	B	A	A	B	A	B	A	A	B	A	A	A	A	B	-	A
Ps141286	9.7	12.3	Ps124536	Ps001466	Ps124536	W19_900	0.875896	B	B	B	A	B	B	B	A	B	A	B	-	B	A	A	A	B	A	A	-	A	B	-	B	A	-	B	A	A	B	A	B	A	A	B	A	A	-	A	B	B	A
Ps161478	9.7	10.8	Ps001466	W19_900	eSSR338-224	Ps900057	0.869417	B	B	B	A	B	B	B	A	B	A	B	B	-	A	-	-	B	A	A	A	-	B	B	B	A	A	B	-	A	-	A	B	A	A	-	A	-	-	A	B	B	A
Ps112537	9.7	13.2	Ps001466	W19_900	Ps124536	W19_900	0.763025	B	B	B	-	B	B	B	A	B	A	B	B	B	A	-	A	B	A	A	A	A	B	-	-	A	A	B	A	A	B	A	B	A	A	B	A	A	A	A	B	B	A
Ps145911	9.7	12	Ps001466	W19_900	Ps124536	W19_900	0.527089	B	B	-	-	B	B	B	A	-	A	-	B	B	A	-	A	B	A	A	A	A	B	-	B	A	A	B	A	A	B	A	B	A	A	-	-	A	A	A	B	B	A
Ps142036	9.7	12.3	Ps001466	W19_900	Ps124536	W19_900	0.639412	B	B	B	A	B	B	B	A	B	A	B	B	-	A	-	-	B	A	A	A	-	B	-	B	A	A	B	A	A	B	A	B	A	A	B	A	A	A	A	B	B	A
Ps140711	9.7	12.3	Ps124536	Ps001466	Ps124536	W19_900	0.639412	B	B	B	A	B	B	B	A	B	-	-	B	B	-	A	A	B	A	A	A	A	B	-	B	A	A	B	A	A	B	A	B	A	A	B	A	A	A	A	-	B	A
Ps121333	9.7	12.6	Ps001466	W19_900	Ps124536	Ps900057	0.647315	B	B	B	A	-	B	-	A	B	-	B	B	B	A	A	A	B	A	A	A	A	B	B	B	A	A	B	A	A	B	A	B	A	A	B	A	A	A	A	B	B	-
Ps139476	9.7	12	Ps001466	W19_900	Ps124536	Ps900057	0.639412	B	B	B	A	B	-	B	A	B	-	B	B	B	A	A	A	B	A	A	A	A	B	B	B	-	A	B	A	A	B	-	B	-	A	B	A	-	A	-	B	B	A
Ps161215	9.7	11.1	Ps124536	Ps001466	Ps124536	W19_900	0.869417	B	B	B	A	B	B	B	A	B	A	B	B	B	A	-	A	B	A	A	A	A	B	-	B	A	A	B	A	A	B	A	-	A	-	B	A	-	-	A	B	-	A
Ps131327	9.7	12.3	Ps001466	W19_900	Ps124536	Ps900057	1	B	B	B	A	-	B	B	A	B	A	B	B	B	A	-	A	-	A	A	A	A	B	B	B	A	A	B	A	A	B	A	B	A	-	B	A	-	A	A	B	B	A
Ps138048	9.7	12	Ps001466	W19_900	eSSR338-224	Ps900057	0.43488	B	B	B	A	B	B	B	A	B	A	B	B	B	-	A	A	B	A	A	A	A	B	B	B	-	-	B	-	-	B	-	B	A	A	B	A	A	A	A	B	B	-
Ps117244	9.7	12.9	Ps124536	Ps001466	Ps124536	W19_900	0.445766	B	B	-	A	-	B	B	A	B	A	B	B	B	A	A	A	B	A	A	A	A	B	-	B	A	A	B	A	A	B	A	B	A	A	B	A	A	A	A	B	B	A
Ps122777	9.7	12.6	Ps001466	W19_900	Ps124536	Ps900057	0.647315	B	B	B	A	B	B	B	A	B	A	B	B	B	A	-	-	B	A	A	A	-	B	B	B	A	A	B	-	A	B	A	B	A	A	B	A	A	A	A	B	B	-
Ps140660	9.7	12.3	Ps124536	Ps001466	eSSR338-224	W19_900	0.875896	B	B	B	A	B	B	-	A	B	A	B	B	B	A	A	A	B	A	-	A	A	B	-	B	A	A	B	A	-	B	A	B	-	A	B	A	A	A	-	B	B	A
Ps122144	9.7	12.9	Ps001466	W19_900	Ps124536	W19_900	0.445766	B	B	B	A	B	-	B	A	B	A	-	-	B	A	A	A	B	A	A	A	A	B	-	B	A	A	B	A	A	B	A	B	A	A	B	A	A	-	A	B	B	A
Ps132894	9.7	12.6	Ps001466	W19_900	Ps124536	W19_900	0.757621	B	B	B	A	B	B	B	A	B	-	B	B	B	A	A	A	B	A	A	A	A	-	-	B	A	A	B	A	A	B	-	B	A	A	B	A	A	A	A	B	B	-
Ps135189	9.7	12	Ps001466	W19_900	Ps124536	Ps900057	0.639412	B	B	B	A	B	B	B	A	-	A	B	B	B	A	-	-	B	A	-	A	A	B	B	B	A	A	B	A	A	B	A	B	A	A	B	-	A	-	A	B	B	A
Ps106016	9.7	13.5	Ps001466	W19_900	Ps124536	W19_900	0.456057	B	B	B	A	B	B	B	A	B	A	B	B	B	A	A	A	B	A	A	A	A	B	-	B	A	A	B	A	A	B	A	B	A	A	B	A	A	A	A	B	-	A
Ps102047	9.7	13.8	Ps124536	Ps001466	Ps124536	W19_900	0.768083	B	B	B	A	B	B	B	A	B	A	B	B	B	A	A	A	B	A	A	A	A	B	-	B	A	A	B	A	A	B	A	B	A	A	B	A	A	A	A	B	B	A
Ps119101	9.7	12.6	Ps001466	W19_900	Ps124536	Ps900057	0.878794	B	B	B	A	B	-	B	A	-	A	B	B	B	A	A	-	B	A	A	A	A	B	B	B	A	-	B	A	A	B	A	B	A	A	B	A	A	A	A	B	B	-
Ps144415	9.7	12.3	Ps124536	Ps001466	eSSR338-224	W19_900	0.639412	B	B	B	A	B	B	B	A	B	A	B	-	B	A	A	A	B	A	A	A	A	B	-	B	A	A	B	A	-	-	A	B	A	A	-	A	-	-	A	B	B	A
Ps160182	9.7	11.4	Ps001466	W19_900	Ps124536	W19_900	1	B	B	B	A	B	B	B	A	B	-	B	B	B	A	A	A	B	A	A	A	A	-	-	B	A	A	B	A	A	B	-	B	-	-	B	-	A	A	-	-	B	A
Ps157522	9.7	11.4	Ps001466	W19_900	Ps124536	W19_900	1	B	B	B	A	B	B	B	A	-	-	B	B	B	A	A	A	B	A	A	-	A	B	-	-	A	A	B	A	A	B	-	B	A	A	B	-	-	A	A	B	-	A
Ps128777	9.7	12.6	Ps124536	Ps001466	Ps124536	W19_900	0.757621	B	B	B	A	-	B	B	-	B	-	-	B	B	A	A	A	B	A	A	A	A	B	-	B	A	A	B	A	A	B	A	B	A	A	B	A	A	A	A	B	B	A
Ps105750	9.7	13.5	Ps001466	W19_900	Ps124536	W19_900	0.456057	B	B	B	A	B	B	B	A	B	A	B	B	B	A	A	A	B	A	A	A	A	B	-	B	A	A	B	A	A	-	A	B	A	A	-	A	A	A	A	B	B	A
Ps158849	9.7	11.1	Ps001466	W19_900	eSSR338-224	Ps900057	0.745603	B	B	B	A	B	B	B	A	B	A	B	B	B	A	A	-	B	A	A	A	A	B	B	B	A	-	B	-	-	-	-	B	A	-	B	A	A	A	-	-	-	A
Ps001397	10.1	24.1	Ps001466	W19_900	Ps124536	W19_900	0.66168	B	B	B	A	B	B	B	A	B	A	B	B	B	A	A	A	B	A	A	A	A	B	-	B	A	A	B	A	A	B	A	B	A	A	B	A	A	A	A	B	B	A
Ps001232	10.2	23.2	Ps001466	W19_900	Ps001466	W19_900	0.654721	B	B	B	A	B	B	B	A	B	A	B	B	B	A	A	A	B	A	A	A	A	B	-	B	A	A	-	A	A	B	A	B	A	-	B	A	A	A	A	B	B	A
Ps156898	10.3	9.4	Ps001466	W19_900	eSSR338-224	Ps900057	0.630954	B	-	B	-	B	B	B	-	B	A	B	-	B	A	A	A	B	A	A	A	-	B	B	B	A	A	B	A	-	-	-	B	A	B	B	A	A	A	-	B	B	A
Ps001503	10.5	21.5	Ps001466	W19_900	Ps124536	W19_900	0.768083	B	B	B	A	B	B	B	A	B	A	B	B	B	A	A	A	B	A	A	A	A	B	-	B	A	A	B	A	A	B	A	B	A	A	B	A	A	A	A	B	B	A
Ps162954	10.5	8.9	Ps001466	W19_900	eSSR338-224	Ps900057	0.738883	B	-	B	A	B	-	B	-	-	A	B	B	B	A	A	-	B	A	A	A	A	B	-	B	A	A	B	A	-	-	-	-	A	B	B	A	A	A	A	B	-	-
Ps106339	10.5	11.5	Ps001466	W19_900	Ps124536	Ps900057	0.881497	B	B	-	A	B	B	B	A	B	A	B	B	B	A	A	A	B	-	A	A	A	B	-	B	A	A	B	A	A	B	A	B	A	B	B	A	A	A	A	B	B	A
Ps001330	10.7	20	Ps001466	W19_900	Ps124536	W19_900	0.537094	-	B	B	A	B	B	B	A	B	A	B	B	-	A	A	A	B	A	A	A	A	B	-	B	-	A	-	A	A	B	A	B	A	A	B	A	A	A	A	B	B	A
Ps001531	10.9	42.9	Ps001466	W19_900	Ps124536	W19_900	0.768083	B	B	B	A	B	B	B	A	B	A	B	B	B	A	A	A	B	A	A	A	A	B	-	B	A	A	B	A	A	B	A	B	A	A	B	A	A	A	A	B	B	A
W19_900	12.1						0.386476	B	B	B	A	B	B	B	A	B	A	B	B	B	A	A	A	B	A	A	A	A	B	A	B	A	A	A	A	A	B	A	B	A	A	B	A	A	A	A	B	B	A
Ps140260	12.1	12.3	W19_900	Ps900057	Ps001466	Ps900057	0.639412	B	B	-	A	B	B	-	A	B	A	B	B	B	A	A	A	B	A	-	A	A	B	-	B	A	A	A	-	-	B	A	B	A	-	B	A	A	A	A	B	B	A
Ps152297	12.1	11.7	W19_900	Ps900057	Ps124536	Ps900057	0.87278	B	B	-	-	B	B	B	A	B	A	B	B	B	A	A	A	B	A	A	-	A	B	-	-	A	A	-	A	A	B	-	B	-	A	B	-	A	A	A	B	B	A
Ps127316	12.1	12.6	W19_900	Ps900057	Ps124536	Ps900057	0.537094	B	-	B	A	B	B	B	A	B	A	-	B	B	A	A	A	B	A	A	A	A	B	-	B	A	A	-	A	A	B	A	B	-	A	B	A	A	A	A	B	B	A
Ps119130	12.1	12.9	W19_900	Ps900057	Ps124536	Ps900057	0.445766	B	B	-	A	B	B	B	A	B	-	B	B	B	A	A	A	B	A	A	A	A	B	-	B	A	A	-	A	A	B	A	B	A	A	B	A	A	A	A	B	B	A
Ps150463	12.1	12	W19_900	Ps900057	Ps124536	Ps900057	1	B	B	B	A	B	-	B	A	B	A	B	B	B	A	A	A	B	A	-	A	A	B	-	B	-	A	-	A	A	B	A	B	-	A	B	A	A	A	A	B	B	A
Ps132279	12.1	12.6	W19_900	Ps900057	Ps124536	Ps900057	1	B	B	B	A	B	B	B	A	B	A	B	B	B	A	-	A	B	A	A	A	A	B	-	B	-	A	-	A	A	B	-	B	A	A	B	A	A	A	A	B	B	A
Ps131398	12.1	12.6	W19_900	Ps900057	Ps124536	Ps900057	0.537094	B	B	B	A	B	B	-	A	B	A	-	B	B	A	-	A	B	A	A	A	A	B	-	B	A	A	-	A	A	B	A	B	A	A	B	A	-	A	A	B	B	A
Ps144265	12.1	12.3	Ps001466	W19_900	Ps001466	Ps000092	0.274299	-	-	-	A	B	B	B	A	B	A	-	B	B	A	A	A	B	A	A	A	A	B	-	B	A	A	A	A	A	B	A	B	A	-	B	A	A	A	-	B	B	A
Ps130998	12.1	12.6	W19_900	Ps900057	Ps124536	Ps900057	0.757621	B	B	B	A	B	B	B	A	B	A	-	B	B	A	A	A	B	-	-	-	A	B	-	B	A	A	-	A	A	B	A	B	A	A	B	A	A	A	A	B	B	A
Ps105294	14	11.5	W19_900	Ps900057	Ps001466	Ps900057	0.456057	B	B	A	A	B	B	B	-	B	A	B	B	B	A	A	A	B	A	A	A	A	B	-	B	A	A	A	A	A	B	A	B	A	-	B	A	A	A	A	B	B	A
Ps159110	14	9.4	W19_900	Ps900057	Ps001466	Ps900057	0.745603	B	B	A	A	B	B	B	A	-	A	B	B	B	A	A	A	B	A	A	-	A	B	A	B	A	A	A	-	A	B	A	B	A	-	-	-	-	A	-	B	B	-
Ps148895	14	11.7	W19_900	Ps900057	Ps124536	Ps900057	0.342782	B	-	B	-	B	-	-	A	B	A	B	B	-	A	A	A	B	A	A	A	A	B	B	B	A	A	-	A	A	B	A	B	A	A	B	-	A	A	A	B	B	A
Ps118490	14	12.6	W19_900	Ps900057	Ps124536	Ps900057	0.647315	B	B	B	A	B	B	B	A	-	A	B	B	B	A	A	A	B	A	A	A	-	B	B	B	A	A	-	A	A	B	A	B	A	A	B	-	A	A	A	-	B	A
Ps152475	14	9.7	W19_900	Ps900057	Ps001466	Ps900057	0.87278	B	B	A	A	B	B	-	A	B	A	B	B	B	-	A	A	B	A	A	A	A	B	-	B	A	A	A	A	A	B	-	B	-	-	B	-	A	A	A	B	B	A
Ps155781	14	9.7	W19_900	Ps900057	Ps001466	Ps900057	0.262332	B	-	A	A	B	B	-	-	B	A	B	B	B	A	A	A	B	A	A	A	A	B	A	B	-	A	A	-	A	B	-	-	A	-	B	A	A	A	A	-	B	A
Ps134921	14	10.6	W19_900	Ps900057	Ps001466	Ps900057	0.537094	B	B	A	A	B	B	B	A	B	A	B	B	B	A	A	A	B	A	A	A	-	B	-	B	A	A	A	A	A	B	A	B	A	-	-	-	A	A	-	B	B	A
Ps100594	14	13.8	W19_900	Ps900057	Ps124536	Ps900057	0.66168	B	B	B	A	B	B	B	A	B	A	B	B	B	A	A	A	B	A	A	A	A	B	B	B	A	A	-	A	A	B	A	B	A	A	B	A	A	A	A	B	B	A
Ps149543	14	11.7	W19_900	Ps900057	Ps124536	Ps900057	0.75183	B	B	B	A	B	B	B	A	B	A	B	-	B	A	A	A	-	-	-	A	A	B	B	B	A	A	-	A	A	B	A	B	A	-	B	A	A	A	-	B	B	A
Ps161257	14.1	9.1	W19_900	Ps900057	Ps001466	Ps900057	0.249817	B	B	A	A	-	-	B	A	B	A	B	B	-	A	A	A	B	A	A	-	-	B	-	B	A	A	A	A	-	B	A	B	A	-	-	A	A	-	A	B	B	A
Ps143748	14.1	10.3	W19_900	Ps900057	Ps001466	Ps900057	0.639412	B	B	A	A	B	B	B	-	B	-	B	B	B	A	A	A	B	A	A	A	A	B	-	B	A	A	A	A	A	B	-	-	-	-	B	A	A	A	A	B	B	A
Ps151684	14.1	10	W19_900	Ps900057	Ps001466	Ps900057	0.75183	B	B	A	A	B	B	B	-	B	A	B	B	B	-	A	A	-	-	A	A	A	B	-	B	A	A	A	A	A	B	A	B	A	-	B	A	A	A	A	B	B	A
Ps161639	14.1	9.1	W19_900	Ps900057	Ps001466	Ps900057	0.41108	B	B	A	A	B	B	B	A	-	A	-	B	B	A	A	A	B	-	A	A	A	B	-	B	A	A	A	A	A	B	A	B	-	-	B	-	A	A	A	B	B	-
W19_1600	14.2	29.1	W19_900	Ps900057	W19_900	Ps900057	0.563703	B	B	B	A	B	B	B	A	B	A	B	A	B	A	A	A	B	A	A	A	A	B	B	B	A	A	B	A	A	B	A	B	A	A	B	A	A	A	A	B	B	A
Ps117073	14.7	10	W19_900	Ps900057	Ps001466	Ps000092	0.445766	B	B	A	A	B	B	B	A	B	A	-	B	B	A	A	-	B	A	A	-	A	-	-	B	A	A	A	A	A	B	A	B	A	B	B	A	A	A	A	B	B	A
Ps125663	14.8	9.7	W19_900	Ps900057	Ps001466	Ps000092	0.354539	B	B	-	A	B	-	B	A	B	A	B	-	B	A	A	A	B	A	A	A	A	B	B	B	A	A	A	-	A	-	A	B	A	B	B	A	A	A	A	-	B	A
Ps120772	14.8	10.3	W19_900	Ps900057	Ps001466	Ps000092	0.169912	B	-	A	A	B	-	B	A	B	A	B	B	B	A	A	A	B	A	A	A	A	-	B	B	A	A	A	A	A	B	A	B	A	-	B	A	A	A	A	B	B	A
Ps147862	14.8	9.1	W19_900	Ps900057	Ps001466	Ps000092	0.205903	B	-	A	A	B	B	B	A	B	A	-	B	B	A	A	A	B	A	A	A	-	B	-	B	A	A	A	A	A	-	A	B	A	B	B	A	A	A	A	-	-	A
Ps145465	14.8	9.1	W19_900	Ps900057	Ps001466	Ps000092	0.342782	B	B	A	-	B	-	-	A	B	A	B	B	B	A	A	A	B	A	A	A	A	B	B	-	-	A	A	A	A	B	A	B	A	-	B	A	A	A	-	B	-	A
Ps104133	14.8	10.6	W19_900	Ps900057	Ps001466	Ps000092	0.654721	B	B	A	-	B	B	B	A	B	A	B	B	B	A	A	A	B	A	A	A	A	B	B	B	A	A	A	A	A	B	-	B	A	-	B	A	A	A	A	B	B	A
Ps107902	14.8	10.3	W19_900	Ps900057	Ps001466	Ps000092	0.365712	B	B	A	A	B	B	B	A	B	A	B	B	-	A	A	A	-	A	A	A	A	B	B	B	-	A	A	A	A	B	A	B	A	-	B	A	A	A	A	B	B	A
Ps131659	14.8	9.7	W19_900	Ps900057	Ps001466	Ps000092	0.122823	B	-	A	A	B	-	B	A	-	A	B	B	B	A	A	A	B	A	A	A	A	B	B	-	A	A	A	A	A	B	A	B	A	-	B	A	A	A	A	B	-	A
Ps900057	16.2						0.217044	A	B	-	A	B	B	B	A	B	A	B	B	B	A	A	A	B	A	A	A	A	B	-	B	A	A	A	A	A	B	A	B	A	-	B	A	A	-	A	B	B	A
Ps900243	16.2	24.7	Ps900057	Ps001374	W19_900	Ps001374	0.2278	A	B	-	A	B	B	B	A	B	A	B	B	B	A	A	A	B	A	A	A	A	B	-	B	A	A	A	A	A	B	A	B	A	-	B	A	A	A	A	B	B	A
Ps113191	16.2	12.9	W19_900	Ps900057	W19_900	Ps000092	0.365712	A	B	-	A	B	B	B	-	B	A	B	B	B	A	A	A	B	A	A	A	A	B	-	B	A	A	A	A	A	B	A	B	A	-	B	A	A	A	A	B	B	A
Ps159169	16.2	11.1	W19_900	Ps900057	W19_900	Ps000092	0.0515759	A	B	-	A	-	-	B	A	-	A	B	B	B	A	-	A	-	A	A	A	A	B	-	-	A	A	A	A	A	B	A	B	A	A	B	A	A	-	A	B	B	A
Ps001374	18.1						0.2278	A	B	-	A	B	B	B	A	B	A	B	B	B	A	A	A	B	A	A	A	A	B	-	B	A	A	A	A	A	B	A	B	A	-	B	A	A	A	A	B	B	A
Ps109466	18.1	12.3	Ps001374	Ps000092	W19_900	Ps000092	0.2278	A	B	A	A	B	B	B	A	-	A	B	B	B	A	A	A	B	A	A	A	A	B	-	B	A	A	A	A	A	B	A	B	A	B	B	-	A	A	A	B	B	A
Ps101610	18.1	12.9	Ps001374	Ps000092	W19_900	Ps000092	0.238185	A	B	A	A	B	B	B	A	B	A	B	B	B	-	A	A	B	A	A	A	A	B	-	B	A	A	A	A	A	B	A	B	A	A	B	A	A	A	A	B	B	A
Ps157453	18.1	10.2	Ps001374	Ps000092	W19_900	Ps000092	0.00944417	A	-	A	A	B	-	B	A	-	A	-	B	B	A	A	A	B	A	A	A	A	B	A	B	-	A	A	A	A	B	A	B	-	A	-	A	A	A	A	-	B	A
Ps112381	18.1	12.3	Ps001374	Ps000092	W19_900	Ps000092	0.2278	A	B	A	A	B	B	B	A	B	A	B	B	-	A	-	A	B	A	A	A	A	B	-	B	A	A	A	A	A	B	A	B	A	A	B	A	A	A	A	B	B	-
Ps136723	18.1	11.7	Ps001374	Ps000092	W19_900	Ps000092	0.43488	A	B	A	A	B	B	B	A	B	-	B	B	B	A	A	A	B	A	A	-	A	B	-	B	A	A	A	A	-	B	A	B	A	-	B	A	A	A	A	B	B	A
Ps160318	18.1	10.5	Ps001374	Ps000092	W19_900	Ps000092	0.33039	A	-	A	A	-	B	B	A	B	A	B	B	B	A	A	A	B	A	A	A	A	B	B	B	-	-	A	-	A	-	A	-	A	-	B	A	A	-	-	B	B	A
Ps117475	18.1	12.3	Ps001374	Ps000092	W19_900	Ps000092	0.445766	A	B	A	A	B	B	B	A	B	A	B	B	B	A	-	A	B	A	A	A	A	B	B	B	A	A	A	A	A	B	A	B	A	-	B	A	-	A	-	B	B	A
Ps132683	18.1	11.7	Ps001374	Ps000092	W19_900	Ps000092	0.354539	A	B	A	A	B	B	B	A	-	-	B	B	B	A	A	A	B	A	A	A	A	B	B	B	A	A	A	A	A	B	A	-	-	-	B	-	A	A	A	B	B	A
Ps155378	18.1	11.1	Ps001374	Ps000092	W19_900	Ps000092	0.149541	A	-	A	A	B	B	B	A	B	A	B	B	B	-	A	A	B	A	A	A	A	B	-	B	A	A	A	-	A	B	A	B	A	A	B	A	A	-	-	-	B	A
Ps120834	18.1	11.7	Ps001374	Ps000092	W19_900	Ps000092	0.0934478	A	B	A	A	B	B	B	A	B	A	B	B	-	A	A	A	B	A	A	A	A	B	A	B	A	A	A	A	A	B	A	B	A	B	B	A	A	A	A	-	-	A
Ps137610	18.1	11.7	Ps001374	Ps000092	W19_900	Ps000092	0.43488	A	B	-	A	B	B	-	A	B	A	B	B	B	A	A	A	B	A	A	A	A	B	B	B	-	A	A	A	A	B	-	B	A	-	B	A	A	A	A	-	B	A
Ps122956	18.1	12.6	Ps001374	Ps000092	W19_900	Ps000092	0.445766	A	B	-	A	B	B	B	A	B	A	B	B	B	A	A	-	B	A	A	A	A	B	-	B	A	A	A	A	A	B	A	B	A	B	B	A	A	A	A	B	B	-
Ps143989	18.1	11.7	Ps001374	Ps000092	W19_900	Ps000092	0.43488	A	B	A	A	B	-	B	-	B	A	B	B	B	A	A	A	B	A	A	A	-	B	-	B	A	-	A	A	A	B	A	B	A	B	B	-	A	A	A	B	B	A
Ps131258	18.1	12.3	Ps001374	Ps000092	W19_900	Ps000092	0.122823	A	B	A	A	B	B	B	A	B	A	B	B	B	-	A	A	B	A	A	A	A	B	-	-	A	A	A	A	A	B	A	B	A	-	B	A	A	A	A	-	B	A
Ps110188	18.1	12.3	Ps001374	Ps000092	W19_900	Ps000092	0.365712	A	B	A	A	B	B	B	A	B	A	B	B	B	A	A	-	B	A	A	A	A	B	B	B	A	A	A	A	A	B	-	B	A	-	B	A	A	A	A	-	B	A
Ps125347	18.1	12.3	Ps001374	Ps000092	W19_900	Ps000092	0.354539	A	B	A	A	B	B	B	A	B	A	B	B	B	A	A	-	B	A	A	A	A	B	-	B	A	A	-	A	-	B	A	B	A	-	B	A	A	A	A	B	B	A
Ps144920	18.1	11.4	Ps001374	Ps000092	W19_900	Ps000092	0.342782	-	B	A	A	B	B	B	A	B	A	B	B	B	A	A	A	B	A	-	A	A	B	-	B	A	A	A	-	A	B	A	-	A	B	B	A	A	A	A	B	B	A
Ps138672	18.1	11.4	Ps001374	Ps000092	W19_900	Ps000092	0.159854	A	B	A	A	B	B	B	A	B	A	-	B	-	A	A	A	B	A	A	A	-	-	A	B	-	A	A	A	A	B	A	B	A	-	B	A	A	A	A	B	B	A
Ps136812	18.1	11.7	Ps001374	Ps000092	W19_900	Ps000092	0.159854	A	B	A	A	B	B	B	A	B	A	B	B	B	A	A	A	B	A	A	A	A	B	B	-	A	A	A	A	A	B	A	B	-	-	B	-	A	A	A	-	-	A
Ps109945	18.1	12.3	Ps001374	Ps000092	W19_900	Ps000092	0.365712	A	B	A	A	B	B	B	A	B	-	B	B	B	A	A	A	B	A	-	A	A	B	B	B	A	A	A	A	A	B	A	B	A	-	B	A	A	A	A	-	B	A
Ps143206	18.1	12	Ps001374	Ps000092	eSSR338-224	Ps000092	0.43488	-	-	B	A	B	B	B	A	B	A	-	B	-	A	A	A	B	A	A	A	-	B	B	B	A	A	-	A	-	B	A	B	A	A	B	A	A	A	A	B	B	A
Ps124260	18.1	12	Ps001374	Ps000092	W19_900	Ps000092	0.285751	-	B	A	A	-	B	B	A	B	A	B	B	B	A	A	A	B	A	A	A	A	B	B	B	A	A	A	A	A	B	A	B	A	B	B	A	A	A	A	B	B	A
Ps157307	18.1	10.8	Ps001374	Ps000092	W19_900	Ps000092	0.194366	A	B	A	-	B	B	B	A	B	A	B	B	B	A	A	A	B	A	-	-	A	-	-	B	A	A	A	A	A	-	A	B	A	-	B	A	A	A	A	-	B	A
Ps140571	18.1	11.4	Ps001374	Ps000092	W19_900	Ps000092	0.875896	A	B	A	-	B	B	B	-	B	A	B	B	B	A	A	A	B	A	A	A	A	B	-	B	A	-	A	A	-	B	-	B	A	B	B	-	A	A	A	B	B	A
Ps153105	18.1	11.1	Ps001374	Ps000092	W19_900	Ps000092	0.037373	A	B	A	A	B	-	B	A	B	A	-	-	B	A	A	A	-	A	A	A	A	B	-	B	A	A	A	-	A	B	A	B	A	-	B	A	-	A	A	B	-	A
Ps123262	18.1	12.3	Ps001374	Ps000092	W19_900	Ps000092	0.445766	A	B	A	-	B	B	B	A	B	A	B	B	B	A	A	A	B	A	-	A	A	B	B	B	A	-	A	A	A	B	A	B	A	-	B	A	A	A	A	B	B	A
Ps153880	18.1	11.1	Ps001374	Ps000092	W19_900	Ps000092	0.630954	A	B	-	A	B	B	B	-	B	A	B	B	B	A	A	A	B	-	-	A	-	B	B	B	A	A	A	A	A	-	A	-	A	-	B	A	A	A	-	B	B	A
Ps112920	18.1	12	Ps001374	Ps000092	W19_900	Ps000092	0.365712	A	B	A	A	B	B	B	A	B	A	B	B	B	-	A	-	B	A	A	A	A	B	B	B	A	A	A	A	-	B	A	B	A	A	B	A	A	A	A	-	B	A
Ps113159	18.1	12.6	Ps001374	Ps000092	W19_900	Ps000092	0.0704404	A	-	A	A	B	B	B	A	B	A	B	B	B	A	A	A	B	A	A	A	A	B	-	-	A	A	A	A	A	B	A	B	A	A	B	A	A	A	A	B	B	A
Ps127776	18.1	11.4	Ps001374	Ps000092	W19_900	Ps000092	0.537094	A	B	A	A	B	B	B	A	B	A	B	B	B	A	-	A	B	A	A	A	A	B	B	B	A	A	A	A	-	B	-	-	A	A	B	A	A	-	A	B	B	A
Ps122488	18.1	12	Ps001374	Ps000092	W19_900	Ps000092	0.285751	A	B	A	-	B	B	B	A	B	A	B	B	B	A	A	A	-	A	A	A	A	B	B	-	A	A	A	A	A	B	A	B	A	-	B	A	A	A	A	B	B	A
Ps109383	18.1	12.3	Ps001374	Ps000092	W19_900	Ps000092	0.365712	-	B	A	A	B	-	B	A	B	A	B	B	B	A	A	A	B	A	A	A	A	B	B	B	A	A	A	A	A	B	A	B	A	B	B	-	A	A	A	B	B	A
Ps145985	18.1	10.8	Ps001374	Ps000092	W19_900	Ps000092	0.342782	-	B	A	A	B	B	B	A	-	A	-	B	B	A	A	-	B	A	A	A	A	B	B	B	A	A	A	-	A	-	-	B	A	A	B	A	A	A	A	B	B	A
Ps162187	18.1	10.8	Ps001374	Ps000092	W19_900	Ps000092	0.0136637	A	B	A	A	B	-	B	A	-	A	B	B	-	A	A	A	-	A	A	A	A	B	-	B	A	A	A	A	A	-	A	B	A	-	B	-	A	A	A	-	B	A
Ps127159	18.1	12	Ps001374	Ps000092	W19_900	Ps000092	0.122823	A	B	A	A	B	B	B	A	B	A	B	B	B	A	A	A	-	A	A	A	A	B	-	B	A	-	A	A	A	B	A	B	A	A	B	A	-	A	A	B	-	A
Ps133346	18.1	11.7	Ps001374	Ps000092	W19_900	Ps000092	0.537094	A	B	A	A	-	B	B	A	B	A	B	B	B	-	A	A	B	A	A	A	A	B	-	B	A	A	A	A	A	B	A	B	-	B	B	A	-	A	A	B	B	A
Ps142878	18.1	11.7	Ps001374	Ps000092	W19_900	Ps000092	0.159854	A	B	A	A	B	B	B	A	B	A	-	B	B	-	A	A	B	A	A	A	A	B	-	B	A	A	-	A	A	B	A	B	A	A	B	-	A	A	A	-	B	A
Ps112493	18.1	12.3	Ps001374	Ps000092	W19_900	Ps000092	0.546494	A	B	A	A	B	B	B	-	B	A	B	B	B	-	A	A	B	A	A	A	A	B	B	B	A	A	A	A	A	B	A	B	A	-	B	A	A	A	A	B	B	-
Ps122646	18.1	12.3	Ps001374	Ps000092	W19_900	Ps000092	0.285751	A	B	A	A	B	B	B	A	B	A	B	B	B	A	A	A	B	A	A	-	A	B	B	B	A	-	A	A	A	B	A	-	A	-	B	A	A	A	A	B	B	A
Ps134612	18.1	12	Ps001374	Ps000092	W19_900	Ps000092	0.217044	A	B	A	A	B	-	B	A	B	A	B	B	B	A	A	A	B	A	-	A	A	B	-	B	A	A	A	A	A	B	-	B	A	A	B	A	A	-	A	B	B	A
Ps115204	18.1	11.7	Ps001374	Ps000092	W19_900	Ps000092	0.878794	A	B	A	A	B	B	B	A	B	-	B	B	B	A	A	A	B	A	A	-	A	B	B	B	A	A	A	A	-	B	A	B	A	B	B	A	-	A	-	B	B	A
Ps142381	18.1	11.4	Ps001374	Ps000092	W19_900	Ps000092	0.159854	A	-	A	A	B	B	B	A	B	A	B	-	B	A	A	A	-	A	A	A	-	B	B	B	A	A	A	A	-	-	A	B	A	-	B	A	A	A	A	B	B	A
Ps106704	18.1	13.2	Ps001374	Ps000092	W19_900	Ps000092	0.179712	A	B	A	A	B	B	B	A	B	A	B	B	B	A	A	A	B	A	A	A	A	B	-	B	A	A	A	A	A	B	A	B	A	-	B	A	A	A	A	B	B	A
Ps120593	18.1	12.3	Ps001374	Ps000092	W19_900	Ps000092	0.285751	A	B	A	A	B	B	-	A	B	A	B	B	B	A	A	A	B	A	A	A	A	B	B	B	A	A	A	A	A	B	-	B	-	-	B	A	A	A	A	B	B	A
Ps113213	18.1	12.9	Ps001374	Ps000092	W19_900	Ps000092	0.131668	A	B	A	A	B	B	B	A	B	A	B	B	B	A	A	A	B	A	A	A	A	B	-	-	A	A	A	A	A	B	A	B	A	-	B	A	A	A	A	B	B	A
Ps126096	18.1	12	Ps001374	Ps000092	W19_900	Ps000092	0.122823	A	B	A	A	B	B	B	A	B	A	-	-	B	A	A	A	B	A	A	A	A	B	-	B	A	A	A	A	A	B	A	B	A	-	-	A	A	A	-	B	B	A
Ps120026	18.1	12	Ps001374	Ps000092	W19_900	Ps000092	0.285751	A	B	A	A	B	B	B	A	B	A	-	B	B	-	A	A	B	A	A	A	A	B	-	B	A	A	A	A	A	B	-	B	A	B	B	A	A	A	A	B	-	A
Ps154827	18.1	10.8	Ps001374	Ps000092	W19_900	Ps000092	0.037373	A	B	A	A	-	-	B	A	B	-	-	-	B	A	-	A	B	A	A	A	A	B	A	B	A	A	A	A	-	B	A	B	A	A	B	A	A	A	A	-	B	A
Ps126778	18.1	12	Ps001374	Ps000092	W19_900	Ps000092	0.122823	A	B	A	A	B	B	B	A	B	A	B	B	B	A	A	A	B	A	A	A	A	B	B	B	A	A	A	A	A	-	A	B	A	-	-	A	A	A	A	B	B	A
Ps108495	18.1	12.3	Ps001374	Ps000092	W19_900	Ps000092	0.365712	A	B	A	A	B	B	B	A	B	A	B	B	B	A	A	A	B	-	A	A	A	B	B	B	A	A	A	A	A	B	A	B	A	-	B	A	A	A	A	B	-	A
Ps146818	18.1	11.4	Ps001374	Ps000092	Ps001466	Ps000092	0.342782	-	B	A	A	-	B	B	A	B	A	-	B	B	A	A	A	B	-	A	A	A	B	-	B	A	A	A	-	A	B	A	B	A	-	B	A	A	A	A	B	B	A
Ps148609	18.1	11.1	Ps001374	Ps000092	W19_900	Ps000092	0.205903	A	B	A	A	B	B	B	A	-	A	-	B	B	A	A	A	B	A	A	A	-	B	B	B	A	A	A	A	A	B	-	B	A	B	B	A	A	A	-	-	-	A
Ps163435	18.1	9.6	Ps001374	Ps000092	W19_900	Ps000092	0.865772	-	-	A	-	B	B	B	A	B	A	B	B	B	-	A	A	B	-	A	A	-	B	B	B	-	A	A	A	A	B	-	B	A	-	-	A	A	A	A	B	B	-
Ps158628	18.1	10.8	Ps001374	Ps000092	W19_900	Ps000092	0.0515759	A	-	A	A	B	B	B	A	B	-	B	-	B	A	A	A	B	A	A	A	A	B	-	B	A	A	A	A	A	B	A	B	A	A	B	A	A	-	A	-	-	A
Ps147365	18.1	11.1	Ps001374	Ps000092	W19_900	Ps000092	0.205903	-	-	A	A	B	B	B	A	B	A	B	-	B	A	A	A	B	-	-	A	A	B	B	B	A	A	A	A	A	B	A	B	A	-	-	A	A	A	A	-	B	A
Ps163434	18.1	9.9	Ps001374	Ps000092	W19_900	Ps000092	0.865772	A	B	-	-	B	B	B	A	B	A	-	B	-	A	A	-	B	-	A	A	-	B	B	B	-	A	A	A	A	B	-	B	A	-	B	A	-	A	A	B	B	A
Ps131816	18.1	11.7	Ps001374	Ps000092	W19_900	Ps000092	0.354539	A	B	A	A	B	-	-	A	B	A	B	B	B	A	A	A	B	A	A	A	-	B	-	B	A	A	A	A	A	B	-	B	A	B	B	A	A	A	A	B	B	A
Ps106616	18.1	12.9	Ps001374	Ps000092	W19_900	Ps000092	0.10105	A	B	A	A	B	B	B	A	B	A	B	B	B	A	A	A	-	A	A	A	A	B	-	B	A	A	A	A	A	B	A	B	A	A	B	A	A	A	A	B	B	A
Ps149899	18.1	11.4	Ps001374	Ps000092	W19_900	Ps000092	0.342782	A	B	A	-	B	-	B	A	B	A	B	B	B	A	A	A	B	A	A	A	A	B	B	B	A	-	A	A	A	-	A	B	-	-	B	A	A	A	A	B	B	A
Ps139798	18.1	11.7	Ps001374	Ps000092	W19_900	Ps000092	0.43488	-	B	A	A	B	B	B	A	B	A	-	B	B	A	A	A	B	A	-	A	A	B	B	B	A	-	A	A	A	B	A	B	A	-	B	-	A	A	A	B	B	A
Ps157710	18.1	10.5	Ps001374	Ps000092	W19_900	Ps000092	0.516412	A	B	A	A	B	B	B	A	B	-	-	B	B	A	A	A	B	-	A	-	A	-	B	B	A	A	A	A	A	B	-	B	-	A	B	-	A	A	A	B	B	-
Ps161661	18.1	9.9	Ps001374	Ps000092	W19_900	Ps000092	0.249817	A	B	A	A	B	B	B	A	B	-	-	B	B	-	A	A	-	A	A	A	A	B	A	B	A	-	A	A	-	-	A	B	A	A	B	A	-	A	-	B	-	-
Ps112908	18.1	12.6	Ps001374	Ps000092	W19_900	Ps000092	0.131668	A	B	A	A	B	B	B	A	-	A	B	B	B	A	A	A	B	A	A	A	A	B	-	B	A	A	A	A	A	B	A	-	A	-	B	A	A	A	A	B	B	A
Ps140146	18.1	11.7	Ps001374	Ps000092	W19_900	Ps000092	0.43488	A	B	A	A	B	B	B	A	B	A	B	B	B	A	-	-	B	-	A	A	A	B	B	B	A	A	A	A	A	B	A	B	A	-	B	-	A	A	A	-	B	A
Ps158644	18.1	10.8	Ps001374	Ps000092	W19_900	Ps000092	0.33039	A	B	A	A	B	B	B	A	B	A	-	B	B	A	-	A	B	A	A	A	A	B	B	B	A	A	A	A	A	-	-	B	A	-	B	A	-	-	A	B	B	A
Ps161316	18.1	10.5	Ps001374	Ps000092	W19_900	Ps000092	0.0325828	A	-	A	A	B	B	B	A	B	A	B	B	B	A	-	A	-	A	A	A	A	-	A	B	A	A	A	A	A	-	-	B	A	-	-	-	A	A	A	B	-	A
Ps108401	18.1	12	Ps001374	Ps000092	W19_900	Ps000092	0.365712	A	B	A	A	B	B	B	A	B	A	B	B	B	A	A	-	-	A	A	A	A	B	B	-	A	A	A	-	A	B	A	B	A	B	B	A	A	A	A	B	B	A
Ps159134	18.1	11.1	Ps001374	Ps000092	W19_900	Ps000092	0.194366	A	B	A	A	B	B	B	A	B	-	-	B	B	A	A	-	-	A	A	A	-	B	-	B	A	A	A	A	A	B	A	B	A	-	B	A	A	A	-	B	B	A
Ps108032	18.1	12.3	Ps001374	Ps000092	W19_900	Ps000092	0.546494	A	B	A	A	B	B	B	A	B	A	B	B	B	A	A	A	B	A	A	A	A	B	-	B	-	A	-	A	A	B	-	B	A	B	B	A	A	A	A	B	B	A
Ps106325	18.1	12.3	Ps001374	Ps000092	W19_900	Ps000092	0.654721	A	B	A	A	B	B	B	A	B	-	B	B	B	A	A	A	B	A	A	A	-	B	B	B	A	A	A	A	A	B	A	B	A	B	B	A	A	-	A	B	B	A
Ps133110	18.1	12	Ps001374	Ps000092	W19_900	Ps000092	0.122823	A	B	A	A	B	-	B	A	B	A	B	B	B	A	A	A	B	A	A	A	A	B	B	B	A	A	A	A	A	B	A	-	A	-	B	A	A	A	A	-	B	-
Ps123863	18.1	12.6	Ps001374	Ps000092	W19_900	Ps000092	0.0934478	A	B	A	A	B	B	B	A	B	A	B	B	B	A	A	A	B	A	A	A	A	B	-	B	A	A	A	A	A	-	A	B	A	-	B	A	A	A	A	-	B	A
Ps119712	18.1	12	Ps001374	Ps000092	W19_900	Ps000092	0.0934478	A	B	A	A	B	B	B	A	B	A	B	B	-	A	A	A	-	A	A	A	A	B	-	B	A	A	A	A	A	B	A	B	A	A	B	A	A	A	-	B	-	A
Ps159078	18.1	10.5	Ps001374	Ps000092	W19_900	Ps000092	0.516412	A	B	A	A	B	B	B	A	B	-	B	B	B	A	A	A	B	A	-	A	-	B	B	B	A	-	A	A	A	B	A	-	A	-	B	A	A	A	A	-	B	A
Ps104284	18.1	12.3	Ps001374	Ps000092	W19_900	Ps000092	0.179712	A	B	A	A	B	B	B	A	B	A	B	B	-	A	A	A	-	A	A	A	A	B	B	B	A	A	A	A	A	B	A	B	A	B	B	A	A	A	A	B	B	A
Ps123226	18.1	12	Ps001374	Ps000092	W19_900	Ps000092	0.647315	A	B	A	-	B	B	B	A	B	A	B	B	B	A	A	-	B	-	A	A	A	B	B	B	A	-	A	A	A	B	A	B	A	-	B	A	A	A	A	B	B	A
Ps121988	18.1	12.6	Ps001374	Ps000092	W19_900	Ps000092	0.285751	A	B	A	A	B	B	B	A	B	A	B	B	B	A	A	A	B	A	A	A	A	B	-	B	A	A	A	A	A	B	A	B	A	-	B	A	A	A	A	B	B	A
Ps159453	18.1	11.1	Ps001374	Ps000092	W19_900	Ps000092	0.194366	A	B	A	-	B	-	B	A	B	A	-	B	-	A	A	A	B	A	A	A	A	B	-	B	A	A	A	A	A	B	A	B	-	-	B	-	A	A	A	B	B	A
Ps111319	18.1	12.6	Ps001374	Ps000092	W19_900	Ps000092	0.2278	A	B	A	A	B	B	B	A	B	A	B	B	B	A	A	A	B	A	A	A	A	B	B	B	A	A	A	A	-	B	A	B	A	-	B	A	A	A	A	B	-	A
Ps118458	18.1	12	Ps001374	Ps000092	W19_900	Ps000092	0.285751	A	B	A	A	B	B	B	A	B	A	B	B	-	A	-	A	B	A	-	A	A	B	-	B	A	A	A	A	A	B	A	B	A	A	B	A	A	A	A	B	B	A
Ps155154	18.1	11.1	Ps001374	Ps000092	Ps001466	Ps000092	0.42334	-	B	A	-	-	B	B	A	B	A	B	B	B	A	A	A	B	A	A	A	A	-	-	B	A	A	A	-	-	B	A	B	A	-	B	A	-	A	A	B	B	A
Ps137648	18.1	11.7	Ps001374	Ps000092	W19_900	Ps000092	0.43488	A	-	A	A	B	B	B	A	B	-	B	B	B	A	A	A	B	A	A	A	A	B	-	B	A	A	A	A	A	B	-	B	-	B	B	A	A	A	-	B	B	A
Ps159970	18.1	11.1	Ps001374	Ps000092	W19_900	Ps000092	0.516412	A	B	A	A	B	B	B	A	B	A	B	B	B	A	A	A	B	-	A	-	A	-	-	B	A	A	A	-	A	B	A	B	A	-	B	A	A	-	A	B	B	A
Ps121154	18.1	12.6	Ps001374	Ps000092	W19_900	Ps000092	0.169912	A	B	A	A	B	B	B	A	B	-	B	B	B	A	A	A	B	A	A	A	A	B	-	-	A	A	A	A	A	B	A	B	A	-	B	A	A	A	A	B	B	A
Ps129252	18.1	11.7	Ps001374	Ps000092	W19_900	Ps000092	0.354539	A	B	A	A	B	B	B	A	B	A	B	B	-	A	A	-	B	A	A	A	A	B	-	B	A	A	-	-	A	B	A	B	A	A	B	A	A	A	A	B	B	A
Ps150478	18.1	11.7	Ps001374	Ps000092	W19_900	Ps000092	0.342782	A	B	A	A	B	B	B	A	B	A	B	B	B	A	A	A	B	A	A	A	A	-	-	B	A	A	-	A	A	B	A	B	-	-	B	-	A	A	-	B	B	A
Ps106560	18.1	12.9	Ps001374	Ps000092	W19_900	Ps000092	0.296718	A	B	-	A	B	B	B	A	-	A	B	B	B	A	A	A	B	A	A	A	A	B	-	B	A	A	A	A	A	B	A	B	A	B	B	A	A	A	A	B	B	A
Ps102397	18.1	12.6	Ps001374	Ps000092	W19_900	Ps000092	0.376344	A	B	A	A	B	B	B	-	B	A	B	B	B	A	A	A	B	A	A	A	A	B	B	B	A	A	A	A	A	B	-	B	A	A	B	A	A	A	A	B	B	A
Ps120149	18.1	12.3	Ps001374	Ps000092	W19_900	Ps000092	0.169912	-	B	A	A	B	B	B	A	B	A	B	B	B	A	A	A	B	A	A	A	A	B	-	B	A	A	A	A	A	B	A	-	A	B	B	A	A	A	A	B	B	A
Ps129732	18.1	12	Ps001374	Ps000092	W19_900	Ps000092	0.122823	A	B	A	A	B	B	B	-	B	A	B	B	-	A	A	A	B	A	A	A	A	B	-	B	A	A	A	A	A	B	A	-	A	-	B	A	A	A	A	-	B	A
Ps160631	18.1	10.2	Ps001374	Ps000092	W19_900	Ps000092	0.138982	A	-	A	-	B	B	B	A	B	A	B	B	B	A	A	-	B	A	-	A	A	B	B	-	A	A	A	A	A	B	A	B	A	A	-	A	A	A	-	-	B	A
Ps149517	18.1	11.7	Ps001374	Ps000092	W19_900	Ps000092	0.527089	A	B	-	A	B	B	B	-	B	A	-	B	B	A	A	A	B	A	A	-	A	B	-	B	A	A	A	A	A	B	A	B	A	B	B	A	A	A	-	B	B	-
Ps103926	18.1	12.6	Ps001374	Ps000092	W19_900	Ps000092	0.296718	A	B	A	A	B	B	B	A	B	-	B	B	B	A	A	-	B	A	A	A	A	B	-	B	A	A	A	A	A	B	A	B	A	A	B	A	A	A	A	B	B	A
Ps127044	18.1	12	Ps001374	Ps000092	W19_900	Ps000092	0.354539	A	B	-	-	B	B	B	A	B	-	B	B	B	A	A	A	B	A	A	A	A	B	B	-	A	A	A	A	A	B	A	B	A	-	B	A	A	A	A	B	B	A
Ps133750	18.1	12	Ps001374	Ps000092	W19_900	Ps000092	0.354539	A	B	-	A	B	B	B	A	B	A	B	B	B	A	A	A	B	A	A	A	A	B	A	B	-	A	-	A	A	B	A	B	A	B	B	-	A	A	A	B	B	A
Ps114587	18.1	12.3	Ps001374	Ps000092	W19_900	Ps000092	0.445766	A	B	-	A	B	B	B	A	B	A	B	B	B	A	A	A	B	A	A	A	A	B	B	B	A	-	A	A	-	B	A	B	A	B	B	A	A	A	A	-	B	A
Ps114039	18.1	12.3	Ps001374	Ps000092	W19_900	Ps000092	0.2278	-	B	A	A	B	B	B	A	-	A	B	B	B	A	A	A	B	A	A	A	A	B	B	B	A	A	A	A	A	B	A	-	A	B	B	A	A	A	A	B	B	A
Ps134237	18.1	11.7	Ps001374	Ps000092	W19_900	Ps000092	0.537094	A	B	A	A	B	B	B	A	B	A	B	B	B	A	A	-	B	-	A	A	A	B	-	B	A	A	-	-	A	B	A	B	A	B	-	A	A	A	A	B	B	A
Ps149852	18.1	11.7	Ps001374	Ps000092	W19_900	Ps000092	0.205903	A	B	A	A	B	B	B	-	B	-	B	B	B	A	A	A	B	A	-	A	A	B	-	B	A	A	A	A	A	B	A	-	A	-	B	A	A	A	A	B	-	A
Ps153699	18.1	11.4	Ps001374	Ps000092	Ps124536	Ps000092	0.87278	-	B	B	A	B	B	B	A	B	A	B	B	-	A	-	A	-	A	A	A	A	B	B	B	A	-	-	A	A	B	A	B	A	-	B	A	A	A	A	B	B	A
Ps126334	18.1	11.7	Ps001374	Ps000092	Ps001466	Ps000092	0.354539	-	B	A	A	B	B	B	A	B	A	-	B	B	-	A	A	B	A	A	A	A	B	A	B	A	-	A	A	A	B	-	B	A	-	B	A	A	A	A	B	B	A
Ps146307	18.1	11.4	Ps001374	Ps000092	W19_900	Ps000092	0.75183	A	B	A	A	B	B	B	A	B	A	B	B	B	A	A	A	B	-	A	-	A	B	-	B	A	-	A	A	-	B	A	B	-	-	B	A	A	A	-	B	B	A
Ps125212	18.1	11.4	Ps001374	Ps000092	W19_900	Ps000092	0.757621	A	B	A	A	B	B	-	A	B	A	B	B	B	A	A	A	B	A	A	A	-	B	B	B	-	A	A	-	A	B	A	B	A	B	B	-	-	A	A	B	B	A
Ps106330	18.1	12.9	Ps001374	Ps000092	W19_900	Ps000092	0.179712	A	B	A	A	B	B	B	A	B	A	B	B	B	A	A	A	B	A	A	A	A	B	-	B	A	A	A	A	A	B	A	B	A	-	B	A	A	A	A	-	B	A
Ps110734	18.1	12.9	Ps001374	Ps000092	W19_900	Ps000092	0.131668	A	B	A	A	B	B	B	A	B	A	B	B	-	A	A	A	B	A	A	A	A	B	-	B	A	A	A	A	A	B	A	B	A	-	B	A	A	A	A	B	B	A
Ps148492	18.1	11.4	Ps001374	Ps000092	W19_900	Ps000092	0.205903	A	B	A	A	B	B	B	A	B	A	-	B	-	A	A	A	-	A	A	A	A	B	-	B	A	A	-	A	A	B	A	B	A	-	B	A	A	A	-	B	B	A
Ps120021	18.1	12	Ps001374	Ps000092	W19_900	Ps000092	0.285751	A	B	A	A	B	B	B	A	B	A	B	B	B	A	A	A	-	A	A	A	A	B	B	B	-	A	A	A	A	B	A	B	A	-	-	A	A	A	A	B	B	A
Ps132321	18.1	12	Ps001374	Ps000092	W19_900	Ps000092	0.354539	A	B	A	A	B	B	B	A	B	-	B	B	B	A	A	A	B	A	A	A	A	B	B	B	A	A	A	A	A	B	A	-	A	-	B	A	A	A	-	B	B	A
Ps130166	18.1	11.7	Ps001374	Ps000092	W19_900	Ps000092	0.354539	A	B	A	A	B	B	B	A	B	A	B	B	B	A	A	A	-	A	A	A	-	B	-	B	A	A	-	-	A	B	A	B	A	A	B	A	A	A	A	B	B	A
Ps113689	18.1	12.9	Ps001374	Ps000092	W19_900	Ps000092	0.2278	A	B	A	A	B	B	B	A	B	A	B	B	B	A	A	A	B	A	A	A	A	B	-	B	A	A	A	A	-	B	A	B	A	-	B	A	A	A	A	B	B	A
Ps154250	18.1	11.1	Ps001374	Ps000092	W19_900	Ps000092	0.630954	A	B	A	-	B	B	B	-	B	A	B	B	B	A	A	-	B	A	A	A	A	B	-	B	A	A	A	A	-	-	A	B	A	-	B	A	A	-	A	B	B	A
Ps121360	18.1	12	Ps001374	Ps000092	W19_900	Ps000092	0.285751	A	B	A	A	B	B	B	A	B	A	B	B	B	A	A	A	B	A	A	A	A	B	-	B	A	A	A	-	A	B	-	B	A	A	-	A	-	A	A	B	B	A
Ps121202	18.1	12.3	Ps001374	Ps000092	W19_900	Ps000092	0.169912	A	B	A	A	B	B	B	A	B	-	-	B	B	A	A	A	B	A	A	A	A	B	-	B	A	A	A	A	A	B	A	B	A	-	B	A	A	A	A	B	B	A
Ps116324	18.1	12.3	Ps001374	Ps000092	W19_900	Ps000092	0.445766	A	B	A	A	B	B	B	A	B	-	B	B	B	A	A	A	B	A	A	A	A	B	-	B	A	A	A	A	A	B	A	B	A	-	B	-	A	A	A	B	B	A
Ps103114	18.1	12.6	Ps001374	Ps000092	W19_900	Ps000092	0.179712	A	B	A	A	B	B	B	A	B	A	B	B	B	A	A	A	B	A	A	A	A	B	B	B	A	A	A	A	A	-	A	B	A	-	-	A	A	A	A	B	B	A
Ps144007	18.1	11.7	Ps001374	Ps000092	W19_900	Ps000092	0.274299	A	B	A	A	B	-	B	-	B	A	B	B	B	A	A	A	B	A	A	A	A	B	-	B	A	A	A	-	-	B	-	B	A	-	B	A	A	A	A	B	B	A
Ps128042	18.1	12	Ps001374	Ps000092	W19_900	Ps000092	0.217044	A	B	A	A	B	B	B	-	B	A	-	B	B	A	A	A	B	A	A	A	A	B	-	B	A	A	A	A	A	B	A	B	A	A	B	-	A	A	A	B	B	A
Ps150849	18.1	11.4	Ps001374	Ps000092	W19_900	Ps000092	0.527089	A	-	-	A	B	B	B	A	B	A	B	B	B	A	A	A	B	-	A	A	A	B	B	-	A	A	-	A	A	B	A	B	A	B	B	A	A	A	A	B	B	-
Ps103397	18.1	12.3	Ps001374	Ps000092	W19_900	Ps000092	0.296718	A	B	A	A	B	-	-	A	B	A	B	B	B	A	A	A	B	A	A	A	A	B	B	B	A	A	A	-	A	B	A	B	A	B	B	A	A	A	A	B	B	A
Ps137396	18.1	11.1	Ps001374	Ps000092	W19_900	Ps000092	0.639412	A	B	A	A	B	B	B	A	B	A	B	B	B	A	A	A	B	A	A	A	A	B	B	B	A	A	A	A	A	-	A	B	-	B	B	A	A	A	-	-	B	A
Ps133499	18.1	12.3	Ps001374	Ps000092	W19_900	Ps000092	0.122823	A	B	A	A	B	B	B	A	B	A	B	B	B	A	A	A	B	A	A	A	A	B	-	B	A	A	A	A	A	-	A	B	A	-	-	A	A	A	-	B	B	A
Ps106740	18.1	12.9	Ps001374	Ps000092	W19_900	Ps000092	0.296718	A	B	A	A	B	B	B	A	B	A	B	B	B	A	A	A	B	A	A	A	A	B	-	B	A	A	A	A	A	B	A	B	A	-	B	A	A	A	-	B	B	A
Ps129764	18.1	11.7	Ps001374	Ps000092	W19_900	Ps000092	0.122823	A	B	A	A	B	B	B	A	B	A	-	-	B	A	-	-	B	A	A	A	A	B	-	B	A	A	A	A	A	B	A	B	A	A	-	A	A	A	A	B	B	A
Ps136010	18.1	12	Ps001374	Ps000092	W19_900	Ps000092	0.274299	A	B	A	-	-	B	B	A	B	A	B	B	B	A	A	A	B	A	A	A	A	B	-	B	A	A	A	A	A	B	-	B	A	-	B	A	-	A	A	B	B	A
Ps120167	18.1	11.7	Ps001374	Ps000092	W19_900	Ps000092	0.285751	A	B	A	A	B	B	B	A	B	A	B	B	-	A	A	A	B	A	A	A	-	B	B	B	A	A	A	A	A	B	-	B	A	A	B	A	A	A	A	B	B	A
Ps107973	18.1	12	Ps001374	Ps000092	W19_900	Ps000092	0.546494	A	B	A	A	B	B	B	A	B	-	B	B	B	A	A	-	B	A	A	A	A	B	B	B	A	A	A	A	A	B	A	B	A	A	B	A	-	A	-	B	B	A
Ps132953	18.1	12	Ps001374	Ps000092	W19_900	Ps000092	0.354539	A	B	A	A	B	B	B	A	B	A	B	B	B	A	A	A	B	A	A	A	A	B	-	-	A	-	A	A	A	B	A	B	A	-	B	A	-	-	A	B	B	A
Ps144139	18.1	11.4	Ps001374	Ps000092	W19_900	Ps000092	0.43488	-	B	A	A	B	B	B	A	B	-	B	B	B	A	A	A	B	A	A	A	A	B	A	B	A	A	A	A	-	-	A	B	A	B	B	-	A	A	-	B	B	A
Ps123150	18.1	12.3	Ps001374	Ps000092	W19_900	Ps000092	0.445766	A	B	A	A	B	B	B	A	B	A	B	B	B	A	A	A	B	A	-	A	A	B	-	B	A	A	A	A	A	B	A	B	A	B	B	A	A	A	A	B	B	-
Ps155583	18.1	11.1	Ps001374	Ps000092	W19_900	Ps000092	0.262332	A	B	A	A	-	B	B	A	-	-	B	B	B	A	-	A	B	-	A	A	A	B	-	B	A	A	A	A	A	B	-	B	A	-	B	A	A	A	A	B	-	A
Ps119083	18.1	12	Ps001374	Ps000092	W19_900	Ps000092	0.169912	A	B	A	A	B	B	B	A	B	A	B	-	B	A	A	A	-	A	A	A	A	B	B	B	A	A	A	-	A	B	A	B	A	-	B	A	A	A	A	-	B	A
Ps103660	18.1	12.3	Ps001374	Ps000092	W19_900	Ps000092	0.296718	A	B	A	A	B	-	B	A	B	A	B	B	B	A	A	A	B	A	A	-	A	B	B	B	A	A	A	A	A	B	A	B	A	B	-	A	A	A	A	B	B	A
Ps122445	18.1	12.6	Ps001374	Ps000092	W19_900	Ps000092	0.169912	A	-	A	A	B	B	B	A	B	A	B	B	B	A	A	A	B	A	A	A	A	B	-	B	A	A	A	A	A	B	A	B	A	-	B	A	A	A	A	B	B	A
Ps124531	18.1	11.4	Ps001374	Ps000092	W19_900	Ps000092	0.217044	-	B	A	A	B	B	B	A	B	-	-	B	B	-	A	A	B	A	A	A	A	B	B	B	A	A	A	A	A	-	A	B	A	A	-	A	A	A	A	B	B	A
Ps143099	18.1	11.7	Ps001374	Ps000092	W19_900	Ps000092	0.159854	A	B	A	A	B	B	B	A	B	A	B	B	-	A	A	A	B	-	A	A	-	B	-	B	A	A	A	A	-	B	A	B	A	A	-	A	A	A	A	B	B	A
Ps118700	18.1	12	Ps001374	Ps000092	W19_900	Ps000092	0.169912	A	B	A	A	B	B	B	A	B	A	B	B	B	A	A	-	B	A	A	A	A	-	-	B	A	A	A	A	-	B	A	B	A	A	B	A	A	A	A	-	B	A
Ps159777	18.1	10.8	Ps001374	Ps000092	Ps001466	Ps000092	0.0231409	-	B	A	-	-	B	B	A	B	A	B	B	B	A	A	A	-	A	A	A	A	B	-	B	A	A	A	A	A	-	A	-	A	A	B	A	A	A	A	B	B	A
Ps155322	18.1	10.8	Ps001374	Ps000092	W19_900	Ps000092	0.42334	A	B	A	A	B	B	-	A	B	A	B	B	B	A	A	A	B	A	A	-	-	B	B	B	A	A	A	A	A	-	-	B	A	-	B	A	A	A	-	B	B	A
Ps145865	18.1	11.1	Ps001374	Ps000092	W19_900	Ps000092	0.113846	A	-	A	-	B	B	B	A	B	A	-	B	B	A	A	A	B	A	A	A	A	B	-	B	A	A	-	A	A	B	A	B	A	A	B	-	A	A	A	B	-	A
Ps139946	18.1	12	Ps001374	Ps000092	W19_900	Ps000092	0.274299	A	-	A	A	B	B	B	A	B	A	B	B	B	A	A	A	B	A	A	A	A	B	-	B	A	A	-	A	A	B	A	B	A	-	B	A	A	-	-	B	B	A
Ps142924	18.1	11.7	Ps001374	Ps000092	W19_900	Ps000092	0.43488	A	B	A	A	B	B	B	A	B	A	B	B	B	A	A	A	B	A	A	A	A	-	B	B	A	-	-	A	A	B	A	B	A	-	B	-	-	A	A	B	B	A
Ps103014	18.1	12.3	Ps001374	Ps000092	W19_900	Ps000092	0.296718	A	B	A	A	B	B	B	A	B	A	B	-	B	A	A	A	B	A	A	A	A	B	B	B	A	A	A	A	A	B	A	-	A	B	B	A	A	A	A	B	B	A
Ps133418	18.1	11.7	Ps001374	Ps000092	W19_900	Ps000092	0.354539	A	B	A	A	B	B	B	A	B	A	B	B	B	A	A	A	B	A	A	A	-	B	A	B	A	A	-	A	A	B	-	-	A	-	B	A	-	A	A	B	B	A
Ps142420	18.1	12	Ps001374	Ps000092	W19_900	Ps000092	0.0858128	A	B	A	A	B	B	B	A	B	A	B	B	B	A	-	A	B	A	A	A	A	B	-	-	A	A	A	A	A	-	A	B	A	-	B	A	A	A	A	B	-	A
Ps129026	18.1	11.4	Ps001374	Ps000092	W19_900	Ps000092	0.122823	A	-	A	A	B	B	-	A	B	A	B	B	B	A	A	-	B	A	A	A	A	B	B	B	A	A	A	-	A	-	A	B	A	A	B	A	A	A	A	-	B	A
Ps113310	18.1	12.3	Ps001374	Ps000092	W19_900	Ps000092	0.546494	A	B	A	A	B	B	B	A	B	A	B	B	B	A	A	A	B	-	A	A	A	B	B	B	A	A	A	A	A	B	A	B	A	-	B	A	-	-	A	B	B	A
Ps144194	18.1	11.7	Ps001374	Ps000092	W19_900	Ps000092	0.43488	-	B	A	A	B	B	B	A	B	A	B	B	B	A	A	A	B	A	A	A	A	B	B	B	A	A	A	A	A	B	-	B	A	-	B	A	-	A	-	B	-	A
Ps110772	18.1	12.3	Ps001374	Ps000092	Ps001466	Ps000092	0.365712	-	B	A	A	B	B	B	A	B	A	B	B	B	A	A	A	B	A	-	A	A	B	-	B	A	A	A	A	-	B	A	B	A	A	B	A	A	A	A	B	B	A
Ps112401	18.1	12.3	Ps001374	Ps000092	W19_900	Ps000092	0.0704404	A	B	A	A	B	-	B	A	B	A	-	B	B	A	A	A	B	A	A	A	A	-	B	B	A	A	A	A	A	B	A	B	A	A	B	A	A	A	A	B	B	A
Ps156163	18.1	11.4	Ps001374	Ps000092	W19_900	Ps000092	0.42334	A	B	A	A	B	B	B	A	-	-	B	B	B	A	A	A	B	A	A	A	A	B	-	B	A	A	A	-	A	B	A	B	-	-	B	-	A	A	-	B	B	A
Ps112032	18.1	12	Ps001374	Ps000092	W19_900	Ps000092	0.131668	A	B	A	A	B	-	B	A	-	A	B	B	B	A	A	A	B	A	A	A	A	B	B	B	A	A	A	A	-	B	A	B	A	A	B	A	A	A	A	B	B	A
Ps153208	18.1	11.4	Ps001374	Ps000092	Ps001466	Ps000092	0.262332	-	B	A	A	B	B	B	A	B	-	B	B	-	-	A	A	B	A	A	A	A	B	-	B	A	A	A	A	A	-	A	B	A	-	B	A	A	A	A	B	B	-
Ps112029	18.1	12.3	Ps001374	Ps000092	W19_900	Ps000092	0.2278	A	B	A	A	B	-	B	A	B	A	B	B	B	A	A	A	B	A	-	A	A	B	B	B	A	A	A	A	A	B	A	B	A	-	B	A	A	A	A	B	B	A
Ps111766	18.1	12.6	Ps001374	Ps000092	W19_900	Ps000092	0.2278	A	B	A	A	B	B	B	A	B	A	B	B	-	A	-	A	B	A	A	A	A	B	-	B	A	A	A	A	A	B	A	B	A	-	B	A	A	A	A	B	B	A
Ps100653	18.1	12.9	Ps001374	Ps000092	W19_900	Ps000092	0.465803	A	B	A	A	B	B	B	A	B	-	B	B	B	A	A	A	B	A	A	A	A	B	B	B	A	A	A	A	A	B	A	B	A	B	B	A	A	A	A	B	B	A
Ps161203	18.1	10.8	Ps001374	Ps000092	W19_900	Ps000092	0.249817	A	B	-	A	-	B	B	-	B	A	B	B	B	A	-	A	-	A	A	A	A	B	-	B	A	-	A	A	-	-	A	B	A	B	B	A	A	A	A	B	-	A
Ps151678	18.1	11.1	Ps001374	Ps000092	W19_900	Ps000092	0.527089	A	B	A	A	B	B	B	A	B	-	B	B	B	A	A	-	B	A	A	A	A	-	-	B	A	-	A	A	A	B	-	B	A	A	B	A	A	A	-	B	B	A
Ps117453	18.1	12	Ps001374	Ps000092	W19_900	Ps000092	0.647315	A	B	A	A	B	B	B	-	B	A	B	B	B	A	A	A	B	A	A	-	A	B	B	B	A	A	A	A	-	B	A	B	A	-	B	A	A	-	A	B	B	A
Ps162565	18.1	10.2	Ps001374	Ps000092	W19_900	Ps000092	0.738883	A	B	-	A	B	B	B	A	B	-	B	B	B	A	A	A	B	A	A	-	A	B	B	B	A	A	A	-	A	-	A	-	A	-	B	-	-	A	-	B	B	A
Ps159619	18.1	11.4	Ps001374	Ps000092	W19_900	Ps000092	0.745603	A	B	-	A	B	B	B	A	B	-	B	B	B	A	A	-	B	A	A	A	A	B	-	B	A	A	A	A	-	B	-	B	A	-	B	A	A	A	A	B	B	A
Ps114782	18.1	12.3	Ps001374	Ps000092	W19_900	Ps000092	0.285751	A	B	A	A	B	B	B	A	B	A	B	B	B	A	A	-	B	A	A	A	A	B	B	B	A	A	A	A	A	B	-	B	A	-	-	A	A	A	A	B	B	A
Ps146032	18.1	10.8	Ps001374	Ps000092	W19_900	Ps000092	0.527089	A	B	A	A	B	B	B	A	B	A	B	B	-	A	A	A	B	A	A	-	A	B	B	B	A	-	A	A	A	B	-	B	-	B	-	A	A	A	A	B	-	A
Ps125857	18.1	11.4	Ps001374	Ps000092	W19_900	Ps000092	0.217044	-	-	A	A	B	B	B	A	B	A	B	-	-	A	A	A	-	A	A	A	A	B	B	B	A	-	A	A	A	B	A	B	A	B	B	A	A	A	A	B	B	A
Ps123648	18.1	12.3	Ps001374	Ps000092	Ps001466	Ps000092	0.445766	-	B	A	-	B	B	B	A	B	A	B	B	B	-	A	A	B	A	A	A	A	B	-	B	A	A	A	A	A	B	A	B	A	-	B	A	A	A	A	B	B	A
Ps113135	18.1	12.3	Ps001374	Ps000092	Ps001466	Ps000092	0.2278	-	-	A	A	B	B	B	A	B	A	B	B	B	A	A	A	B	-	A	A	A	B	-	B	A	A	A	A	A	B	A	B	A	A	B	A	A	A	A	B	B	A
Ps133723	18.1	12	Ps001374	Ps000092	W19_900	Ps000092	0.537094	A	B	A	A	B	B	B	A	B	A	B	B	B	A	A	A	B	A	A	A	A	B	B	B	-	A	A	A	-	B	A	B	A	-	B	A	A	A	-	B	B	A
Ps112564	18.1	12.6	Ps001374	Ps000092	W19_900	Ps000092	0.2278	A	B	A	A	B	B	B	A	B	A	B	B	B	A	A	A	B	A	-	A	A	-	-	B	A	A	A	A	A	B	A	B	A	B	B	A	A	A	A	B	B	A
Ps145656	18.1	11.4	Ps001374	Ps000092	W19_900	Ps000092	0.527089	A	B	A	A	B	B	B	A	B	A	B	B	B	A	-	A	B	A	A	-	A	B	B	B	A	-	A	A	-	B	A	B	A	-	B	A	A	A	A	B	-	A
Ps110888	18.1	12.6	Ps001374	Ps000092	W19_900	Ps000092	0.2278	A	B	A	A	B	B	B	A	B	A	B	B	B	A	A	A	-	A	A	A	A	B	-	B	A	A	A	A	A	B	A	B	A	-	B	A	A	A	A	B	B	A
Ps149009	18.1	11.1	Ps001374	Ps000092	W19_900	Ps000092	0.113846	-	B	A	A	B	B	B	A	B	-	-	B	-	A	A	A	B	A	A	A	A	B	-	B	A	A	A	A	A	B	A	-	A	B	-	A	A	A	A	B	-	A
Ps159465	18.1	11.1	Ps001374	Ps000092	W19_900	Ps000092	0.33039	A	B	A	A	B	B	B	A	B	-	B	-	B	A	A	A	B	A	A	A	A	B	-	B	A	A	A	A	-	B	-	B	A	-	B	A	-	A	-	B	B	A
Ps135840	18.1	11.1	Ps001374	Ps000092	W19_900	Ps000092	0.274299	A	B	A	A	B	-	B	A	B	A	-	-	B	A	A	A	B	A	A	A	A	B	B	B	A	A	A	A	A	B	A	B	-	B	B	-	A	A	-	B	B	A
Ps138808	18.1	11.7	Ps001374	Ps000092	W19_900	Ps000092	0.43488	A	B	A	A	B	B	B	A	B	A	B	B	B	A	A	A	B	A	A	A	A	B	-	B	A	-	-	A	A	B	A	B	A	-	B	A	A	A	-	B	-	A
Ps153553	18.1	11.4	Ps001374	Ps000092	W19_900	Ps000092	0.262332	A	B	A	A	B	B	B	A	B	A	B	B	B	A	A	-	B	A	-	A	A	-	-	-	A	A	A	A	A	B	-	B	A	-	B	A	A	A	A	B	B	A
Ps121322	18.1	12	Ps001374	Ps000092	W19_900	Ps000092	0.445766	A	B	-	A	B	B	-	A	B	A	B	B	B	-	A	A	B	A	A	A	A	B	B	B	A	-	A	A	A	-	A	B	A	B	B	A	A	A	A	B	B	A
Ps119651	18.1	12	Ps001374	Ps000092	W19_900	Ps000092	0.445766	A	B	A	A	B	B	B	-	B	A	B	B	B	A	A	A	B	A	A	A	A	B	-	B	A	A	A	A	A	B	A	B	A	B	B	A	A	A	A	B	B	-
Ps162483	18.1	9.9	Ps001374	Ps000092	W19_900	Ps000092	0.504985	A	B	A	A	B	B	B	A	B	-	-	B	B	A	A	-	B	A	A	-	-	B	-	-	A	A	A	A	-	B	-	B	A	A	B	A	-	A	-	-	B	A
Ps112651	18.1	12.3	Ps001374	Ps000092	W19_900	Ps000092	0.365712	A	B	A	A	B	B	B	A	B	A	B	B	B	A	A	-	B	A	A	A	A	B	B	B	A	A	A	-	A	B	A	-	A	-	B	A	A	A	A	B	B	A
Ps147438	18.1	11.4	Ps001374	Ps000092	W19_900	Ps000092	0.342782	A	B	A	A	B	B	B	A	B	A	B	B	B	A	A	A	B	A	-	A	A	B	B	B	A	A	-	A	A	B	A	B	A	-	B	A	-	A	A	-	-	-
Ps132322	18.1	12.3	Ps001374	Ps000092	W19_900	Ps000092	0.122823	A	B	A	A	-	B	B	A	B	A	B	B	B	A	A	A	B	A	A	A	A	B	-	-	A	A	A	A	-	B	A	B	A	-	B	A	A	A	A	B	B	A
Ps160697	18.1	10.5	Ps001374	Ps000092	W19_900	Ps000092	0.138982	A	B	A	A	B	B	-	A	B	A	-	B	B	A	A	A	B	A	A	A	A	B	-	-	A	A	A	A	A	-	-	B	A	-	B	-	A	A	-	B	-	A
Ps161152	18.1	10.5	Ps001374	Ps000092	Ps124536	Ps000092	0.249817	-	B	A	A	B	B	B	A	-	A	B	B	B	A	A	A	B	A	A	A	A	-	-	-	-	A	-	A	A	B	A	B	-	-	B	-	A	A	A	B	B	A
Ps152903	18.1	10.8	Ps001374	Ps000092	W19_900	Ps000092	0.42334	A	B	A	A	B	B	-	A	-	A	B	B	B	A	A	A	B	A	-	A	A	B	B	-	A	A	A	A	A	B	-	B	A	B	B	A	A	A	-	B	B	A
Ps158392	18.1	10.5	Ps001374	Ps000092	W19_900	Ps000092	0.33039	-	B	A	A	B	B	B	-	B	A	-	B	B	A	-	A	B	A	A	A	A	B	B	B	A	A	A	A	A	B	-	B	A	B	B	A	A	-	A	B	-	A
Ps105824	18.1	12.6	Ps001374	Ps000092	W19_900	Ps000092	0.296718	A	B	A	A	B	B	B	A	B	A	B	B	B	A	A	A	B	A	A	A	-	B	-	B	A	A	A	A	A	B	A	B	A	B	B	A	A	A	A	B	B	A
Ps139252	18.1	11.4	Ps001374	Ps000092	W19_900	Ps000092	0.639412	A	B	A	A	B	B	B	-	B	A	B	B	B	A	A	-	B	-	A	A	A	B	-	B	A	A	A	A	A	B	A	B	A	B	B	-	A	-	A	B	B	A
Ps142982	18.1	11.7	Ps001374	Ps000092	W19_900	Ps000092	0.274299	A	B	A	A	B	B	B	A	B	A	B	B	B	A	-	-	B	A	A	A	A	B	A	B	A	A	A	A	-	B	-	B	A	-	B	A	A	A	A	-	B	A
Ps133458	18.1	12	Ps001374	Ps000092	W19_900	Ps000092	0.217044	A	B	A	A	B	B	B	A	B	A	B	B	B	A	A	A	B	A	A	A	A	B	-	-	-	A	A	A	A	B	A	B	A	B	-	A	A	A	-	B	B	A
Ps145748	18.1	11.1	Ps001374	Ps000092	W19_900	Ps000092	0.527089	A	B	A	-	B	B	B	A	B	-	B	B	B	A	A	-	B	A	A	A	A	B	B	B	A	A	A	A	A	B	-	B	A	-	-	-	A	A	A	B	-	A
Ps143051	18.1	11.1	Ps001374	Ps000092	W19_900	Ps000092	0.274299	A	B	A	A	-	B	B	A	B	A	-	B	B	A	-	A	-	A	A	A	-	B	B	B	A	A	A	A	A	B	A	-	A	B	B	A	A	A	A	B	B	A
Ps125159	18.1	11.7	Ps001374	Ps000092	W19_900	Ps000092	0.354539	A	B	A	A	B	B	B	A	B	A	B	B	B	A	A	A	-	-	A	A	A	B	B	B	A	-	A	A	A	-	A	B	-	-	B	A	A	A	A	B	B	A
Ps116655	18.1	12.3	Ps001374	Ps000092	W19_900	Ps000092	0.445766	A	B	A	A	B	B	B	A	B	A	B	B	B	A	-	A	B	A	-	A	A	B	-	B	A	A	A	A	A	B	A	B	A	-	B	-	A	A	A	B	B	A
Ps153042	18.1	11.1	Ps001374	Ps000092	W19_900	Ps000092	0.037373	A	B	A	A	B	B	-	A	B	A	-	B	-	A	A	-	-	A	A	A	A	B	B	-	A	A	A	A	A	B	A	B	A	-	B	A	A	A	A	B	B	A
Ps133884	18.1	11.7	Ps001374	Ps000092	W19_900	Ps000092	0.537094	A	B	A	-	B	B	B	A	B	A	B	B	B	A	-	A	B	A	A	A	A	B	B	B	A	A	A	A	A	B	A	B	A	-	B	A	-	A	A	B	B	-
Ps140216	18.1	11.4	Ps001374	Ps000092	Ps124536	Ps000092	0.274299	-	B	A	A	B	B	B	-	B	A	B	-	B	A	A	A	-	A	A	A	A	B	-	B	A	A	-	A	A	B	A	B	A	A	B	A	-	A	A	B	B	A
Ps154525	18.1	10.8	Ps001374	Ps000092	W19_900	Ps000092	0.42334	A	B	A	A	B	B	B	A	-	-	B	B	B	A	-	A	B	A	A	A	A	B	B	B	A	A	A	A	-	B	A	B	A	-	-	A	-	A	-	-	B	A
Ps163627	18.1	9.6	Ps001374	Ps000092	W19_900	Ps000092	0.236724	A	B	A	A	-	B	B	A	B	A	B	B	B	A	-	A	-	-	A	-	-	B	B	-	A	A	A	A	A	-	A	B	A	-	B	A	A	-	A	B	-	A
Ps109107	18.1	12.3	Ps001374	Ps000092	W19_900	Ps000092	0.131668	A	B	A	A	B	B	B	A	B	A	-	-	B	A	A	A	B	A	A	A	A	B	-	-	A	A	A	A	A	B	A	B	A	B	B	A	A	A	A	B	B	A
Ps151031	18.1	11.1	Ps001374	Ps000092	W19_900	Ps000092	0.342782	A	B	A	A	B	B	B	A	-	A	B	B	B	A	A	-	B	A	A	-	A	B	B	B	A	A	A	A	-	-	A	B	A	B	B	-	A	A	A	-	B	A
Ps158325	18.1	10.5	Ps001374	Ps000092	W19_900	Ps000092	0.33039	A	B	A	-	B	-	-	A	B	A	B	B	B	A	A	-	B	A	A	-	A	B	-	B	A	A	A	A	A	B	A	-	A	B	B	A	A	A	A	-	B	-
Ps123649	18.1	12	Ps001374	Ps000092	W19_900	Ps000092	0.445766	A	B	A	A	B	B	B	A	B	A	B	B	-	A	A	A	B	A	A	-	A	B	B	B	A	A	A	A	A	B	A	B	A	B	B	A	A	A	A	B	B	-
Ps113178	18.1	12.3	Ps001374	Ps000092	W19_900	Ps000092	0.2278	A	B	A	A	B	B	B	A	B	A	B	B	B	A	A	A	B	A	A	-	A	B	-	B	A	A	A	-	A	B	A	B	A	A	B	A	A	A	A	B	B	A
Ps136854	18.1	11.1	Ps001374	Ps000092	W19_900	Ps000092	0.43488	A	B	A	A	B	B	B	A	B	A	B	-	B	A	A	-	-	-	A	A	A	B	B	B	A	-	A	A	A	B	A	B	A	B	-	A	A	A	A	B	B	A
Ps130710	18.1	12	Ps001374	Ps000092	W19_900	Ps000092	0.122823	A	-	A	A	B	B	B	A	B	A	-	B	B	A	A	A	B	A	A	A	A	B	-	-	A	A	A	A	A	B	A	B	A	-	B	A	A	A	A	B	B	A
Ps134111	18.1	12	Ps001374	Ps000092	W19_900	Ps000092	0.122823	A	-	A	A	B	B	B	-	-	A	B	B	B	A	A	A	B	A	-	A	A	B	-	B	A	A	A	A	A	B	A	B	A	A	B	A	A	A	A	B	B	A
Ps106402	18.1	12.6	Ps001374	Ps000092	W19_900	Ps000092	0.296718	A	B	A	A	B	B	B	A	B	A	B	B	B	A	A	A	B	A	A	A	A	B	-	B	A	A	A	A	-	B	A	B	A	B	-	A	A	A	A	B	B	A
Ps123546	18.1	12.3	Ps001374	Ps000092	W19_900	Ps000092	0.647315	A	B	-	A	B	B	B	A	B	A	B	B	B	A	A	A	B	A	A	A	-	B	B	B	-	A	A	A	A	B	A	B	A	-	B	A	A	-	A	B	B	A
Ps131049	18.7	10	Ps001374	Ps000092	W19_900	Ps000092	0.757621	-	B	A	A	B	B	B	A	B	A	B	B	B	A	A	A	B	A	A	A	-	B	B	B	A	A	A	A	B	B	A	B	A	-	B	-	A	A	A	B	B	-
Ps118843	18.8	10	Ps001374	Ps000092	W19_900	Ps000092	0.445766	A	B	A	A	B	B	B	-	B	A	B	-	B	A	A	A	B	A	A	A	A	B	B	B	A	A	A	A	A	B	A	B	A	-	B	A	A	A	A	B	B	-
Ps101281	18.8	10.6	Ps001374	Ps000092	W19_900	Ps000092	0.376344	A	B	A	A	B	B	B	A	B	A	B	B	B	A	A	A	B	A	A	-	A	B	A	B	A	A	A	A	B	B	A	B	A	A	B	A	A	-	A	B	B	A
Ps134298	18.9	10.3	Ps001374	Ps000092	W19_900	Ps000092	0.217044	A	B	A	A	B	B	B	A	B	A	B	B	B	A	A	A	B	A	A	A	A	B	-	B	A	A	A	A	A	B	A	B	A	-	B	A	A	A	A	B	-	-
Ps120624	18.9	10.3	Ps001374	Ps000092	W19_900	Ps000092	0.169912	A	B	A	A	-	B	B	A	B	A	-	B	B	A	A	A	B	A	A	A	A	B	B	B	A	A	A	A	A	B	A	B	A	-	B	A	A	A	A	-	B	A
Ps143101	18.9	10	Ps001374	Ps000092	W19_900	Ps000092	0.159854	A	B	A	A	-	B	B	A	B	A	B	B	B	A	A	A	-	A	A	A	A	B	-	B	A	A	A	A	A	B	A	B	A	-	B	A	A	A	A	-	B	A
Ps138834	18.9	9.4	Ps001374	Ps000092	W19_900	Ps000092	0.43488	A	B	A	A	B	B	-	A	B	-	B	B	B	A	A	A	B	-	A	A	A	B	-	B	A	A	A	A	A	-	-	B	-	B	B	A	A	A	A	B	B	A
Ps136711	18.9	9.4	Ps001374	Ps000092	W19_900	Ps000092	0.274299	A	-	A	A	B	-	B	A	B	A	B	B	B	A	A	A	B	A	-	A	A	B	A	B	-	A	A	A	A	B	A	B	A	B	B	A	A	A	A	-	B	A
Ps111586	18.9	10.9	Ps001374	Ps000092	W19_900	Ps000092	0.131668	A	B	A	A	B	B	B	-	B	A	B	B	A	A	A	A	B	A	A	A	A	B	-	B	A	A	A	A	A	B	A	B	A	-	B	A	A	A	A	B	B	A
Ps111126	18.9	10.6	Ps001374	Ps000092	W19_900	Ps000092	0.365712	A	B	A	A	B	B	B	A	B	A	B	B	B	A	A	A	B	A	A	A	A	B	-	B	A	A	A	A	A	B	A	B	A	B	B	A	-	A	A	B	-	A
Ps115811	18.9	9.7	Ps001374	Ps000092	W19_900	Ps000092	0.647315	A	B	A	A	B	B	B	A	B	A	B	B	B	-	A	A	B	A	A	A	A	B	B	B	A	-	A	A	-	B	A	B	A	B	-	A	A	A	A	B	-	A
Ps156445	18.9	8.9	Ps001374	Ps000092	W19_900	Ps000092	0.42334	A	B	A	-	B	B	B	A	B	A	B	-	B	A	A	A	B	A	A	A	A	B	B	B	A	-	A	-	A	B	A	-	A	-	B	A	-	A	A	-	B	A
Ps137059	18.9	9.4	Ps001374	Ps000092	W19_900	Ps000092	0.43488	A	B	A	A	B	B	B	A	B	A	B	-	B	A	A	-	-	A	A	A	A	B	B	B	A	A	A	-	A	B	A	B	A	A	B	A	-	A	A	B	B	A
Ps104518	19	10.3	Ps001374	Ps000092	W19_900	Ps000092	0.456057	A	B	A	A	B	B	B	A	B	A	B	-	B	A	A	A	B	A	A	A	-	B	B	B	A	A	A	A	A	B	A	B	A	B	B	A	A	A	A	B	B	A
Ps122695	19	10.6	Ps001374	Ps000092	W19_900	Ps000092	0.445766	A	B	A	A	B	B	B	-	B	A	B	B	B	A	-	A	B	A	A	A	A	B	-	B	A	A	A	A	A	B	A	B	A	-	B	A	A	A	A	B	B	A
Ps147725	19	9.1	Ps001374	Ps000092	W19_900	Ps000092	0.205903	-	B	A	A	-	B	B	A	B	A	-	B	B	A	A	A	B	-	A	A	A	B	A	B	A	A	A	A	A	-	-	B	A	B	B	A	A	A	A	B	B	A
Ps122385	19	10.3	Ps001374	Ps000092	W19_900	Ps000092	0.445766	A	B	A	A	B	B	B	A	B	A	B	B	B	-	A	A	B	A	-	A	A	B	B	B	A	A	A	A	A	B	A	B	A	-	B	A	A	A	A	-	B	A
Ps146200	19	9.1	Ps001374	Ps000092	W19_900	Ps000092	0.342782	A	B	A	A	B	B	B	A	-	A	B	B	B	A	A	A	B	A	-	A	A	B	A	B	A	A	A	A	-	-	A	B	-	B	B	A	A	A	-	B	-	A
Ps160621	19	8.3	Ps001374	Ps000092	W19_900	Ps000092	0.0325828	A	B	A	A	B	B	B	A	B	A	-	-	B	A	A	A	B	A	A	A	A	-	-	-	A	A	A	A	-	-	A	B	A	A	B	-	A	A	-	B	-	A
Ps151489	19	9.7	Ps001374	Ps000092	W19_900	Ps000092	0.75183	A	B	A	A	B	B	B	A	B	-	B	B	B	-	A	A	B	A	A	A	A	B	-	B	A	-	A	A	A	B	A	B	A	-	B	-	A	A	A	B	B	A
Ps100967	19	10.9	Ps001374	Ps000092	W19_900	Ps000092	0.238185	A	B	A	A	B	B	B	A	B	A	B	B	B	A	A	A	-	A	A	A	A	B	A	B	A	A	A	A	A	B	A	B	A	-	B	A	A	A	A	B	B	A
Ps162505	19	8	Ps001374	Ps000092	W19_900	Ps000092	0.504985	-	-	A	-	B	B	B	A	B	-	-	B	B	A	A	A	B	A	A	A	A	-	B	B	A	-	-	A	A	B	A	B	A	B	B	-	A	A	A	B	B	A
Ps107702	19	10.3	Ps001374	Ps000092	W19_900	Ps000092	0.2278	A	B	-	A	B	B	B	A	-	A	B	B	B	A	A	A	B	A	A	A	A	B	A	B	-	A	A	A	A	B	A	B	A	A	B	A	A	A	A	B	B	A
Ps109332	19.1	10.3	Ps001374	Ps000092	W19_900	Ps000092	0.763025	A	B	A	A	B	B	B	A	B	A	B	B	B	A	A	A	B	-	A	A	A	B	-	B	A	A	A	A	A	B	A	B	A	B	B	-	A	-	A	B	B	A
Ps134353	19.1	10	Ps001374	Ps000092	W19_900	Ps000092	0.537094	A	-	A	A	B	B	B	A	B	A	B	B	B	A	A	A	B	A	A	A	A	B	-	B	A	A	A	A	-	B	A	B	A	-	B	-	A	A	-	B	B	A
Ps138839	19.1	9.1	Ps001374	Ps000092	W19_900	Ps000092	0.43488	A	B	A	A	B	B	B	A	B	A	B	-	B	A	-	A	B	A	A	A	A	B	A	B	A	-	A	A	A	B	A	B	A	B	B	-	A	A	A	B	B	A
Ps119839	19.1	10.3	Ps001374	Ps000092	W19_900	Ps000092	0.285751	A	B	A	A	B	B	B	A	B	A	B	B	B	A	-	A	B	A	A	A	-	B	-	B	A	A	A	A	A	-	A	B	A	-	B	A	A	A	A	B	B	A
Ps127241	19.1	10	Ps001374	Ps000092	W19_900	Ps000092	0.217044	A	B	A	A	B	B	B	A	B	A	-	-	B	A	A	A	B	A	A	-	A	-	-	B	A	A	A	A	A	B	A	B	A	B	B	A	A	A	A	B	B	A
Ps130598	19.2	10	Ps001374	Ps000092	W19_900	Ps000092	0.122823	A	B	A	A	B	B	B	A	B	A	B	B	-	A	A	A	-	A	A	A	A	B	-	B	A	A	A	A	A	B	A	B	A	A	B	A	A	A	-	B	B	A
Ps150632	19.2	9.4	Ps001374	Ps000092	W19_900	Ps000092	0.75183	A	B	-	A	B	B	B	A	B	A	-	B	B	A	A	A	B	A	-	A	A	B	-	B	A	A	A	A	-	B	A	B	A	A	B	-	-	A	-	B	B	A
Ps156530	19.2	8.6	Ps001374	Ps000092	W19_900	Ps000092	0.87278	A	B	A	A	B	B	B	A	B	A	B	B	B	A	A	A	B	A	A	A	-	B	B	B	-	-	A	-	-	B	-	B	A	A	B	A	-	-	A	B	B	A
Ps104623	19.3	10.3	Ps001374	Ps000092	W19_900	Ps000092	0.654721	A	B	A	A	B	B	B	A	B	A	B	B	B	A	-	A	B	A	A	A	A	B	A	B	A	A	A	A	-	B	A	B	A	B	B	A	A	-	A	B	B	A
Ps127361	19.3	9.4	Ps001374	Ps000092	W19_900	Ps000092	0.537094	A	B	A	A	B	B	B	-	B	A	B	B	B	A	-	A	-	A	A	A	-	B	B	B	A	A	A	A	A	B	-	B	A	A	B	A	A	A	A	B	B	A
Ps158708	19.6	8.9	Ps001374	Ps000092	W19_900	Ps000092	0.745603	A	B	A	-	B	B	B	A	B	A	B	B	B	A	-	A	B	A	A	A	A	B	-	B	A	A	-	A	A	B	-	-	A	B	B	-	A	A	-	B	B	A
Ps154523	32.3	7.5	Ps001374	Ps000092	Ps001374	O09_800	0.262332	A	B	B	B	B	A	B	A	B	A	A	B	A	B	-	B	B	A	A	A	B	-	A	B	-	-	-	A	-	B	B	B	A	B	B	-	-	-	B	B	B	A
Ps126029	32.3	8.9	Ps001374	Ps000092	Ps001374	O09_800	0.354539	A	B	B	B	B	B	B	A	B	A	A	B	A	B	B	B	B	A	A	-	B	-	B	B	A	A	A	A	A	B	B	B	-	-	B	A	A	B	-	B	B	A
Ps129568	32.3	8.6	Ps001374	Ps000092	Ps001374	O09_800	0.354539	A	B	B	B	B	B	B	A	B	-	-	B	A	B	B	-	-	A	A	A	B	A	B	B	A	A	A	A	A	B	B	B	A	B	B	A	A	B	B	B	-	-
Ps106606	32.5	9.2	Ps001374	Ps000092	Ps001374	O09_800	0.881497	A	B	B	B	B	A	B	A	-	A	A	B	A	B	B	B	B	A	A	A	B	A	-	B	A	A	A	A	A	B	B	B	A	B	B	A	A	-	B	B	B	A
Ps117499	32.7	8.9	Ps001374	Ps000092	Ps001374	O09_800	0.878794	A	B	B	B	B	A	B	A	B	A	A	B	A	B	B	B	B	A	-	A	B	A	-	B	A	A	A	A	A	B	-	B	A	B	B	A	A	B	B	B	-	A
Ps135367	32.7	8.3	Ps001374	Ps000092	Ps001374	O09_800	0.875896	A	B	B	B	B	A	B	A	-	A	-	B	-	B	B	B	B	A	A	A	B	A	A	B	A	A	A	A	A	B	B	B	-	B	-	-	A	B	B	B	-	A
Ps119271	32.8	10.6	Ps001374	Ps000092	Ps001374	O09_800	0.878794	A	B	B	B	B	B	B	A	B	A	-	B	A	B	-	B	B	A	A	A	B	A	A	B	A	A	A	A	A	B	-	B	A	-	B	A	A	-	B	B	B	A
Ps160331	32.8	9.4	Ps001374	Ps000092	Ps001374	O09_800	0.745603	-	B	B	-	B	-	B	-	B	A	-	B	A	B	B	B	B	A	A	A	-	A	A	B	A	A	A	A	A	B	B	B	A	-	B	-	A	B	-	B	B	A
Ps150787	32.8	9.7	Ps001374	Ps000092	Ps001374	O09_800	0.75183	A	B	B	B	B	B	-	A	B	A	-	B	A	B	B	-	B	A	A	A	B	A	A	B	-	A	A	A	A	B	-	B	-	-	B	A	A	-	B	B	B	A
Ps151517	32.8	10	Ps001374	Ps000092	Ps001374	O09_800	0.75183	A	B	B	-	B	B	B	A	B	A	-	B	A	B	B	B	B	A	A	-	B	-	A	B	A	A	A	A	A	B	B	-	A	-	B	A	A	B	-	B	B	A
Ps107215	32.8	9.2	Ps001374	Ps000092	Ps001374	O09_800	0.763025	A	B	B	B	B	B	B	A	B	A	A	B	A	B	B	B	-	A	A	A	B	A	A	B	A	A	A	A	B	B	B	B	A	-	-	A	A	B	B	B	-	A
Ps153061	32.8	9.1	Ps001374	Ps000092	Ps001374	O09_800	0.87278	A	-	B	B	B	-	B	A	B	-	A	B	A	B	B	-	B	A	A	A	B	A	A	B	A	A	A	A	A	B	-	B	A	B	B	A	A	-	-	B	B	A
Ps101246	32.8	9.4	Ps001374	Ps000092	Ps001374	O09_800	0.768083	A	B	B	B	B	A	B	A	B	A	A	B	A	B	B	B	B	-	A	A	B	A	A	B	A	A	A	A	A	B	B	B	A	A	B	A	A	B	-	B	B	A
Ps156095	32.8	8.9	Ps001374	Ps000092	Ps001374	O09_800	0.87278	A	B	B	B	B	-	B	A	B	A	A	B	A	B	B	B	B	A	A	A	-	A	-	B	A	A	A	A	A	B	-	B	A	B	B	-	A	-	-	B	B	-
Ps162690	32.9	8.3	Ps001374	Ps000092	Ps001374	O09_800	1	A	B	B	-	B	-	-	A	B	A	A	B	A	B	-	-	B	A	A	-	B	A	A	B	A	-	A	A	-	B	B	-	-	-	B	A	A	B	B	B	B	A
Ps163179	32.9	8.6	Ps001374	Ps000092	Ps001374	O09_800	0.738883	A	B	-	B	B	-	-	A	B	A	-	B	A	B	-	B	B	A	-	-	B	A	A	-	A	A	A	A	A	B	B	B	A	A	B	A	-	-	-	B	B	A
Ps147212	32.9	9.4	Ps001374	Ps000092	Ps001374	O09_800	1	A	B	B	B	B	B	-	A	B	A	A	B	A	B	B	-	B	A	A	A	B	A	A	B	A	A	A	A	-	B	B	B	A	-	B	A	A	B	-	B	-	A
Ps110077	32.9	10.3	Ps001374	Ps000092	Ps001374	O09_800	0.546494	A	B	B	B	B	B	B	A	B	A	A	B	A	B	B	-	B	A	A	A	B	-	A	B	A	A	A	A	-	B	-	B	A	B	B	A	A	B	B	B	B	A
Ps001162	33	21.5	Ps001374	Ps000092	Ps001374	O09_800	0.654721	A	B	B	B	B	B	B	A	B	A	-	B	A	B	B	B	B	A	A	A	B	A	A	B	A	A	A	A	A	B	B	B	A	-	B	A	A	B	B	B	B	A
Ps001351	33	21.5	Ps001374	Ps000092	Ps001374	O09_800	0.654721	A	B	B	B	B	B	B	A	B	A	-	B	A	B	B	B	B	A	A	A	B	A	A	B	A	A	A	A	A	B	B	B	A	-	B	A	A	B	B	B	B	A
Ps144049	33	10	Ps001374	Ps000092	Ps001374	O09_800	0.639412	A	B	B	B	B	B	B	A	B	A	-	B	A	B	B	B	-	A	A	A	B	A	A	B	A	A	-	A	-	B	B	B	A	B	B	A	A	-	-	B	B	A
Ps163217	33	8.3	Ps001374	Ps000092	Ps001374	O09_800	0.317311	A	B	B	B	B	-	B	A	B	-	A	B	-	B	B	B	B	A	A	A	B	A	-	B	A	A	A	-	-	B	-	-	A	-	B	-	-	B	-	B	B	A
Ps149711	33	9.7	Ps001374	Ps000092	Ps001374	O09_800	0.75183	A	B	B	B	B	B	B	A	B	A	-	B	A	B	-	B	B	A	A	A	B	A	A	B	A	A	A	-	A	-	-	B	A	-	-	A	A	B	B	B	B	A
Ps137940	33	10	Ps001374	Ps000092	Ps001374	O09_800	0.875896	A	B	B	B	-	-	B	A	B	A	-	B	A	-	B	B	B	A	A	A	B	A	A	B	A	-	A	A	A	B	B	B	A	B	B	A	A	-	B	B	B	A
Ps151757	33	9.7	Ps001374	Ps000092	Ps001374	O09_800	0.75183	A	-	B	-	B	-	-	A	B	A	-	B	A	B	B	B	B	A	A	A	-	A	A	B	A	A	A	A	A	-	B	B	A	B	B	A	A	B	B	B	B	A
Ps158465	33	9.1	Ps001374	Ps000092	Ps001374	O09_800	0.745603	A	B	B	B	B	-	B	A	B	-	-	-	A	B	-	-	B	A	A	-	B	A	A	B	A	A	A	A	A	B	B	B	A	-	B	A	A	B	B	B	-	A
Ps161430	33	8.6	Ps001374	Ps000092	Ps001374	O09_800	0.41108	A	B	-	B	B	B	B	A	-	A	-	B	A	B	B	B	B	A	A	A	B	A	-	B	-	-	A	A	A	B	B	B	A	B	B	A	A	B	-	-	B	A
Ps156756	33	9.1	Ps001374	Ps000092	Ps001374	O09_800	0.42334	A	B	B	B	B	-	B	A	B	A	-	B	A	B	-	-	B	A	A	-	B	A	A	B	A	A	-	A	-	B	B	B	-	B	B	A	A	B	B	B	B	A
Ps108188	33	10.3	Ps001374	Ps000092	Ps001374	O09_800	0.763025	A	B	B	B	B	B	B	A	B	A	A	B	A	B	B	B	-	A	-	A	B	A	A	B	A	A	A	A	A	B	-	B	A	B	B	A	A	B	-	B	B	A
Ps142134	33	9.7	Ps001374	Ps000092	Ps001374	O09_800	0.875896	A	B	-	B	B	B	B	A	B	A	A	-	A	-	B	-	B	A	A	A	B	A	-	B	A	A	A	A	A	B	B	B	A	-	B	A	A	B	B	B	B	A
Ps147689	33	10	Ps001374	Ps000092	Ps001374	O09_800	0.75183	A	B	B	B	B	B	B	A	B	A	-	B	A	B	B	B	B	A	A	A	B	A	A	B	A	A	A	-	A	-	B	B	A	-	B	-	A	-	B	B	B	A
Ps109849	33	10.3	Ps001374	Ps000092	Ps001374	O09_800	0.763025	A	B	B	B	B	B	B	A	B	A	A	B	A	B	B	B	B	A	A	A	B	A	A	B	-	A	A	A	-	B	-	B	A	A	B	A	A	B	-	B	B	A
Ps160655	33	8.6	Ps001374	Ps000092	Ps001374	O09_800	0.621873	A	-	B	B	-	-	-	A	B	A	A	B	-	-	B	B	-	A	A	A	B	A	A	B	A	A	A	A	A	B	B	B	A	-	-	-	A	B	-	B	B	A
Ps137058	33	9.7	Ps001374	Ps000092	Ps001374	O09_800	0.875896	A	B	B	B	-	B	B	A	B	A	B	B	A	B	-	B	B	A	A	A	B	A	A	B	A	A	A	A	-	B	B	-	A	-	B	A	A	B	-	B	B	A
Ps136809	33	9.7	Ps001374	Ps000092	Ps001374	O09_800	0.875896	A	B	B	B	-	B	B	A	-	A	A	B	-	B	B	-	B	-	A	A	-	A	A	B	A	A	A	A	A	B	B	B	A	A	B	A	A	B	B	B	B	A
Ps112357	33.1	10.6	Ps001374	Ps000092	Ps001374	O09_800	0.763025	-	B	B	-	B	B	B	A	-	A	-	B	A	B	B	B	B	A	A	A	B	A	A	B	A	A	A	A	A	B	B	B	A	A	B	A	A	B	B	B	B	A
Ps163214	33.1	8.9	Ps001374	Ps000092	Ps001374	O09_800	0.738883	A	B	B	B	B	-	B	A	B	A	-	B	A	B	B	-	B	-	A	A	B	A	A	B	A	A	A	A	-	-	B	B	A	-	-	A	A	B	-	B	B	-
Ps124618	33.1	10	Ps001374	Ps000092	Ps001374	O09_800	0.537094	A	B	B	B	B	B	B	A	B	A	-	B	A	-	B	B	B	-	A	A	B	A	A	B	-	A	A	A	A	-	B	B	A	B	B	A	A	B	B	B	-	A
Ps104144	33.1	10.9	Ps001374	Ps000092	Ps001374	O09_800	0.654721	A	B	B	B	B	B	B	A	B	A	A	B	A	B	B	-	B	A	A	A	B	A	-	B	A	A	A	A	A	B	B	B	A	-	B	A	A	B	B	B	B	A
Ps149094	33.1	9.4	Ps001374	Ps000092	Ps001374	O09_800	0.527089	-	B	B	B	B	-	B	A	B	-	A	B	A	B	B	B	B	A	A	A	B	-	A	B	A	A	A	A	A	-	B	B	-	B	B	A	A	B	-	B	B	A
Ps136116	33.1	10.3	Ps001374	Ps000092	Ps001374	O09_800	0.639412	A	B	B	B	B	B	B	A	B	A	-	B	A	B	B	B	B	A	A	-	B	A	A	B	A	A	A	A	A	B	B	B	A	-	-	A	A	B	-	B	B	A
Ps134450	33.1	9.7	Ps001374	Ps000092	Ps001374	O09_800	0.354539	-	B	B	-	-	B	B	A	B	A	B	B	A	B	B	B	B	A	A	A	B	A	-	B	A	A	A	A	A	B	B	B	-	B	B	A	A	B	B	-	B	A
Ps151730	33.1	9.4	Ps001374	Ps000092	Ps001374	O09_800	0.75183	A	B	B	B	-	B	-	A	B	A	-	-	A	B	B	B	B	A	A	A	B	A	A	-	A	-	A	A	A	B	B	B	A	B	B	-	A	-	B	B	B	A
Ps124128	33.1	10.6	Ps001374	Ps000092	Ps001374	O09_800	0.878794	A	B	B	B	-	-	B	A	B	A	B	B	A	B	B	B	B	A	A	A	-	A	A	B	A	A	A	A	A	B	B	B	A	-	B	A	A	B	B	B	B	A
Ps152638	33.1	9.1	Ps001374	Ps000092	Ps001374	O09_800	0.87278	A	B	B	B	B	B	B	A	B	-	A	-	A	B	B	B	B	A	A	-	B	A	-	B	A	-	A	A	A	B	-	B	A	A	B	A	A	B	-	B	B	A
Ps135040	33.1	10.6	Ps001374	Ps000092	Ps001374	O09_800	0.354539	A	B	B	B	B	B	B	A	B	A	-	B	A	B	B	B	B	A	-	A	B	-	A	B	A	-	A	A	A	B	B	B	A	-	B	A	A	B	B	B	B	A
Ps140871	33.1	10	Ps001374	Ps000092	Ps001374	O09_800	0.875896	A	B	B	B	B	B	B	A	B	A	A	B	A	B	B	B	B	A	A	A	B	A	A	-	A	A	A	-	A	B	-	B	A	-	B	A	A	-	B	B	-	A
Ps126071	33.1	10	Ps001374	Ps000092	Ps001374	O09_800	0.757621	A	B	B	B	B	B	B	A	B	A	-	B	A	-	B	B	B	A	A	A	B	A	A	B	A	A	A	A	A	B	B	B	A	B	B	A	-	-	B	-	B	-
Ps161869	33.1	8.9	Ps001374	Ps000092	Ps001374	O09_800	0.869417	A	B	B	-	B	-	B	A	B	A	-	-	A	B	B	B	B	A	-	A	B	A	-	B	A	A	A	A	A	B	-	B	A	B	-	A	A	B	B	B	-	-
Ps149011	33.1	10	Ps001374	Ps000092	Ps001374	O09_800	0.75183	A	B	-	B	B	B	B	A	B	A	-	B	A	B	B	B	B	A	A	A	-	A	A	B	-	A	A	A	A	B	B	B	A	-	-	A	A	B	B	B	B	A
Ps162953	33.1	8.9	Ps001374	Ps000092	Ps001374	O09_800	0.738883	A	B	B	-	-	-	B	A	-	A	-	B	A	B	B	B	B	A	A	A	B	A	-	B	A	A	A	A	-	-	-	-	A	-	B	A	A	B	B	B	B	A
Ps154218	33.1	9.1	Ps001374	Ps000092	Ps001374	O09_800	0.42334	A	B	B	-	B	-	B	A	B	-	A	B	-	B	B	B	B	A	A	A	B	A	-	B	A	A	-	A	A	B	B	B	A	-	B	A	A	B	B	B	-	A
Ps129467	33.1	10.3	Ps001374	Ps000092	Ps001374	O09_800	0.757621	A	B	B	-	-	B	B	-	B	A	-	B	A	B	B	B	B	A	A	A	B	A	A	B	A	A	A	A	-	B	B	B	A	A	B	A	A	B	B	B	B	A
Ps124604	33.1	10	Ps001374	Ps000092	Ps001374	O09_800	0.537094	A	B	B	-	B	-	B	A	B	-	-	B	A	B	B	B	B	A	A	A	B	A	A	B	A	A	A	A	-	-	B	B	A	B	B	A	A	B	B	B	B	A
Ps155097	33.1	9.4	Ps001374	Ps000092	Ps001374	O09_800	0.87278	A	B	B	B	B	B	B	A	B	A	A	B	A	B	-	-	B	A	A	A	B	A	A	B	-	A	A	-	A	B	B	-	-	-	B	A	A	B	B	B	-	A
Ps153119	33.1	9.4	Ps001374	Ps000092	Ps001374	O09_800	0.87278	A	-	B	-	B	-	B	A	B	A	A	-	A	B	B	B	B	A	A	A	B	A	A	B	A	A	A	A	A	B	B	B	A	-	B	-	-	B	B	B	B	A
Ps155434	33.1	9.4	Ps001374	Ps000092	Ps001374	O09_800	0.87278	A	B	B	B	B	B	B	-	-	A	A	-	A	B	B	B	B	A	-	A	-	A	A	B	A	A	A	A	A	B	B	B	A	-	B	A	A	B	-	B	B	-
Ps128387	33.1	10	Ps001374	Ps000092	Ps001374	O09_800	0.354539	A	B	B	B	B	B	B	A	B	A	B	-	A	B	B	B	B	A	A	A	B	-	A	B	A	-	-	A	A	B	B	B	A	-	B	A	A	B	B	-	B	A
Ps141571	33.1	10.3	Ps001374	Ps000092	Ps001374	O09_800	0.875896	A	B	-	B	B	-	B	A	B	A	-	B	A	B	B	B	B	A	A	A	B	A	A	B	A	A	A	A	A	B	B	B	A	-	B	A	A	B	-	B	-	A
Ps125163	33.1	10.3	Ps001374	Ps000092	Ps001374	O09_800	0.354539	A	B	B	B	B	B	B	A	B	A	-	B	A	B	B	-	B	A	-	A	B	A	A	B	A	A	A	A	A	B	B	B	A	-	B	A	-	B	B	B	B	A
Ps150860	33.1	9.7	Ps001374	Ps000092	Ps001374	O09_800	0.75183	A	B	B	B	B	A	B	A	B	A	A	B	-	B	B	-	B	A	A	A	-	A	A	B	A	-	A	A	A	B	B	B	A	-	B	-	A	B	B	B	B	A
Ps155375	33.1	9.1	Ps001374	Ps000092	Ps001374	O09_800	0.87278	A	B	-	B	B	-	B	A	B	A	-	-	A	-	B	B	B	A	A	A	B	A	A	B	A	A	-	-	-	B	B	B	A	A	B	A	A	B	B	B	-	A
Ps104037	33.1	11.2	Ps001374	Ps000092	Ps001374	O09_800	0.654721	A	B	B	-	B	B	B	A	B	A	-	B	A	B	B	B	B	A	A	A	B	A	A	B	A	A	A	A	A	B	B	B	A	B	B	A	A	B	B	B	B	A
Ps127679	33.1	10	Ps001374	Ps000092	Ps001374	O09_800	0.757621	A	B	B	B	B	B	B	A	B	A	A	B	A	B	B	B	B	A	A	A	B	A	-	B	-	A	A	-	A	B	-	B	A	A	B	A	A	B	-	B	B	A
Ps122738	33.1	10.3	Ps001374	Ps000092	Ps001374	O09_800	0.878794	-	B	B	B	B	-	B	A	B	A	A	B	A	-	B	B	B	A	A	A	B	A	A	B	A	A	A	A	A	B	B	B	A	B	B	A	A	B	-	B	B	A
Ps130787	33.1	10	Ps001374	Ps000092	Ps001374	O09_800	0.354539	A	B	-	B	B	B	B	A	B	A	B	B	-	B	B	B	B	A	A	-	B	A	A	B	A	A	A	A	A	B	B	-	A	B	B	A	-	B	B	B	B	A
Ps141621	33.1	10	Ps001374	Ps000092	Ps001374	O09_800	0.639412	A	B	B	B	B	-	B	A	B	A	-	B	A	B	B	B	B	A	A	-	B	A	A	B	A	A	A	A	-	-	-	B	A	-	B	A	A	B	B	B	B	A
Ps140040	33.1	9.7	Ps001374	Ps000092	Ps001374	O09_800	0.875896	A	B	B	-	B	-	B	A	B	A	A	B	A	B	B	B	B	-	A	A	B	A	A	-	A	A	A	A	A	B	-	B	A	-	B	A	A	B	B	B	B	A
Ps124976	33.1	10	Ps001374	Ps000092	Ps001374	O09_800	1	A	B	B	B	B	-	B	A	B	A	A	B	A	B	B	B	B	A	A	A	B	A	A	B	A	A	A	A	A	B	B	B	A	-	B	A	A	B	-	-	B	-
Ps141222	33.1	10	Ps001374	Ps000092	Ps001374	O09_800	0.875896	A	B	B	B	B	B	B	A	B	A	A	B	A	B	B	B	B	A	A	A	-	A	A	B	-	A	A	A	A	-	-	-	A	-	B	A	A	B	B	B	B	A
Ps110380	33.1	10.6	Ps001374	Ps000092	Ps001374	O09_800	0.546494	A	B	B	B	B	B	B	A	B	A	A	B	-	B	B	-	B	A	A	A	B	A	A	B	A	A	A	A	A	B	B	B	A	B	B	-	A	B	B	B	B	A
Ps121027	33.1	10.6	Ps001374	Ps000092	Ps001374	O09_800	0.878794	A	B	B	B	-	B	B	A	B	A	-	B	A	B	B	B	-	A	A	A	B	A	A	B	A	A	A	A	A	B	B	B	A	-	B	A	A	B	B	B	B	A
Ps160250	33.2	8.9	Ps001374	Ps000092	Ps001374	O09_800	0.745603	A	B	B	B	B	-	B	A	B	A	A	B	A	B	B	-	B	A	A	-	B	-	A	B	A	A	A	-	-	B	B	B	-	A	B	A	A	B	B	B	-	A
Ps158139	33.2	9.4	Ps001374	Ps000092	Ps001374	O09_800	0.516412	A	B	B	B	B	B	B	A	B	A	-	B	A	B	B	B	-	A	A	A	-	A	A	B	A	A	A	A	A	-	B	B	-	-	B	-	-	B	B	B	B	A
Ps118517	33.2	10.3	Ps001374	Ps000092	Ps001374	O09_800	0.647315	A	B	B	B	B	B	B	A	B	A	-	B	A	B	B	B	B	A	A	-	B	A	A	-	A	A	A	A	A	B	B	B	-	A	-	A	A	B	B	B	B	A
Ps104666	33.2	10.9	Ps001374	Ps000092	Ps001374	O09_800	0.456057	A	B	B	B	B	B	B	A	B	A	B	B	A	B	B	B	B	A	A	A	B	A	A	-	A	A	A	A	A	B	B	B	A	B	B	A	A	B	B	B	B	A
Ps107426	33.2	10.6	Ps001374	Ps000092	Ps001374	O09_800	0.763025	A	B	B	B	B	B	B	A	B	A	-	B	A	B	B	B	-	A	A	A	B	A	A	B	A	A	A	A	A	B	B	-	A	B	B	A	A	B	B	-	B	A
Ps145637	33.2	9.7	Ps001374	Ps000092	Ps001374	O09_800	1	A	B	B	B	B	-	-	A	B	A	B	B	A	-	B	B	B	A	A	A	B	A	A	B	-	A	A	A	A	-	B	B	A	-	-	A	A	B	B	B	B	A
Ps119108	33.2	10.3	Ps001374	Ps000092	Ps001374	O09_800	0.878794	A	B	B	B	B	B	B	A	B	A	A	B	A	B	B	B	B	A	-	A	-	A	A	B	A	A	A	A	A	-	B	B	A	-	B	A	A	B	B	B	-	A
Ps122468	33.2	10.9	Ps001374	Ps000092	Ps001374	O09_800	0.445766	A	B	B	B	B	B	B	A	B	A	-	B	A	B	B	B	B	A	A	-	B	A	-	B	A	A	A	A	A	B	B	B	A	-	B	A	A	B	B	B	B	A
Ps153392	33.2	9.1	Ps001374	Ps000092	Ps001374	O09_800	0.630954	A	B	B	B	B	B	B	A	-	-	-	-	A	B	-	B	-	A	A	A	B	A	A	B	-	A	A	A	A	B	B	B	A	B	B	-	A	B	B	-	B	A
Ps120304	33.2	10.3	Ps001374	Ps000092	Ps001374	O09_800	0.878794	A	B	B	B	B	-	-	A	B	A	A	B	A	B	B	B	B	A	A	A	B	A	A	B	A	A	A	A	A	B	B	B	A	B	B	A	A	B	-	B	B	A
Ps138489	33.2	10	Ps001374	Ps000092	Ps001374	O09_800	0.875896	A	B	B	B	B	B	B	A	-	A	A	B	A	-	B	B	-	A	A	A	B	A	-	B	A	A	A	A	A	-	B	B	A	-	B	A	A	B	B	B	B	A
Ps120454	33.2	10.9	Ps001374	Ps000092	Ps001374	O09_800	0.647315	A	B	B	B	B	B	B	-	B	A	-	B	A	B	B	B	B	A	A	A	B	A	A	B	A	A	A	A	A	B	B	B	A	-	B	A	A	B	B	-	B	A
Ps151126	33.2	9.7	Ps001374	Ps000092	Ps001374	O09_800	0.75183	A	B	B	-	-	-	B	A	B	A	A	B	A	B	B	B	B	A	A	A	-	A	A	B	A	-	A	A	A	B	B	B	A	-	B	A	A	B	B	B	B	A
Ps125866	33.2	10.3	Ps001374	Ps000092	Ps001374	O09_800	0.354539	-	B	B	B	B	-	B	A	B	-	-	B	A	B	B	B	B	A	A	A	B	A	A	B	A	A	A	A	-	B	B	B	A	-	B	A	A	B	B	B	B	A
Ps117201	33.2	10.6	Ps001374	Ps000092	Ps001374	O09_800	0.647315	A	B	B	B	B	B	B	A	B	A	A	B	-	B	B	B	B	A	A	A	B	A	A	B	A	A	A	A	A	B	B	B	A	-	B	-	A	B	B	B	-	A
Ps151377	33.2	9.7	Ps001374	Ps000092	Ps001374	O09_800	0.75183	A	B	B	B	B	-	B	A	B	A	A	B	-	B	B	B	B	A	A	A	B	A	A	B	A	-	A	A	A	-	-	B	A	-	B	A	-	B	B	B	B	A
Ps113667	33.2	11.2	Ps001374	Ps000092	Ps001374	O09_800	0.763025	A	B	B	B	B	-	B	A	B	A	-	B	A	B	B	B	B	A	A	A	B	A	A	B	A	A	A	A	A	B	B	B	A	-	B	A	A	B	B	B	B	A
Ps118697	33.2	10.3	Ps001374	Ps000092	Ps001374	O09_800	0.878794	A	B	B	B	B	-	B	A	B	A	A	B	A	B	B	B	B	A	A	A	B	A	A	B	A	A	A	A	-	B	B	B	A	-	B	A	A	B	-	B	-	A
Ps150065	33.2	10	Ps001374	Ps000092	Ps001374	O09_800	0.75183	A	B	-	B	B	B	B	A	-	A	-	B	A	B	B	B	B	A	A	A	B	A	-	-	A	A	A	A	-	B	B	B	A	-	B	A	A	B	B	B	B	A
Ps103420	33.2	10.9	Ps001374	Ps000092	Ps001374	O09_800	0.881497	A	B	B	-	B	-	B	A	B	A	A	B	A	B	B	B	B	A	A	A	B	A	A	B	A	A	A	A	A	B	B	B	A	B	B	A	A	B	B	B	B	A
Ps111031	33.2	11.2	Ps001374	Ps000092	Ps001374	O09_800	0.546494	A	B	B	B	B	B	B	A	B	A	-	B	A	B	B	B	B	A	A	A	B	A	A	B	A	A	A	A	A	B	B	B	A	-	B	-	A	B	B	B	B	A
Ps130676	33.2	10	Ps001374	Ps000092	Ps001374	O09_800	0.757621	A	B	B	B	-	B	B	A	B	A	A	B	A	B	B	B	B	A	A	A	B	A	A	B	A	A	A	A	A	B	B	B	A	-	B	A	-	-	B	B	-	A
Ps121723	33.2	10.3	Ps001374	Ps000092	Ps001374	O09_800	0.647315	A	B	B	B	B	B	B	A	-	A	A	B	A	B	B	B	B	-	A	A	B	A	A	B	A	A	A	A	-	B	B	B	A	B	B	A	A	-	B	B	B	A
Ps104741	33.2	10.9	Ps001374	Ps000092	Ps001374	O09_800	0.881497	A	B	B	B	B	B	B	A	B	A	A	B	A	B	B	B	B	A	A	A	B	A	A	B	A	A	A	A	A	B	B	B	A	B	B	A	A	B	-	-	B	A
Ps118078	33.2	10.9	Ps001374	Ps000092	Ps001374	O09_800	0.647315	A	B	B	B	B	B	B	A	B	A	-	-	A	B	B	B	B	A	A	A	B	A	A	B	A	A	A	A	A	B	B	B	A	-	B	-	A	B	B	B	B	A
Ps159315	33.2	8.9	Ps001374	Ps000092	Ps001374	O09_800	0.516412	A	B	B	B	B	B	B	A	B	A	A	B	A	B	B	B	B	A	A	-	B	A	A	B	-	-	A	-	A	B	-	B	A	A	B	A	A	B	-	B	B	A
Ps149413	33.2	9.4	Ps001374	Ps000092	Ps001374	O09_800	0.75183	A	B	-	B	B	B	B	A	-	-	A	B	A	B	B	-	B	A	A	A	B	A	A	B	-	A	A	A	A	B	B	-	-	-	B	A	A	B	B	B	B	A
Ps156630	33.2	9.1	Ps001374	Ps000092	Ps001374	O09_800	0.87278	A	B	B	B	B	-	B	A	-	A	A	B	A	B	B	B	B	A	A	-	B	-	A	-	A	-	A	A	A	B	-	B	A	B	B	A	A	B	B	B	B	A
Ps112745	33.2	10.9	Ps001374	Ps000092	Ps001374	O09_800	0.763025	A	B	B	B	B	B	B	A	B	A	A	B	A	B	B	B	B	A	A	A	-	A	A	B	A	A	A	-	A	B	B	B	A	-	B	A	A	B	B	B	B	A
Ps113132	33.2	10.3	Ps001374	Ps000092	Ps001374	O09_800	1	A	B	B	B	B	B	B	A	-	A	A	B	A	B	B	B	B	A	A	A	-	A	A	B	A	A	-	A	A	B	B	B	A	A	B	A	A	B	B	-	B	A
Ps150855	33.2	9.7	Ps001374	Ps000092	Ps001374	O09_800	0.75183	A	B	B	B	B	B	B	A	B	A	A	B	A	-	B	-	B	A	A	A	B	A	A	B	A	-	A	A	A	B	B	B	A	-	B	-	A	B	B	B	B	-
Ps148636	33.2	9.7	Ps001374	Ps000092	Ps001374	O09_800	0.75183	A	B	B	B	-	B	B	A	B	-	-	B	A	-	B	B	B	A	A	A	B	A	A	B	A	A	A	A	A	-	B	B	A	B	B	A	-	B	B	B	B	A
Ps120427	33.2	10.6	Ps001374	Ps000092	Ps001374	O09_800	0.647315	A	B	B	B	B	B	B	A	B	A	-	B	A	B	B	B	B	A	A	A	B	A	A	B	A	A	A	A	A	B	B	B	-	-	B	A	A	B	B	-	-	A
Ps125391	33.3	10	Ps001374	Ps000092	Ps001374	O09_800	0.537094	A	B	-	B	B	A	B	A	B	A	-	B	A	B	B	B	B	A	A	A	B	A	-	B	A	A	A	A	-	B	B	B	A	B	-	A	A	B	B	B	B	A
Ps145449	33.3	9.7	Ps001374	Ps000092	Ps001374	O09_800	1	A	B	B	B	-	-	-	A	B	-	A	B	A	B	B	B	B	A	A	A	B	A	A	B	A	A	A	A	A	B	-	B	A	-	B	-	A	B	B	B	B	A
Ps158908	33.3	9.1	Ps001374	Ps000092	Ps001374	O09_800	0.745603	A	B	B	B	B	-	B	A	B	A	A	B	A	B	B	-	-	A	A	-	B	A	A	B	A	A	A	-	A	B	B	B	A	-	B	-	A	B	B	B	-	A
Ps136136	33.3	9.7	Ps001374	Ps000092	Ps001374	O09_800	0.875896	A	B	B	B	B	B	B	A	B	A	A	-	A	B	B	B	B	A	A	-	B	A	A	B	A	A	A	A	A	B	B	B	A	B	-	A	A	-	B	B	-	-
Ps104707	33.3	10.9	Ps001374	Ps000092	Ps001374	O09_800	0.881497	A	B	B	B	B	B	B	A	B	A	A	B	A	B	B	B	B	A	A	A	B	A	A	B	A	A	A	A	A	B	B	-	A	A	B	A	-	B	B	B	B	A
Ps135593	33.3	9.7	Ps001374	Ps000092	Ps001374	O09_800	0.875896	A	B	B	-	B	B	B	A	B	A	A	B	A	B	B	B	B	A	A	A	B	A	A	B	-	A	A	A	A	-	B	B	A	B	B	A	-	B	B	-	B	A
Ps143998	33.3	10	Ps001374	Ps000092	Ps001374	O09_800	0.875896	A	B	B	B	B	-	B	A	B	A	A	B	A	B	B	B	B	A	A	-	-	A	A	B	A	A	A	A	A	B	B	B	A	-	B	A	A	B	B	B	-	A
Ps142627	33.3	9.7	Ps001374	Ps000092	Ps001374	O09_800	0.875896	A	-	B	B	B	-	B	-	B	A	A	B	-	B	B	B	B	A	A	A	B	A	A	B	A	A	A	A	A	B	B	B	A	B	B	A	A	B	B	-	B	A
Ps141730	33.3	10	Ps001374	Ps000092	Ps001374	O09_800	0.43488	A	B	B	B	B	B	B	A	B	A	A	B	-	B	B	B	B	A	A	-	B	A	A	B	A	-	A	A	A	B	B	B	A	-	B	A	-	B	B	-	B	A
Ps139236	33.3	9.7	Ps001374	Ps000092	Ps001374	O09_800	0.639412	-	B	-	B	B	A	B	A	B	A	A	B	A	B	B	B	B	A	A	A	B	-	A	-	A	A	A	A	A	B	B	-	A	-	B	A	-	B	B	B	B	A
Ps145228	33.3	9.4	Ps001374	Ps000092	Ps001374	O09_800	1	A	B	B	B	-	B	B	A	-	A	A	B	A	B	B	-	-	A	A	A	B	A	A	B	-	A	A	A	A	-	B	B	A	B	B	A	A	B	B	B	B	A
Ps141167	33.3	10	Ps001374	Ps000092	Ps001374	O09_800	0.875896	A	B	B	B	B	-	B	A	B	A	-	B	A	B	B	B	B	A	A	-	B	A	A	-	A	A	A	A	-	B	B	B	A	A	B	A	A	B	B	B	-	A
Ps139289	33.3	9.7	Ps001374	Ps000092	Ps001374	O09_800	0.875896	A	B	B	B	B	B	B	A	B	A	A	B	A	B	B	B	B	A	A	A	B	A	A	B	A	-	A	A	A	B	-	-	A	-	-	A	A	B	B	B	-	A
Ps124849	33.3	10	Ps001374	Ps000092	Ps001374	O09_800	0.537094	A	B	B	-	B	B	B	A	B	A	A	B	A	B	B	B	B	A	A	A	B	A	A	B	A	A	A	A	A	-	B	B	-	B	B	A	-	B	B	B	B	A
Ps115178	33.3	10.6	Ps001374	Ps000092	Ps001374	O09_800	0.647315	A	B	B	B	B	B	B	A	B	A	-	B	A	B	B	B	B	A	A	-	B	A	A	B	A	A	A	A	A	B	B	B	A	A	-	-	A	B	B	B	B	A
Ps132222	33.3	9.7	Ps001374	Ps000092	Ps001374	O09_800	0.757621	A	B	B	B	-	-	B	A	-	A	A	B	A	B	B	B	B	A	A	A	-	A	A	B	A	A	A	A	A	B	B	-	A	A	B	A	-	B	B	B	B	A
Ps129114	33.3	10	Ps001374	Ps000092	Ps001374	O09_800	0.757621	A	B	B	B	B	B	B	-	B	A	A	B	A	B	B	B	B	-	A	-	B	A	A	B	A	A	A	A	A	B	-	B	A	A	B	A	A	B	B	-	B	A
Ps147019	33.3	9.4	Ps001374	Ps000092	Ps001374	O09_800	0.527089	A	B	B	B	B	B	B	A	B	A	A	B	A	B	B	B	B	A	A	-	-	A	A	B	A	-	A	A	-	B	B	B	A	B	B	A	A	B	B	B	-	-
Ps131427	33.3	10	Ps001374	Ps000092	Ps001374	O09_800	0.757621	A	B	B	B	B	B	B	A	B	A	A	B	A	B	B	B	-	A	A	A	B	A	A	B	A	A	A	A	A	B	-	-	A	B	B	A	A	B	B	-	B	A
Ps130852	33.3	10	Ps001374	Ps000092	Ps001374	O09_800	0.537094	A	B	B	B	-	B	B	A	B	A	A	B	-	B	B	B	B	A	A	A	B	A	A	B	A	A	-	A	A	B	B	B	A	A	B	-	-	B	B	B	B	A
Ps137277	33.3	10	Ps001374	Ps000092	Ps001374	O09_800	0.875896	A	B	B	B	B	-	B	A	B	A	A	B	A	B	B	B	B	-	A	-	B	A	A	B	A	A	A	A	A	B	-	B	A	-	B	A	A	B	B	B	B	A
Ps151292	33.3	9.7	Ps001374	Ps000092	Ps001374	O09_800	0.527089	A	B	-	B	B	B	B	A	-	A	-	B	A	B	B	B	B	-	A	A	B	A	A	B	A	A	A	A	B	B	B	B	A	A	-	A	A	B	B	B	B	A
Ps106865	33.3	10.3	Ps001374	Ps000092	Ps001374	O09_800	0.365712	-	B	B	B	B	B	B	A	B	A	A	B	A	B	B	B	B	A	A	A	B	A	A	B	A	A	A	-	A	B	B	B	A	B	-	-	A	B	B	B	B	A
Ps141320	33.3	9.7	Ps001374	Ps000092	Ps001374	O09_800	0.875896	A	B	-	B	B	-	B	A	B	A	A	B	A	B	B	B	B	A	A	A	-	A	A	B	A	A	A	A	A	B	B	B	A	B	-	A	A	B	B	B	B	-
Ps150086	33.3	9.1	Ps001374	Ps000092	Ps001374	O09_800	0.342782	A	B	-	B	B	B	B	A	B	A	A	B	A	B	B	B	B	A	-	A	B	A	A	B	-	-	A	A	A	B	B	B	A	A	B	-	-	B	B	-	B	A
Ps127806	33.3	10.3	Ps001374	Ps000092	Ps001374	O09_800	1	A	B	B	B	B	-	-	A	B	A	A	B	A	B	B	B	B	A	A	A	B	A	A	B	A	A	A	A	A	B	B	B	A	-	B	A	A	B	B	-	B	A
Ps118442	33.3	10.3	Ps001374	Ps000092	Ps001374	O09_800	0.647315	A	B	B	B	B	B	B	A	B	-	A	B	A	B	B	B	B	A	A	A	B	A	A	B	A	A	A	A	A	-	B	-	A	B	B	A	A	B	B	B	B	A
Ps142560	33.3	10.3	Ps001374	Ps000092	Ps001374	O09_800	0.639412	A	B	B	B	B	A	B	A	B	A	-	-	A	B	-	B	B	-	A	-	B	A	A	B	A	A	A	A	A	B	B	B	A	-	B	A	A	B	B	B	B	A
Ps132329	33.3	10.6	Ps001374	Ps000092	Ps001374	O09_800	0.757621	A	B	B	B	B	B	B	A	-	-	-	B	A	B	B	B	B	A	A	A	B	A	A	B	A	A	A	A	A	B	B	B	A	-	-	A	A	B	B	B	B	A
Ps139997	33.3	9.7	Ps001374	Ps000092	Ps001374	O09_800	0.875896	A	B	B	B	B	B	-	A	B	-	A	B	A	B	B	B	B	A	A	A	B	A	A	B	A	A	A	A	A	B	B	-	A	B	-	A	A	B	-	B	B	A
Ps113125	33.3	10.9	Ps001374	Ps000092	Ps001374	O09_800	1	A	B	B	B	B	-	B	A	B	A	A	B	A	B	B	B	B	A	A	A	B	A	A	B	A	A	A	A	A	B	B	B	A	-	B	A	A	B	B	B	-	A
Ps155881	33.3	9.4	Ps001374	Ps000092	Ps001374	O09_800	0.87278	A	B	-	B	B	B	B	A	B	A	A	-	A	B	B	B	B	A	A	A	B	A	A	B	A	-	A	A	-	B	B	B	A	-	B	-	A	B	B	B	-	A
Ps127846	33.4	9.7	Ps001374	Ps000092	Ps001374	O09_800	0.537094	A	B	B	B	B	B	B	A	B	A	A	B	A	B	B	B	B	A	A	-	B	A	A	B	A	A	A	A	-	B	B	-	-	A	B	A	-	B	B	-	B	A
Ps155382	33.4	9.4	Ps001374	Ps000092	Ps001374	O09_800	0.42334	-	B	B	B	B	-	B	-	B	A	A	B	A	B	B	B	B	A	A	A	B	A	A	B	A	A	-	A	A	B	B	B	A	-	B	-	-	B	B	B	-	A
Ps162245	33.4	8.6	Ps001374	Ps000092	Ps001374	O09_800	0.869417	-	B	B	B	-	B	B	A	B	-	A	B	A	B	B	B	B	A	A	A	-	A	A	B	-	A	A	A	A	B	B	B	A	-	B	A	-	B	B	-	-	A
Ps152798	33.4	9.1	Ps001374	Ps000092	Ps001374	O09_800	0.87278	A	B	B	B	B	A	B	A	-	A	A	-	A	B	B	B	-	A	A	A	B	A	A	B	A	A	-	A	A	B	B	B	A	B	B	A	-	B	B	B	-	A
Ps128780	33.4	10	Ps001374	Ps000092	Ps001374	O09_800	0.757621	A	B	B	B	B	B	B	A	B	A	A	-	A	B	B	B	B	A	A	A	B	A	-	B	A	A	A	A	A	B	B	B	A	-	B	-	A	B	B	B	-	-
Ps163347	33.4	8.3	Ps001374	Ps000092	Ps001374	O09_800	0.504985	A	B	B	B	B	B	-	A	B	A	A	B	A	B	B	B	-	-	-	-	-	A	A	B	A	-	A	-	A	B	B	-	A	B	-	-	A	B	B	B	B	A
Ps142277	33.4	9.7	Ps001374	Ps000092	Ps001374	O09_800	0.639412	A	-	B	B	B	B	B	A	B	A	A	-	A	B	B	B	B	-	A	A	B	A	A	B	A	A	A	A	A	-	B	B	A	-	B	-	A	B	B	B	B	A
Ps139669	33.4	9.7	Ps001374	Ps000092	Ps001374	O09_800	0.639412	A	B	B	B	-	-	B	A	B	A	A	B	A	B	B	B	B	A	A	A	B	A	-	B	-	A	A	A	A	B	B	B	A	B	-	A	A	B	B	B	B	A
Ps125382	33.4	9.7	Ps001374	Ps000092	Ps001374	O09_800	1	A	-	B	B	B	-	B	A	B	A	A	B	A	B	B	B	B	A	A	A	B	A	A	B	-	A	A	A	A	B	B	-	A	B	-	A	A	B	B	-	B	A
Ps144607	33.4	10	Ps001374	Ps000092	Ps001374	O09_800	0.639412	A	B	B	B	B	B	B	A	B	A	A	-	A	B	B	B	-	A	A	A	B	A	A	B	A	A	A	A	-	B	B	B	A	-	B	-	A	B	B	B	B	-
Ps111191	33.4	10.3	Ps001374	Ps000092	Ps001374	O09_800	0.365712	A	B	B	B	B	B	B	A	B	A	A	B	A	B	B	B	B	A	A	A	B	A	B	B	-	-	A	A	A	B	B	B	A	A	B	A	A	B	B	-	B	A
Ps001305	33.5	23.8	Ps001374	Ps000092	Ps001374	O09_800	0.456057	A	B	B	B	B	B	B	A	B	A	-	B	A	B	B	B	B	A	A	A	B	A	A	B	A	A	A	A	A	B	B	B	A	-	B	A	A	B	B	B	B	A
Ps001167	33.5	23.8	Ps001374	Ps000092	Ps001374	O09_800	0.456057	A	B	B	B	B	B	B	A	B	A	-	B	A	B	B	B	B	A	A	A	B	A	A	B	A	A	A	A	A	B	B	B	A	-	B	A	A	B	B	B	B	A
Ps160794	33.5	8.9	Ps001374	Ps000092	Ps001374	O09_800	0.621873	A	-	B	B	-	A	B	A	B	A	A	-	A	B	B	B	B	A	A	A	B	A	A	-	-	A	A	A	A	B	B	B	A	-	-	A	A	B	B	B	-	A
Ps158522	33.5	8.9	Ps001374	Ps000092	Ps001374	O09_800	0.745603	A	-	B	B	-	-	B	-	B	A	A	B	A	B	B	B	-	A	-	-	B	A	A	B	A	A	A	A	A	-	B	B	A	A	B	A	A	B	B	B	-	A
Ps000092	34						0.456057	A	B	B	B	B	B	B	A	B	A	-	B	A	B	B	B	B	A	A	A	B	A	A	B	A	A	A	A	A	B	B	B	A	-	B	A	A	B	B	B	B	A
Ps001378	34	26.2	Ps001374	Ps000092	Ps001374	O09_800	0.456057	A	B	B	B	B	B	B	A	B	A	-	B	A	B	B	B	B	A	A	A	B	A	A	B	A	A	A	A	A	B	B	B	A	-	B	A	A	B	B	B	B	A
Ps141272	34	12	Ps001374	Ps000092	Ps001374	O09_800	0.639412	A	B	B	B	B	-	B	A	B	A	A	B	-	B	-	B	B	A	A	A	B	A	A	B	A	A	-	A	A	B	B	B	A	-	B	A	A	B	B	B	-	A
Ps157219	34	10.5	Ps001374	Ps000092	Ps001374	O09_800	0.745603	A	B	B	B	-	-	B	A	B	A	A	B	A	-	B	B	B	A	A	A	B	A	A	B	A	A	A	-	-	-	B	B	A	A	B	-	A	-	-	B	B	A
Ps159160	34	11.4	Ps000092	O09_800	Ps001374	O09_800	0.516412	A	B	B	B	B	B	-	A	B	A	-	-	A	B	B	B	B	-	A	A	B	A	A	B	A	-	A	A	A	-	B	B	A	-	B	A	A	B	-	B	B	A
Ps139030	34	11.7	Ps001374	Ps000092	Ps001374	O09_800	0.639412	A	B	B	B	B	-	B	A	B	A	-	B	-	B	B	B	B	A	A	A	B	A	A	B	A	A	A	A	A	-	B	B	-	A	B	-	A	B	B	B	B	A
Ps133269	34	12.6	Ps001374	Ps000092	Ps001374	O09_800	0.354539	A	B	B	B	B	B	B	A	B	A	-	B	A	B	B	B	-	A	A	A	B	-	A	B	A	A	A	A	A	B	B	B	A	-	B	-	A	B	B	B	B	A
Ps162150	34	10.5	Ps001374	Ps000092	Ps001374	O09_800	0.869417	A	B	B	-	-	-	B	A	B	A	A	B	A	B	-	B	B	A	-	-	B	A	A	-	A	A	-	A	A	B	B	B	A	A	B	A	A	B	B	B	-	A
Ps103478	34	12.9	Ps001374	Ps000092	Ps001374	O09_800	0.654721	A	B	B	B	B	B	B	A	B	A	A	B	A	B	-	B	B	A	A	A	B	A	A	B	A	A	A	A	A	B	B	B	A	-	B	A	A	B	B	B	B	A
Ps158704	34	11.1	Ps001374	Ps000092	Ps001374	O09_800	0.516412	A	B	-	B	B	-	B	A	B	A	-	B	A	B	B	B	B	A	A	A	-	A	A	B	A	A	A	A	A	B	B	B	-	B	-	-	-	B	B	B	B	A
Ps110211	34	12.3	Ps001374	Ps000092	Ps001374	O09_800	0.546494	-	B	B	B	B	B	-	A	B	A	A	B	A	B	B	B	B	A	A	A	B	A	A	B	A	A	A	A	A	B	B	B	A	A	B	-	A	B	B	-	B	A
Ps123625	34	12.6	Ps001374	Ps000092	Ps001374	O09_800	0.169912	A	B	B	B	B	B	B	A	B	A	-	B	A	B	B	B	B	A	A	A	B	A	-	B	A	A	A	-	A	B	B	B	A	-	B	A	-	B	B	B	B	A
Ps107497	34	12.6	Ps001374	Ps000092	Ps001374	O09_800	0.763025	A	B	B	B	B	B	B	A	B	A	A	B	A	B	B	B	B	A	A	A	B	A	A	-	A	A	A	A	A	B	B	B	A	A	B	A	-	B	-	B	B	A
Ps162091	34	10.5	Ps001374	Ps000092	Ps001374	O09_800	0.41108	A	B	B	-	B	B	B	A	B	A	A	B	A	B	B	B	B	A	-	A	B	A	A	B	A	A	A	A	-	B	-	B	A	-	B	-	-	B	B	-	-	A
Ps135599	34	11.7	Ps001374	Ps000092	Ps001374	O09_800	0.43488	A	B	B	B	B	B	B	A	B	A	B	B	A	B	B	-	B	A	A	A	B	A	A	B	A	A	A	-	-	B	B	B	A	A	-	A	A	B	B	B	B	A
Ps120436	34	12.3	Ps001374	Ps000092	Ps001374	O09_800	0.445766	A	B	B	B	B	B	B	A	B	-	A	B	A	B	B	B	B	A	A	A	B	A	A	B	-	A	A	A	A	B	B	B	A	-	B	A	A	B	B	-	B	A
Ps115306	34	12.3	Ps001374	Ps000092	Ps001374	O09_800	0.285751	A	B	B	B	B	B	B	A	B	A	A	B	A	B	B	B	B	A	A	-	B	A	A	B	A	A	A	A	A	B	B	B	-	-	B	A	A	B	B	B	B	A
Ps161959	34	10.8	Ps001374	Ps000092	Ps001374	O09_800	0.249817	A	-	B	-	B	-	B	-	B	A	B	B	-	B	B	B	B	A	A	-	B	A	A	B	A	A	A	A	A	B	B	B	A	-	B	A	-	B	-	B	B	-
Ps161715	34	10.8	Ps001374	Ps000092	Ps001374	O09_800	0.621873	A	B	B	B	-	-	-	A	B	A	A	-	A	B	B	B	B	A	A	A	B	A	A	-	A	A	A	A	-	B	B	-	A	-	B	A	A	-	B	-	B	A
Ps130224	34	12	Ps001374	Ps000092	Ps001374	O09_800	1	A	B	B	B	B	B	B	A	B	A	A	B	A	-	B	B	-	A	A	A	B	A	A	B	A	A	A	A	A	B	-	B	-	-	B	A	A	B	B	B	-	A
Ps126445	34	12.3	Ps001374	Ps000092	Ps001374	O09_800	0.757621	A	B	B	B	B	-	B	A	B	A	A	B	-	B	B	B	B	A	A	A	B	A	A	B	A	A	A	A	A	B	B	B	A	-	B	A	A	-	-	B	B	A
Ps133399	34	12.3	Ps001374	Ps000092	Ps001374	O09_800	0.757621	A	B	B	B	B	-	B	A	B	A	-	B	A	B	B	B	B	A	A	A	-	A	A	-	A	A	A	A	A	B	B	B	A	A	B	A	A	B	B	B	B	A
Ps134248	34	12	Ps001374	Ps000092	Ps001374	O09_800	0.757621	A	-	B	B	B	-	B	A	B	A	A	B	A	B	B	B	B	A	A	A	B	A	A	B	A	A	A	A	A	B	-	B	A	B	B	A	A	B	B	B	B	A
Ps123196	34	12.3	Ps001374	Ps000092	Ps001374	O09_800	0.647315	A	B	B	-	B	-	B	A	B	A	A	B	A	B	B	B	B	A	A	A	B	A	A	B	A	A	A	A	-	B	B	-	A	B	B	A	A	B	B	B	B	A
Ps131319	34	12.3	Ps000092	O09_800	Ps001374	O09_800	0.537094	A	B	B	B	B	B	B	A	B	A	-	-	A	B	B	B	B	A	A	A	B	A	-	B	A	A	A	A	-	B	B	B	A	A	B	A	A	B	B	B	B	A
Ps160941	34	10.5	Ps000092	O09_800	Ps001374	Ps001408	0.621873	A	B	B	B	B	B	-	A	B	A	A	-	A	B	B	B	B	A	A	A	B	A	A	-	-	A	A	A	-	B	B	B	A	A	-	-	A	-	B	B	B	-
Ps146583	34	11.7	Ps001374	Ps000092	Ps001374	O09_800	0.342782	A	B	B	B	B	B	B	A	B	A	-	B	A	B	B	B	B	A	A	A	B	A	-	B	A	A	A	-	-	B	B	B	A	-	B	A	A	B	-	-	-	A
Ps133166	34	12.3	Ps001374	Ps000092	Ps001374	O09_800	0.537094	A	B	B	B	B	-	B	A	B	A	A	B	A	B	B	B	B	A	A	-	B	A	-	B	A	A	A	A	A	B	B	-	A	-	B	A	A	B	B	B	B	A
Ps155229	34	11.4	Ps001374	Ps000092	Ps001374	O09_800	0.42334	A	B	B	B	B	B	B	A	B	A	A	B	A	B	B	B	B	A	-	A	B	A	A	B	A	-	A	A	A	-	B	B	A	-	B	A	A	B	B	-	-	A
Ps106266	34	13.2	Ps001374	Ps000092	Ps001374	O09_800	0.456057	A	B	B	B	B	B	B	A	B	A	A	B	A	B	B	B	B	A	A	A	B	A	A	B	A	A	A	A	-	B	B	B	A	-	B	A	A	B	B	B	B	A
Ps137843	34	11.7	Ps001374	Ps000092	Ps001374	O09_800	0.639412	A	B	B	B	B	B	B	A	B	-	A	-	A	B	-	B	B	A	A	A	B	A	A	B	A	A	A	A	A	B	B	-	-	B	B	A	A	B	B	B	B	A
Ps117963	34	12.6	Ps001374	Ps000092	Ps001374	O09_800	0.445766	A	B	B	B	B	B	B	A	B	A	-	B	A	B	B	B	B	A	A	A	B	A	A	B	A	A	A	A	-	B	-	B	A	B	B	A	A	B	B	B	B	A
Ps113343	34	12.9	Ps001374	Ps000092	Ps001374	O09_800	0.763025	A	B	B	B	B	B	B	A	B	A	A	B	A	B	B	B	B	A	A	A	B	A	A	B	A	A	A	A	A	B	B	B	A	-	B	A	A	B	B	B	-	A
Ps113400	34	12.9	Ps001374	Ps000092	Ps001374	O09_800	0.546494	A	B	B	B	B	B	B	A	B	A	-	B	A	B	B	B	B	A	A	A	B	A	A	B	A	A	A	A	A	B	B	-	A	-	B	A	A	B	B	B	B	A
Ps135013	34	12.3	Ps001374	Ps000092	Ps001374	O09_800	0.537094	-	B	B	B	B	B	B	A	B	A	A	B	A	-	B	B	B	A	A	A	B	A	-	B	A	A	A	A	A	B	B	B	A	-	B	A	A	B	B	B	B	A
Ps126021	34	12	Ps001374	Ps000092	Ps001374	O09_800	0.757621	A	B	B	B	B	-	B	A	B	A	A	B	A	B	B	B	B	A	A	A	B	A	A	B	A	A	A	-	A	-	B	B	A	A	B	-	A	B	B	B	-	A
Ps116428	34	12.9	Ps001374	Ps000092	Ps001374	O09_800	0.445766	A	B	B	B	B	B	B	A	B	A	-	B	A	B	B	B	B	A	A	A	B	A	A	B	A	A	A	A	A	B	B	B	A	-	B	A	-	B	-	B	B	A
Ps111362	34	12.9	Ps001374	Ps000092	Ps001374	O09_800	0.546494	A	B	B	B	B	B	B	A	B	A	A	B	A	B	B	B	B	A	A	A	B	A	A	B	A	A	A	A	A	B	B	B	A	-	-	-	A	B	B	B	B	A
Ps127547	34	12.3	Ps000092	O09_800	Ps001374	O09_800	0.217044	-	B	B	B	B	B	B	A	B	A	-	B	A	B	B	B	B	A	A	A	B	A	A	B	-	A	A	A	A	-	B	B	A	-	B	A	A	B	B	B	B	A
Ps129940	34	12	Ps001374	Ps000092	Ps001374	O09_800	0.354539	A	B	B	B	B	B	B	A	B	A	A	B	-	B	B	B	B	A	A	A	B	A	A	B	A	A	A	A	-	B	-	B	A	B	B	A	A	B	B	B	B	-
Ps144873	34	11.4	Ps001374	Ps000092	Ps001374	O09_800	1	A	B	B	B	B	B	B	A	B	A	A	B	A	B	B	B	B	A	A	A	B	A	A	B	A	A	A	A	A	B	B	B	A	-	-	-	A	B	-	B	-	A
Ps126027	34	12	Ps001374	Ps000092	Ps001374	O09_800	0.757621	A	B	B	-	B	-	B	A	B	A	-	B	A	B	B	B	B	A	A	A	B	A	A	B	A	A	A	A	A	B	B	B	A	A	B	A	A	B	B	-	-	A
Ps162088	34	11.1	Ps001374	Ps000092	Ps001374	Ps119473	0.869417	A	B	-	B	B	B	B	A	B	A	-	-	A	B	-	B	B	A	A	A	B	A	A	B	-	A	A	A	A	B	-	-	A	-	B	A	-	B	B	B	B	A
Ps129335	34	11.7	Ps001374	Ps000092	Ps001374	O09_800	0.757621	A	B	B	B	B	B	B	A	B	A	A	B	A	B	-	B	-	A	A	-	B	A	-	B	A	A	A	A	A	-	B	B	A	A	B	A	A	B	B	B	-	A
Ps161976	34	10.8	Ps000092	O09_800	Ps001374	Ps001408	0.621873	A	B	B	B	B	-	B	A	B	-	A	-	A	B	B	B	B	A	A	A	B	A	A	B	-	A	-	A	A	-	B	B	A	-	B	A	A	B	-	-	B	A
Ps162086	34	10.5	Ps001374	Ps000092	Ps001374	O09_800	0.41108	-	B	B	B	B	-	-	-	B	-	A	-	A	B	B	B	B	A	-	A	B	A	-	B	A	A	A	A	A	B	B	B	A	B	B	A	A	B	B	-	B	A
Ps127000	34	11.7	Ps001374	Ps000092	Ps001374	O09_800	0.757621	A	B	B	B	-	-	-	A	B	A	B	B	A	B	B	B	B	A	A	A	B	A	A	B	A	A	A	A	-	B	B	B	A	A	B	A	A	B	B	B	-	A
Ps102094	34	13.2	Ps001374	Ps000092	Ps001374	O09_800	0.768083	A	B	B	B	B	B	B	A	B	A	A	B	A	B	-	B	B	A	A	A	B	A	A	B	A	A	A	A	A	B	B	B	A	A	B	A	A	B	B	B	B	A
Ps120776	34	12.9	Ps001374	Ps000092	Ps001374	O09_800	0.445766	A	B	B	B	B	-	B	A	B	A	-	B	A	B	B	B	B	A	A	A	B	A	A	B	A	A	A	A	A	B	B	B	A	-	B	A	-	B	B	B	B	A
Ps158565	34	10.5	Ps001374	Ps000092	Ps001374	O09_800	0.745603	A	B	-	B	B	-	B	A	-	A	A	-	A	B	B	B	B	A	A	A	B	-	A	B	A	-	A	A	-	B	B	B	A	A	B	A	A	B	B	B	B	A
Ps157631	34	10.8	Ps001374	Ps000092	Ps001374	O09_800	0.745603	A	B	-	B	B	B	B	A	-	A	A	B	A	B	-	-	B	A	A	A	-	A	A	B	A	A	A	A	A	-	-	B	A	B	B	-	A	B	B	B	B	A
Ps133301	34	12	Ps001374	Ps000092	Ps001374	O09_800	0.537094	A	B	B	B	B	-	B	A	B	A	A	-	-	B	B	B	B	A	A	A	B	A	A	B	A	A	A	-	A	B	B	B	A	A	B	A	A	B	B	B	B	-
Ps158639	34	11.1	Ps001374	Ps000092	Ps001374	O09_800	0.516412	A	-	B	-	B	B	B	A	B	A	-	B	A	B	B	B	B	A	A	A	B	-	A	B	-	A	-	A	A	B	B	B	A	B	B	A	A	B	-	-	B	A
Ps108306	34	12.3	Ps001374	Ps000092	Ps001374	O09_800	0.365712	A	B	B	B	B	-	B	-	B	A	B	B	A	B	B	B	B	A	A	-	B	A	A	B	A	A	A	A	A	B	B	B	A	A	-	A	A	B	B	B	B	A
Ps106495	34	12.9	Ps000092	O09_800	Ps001374	O09_800	0.456057	A	B	B	B	B	B	B	A	B	A	-	-	A	B	B	B	B	A	A	A	B	A	-	B	A	A	A	A	A	B	B	B	A	A	B	A	A	B	B	B	B	A
Ps127255	34	12	Ps001374	Ps000092	Ps001374	O09_800	0.537094	-	B	B	B	B	B	B	A	B	A	A	-	A	B	B	B	B	A	A	A	B	A	-	-	A	A	A	A	A	B	B	B	A	-	B	A	A	B	B	B	B	A
Ps163247	34	10.8	Ps001374	Ps000092	Ps001374	O09_800	0.738883	A	B	-	B	B	-	-	A	-	A	-	B	-	B	B	-	B	A	A	A	B	A	A	B	A	A	A	A	A	B	B	B	-	-	B	A	A	B	B	B	B	-
Ps111152	34	12.6	Ps001374	Ps000092	Ps001374	O09_800	0.763025	A	B	B	B	B	-	B	A	B	A	A	B	A	B	B	B	B	A	A	A	B	A	A	B	A	A	A	A	A	B	B	B	A	A	B	A	-	B	-	B	B	A
Ps112121	34	12.6	Ps001374	Ps000092	Ps001374	O09_800	0.546494	A	B	B	B	B	-	B	A	B	A	A	B	A	B	B	B	B	A	A	A	B	A	A	B	A	A	A	A	A	B	B	B	-	-	B	A	A	B	B	-	B	A
Ps133999	34	12.3	Ps001374	Ps000092	Ps001374	O09_800	0.354539	A	B	B	B	B	B	B	A	B	A	A	B	A	B	B	B	B	-	A	A	B	A	A	B	A	A	A	A	A	B	B	B	A	-	B	-	A	B	B	B	B	-
Ps116746	34	12	Ps001374	Ps000092	Ps001374	O09_800	0.285751	A	B	B	B	B	-	B	A	B	A	A	B	-	B	B	B	B	A	A	A	B	A	A	-	A	A	A	A	A	B	B	B	A	B	B	A	A	B	B	B	B	-
Ps127466	34	11.7	Ps001374	Ps000092	Ps001374	O09_800	1	A	B	B	B	B	B	-	A	B	A	A	B	A	B	-	B	B	A	-	A	B	A	A	B	A	A	A	A	A	B	B	B	A	A	B	A	A	-	B	B	B	-
Ps132808	34	11.7	Ps001374	Ps000092	Ps001374	O09_800	0.354539	A	B	B	B	B	-	-	A	B	A	A	B	A	B	B	B	B	-	A	A	B	A	A	B	A	A	A	A	A	B	B	B	-	A	B	A	A	B	B	B	B	-
Ps128669	34	12.3	Ps001374	Ps000092	Ps001374	O09_800	1	A	B	B	B	B	B	B	A	B	A	A	-	A	-	B	B	B	A	A	A	B	A	A	B	A	A	A	A	A	B	B	B	A	-	B	A	A	B	-	B	-	A
Ps161252	34	10.8	Ps000092	O09_800	Ps001374	O09_800	0.621873	A	B	-	B	B	-	B	A	B	-	-	-	A	-	B	B	-	A	A	A	B	-	A	B	A	A	A	A	A	B	B	B	A	-	B	A	A	B	B	B	B	A
Ps144618	34	12	Ps001374	Ps000092	Ps001374	O09_800	0.639412	A	B	B	B	B	B	B	A	-	A	A	B	A	B	-	B	B	A	A	A	B	A	A	B	A	-	A	A	A	B	B	B	A	-	B	A	A	B	B	-	B	A
Ps146715	34	11.4	Ps001374	Ps000092	Ps001374	O09_800	0.527089	A	B	B	B	B	-	B	A	B	A	A	-	A	B	B	-	B	A	A	-	B	A	A	B	A	A	A	A	-	B	B	B	-	A	B	A	A	B	B	B	B	A
Ps143130	34	11.7	Ps000092	O09_800	Ps001374	O09_800	0.639412	A	B	-	B	B	B	B	A	B	A	-	-	-	B	-	B	B	A	A	A	B	-	A	B	A	A	A	A	A	B	-	B	A	A	B	A	A	B	B	B	B	A
Ps108910	34	12.3	Ps001374	Ps000092	Ps001374	O09_800	0.365712	A	B	B	B	B	B	B	A	B	A	A	B	A	B	B	B	B	A	A	A	B	A	A	B	A	-	A	A	A	B	B	B	A	A	B	-	-	B	B	B	B	A
Ps131708	34	12.3	Ps001374	Ps000092	Ps001374	O09_800	0.537094	A	B	B	B	B	B	B	A	B	A	A	B	A	B	B	B	B	A	A	A	B	-	A	B	A	A	A	A	-	B	B	B	A	-	-	A	A	B	B	-	B	A
Ps163604	34	10.2	Ps000092	O09_800	Ps001374	Ps001408	0.61209	A	B	B	-	B	-	B	A	-	-	-	-	A	B	B	B	B	A	A	A	B	A	A	B	-	A	-	A	A	-	B	-	A	B	B	A	A	B	B	B	B	A
Ps101859	34	12.9	Ps001374	Ps000092	Ps001374	O09_800	0.555346	A	-	B	B	B	B	B	A	B	A	A	B	A	B	B	B	B	A	A	A	B	A	A	B	-	A	A	A	A	B	B	B	A	A	B	A	A	B	B	B	B	A
Ps120691	34	12.3	Ps001374	Ps000092	Ps001374	O09_800	0.445766	A	B	B	B	B	B	B	A	B	-	A	-	A	B	B	B	B	A	-	A	-	A	A	B	A	A	A	A	A	B	B	B	A	-	B	A	A	B	B	B	B	A
Ps146366	34	11.7	Ps001374	Ps000092	Ps001374	O09_800	0.527089	A	B	B	B	B	B	B	A	-	A	-	B	A	-	-	B	B	A	A	A	B	A	A	B	A	A	A	A	A	B	B	B	A	B	B	-	-	B	B	-	B	A
Ps130684	34	11.7	Ps001374	Ps000092	Ps001374	O09_800	0.217044	A	B	B	B	B	B	B	-	B	A	A	B	A	B	B	B	B	A	A	A	B	A	A	B	A	A	-	A	A	B	B	B	A	B	B	A	A	B	B	-	-	A
Ps163629	34	9.9	Ps001374	Ps000092	Ps001374	Ps119473	0.61209	A	B	-	-	B	-	B	A	-	A	A	-	A	B	-	B	B	A	A	A	B	A	-	B	-	A	A	A	A	B	-	B	A	-	B	A	A	B	B	-	-	A
Ps153241	34	11.4	Ps001374	Ps000092	Ps001374	O09_800	0.262332	A	B	B	B	B	B	B	A	B	A	-	B	A	-	B	B	B	A	A	A	B	A	A	B	-	A	A	-	A	B	B	B	A	B	B	-	A	B	B	B	B	A
Ps150979	34	11.4	Ps001374	Ps000092	Ps001374	O09_800	0.75183	A	B	B	B	B	B	B	A	B	-	A	-	A	-	B	B	B	-	A	A	B	A	A	B	A	A	A	A	A	B	B	B	A	A	B	A	A	-	B	B	B	A
Ps160201	34	11.1	Ps001374	Ps000092	Ps001374	O09_800	0.516412	-	B	B	B	B	B	B	A	B	A	-	B	A	B	-	B	-	-	A	-	B	A	A	B	A	A	A	A	A	B	-	B	A	B	B	A	A	B	B	-	-	A
Ps129844	34	12	Ps001374	Ps000092	Ps001374	O09_800	0.757621	A	B	B	B	B	-	B	A	B	A	A	B	A	B	B	B	-	A	A	A	B	A	-	B	-	A	A	A	A	B	-	B	A	A	B	A	A	B	B	B	B	A
Ps119646	34	12.3	Ps001374	Ps000092	Ps001374	O09_800	0.445766	A	B	B	B	B	B	B	A	B	A	A	B	A	B	B	B	B	A	A	A	-	A	A	B	A	A	-	A	A	B	B	-	A	B	B	A	-	B	B	B	B	A
Ps131328	34	12.3	Ps001374	Ps000092	Ps001374	O09_800	1	A	B	B	B	B	-	B	A	B	A	-	B	A	B	B	-	B	A	A	A	B	A	A	-	A	A	A	A	A	B	B	B	A	A	B	A	A	B	B	B	B	A
Ps129228	34	12	Ps001374	Ps000092	Ps001374	O09_800	0.537094	A	B	B	B	B	-	B	A	B	A	A	B	A	B	B	-	-	-	A	A	B	A	A	B	A	-	A	A	A	B	B	B	A	B	B	A	A	B	B	B	B	A
Ps145570	34	11.1	Ps001374	Ps000092	Ps001374	O09_800	0.113846	A	B	B	B	B	B	B	A	B	A	B	B	A	B	-	B	B	A	A	-	B	A	-	B	A	-	-	-	A	B	B	B	-	A	B	A	A	-	B	B	B	A
Ps150059	34	11.1	Ps001374	Ps000092	Ps001374	O09_800	0.342782	A	B	B	B	B	-	B	A	B	A	A	B	-	B	B	B	B	-	A	A	B	A	A	B	A	A	-	A	A	-	B	B	-	B	B	A	A	B	B	B	-	A
Ps162668	34	10.5	Ps000092	O09_800	Ps001374	O09_800	0.504985	-	B	B	-	B	-	B	A	B	-	-	-	A	B	B	B	B	A	A	A	B	A	A	B	A	A	A	A	-	B	B	B	A	-	B	A	A	-	-	B	B	A
Ps142137	34	12.3	Ps001374	Ps000092	Ps001374	O09_800	0.43488	A	B	-	B	B	B	B	-	-	A	-	B	A	B	B	B	B	A	A	A	B	A	A	B	A	A	A	A	A	B	B	B	A	-	B	A	A	B	B	B	B	A
Ps119942	34	12.6	Ps001374	Ps000092	Ps001374	O09_800	0.647315	A	B	B	B	-	B	B	A	B	A	A	B	A	B	B	B	B	A	A	A	B	A	A	B	A	A	A	A	A	B	B	B	A	-	B	A	A	B	B	B	B	A
Ps142348	34	12.3	Ps001374	Ps000092	Ps001374	O09_800	0.274299	A	B	B	B	B	B	-	A	B	A	-	B	A	B	B	B	B	A	-	A	B	A	A	B	A	A	A	A	-	B	B	B	A	-	B	A	-	B	B	B	B	A
Ps113683	34	12.6	Ps001374	Ps000092	Ps001374	O09_800	0.365712	A	B	B	B	B	B	B	A	B	A	-	B	A	B	B	B	B	A	A	A	B	A	A	B	A	A	A	-	A	B	B	-	A	A	B	A	-	B	B	B	B	A
Ps124925	34	11.7	Ps001374	Ps000092	Ps001374	O09_800	0.537094	A	B	B	B	B	B	-	A	B	A	A	B	-	B	-	B	B	-	A	A	B	A	A	B	A	A	A	A	A	B	B	B	-	A	B	A	A	B	B	B	-	A
Ps132216	34	12	Ps001374	Ps000092	Ps001374	O09_800	0.757621	A	B	B	B	B	-	B	A	B	-	A	B	A	B	B	B	B	A	-	A	B	A	A	B	A	A	A	A	A	B	B	B	A	-	B	A	A	B	B	B	B	A
Ps160905	34	11.1	Ps001374	Ps000092	Ps001374	O09_800	0.869417	A	B	B	B	B	-	B	A	B	A	-	B	A	-	B	B	B	A	A	A	B	-	A	B	A	A	A	A	A	B	-	B	A	-	B	A	A	B	-	B	-	A
Ps151563	34	11.4	Ps001374	Ps000092	Ps001374	O09_800	0.75183	A	B	B	-	B	B	B	A	-	A	A	B	A	B	-	B	B	A	A	A	B	A	A	B	A	A	A	A	A	B	-	B	A	A	B	A	A	B	-	B	-	-
Ps122816	34	12	Ps001374	Ps000092	Ps001374	O09_800	0.878794	A	B	B	B	B	B	-	A	B	A	A	B	A	B	-	-	B	A	A	A	B	-	A	B	A	A	A	A	A	B	B	B	A	B	B	A	A	B	B	B	B	A
Ps138694	34	11.7	Ps001374	Ps000092	Ps001374	O09_800	0.875896	A	-	B	B	B	B	B	A	B	A	A	B	A	B	B	B	B	A	A	A	-	A	A	B	A	A	A	A	A	B	B	B	A	B	-	A	A	-	B	-	B	A
Ps119570	34	12.6	Ps001374	Ps000092	Ps001374	O09_800	0.647315	A	B	B	B	B	-	B	A	B	A	A	B	A	B	B	B	B	A	-	A	B	A	A	-	A	A	A	A	A	B	B	B	A	-	B	A	A	B	B	B	B	A
Ps104751	34	12.9	Ps001374	Ps000092	Ps001374	O09_800	0.881497	A	B	B	B	B	B	B	A	B	A	A	B	A	B	B	B	-	A	A	A	B	A	A	B	A	A	A	A	A	B	-	B	A	A	B	A	A	B	B	B	B	A
Ps139525	34	12	Ps001374	Ps000092	Ps001374	O09_800	0.639412	A	B	B	B	B	-	B	A	B	A	A	B	A	B	B	-	B	A	A	A	B	A	A	-	A	A	A	A	-	B	B	B	A	-	B	A	A	B	B	B	B	A
Ps162282	34	10.8	Ps000092	O09_800	Ps001374	O09_800	0.41108	-	B	B	-	B	B	B	A	B	A	-	B	A	B	B	B	B	A	A	A	B	A	A	B	-	-	A	A	A	B	B	B	A	-	-	A	A	-	-	B	B	-
Ps134412	34	12	Ps001374	Ps000092	Ps001374	O09_800	0.354539	A	B	B	B	B	B	B	A	B	A	A	B	A	B	B	B	-	A	A	-	B	A	A	B	A	A	-	A	A	B	B	B	A	A	B	-	-	B	B	B	B	A
Ps138924	34	12	Ps001374	Ps000092	Ps001374	O09_800	0.639412	A	B	B	B	B	B	B	A	B	A	A	B	A	-	B	B	B	-	A	A	B	A	A	B	A	A	A	A	A	B	B	B	A	-	B	A	-	B	B	B	B	A
Ps127145	34.4	10	Ps000092	O09_800	Ps001374	O09_800	1	A	B	B	-	B	B	B	A	B	A	A	A	A	B	B	-	B	A	A	A	B	A	A	B	A	A	A	A	A	B	B	B	A	B	B	-	A	B	-	B	B	A
Ps153192	34.4	8.9	Ps000092	O09_800	Ps001374	O09_800	0.262332	A	B	B	B	B	B	B	A	B	-	A	A	-	B	-	-	B	A	-	A	B	A	A	B	A	A	A	A	-	B	B	B	A	B	B	-	A	B	B	B	B	-
Ps151193	34.4	9.4	Ps000092	O09_800	Ps001374	O09_800	0.527089	A	B	B	B	B	-	B	A	B	A	A	A	-	B	-	B	B	A	A	A	B	A	A	B	A	A	A	A	-	B	B	-	-	B	B	A	-	B	B	B	B	A
Ps106145	34.6	11.2	Ps000092	O09_800	Ps001374	O09_800	0.881497	A	B	B	B	B	B	B	A	B	A	A	A	A	-	B	B	B	A	A	A	B	A	A	B	A	A	A	A	A	B	B	B	A	-	B	A	A	B	B	B	B	A
Ps137093	34.6	11.4	Ps000092	O09_800	Ps001374	O09_800	0.639412	A	B	-	B	B	B	B	A	B	A	B	A	A	B	B	B	B	A	-	A	B	A	A	B	A	A	A	-	A	B	B	B	A	-	B	A	A	B	B	-	B	A
Ps147007	34.6	9.7	Ps000092	O09_800	Ps001374	O09_800	0.75183	A	B	B	B	B	B	B	A	B	A	A	A	-	B	B	B	B	A	A	A	B	A	A	B	A	A	A	A	A	B	B	B	A	-	B	A	A	B	B	B	-	-
Ps123512	34.6	10.3	Ps000092	O09_800	Ps001374	O09_800	0.647315	A	B	B	B	B	B	B	-	B	A	A	A	A	B	B	B	B	A	A	A	-	A	A	B	A	A	A	A	A	-	B	B	A	-	B	A	A	B	B	B	B	-
Ps144613	34.6	11.4	Ps000092	O09_800	Ps001374	O09_800	0.274299	A	B	-	B	B	B	B	A	B	A	-	A	A	B	B	B	B	A	A	A	B	A	-	B	A	A	A	A	A	B	B	B	A	B	B	A	-	B	B	B	B	-
Ps144850	34.6	9.4	Ps000092	O09_800	Ps001374	O09_800	0.75183	A	B	B	B	B	B	B	A	B	A	-	A	A	B	-	B	B	A	A	A	B	A	A	B	A	A	A	A	-	B	B	-	A	B	-	A	A	B	-	B	B	-
Ps112412	34.6	10.6	Ps000092	O09_800	Ps001374	O09_800	0.763025	A	B	B	B	-	B	B	A	B	A	A	A	A	B	B	B	B	A	A	A	B	-	A	B	A	A	A	A	A	-	B	B	A	-	B	A	A	B	B	B	B	A
Ps123988	34.6	10.3	Ps000092	O09_800	Ps001374	O09_800	0.878794	A	B	B	B	B	B	B	A	B	A	A	A	A	B	-	B	B	A	A	A	-	A	-	B	A	A	A	A	A	B	B	B	A	-	B	A	A	B	B	B	-	A
Ps144524	34.6	10	Ps000092	O09_800	Ps001374	O09_800	0.875896	A	B	B	-	B	-	-	A	B	A	A	A	A	B	B	B	B	A	A	A	B	A	-	B	A	A	A	A	A	B	B	B	A	-	B	A	-	B	B	B	B	A
Ps123688	34.6	10.6	Ps000092	O09_800	Ps001374	O09_800	0.878794	A	B	B	B	-	B	B	A	B	A	A	A	A	B	B	B	B	A	A	A	B	-	A	B	A	A	A	A	A	B	B	B	A	-	B	A	A	B	B	-	B	A
Ps126835	34.6	10	Ps000092	O09_800	Ps001374	O09_800	0.757621	A	B	B	B	B	-	B	A	B	-	A	A	A	-	B	B	B	A	A	-	B	A	A	B	A	A	A	A	A	B	B	B	-	A	B	A	A	B	B	B	B	A
Ps134515	34.6	10.3	Ps000092	O09_800	Ps001374	O09_800	0.757621	A	B	B	B	B	B	-	-	B	A	A	A	A	B	B	B	B	A	A	A	B	A	A	B	A	A	A	A	A	B	B	B	A	-	B	A	A	B	-	B	B	-
Ps113806	34.6	10.6	Ps000092	O09_800	Ps001374	O09_800	0.763025	A	B	B	B	B	B	B	A	B	A	A	A	A	B	B	B	B	A	A	A	B	A	-	B	A	-	A	A	A	B	B	B	A	A	B	A	A	B	-	B	B	A
Ps138685	34.6	9.7	Ps000092	O09_800	Ps001374	O09_800	0.875896	A	B	B	B	B	-	B	A	B	-	A	A	-	B	B	-	B	A	A	A	B	A	A	B	A	A	A	A	A	-	B	B	A	A	B	A	A	B	B	-	B	A
Ps136487	34.6	9.4	Ps000092	O09_800	Ps001374	O09_800	0.875896	A	B	B	B	B	B	-	A	B	-	A	A	A	B	B	B	-	A	A	A	B	-	-	B	A	A	A	A	A	B	-	B	A	A	B	A	A	B	B	B	B	A
Ps105878	34.6	10.6	Ps000092	O09_800	Ps001374	O09_800	0.881497	A	B	B	B	B	B	B	A	-	A	A	A	A	B	B	B	B	A	A	A	B	-	A	B	A	A	A	A	A	B	-	B	A	A	B	A	A	B	B	B	B	A
Ps113279	34.6	10.6	Ps000092	O09_800	Ps001374	O09_800	0.763025	A	B	B	B	B	-	B	A	B	A	A	A	A	B	B	B	B	A	A	A	B	A	-	B	A	A	A	A	A	B	B	B	A	A	B	-	A	B	B	B	B	A
Ps154140	34.6	9.1	Ps000092	O09_800	Ps001374	O09_800	0.87278	A	B	B	B	B	-	B	A	B	A	A	A	A	-	B	B	B	A	A	A	B	A	A	-	A	A	A	A	-	B	B	B	A	-	B	A	-	-	-	B	B	A
Ps102059	34.6	11.2	Ps000092	O09_800	Ps001374	O09_800	0.555346	A	B	B	-	B	B	B	A	B	A	-	A	A	B	B	B	B	A	A	A	B	A	A	B	A	A	A	A	A	B	B	B	A	B	B	A	A	B	B	B	B	A
Ps124238	34.6	10.3	Ps000092	O09_800	Ps001374	O09_800	0.647315	A	B	B	B	B	B	B	A	B	A	A	A	A	B	B	B	B	A	A	A	-	A	A	B	A	A	A	A	A	B	B	-	A	-	B	A	-	B	B	B	B	-
Ps139214	34.6	10	Ps000092	O09_800	Ps001374	O09_800	0.875896	A	B	B	B	B	-	-	A	B	A	A	A	A	B	-	B	B	A	A	A	B	A	-	B	A	A	A	A	A	B	B	B	A	-	B	A	A	B	-	B	B	A
Ps150070	34.6	9.4	Ps000092	O09_800	Ps001374	O09_800	1	-	B	B	B	B	-	B	A	-	A	A	A	A	B	B	B	B	A	A	A	B	A	A	B	A	A	A	A	A	B	B	B	A	A	B	A	-	B	B	B	-	-
Ps108453	34.6	8.9	Ps000092	O09_800	Ps001374	O09_800	0.546494	A	B	B	B	B	A	B	-	B	A	A	A	A	B	B	B	B	A	-	-	B	A	A	B	A	A	A	A	A	B	B	B	A	B	B	A	A	-	B	B	B	A
Ps135857	34.6	9.7	Ps000092	O09_800	Ps001374	O09_800	0.639412	A	B	B	-	B	B	B	A	B	A	A	A	A	B	B	B	B	A	A	-	B	-	A	B	A	A	A	A	A	-	B	B	-	-	B	A	A	B	B	B	B	A
Ps160262	34.6	9.1	Ps000092	O09_800	Ps001374	O09_800	1	A	B	B	B	B	-	B	A	B	A	A	A	A	B	B	B	B	A	-	-	B	A	A	B	A	A	A	A	A	B	B	B	A	-	-	A	A	B	-	B	-	A
Ps156080	34.6	9.4	Ps000092	O09_800	Ps001374	O09_800	0.87278	A	B	-	B	B	-	-	A	B	A	A	A	-	B	B	B	B	A	A	A	B	A	A	B	A	A	A	A	A	B	B	B	A	-	B	A	A	B	B	-	B	-
Ps131451	34.6	9.7	Ps000092	O09_800	Ps001374	O09_800	1	A	B	B	B	B	-	B	A	B	-	A	A	A	B	B	B	-	A	A	A	B	A	A	B	A	A	A	A	A	-	B	B	A	A	B	A	A	B	B	B	B	-
Ps143175	34.6	9.7	Ps000092	O09_800	Ps001374	O09_800	0.875896	A	B	B	B	B	-	B	-	B	A	A	A	A	B	B	B	B	A	A	A	B	A	A	B	A	A	-	A	A	B	-	B	-	A	B	A	A	B	B	-	B	A
Ps117374	34.6	10.3	Ps000092	O09_800	Ps001374	O09_800	0.878794	A	B	B	B	-	B	B	A	B	A	A	A	A	-	B	B	B	A	A	-	B	A	A	B	A	A	A	A	A	B	B	B	A	A	-	A	A	B	B	B	B	A
Ps133631	34.6	9.7	Ps000092	O09_800	Ps001374	O09_800	1	A	B	B	B	B	-	B	A	-	A	A	A	A	-	B	B	B	-	A	A	B	A	A	B	A	A	A	A	A	B	B	B	A	A	B	A	A	-	B	B	B	A
Ps100841	34.6	10.9	Ps000092	O09_800	Ps001374	O09_800	1	A	B	B	B	B	B	B	A	B	A	A	A	A	B	B	B	B	A	A	A	B	A	A	B	A	A	A	A	A	B	-	B	A	A	B	A	A	B	-	B	B	A
Ps161167	34.6	8.9	Ps000092	O09_800	Ps001374	O09_800	0.869417	A	B	B	B	B	B	B	A	B	A	A	A	A	B	-	B	-	-	A	A	B	A	-	-	A	-	A	A	A	-	B	B	A	-	-	A	A	B	B	-	B	A
Ps103020	34.6	10.6	Ps000092	O09_800	Ps001374	O09_800	0.881497	A	B	B	B	B	-	-	A	B	A	A	A	A	B	B	B	B	A	A	A	B	A	A	B	A	A	A	A	A	B	B	B	A	A	B	A	A	-	B	B	B	A
Ps132161	34.6	10	Ps000092	O09_800	Ps001374	O09_800	0.757621	A	B	B	B	B	-	-	A	B	A	A	A	A	B	B	B	B	A	A	A	B	A	A	B	A	A	A	A	-	B	B	B	A	A	B	A	A	B	B	B	B	-
Ps121957	34.6	10.6	Ps000092	O09_800	Ps001374	O09_800	0.878794	A	B	B	B	B	-	B	A	B	A	-	A	A	B	B	B	B	A	A	A	B	A	A	B	A	A	A	A	A	B	B	B	A	B	B	A	A	B	B	-	B	A
Ps156055	34.6	9.4	Ps000092	O09_800	Ps001374	O09_800	0.42334	A	B	B	B	B	B	-	A	B	-	A	A	A	B	B	-	B	A	A	A	B	A	-	B	A	-	A	A	-	B	B	B	A	-	B	-	A	B	B	B	B	A
Ps122998	34.7	8.9	Ps000092	O09_800	Ps001374	O09_800	0.878794	A	-	B	B	B	A	B	A	-	A	A	A	A	B	B	B	B	-	A	A	B	A	A	B	A	-	A	A	A	B	B	B	A	A	B	A	A	B	B	B	B	A
Ps124413	34.9	10.6	Ps000092	O09_800	Ps001374	O09_800	0.537094	A	B	B	B	-	B	B	A	B	-	B	A	A	B	B	B	B	A	A	A	B	A	A	B	A	A	A	A	A	B	B	B	-	-	B	A	A	B	B	B	-	A
Ps121927	34.9	12	Ps000092	O09_800	Ps001374	O09_800	0.878794	A	B	-	B	B	-	B	A	B	A	-	A	A	B	B	B	B	A	A	A	-	A	A	B	A	A	A	A	A	B	B	B	A	-	B	A	A	B	B	B	B	A
Ps134263	34.9	9.2	Ps000092	O09_800	Ps001374	Ps001408	0.757621	A	B	B	B	B	A	B	-	-	A	A	A	A	B	B	B	B	A	A	-	B	A	A	B	-	A	A	A	A	B	B	B	A	-	B	A	A	B	B	-	B	A
Ps122400	34.9	10.9	Ps000092	O09_800	Ps001374	O09_800	0.445766	A	B	B	B	B	-	B	A	B	A	-	A	A	B	B	B	B	A	A	-	B	A	A	B	A	-	A	A	A	B	B	B	A	-	B	A	A	B	B	B	B	A
Ps116547	34.9	10.9	Ps000092	O09_800	Ps001374	O09_800	0.878794	A	B	B	B	B	B	B	A	B	A	-	A	A	B	B	B	-	A	A	A	B	A	A	B	A	A	-	A	A	B	B	B	A	A	B	A	A	B	B	B	B	A
Ps158621	34.9	9.4	Ps000092	O09_800	Ps001374	Ps001408	0.516412	-	B	B	B	-	-	B	A	B	A	A	-	A	B	B	B	B	A	A	A	B	-	A	B	B	A	A	A	A	-	B	B	A	-	-	A	-	B	B	-	B	A
Ps139695	34.9	10.3	Ps000092	O09_800	Ps001374	O09_800	0.639412	A	B	B	B	B	B	B	A	B	-	-	A	A	B	B	B	B	A	A	A	B	A	A	B	A	A	A	A	A	-	B	B	A	-	B	A	A	B	-	B	B	A
Ps127588	34.9	9.2	Ps000092	O09_800	Ps000092	O09_800	0.122823	A	B	B	B	B	B	B	A	B	A	A	A	-	B	B	B	B	-	A	A	B	A	A	B	B	-	A	A	A	B	B	B	-	B	B	-	A	B	B	-	B	A
Ps115133	34.9	10.9	Ps000092	O09_800	Ps001374	O09_800	0.878794	A	B	B	B	B	B	B	A	-	A	-	A	A	B	B	B	B	A	A	A	B	-	A	B	A	A	A	A	A	B	B	B	A	A	B	A	A	B	B	B	-	A
Ps110617	34.9	11.2	Ps000092	O09_800	Ps001374	O09_800	0.546494	A	B	B	B	B	B	B	A	B	A	-	A	A	B	B	B	B	-	A	A	B	A	A	B	A	A	A	A	A	B	B	B	A	-	B	A	A	B	B	B	B	A
Ps159174	34.9	9.4	Ps000092	O09_800	Ps001374	Ps001408	0.516412	A	B	B	-	B	-	B	A	B	A	A	A	A	B	B	B	B	-	A	A	B	A	A	B	-	A	-	-	A	B	B	B	A	-	B	A	A	B	B	-	B	A
Ps112491	34.9	9.7	Ps000092	O09_800	Ps000092	Ps001408	0.546494	-	B	B	B	B	-	B	A	B	A	A	A	A	B	B	B	B	A	A	A	B	A	A	B	B	A	A	A	A	B	B	B	-	-	B	A	A	B	B	B	B	A
Ps133165	34.9	9.4	Ps000092	O09_800	Ps000092	Ps001447	0.217044	A	B	-	B	B	B	B	A	B	A	A	A	A	B	B	B	B	A	A	-	B	A	-	B	B	A	A	A	A	B	B	B	-	B	B	A	A	B	B	B	B	A
Ps159230	34.9	9.4	Ps000092	O09_800	Ps001374	Ps001408	1	A	B	B	B	B	-	B	A	B	-	A	A	A	B	B	B	B	A	A	A	-	A	A	-	-	A	A	A	A	B	B	-	A	-	B	A	-	B	B	B	B	A
Ps147403	34.9	10	Ps000092	O09_800	Ps001374	Ps119473	0.75183	A	B	-	-	-	B	-	A	B	A	A	A	A	B	B	B	B	A	A	A	B	A	A	B	-	A	A	A	A	B	B	B	A	-	B	A	A	B	B	-	B	A
Ps156527	34.9	9.7	Ps000092	O09_800	Ps001374	O09_800	0.87278	A	-	B	B	-	-	B	A	B	-	B	A	A	B	-	B	B	A	A	A	B	A	A	B	A	A	A	-	A	B	-	B	-	A	B	A	A	B	B	B	B	A
Ps155544	34.9	9.7	Ps000092	O09_800	Ps001374	O09_800	0.42334	A	B	B	B	B	B	B	A	B	A	B	A	A	B	B	B	B	A	A	A	B	A	-	-	A	A	A	A	A	B	B	B	A	-	B	-	-	B	B	B	-	A
Ps129085	34.9	10.6	Ps000092	O09_800	Ps001374	O09_800	0.537094	A	B	B	B	B	B	B	A	B	A	-	A	-	B	B	B	B	A	A	-	B	A	A	B	A	A	A	A	A	B	-	B	-	A	B	A	A	B	B	B	B	A
Ps101954	34.9	10.3	Ps000092	O09_800	Ps000092	O09_800	0.555346	A	B	B	B	B	B	B	A	B	A	A	A	A	B	B	B	B	A	A	A	B	A	A	B	B	A	A	A	A	B	B	B	A	B	B	A	A	B	B	-	B	A
Ps133090	34.9	9.2	Ps000092	O09_800	Ps000092	O09_800	0.354539	A	B	B	B	B	B	B	A	B	-	A	A	A	B	B	B	B	A	A	A	B	A	A	B	B	-	A	A	A	B	B	B	A	B	B	A	A	B	-	B	B	A
Ps159885	34.9	9.4	Ps000092	O09_800	Ps001374	Ps001408	1	A	B	B	B	B	-	B	A	B	A	A	A	A	-	B	B	-	A	A	A	B	A	A	B	-	A	A	A	A	B	-	B	A	-	B	A	A	-	B	B	B	-
Ps158151	34.9	9.4	Ps000092	O09_800	Ps001374	O09_800	0.33039	-	B	B	B	B	B	-	A	B	A	B	A	A	B	B	-	B	A	A	A	B	A	A	B	A	-	A	-	A	B	B	-	A	-	B	A	-	B	-	B	B	A
Ps129285	34.9	10.6	Ps000092	O09_800	Ps001374	Ps001408	1	A	B	B	-	B	-	B	A	B	A	A	A	A	B	B	B	B	A	A	A	B	A	A	B	-	A	A	A	A	B	B	B	A	-	B	A	A	B	B	B	-	A
Ps143709	34.9	10.3	Ps000092	O09_800	Ps001374	Ps001408	0.875896	A	-	B	B	B	B	B	A	B	A	A	-	A	-	B	B	B	A	A	A	B	A	A	-	B	A	A	A	A	B	B	B	A	-	B	A	A	B	B	B	-	A
Ps120306	34.9	9.4	Ps000092	O09_800	Ps000092	O09_800	0.445766	A	B	B	B	B	B	-	A	B	A	A	A	A	B	B	B	B	A	-	A	-	A	A	B	B	A	A	A	A	B	B	B	A	B	B	A	A	B	B	B	B	A
Ps136743	34.9	10.3	Ps000092	O09_800	Ps001374	Ps001408	0.639412	A	B	B	-	B	B	B	A	B	A	-	A	A	B	B	B	B	A	A	A	B	A	A	-	-	A	A	A	A	B	B	-	A	B	B	A	A	B	B	B	-	A
Ps113546	34.9	11.2	Ps000092	O09_800	Ps001374	O09_800	1	A	B	B	B	B	-	-	A	B	A	-	A	A	B	B	B	B	A	A	A	B	A	A	B	A	A	A	A	A	B	B	B	A	A	B	A	A	B	B	B	B	A
Ps145163	34.9	10	Ps000092	O09_800	Ps001374	O09_800	1	-	B	B	B	B	B	B	A	-	A	-	A	A	B	B	B	-	A	A	A	B	A	A	B	A	A	A	A	-	B	B	B	A	A	B	A	A	-	B	B	B	A
Ps143734	34.9	8.9	Ps000092	O09_800	Ps000092	O09_800	0.639412	A	B	B	B	B	B	B	A	B	-	A	A	A	-	B	-	B	A	A	A	B	A	A	-	B	A	A	A	A	B	B	B	-	B	B	A	A	B	B	-	B	A
Ps156747	34.9	11.1	Ps000092	O09_800	Ps001374	O09_800	0.87278	A	B	-	B	B	-	B	A	B	A	-	A	A	-	B	B	-	A	A	-	B	A	A	B	A	A	-	A	A	-	B	B	A	A	B	A	A	B	B	B	B	A
Ps124733	34.9	10.6	Ps000092	O09_800	Ps001374	Ps001408	0.537094	A	B	B	-	B	B	B	A	B	A	A	-	A	B	B	B	B	A	A	A	B	A	A	B	B	A	A	A	-	B	B	B	A	-	B	A	A	B	B	-	-	A
Ps103610	35.1	10	Ps000092	O09_800	Ps001374	Ps001408	0.881497	-	B	B	B	B	A	B	A	B	A	A	A	A	B	B	-	B	A	A	A	B	A	A	B	B	A	A	A	A	B	B	B	A	A	B	A	A	B	B	B	B	A
Ps107375	35.1	9.7	Ps000092	O09_800	Ps001374	Ps001408	0.365712	A	B	B	B	B	B	B	A	B	A	A	A	A	B	B	B	B	A	A	A	B	A	B	B	B	A	A	A	A	B	B	-	-	-	B	A	A	B	-	B	B	A
Ps142161	35.2	10.3	Ps000092	O09_800	Ps000092	Ps001408	0.274299	A	B	B	B	B	B	B	-	B	-	A	A	A	-	B	B	-	A	A	-	B	A	A	B	B	A	A	A	A	B	B	B	-	-	B	A	A	B	B	B	B	A
Ps129783	35.2	10.6	Ps000092	O09_800	Ps000092	Ps001408	0.537094	A	B	B	B	B	B	B	-	B	A	A	A	A	-	B	B	B	A	A	A	B	A	A	B	B	A	A	A	A	B	B	-	A	-	B	-	A	B	B	B	B	A
Ps107328	35.2	11.2	Ps000092	O09_800	Ps000092	Ps001408	0.2278	A	B	B	B	B	B	-	A	B	-	B	A	A	B	B	B	B	A	A	A	B	A	A	B	B	A	A	A	A	-	B	B	A	B	B	-	A	B	B	B	B	A
Ps113461	35.2	11.2	Ps000092	O09_800	Ps000092	Ps001408	0.546494	A	B	B	B	B	B	B	A	B	A	A	A	A	B	B	B	B	A	A	A	B	A	A	B	B	A	A	A	A	B	B	B	-	-	B	A	A	B	B	B	B	A
Ps158943	35.2	10.8	Ps000092	O09_800	Ps000092	Ps001447	0.516412	A	B	-	B	B	B	B	A	B	A	B	A	A	B	B	B	-	A	A	A	B	A	A	B	B	A	-	-	A	B	-	B	-	B	B	A	A	B	B	-	-	A
Ps121522	35.2	10.9	Ps000092	O09_800	Ps000092	Ps001408	0.445766	A	B	B	B	B	-	B	A	B	-	A	A	A	B	B	B	B	A	A	A	B	-	A	B	B	-	A	A	A	B	B	B	A	A	B	A	A	B	-	B	B	A
Ps138769	35.2	10.3	Ps000092	O09_800	Ps000092	Ps001408	0.274299	A	B	B	B	B	B	B	A	B	-	A	A	A	B	B	B	-	A	A	-	B	A	A	B	B	A	A	A	A	B	B	B	-	-	B	-	A	B	B	B	-	A
Ps161943	35.2	9.1	Ps000092	O09_800	Ps000092	Ps119473	0.869417	-	B	-	-	-	-	B	A	B	A	A	A	A	B	B	B	-	A	A	A	B	A	A	B	B	A	A	A	A	B	B	B	A	-	B	A	A	B	-	B	B	A
Ps130243	35.2	10.6	Ps000092	O09_800	Ps000092	Ps001408	1	A	B	B	B	B	-	B	A	B	A	A	A	A	B	B	B	-	A	A	A	B	A	A	B	B	A	A	A	A	B	-	B	A	-	B	A	A	B	B	B	B	A
Ps131490	35.2	10.6	Ps000092	O09_800	Ps000092	Ps001408	1	A	B	B	B	B	B	B	A	-	A	A	A	A	-	B	B	-	-	A	A	B	A	A	B	B	A	A	A	A	-	B	B	A	A	B	A	A	B	B	B	B	A
Ps101973	35.2	11.8	Ps000092	O09_800	Ps000092	Ps001408	0.555346	A	B	B	B	B	B	B	A	B	A	A	A	A	B	B	B	B	A	A	A	B	A	A	B	B	A	A	A	A	B	B	B	A	-	B	A	A	B	B	B	B	A
Ps105506	35.2	11.5	Ps000092	O09_800	Ps000092	Ps001408	0.654721	A	B	B	B	B	-	B	A	B	A	A	A	A	B	B	B	B	A	A	A	B	A	A	B	B	A	A	A	A	B	B	B	A	-	B	A	A	B	B	B	B	A
Ps158766	35.2	9.4	Ps000092	O09_800	Ps000092	Ps001408	0.516412	A	B	B	B	B	B	B	A	B	A	A	A	A	-	-	B	-	A	A	-	B	A	-	B	B	A	A	-	-	B	B	B	A	-	B	A	A	B	B	B	-	A
Ps150182	35.2	10	Ps000092	O09_800	Ps000092	Ps001408	0.75183	A	B	B	B	-	-	B	A	B	A	A	A	A	B	B	B	B	A	-	A	-	A	A	B	B	A	A	A	-	B	B	B	A	-	B	A	A	B	-	B	B	A
Ps122136	35.2	10.9	Ps000092	O09_800	Ps000092	Ps001408	0.878794	A	B	B	B	B	-	B	A	B	A	A	A	A	B	B	B	B	A	A	A	B	A	A	-	B	A	A	A	A	-	B	B	A	A	B	A	A	B	B	-	B	A
Ps119697	35.2	10.9	Ps000092	O09_800	Ps000092	Ps001408	0.878794	A	B	B	B	-	B	B	A	B	A	A	A	A	B	B	B	B	A	A	A	B	A	A	B	B	A	A	A	A	B	B	-	A	A	B	-	A	B	B	B	B	A
Ps128362	35.2	10.6	Ps000092	O09_800	Ps000092	Ps001408	0.537094	A	B	B	B	B	-	B	A	B	A	A	A	A	B	B	B	B	-	-	A	B	A	A	B	B	A	-	A	A	-	B	B	A	A	B	A	A	B	B	B	B	A
Ps105547	35.2	11.5	Ps000092	O09_800	Ps000092	Ps001408	0.654721	A	B	B	-	B	B	B	A	B	A	A	A	A	B	B	B	B	A	A	A	B	A	A	B	B	A	A	A	A	B	B	B	A	-	B	A	A	B	-	B	B	A
Ps128865	35.2	10.6	Ps000092	O09_800	Ps000092	Ps001408	0.537094	A	B	B	-	B	B	B	A	B	A	A	A	A	B	B	B	B	A	-	A	B	A	A	B	B	A	A	A	A	B	B	-	A	A	B	-	-	B	B	B	B	A
Ps111188	35.2	11.2	Ps000092	O09_800	Ps000092	Ps001408	0.365712	A	B	B	B	B	-	B	A	B	-	B	A	A	B	B	B	B	A	A	A	B	A	A	B	B	A	A	A	A	-	B	B	A	B	B	A	A	B	B	-	B	A
Ps118978	35.2	10.9	Ps000092	O09_800	Ps000092	Ps001408	0.445766	A	B	B	B	B	-	B	A	B	A	-	A	A	B	B	B	B	A	A	A	B	A	-	B	B	A	A	A	A	B	B	B	A	B	B	A	A	B	B	B	B	A
Ps101503	35.2	11.8	Ps000092	O09_800	Ps000092	Ps001408	0.555346	A	B	B	B	B	-	B	A	B	A	A	A	A	B	B	B	B	A	A	A	B	A	A	B	B	A	A	A	A	B	B	B	A	A	B	-	A	B	B	B	B	A
Ps151387	35.2	10	Ps000092	O09_800	Ps000092	Ps001408	0.205903	A	-	B	B	B	B	B	A	B	-	B	A	-	B	B	B	-	A	A	A	B	A	-	-	B	A	A	A	-	B	B	B	A	B	B	A	A	B	B	B	B	A
Ps147028	35.2	10	Ps000092	O09_800	Ps000092	Ps001408	0.527089	A	B	B	B	B	-	-	A	B	-	A	A	-	-	B	B	B	A	A	A	B	A	A	B	B	A	A	A	A	B	B	B	A	-	B	A	A	B	B	B	B	A
Ps111011	35.2	11.2	Ps000092	O09_800	Ps000092	Ps001408	0.546494	A	B	B	B	B	B	B	A	B	A	-	A	A	B	B	B	B	A	A	A	B	A	A	B	B	A	-	A	A	-	B	B	A	-	B	A	A	B	B	B	B	A
Ps104281	35.2	11.5	Ps000092	O09_800	Ps000092	Ps001408	0.654721	A	B	B	B	B	B	B	A	B	A	A	A	-	B	B	B	B	A	A	A	B	A	A	B	B	A	A	A	A	B	B	B	A	A	B	A	A	B	B	B	-	A
Ps133223	35.2	10.6	Ps000092	O09_800	Ps000092	Ps119473	0.757621	A	B	-	B	B	B	B	A	B	A	A	A	A	B	B	B	B	-	A	A	B	A	A	B	B	A	A	A	A	-	B	B	A	-	B	A	A	-	B	B	B	A
Ps144479	35.2	10.3	Ps000092	O09_800	Ps000092	Ps001408	0.43488	A	B	B	B	-	-	B	A	B	A	A	A	-	B	B	B	B	A	A	A	B	A	-	B	B	A	A	A	A	B	B	B	A	A	B	-	A	B	B	B	-	A
Ps131300	35.2	10.6	Ps000092	O09_800	Ps000092	Ps001408	0.757621	A	B	B	B	B	-	B	A	B	A	A	A	A	B	B	B	B	A	A	A	B	A	A	B	B	A	A	A	-	B	-	B	A	-	B	A	A	B	-	B	B	A
Ps132670	35.2	10.6	Ps000092	O09_800	Ps000092	Ps001408	0.537094	A	B	B	B	B	B	B	A	B	A	A	A	A	-	B	B	B	A	-	A	B	A	-	-	B	A	A	A	A	-	B	B	A	-	B	A	A	B	B	B	B	A
Ps142176	35.2	10.3	Ps000092	O09_800	Ps000092	Ps001408	0.43488	A	B	B	B	B	-	-	A	B	A	A	A	A	B	B	B	B	-	A	A	B	A	A	B	B	A	-	A	A	-	B	B	A	-	B	-	A	B	B	B	B	A
Ps111654	35.2	11.2	Ps000092	O09_800	Ps000092	Ps001408	0.365712	A	B	B	B	B	B	B	A	B	A	-	A	A	B	B	B	B	A	A	A	B	A	A	B	B	A	A	A	A	B	B	B	-	B	B	A	A	-	B	B	B	A
Ps130362	35.2	10.6	Ps000092	O09_800	Ps000092	Ps001408	0.537094	A	B	B	B	B	B	B	A	B	A	B	A	A	-	B	-	-	A	A	A	B	A	A	B	B	A	A	A	A	B	B	B	-	B	B	A	A	B	-	B	B	A
Ps137771	35.2	10.3	Ps000092	O09_800	Ps000092	Ps001408	0.875896	A	B	B	B	B	-	B	A	-	A	A	A	A	B	B	B	-	A	A	A	B	A	-	B	B	A	A	A	A	B	B	B	A	-	B	A	A	B	B	B	B	A
Ps123647	35.2	10.9	Ps000092	O09_800	Ps000092	Ps001408	0.445766	A	B	B	B	B	B	B	A	B	A	A	A	A	B	B	B	B	A	A	A	B	A	-	B	B	A	A	A	A	B	-	B	-	A	B	A	-	B	B	B	B	A
Ps132564	35.2	10.6	Ps000092	O09_800	Ps000092	Ps001408	0.354539	A	B	B	B	B	B	B	A	B	A	A	A	A	B	B	B	B	A	A	A	B	A	-	B	B	A	A	A	A	B	B	B	-	-	B	A	A	-	B	-	B	-
Ps106933	35.2	11.2	Ps000092	O09_800	Ps000092	Ps001408	0.2278	A	B	B	B	B	B	B	A	B	A	B	A	A	B	B	B	B	A	A	A	B	-	A	-	B	A	A	A	A	B	B	B	A	B	B	-	A	B	B	B	B	A
Ps152496	35.2	9.7	Ps000092	O09_800	Ps000092	Ps119473	0.630954	-	B	-	B	-	B	B	A	B	A	A	A	A	B	B	B	B	A	A	A	B	-	A	B	B	A	A	A	A	B	B	B	A	-	B	A	A	B	B	-	-	A
Ps123552	35.2	10.9	Ps000092	O09_800	Ps000092	Ps001408	0.647315	A	B	B	B	B	-	B	A	B	-	A	A	A	B	-	B	B	A	A	A	B	A	A	B	B	A	A	A	A	B	B	B	A	A	B	A	A	B	B	B	B	-
Ps153981	35.2	9.7	Ps000092	O09_800	Ps000092	Ps001408	0.87278	A	B	B	B	-	-	-	A	B	A	A	A	A	B	B	B	B	A	A	A	-	-	A	B	B	A	A	A	-	B	B	B	A	-	B	A	A	B	B	-	B	A
Ps151775	35.2	10	Ps000092	O09_800	Ps000092	Ps001408	0.342782	A	B	B	-	B	B	B	A	B	A	A	A	A	B	B	B	B	A	A	A	B	A	A	B	B	-	A	-	A	B	B	B	-	-	B	-	A	B	B	B	B	A
Ps130177	35.2	10.6	Ps000092	O09_800	Ps000092	Ps001408	0.217044	A	B	B	B	B	B	B	A	B	-	-	A	A	B	B	B	B	A	A	A	B	A	-	-	B	A	A	A	A	B	B	B	A	B	B	A	A	B	B	B	-	A
Ps101631	35.2	11.8	Ps000092	O09_800	Ps000092	Ps001408	0.376344	A	B	B	B	B	B	B	A	B	A	A	A	A	B	B	B	B	A	A	A	B	A	A	B	B	A	A	A	A	B	B	B	A	-	B	A	A	B	B	B	B	A
Ps118945	35.2	10.9	Ps000092	O09_800	Ps000092	Ps001408	0.647315	A	B	B	B	B	-	B	A	B	A	A	A	A	B	B	-	B	A	A	A	B	A	A	B	B	A	A	A	A	B	B	B	A	A	B	A	A	B	B	B	B	A
Ps140096	35.2	11.1	Ps000092	O09_800	Ps000092	Ps119473	0.43488	A	-	-	B	-	-	B	A	B	-	B	A	A	B	B	B	B	A	A	A	B	-	A	B	B	A	A	A	A	B	B	B	A	B	B	A	A	B	B	B	B	A
Ps139503	35.2	10.3	Ps000092	O09_800	Ps000092	Ps001408	0.43488	A	-	B	B	B	B	B	A	-	-	B	A	A	B	B	B	B	A	A	A	B	A	A	B	B	A	A	A	-	B	B	B	A	-	B	A	A	B	B	B	B	A
Ps155846	35.2	9.7	Ps000092	O09_800	Ps001374	Ps001408	0.42334	A	B	B	B	B	B	B	A	B	-	B	A	A	B	-	B	A	A	A	-	B	A	A	B	-	A	-	A	A	B	B	B	A	-	B	A	-	B	B	-	-	A
Ps162949	35.2	8.9	Ps000092	O09_800	Ps000092	Ps119473	0.504985	A	B	-	B	B	-	-	A	B	A	A	A	A	B	B	B	-	A	A	A	-	A	A	-	B	-	A	A	A	-	B	B	A	A	B	-	A	-	B	-	B	A
Ps148799	35.3	10	Ps000092	O09_800	Ps000092	Ps001408	0.342782	A	B	B	B	B	-	-	A	B	A	B	A	A	B	B	B	A	-	A	A	B	A	-	B	B	A	A	-	A	B	B	B	A	-	B	A	-	B	B	B	B	A
Ps105242	35.3	11.5	Ps000092	O09_800	Ps000092	Ps001408	0.654721	A	B	B	-	B	B	B	A	B	A	B	A	A	B	B	B	A	A	A	A	B	A	A	B	B	A	A	A	A	B	B	B	A	-	B	A	A	B	B	B	B	A
Ps129656	35.3	10.6	Ps000092	O09_800	Ps000092	Ps001408	0.537094	A	B	B	B	B	-	B	A	-	A	B	A	A	B	B	B	A	A	-	A	B	A	A	B	B	A	A	A	A	B	B	B	A	-	B	A	A	B	B	-	B	A
Ps131100	35.3	10.6	Ps000092	O09_800	Ps000092	Ps001408	0.757621	A	-	B	B	B	B	B	A	B	A	B	A	A	B	B	B	A	A	A	A	B	A	A	B	B	A	A	A	-	B	B	B	A	A	B	A	-	B	B	B	B	A
Ps132187	35.3	10.6	Ps000092	O09_800	Ps000092	Ps001408	0.354539	A	B	B	B	B	B	B	A	B	-	B	A	A	B	B	-	A	A	A	A	B	-	A	B	B	A	A	A	A	B	B	B	A	-	B	A	A	B	B	B	B	A
Ps105549	35.3	11.5	Ps000092	O09_800	Ps000092	Ps001408	0.654721	A	B	B	B	B	B	-	A	B	A	B	A	A	B	B	B	A	A	A	A	B	A	A	B	B	A	A	A	A	B	B	B	A	A	B	A	A	-	B	B	B	A
Ps120902	35.3	10.9	Ps000092	O09_800	Ps000092	Ps001408	0.445766	A	B	B	B	B	A	B	A	B	A	B	A	A	B	B	B	B	A	A	A	B	-	-	B	B	A	A	A	A	B	-	B	A	-	B	A	A	B	B	B	B	A
O09_800	35.7						0.386476	A	B	B	B	B	B	B	A	B	A	B	A	A	B	B	B	B	A	A	A	B	A	A	B	B	A	A	A	A	B	B	B	A	A	B	A	A	B	B	B	B	A
Ps160764	35.7	11.1	O09_800	Ps001408	Ps000092	Ps001408	0.249817	-	B	B	B	B	-	-	A	B	-	B	A	A	B	B	-	-	A	A	A	-	A	A	B	B	A	A	-	-	B	B	B	A	-	B	A	A	B	B	B	B	A
Ps150088	35.7	12	O09_800	Ps001408	Ps001374	Ps001408	0.342782	A	B	B	B	B	B	B	A	B	A	B	-	A	B	B	B	B	A	A	-	B	A	A	B	-	A	A	A	A	-	B	B	A	-	B	-	A	B	B	B	-	A
Ps162201	35.7	11.1	Ps000092	O09_800	Ps000092	Ps119473	0.249817	A	B	-	B	B	B	B	A	B	A	B	A	A	B	B	B	-	A	-	A	B	A	A	B	-	A	A	A	-	B	B	B	A	-	B	A	-	-	B	B	B	A
Ps142980	35.7	12.3	O09_800	Ps001408	Ps000092	Ps001408	0.43488	A	B	B	B	B	B	B	-	B	A	B	A	A	B	B	B	-	A	A	A	B	A	A	B	B	A	A	A	A	B	B	B	A	-	B	-	A	-	-	-	B	A
Ps148863	35.7	12	O09_800	Ps001408	Ps000092	Ps001408	0.205903	A	B	B	B	B	-	B	A	B	A	B	A	A	B	B	B	-	-	A	A	B	A	A	B	B	A	A	A	A	B	B	B	-	-	B	-	A	B	B	B	B	-
Ps117527	35.7	12.9	O09_800	Ps001408	Ps000092	Ps001408	0.647315	A	B	B	B	B	B	B	A	B	A	-	A	A	B	B	-	B	A	A	A	B	A	A	B	B	A	A	A	A	B	B	B	A	-	B	A	A	B	B	-	B	A
Ps163669	35.7	10.5	Ps000092	O09_800	Ps000092	Ps001408	0.0629791	A	B	B	B	B	-	B	-	B	-	B	A	-	B	B	B	-	A	A	A	B	A	A	B	-	A	A	-	-	B	B	B	-	-	B	A	A	B	B	B	B	A
Ps127581	35.7	12.6	O09_800	Ps001408	Ps000092	Ps001408	0.757621	A	-	B	B	B	-	B	A	B	A	-	A	A	-	-	B	B	A	A	A	B	A	A	B	B	A	A	A	A	B	B	B	A	-	B	A	A	B	B	B	B	A
Ps159739	35.7	11.4	Ps000092	O09_800	Ps000092	Ps119473	0.745603	A	B	-	B	B	-	B	A	B	-	-	A	A	B	B	B	B	-	A	A	B	A	A	-	B	A	A	A	A	B	-	B	A	-	B	A	A	B	B	B	B	A
Ps156124	35.7	11.7	Ps000092	O09_800	Ps000092	Ps119473	0.262332	A	B	-	B	B	B	B	A	B	A	B	A	A	B	-	B	B	A	A	A	B	-	A	B	B	-	A	A	-	B	B	B	A	-	B	-	A	B	-	B	B	A
Ps138854	35.7	12.3	Ps000092	O09_800	Ps000092	Ps119473	0.639412	A	B	-	B	B	B	B	A	B	A	-	A	A	B	B	B	-	A	A	A	-	A	A	B	B	A	A	A	A	B	B	B	A	-	B	A	A	B	-	B	B	A
Ps114389	35.7	12.9	O09_800	Ps001408	Ps000092	Ps001408	0.647315	A	B	B	B	B	-	B	A	B	A	-	A	A	B	B	B	-	-	A	A	B	A	A	B	B	A	A	A	A	B	B	B	A	A	B	A	A	B	B	B	B	A
Ps127443	35.7	12.6	Ps000092	O09_800	Ps000092	Ps001408	0.757621	A	B	B	B	B	B	B	A	B	A	-	A	A	B	B	B	-	A	A	-	B	A	A	-	-	A	A	A	A	B	-	B	A	A	B	A	A	B	B	B	B	A
Ps114410	35.7	12.9	Ps000092	O09_800	Ps000092	Ps001408	0.285751	A	B	B	B	B	B	B	A	B	A	-	-	A	B	B	B	B	A	-	A	B	A	A	B	B	A	A	A	A	B	B	B	A	A	B	-	A	B	B	B	B	A
Ps151913	35.7	12	Ps000092	O09_800	Ps000092	Ps119473	0.75183	A	B	-	B	B	-	B	A	B	A	B	A	A	B	B	-	-	A	A	A	B	A	A	B	B	A	A	A	A	B	B	B	A	-	B	-	A	-	-	B	B	A
Ps144161	35.7	12.3	O09_800	Ps001408	Ps000092	Ps001408	0.43488	A	B	B	B	B	B	B	A	B	A	B	A	-	-	B	B	-	A	A	A	B	A	-	-	B	A	A	A	A	B	B	B	A	A	-	A	-	B	B	B	B	A
Ps118360	35.7	12.9	O09_800	Ps001408	Ps000092	Ps001408	0.647315	A	-	B	B	B	B	B	A	-	A	-	A	A	B	B	B	B	-	A	A	B	A	A	B	B	A	A	A	A	B	B	B	A	A	B	A	A	B	B	-	B	A
Ps113433	35.7	13.2	O09_800	Ps001408	Ps000092	Ps001408	0.546494	A	B	B	B	B	-	B	A	B	A	-	A	A	B	B	B	B	A	A	A	B	A	A	B	B	A	A	A	A	B	B	B	A	-	B	A	A	B	B	B	B	A
Ps139317	35.7	12.3	O09_800	Ps001408	Ps000092	Ps001408	0.43488	A	-	B	B	B	B	B	A	B	A	-	A	A	B	B	B	B	A	A	A	B	A	A	B	B	A	A	A	A	-	B	B	A	-	B	-	-	B	B	B	B	A
Ps144953	35.7	12	Ps000092	O09_800	Ps000092	Ps001408	0.527089	A	B	B	B	-	-	B	A	B	A	-	-	A	B	B	B	B	A	A	-	B	A	A	B	B	A	A	-	A	B	B	B	A	A	B	A	A	B	B	-	B	A
Ps139033	35.7	12.3	O09_800	Ps001408	Ps000092	Ps001408	0.274299	A	B	B	B	B	B	B	-	B	A	B	A	A	B	B	B	B	A	A	A	B	A	A	B	B	A	A	-	-	B	B	B	A	-	B	A	A	-	B	B	B	A
Ps163569	35.7	10.5	O09_800	Ps001408	Ps001374	Ps001408	0.398025	A	B	B	B	B	-	B	A	B	A	B	-	A	B	B	B	-	A	A	-	B	A	A	B	-	-	A	A	A	-	B	B	A	-	B	-	-	B	B	B	-	A
Ps161722	35.7	11.1	Ps000092	O09_800	Ps000092	Ps001408	0.621873	A	B	B	B	-	-	B	A	B	A	-	A	A	B	B	B	B	A	A	A	B	A	A	B	-	A	A	A	A	B	B	-	A	-	B	A	A	-	B	-	-	A
Ps155340	35.7	11.7	O09_800	Ps001408	Ps000092	Ps001408	0.630954	A	B	B	-	B	B	B	A	B	A	B	A	A	B	B	B	B	A	A	A	B	A	-	B	B	A	A	A	-	B	-	B	A	-	B	A	A	B	-	B	-	A
Ps163173	35.7	10.8	O09_800	Ps001408	Ps001374	Ps001408	0.504985	A	B	B	B	B	-	B	A	B	A	-	-	A	B	-	B	B	A	A	-	B	A	-	B	-	A	A	A	A	B	B	B	A	-	B	-	A	-	B	B	-	A
Ps140065	35.7	12.3	O09_800	Ps001408	Ps000092	Ps001408	0.274299	A	B	B	B	B	B	B	A	B	A	B	A	A	B	B	B	B	A	A	A	B	A	-	-	B	A	-	-	A	-	B	B	-	A	B	A	A	B	B	-	B	A
Ps134915	35.7	12.6	Ps000092	O09_800	Ps000092	Ps001408	0.354539	A	B	B	B	B	-	B	A	-	A	B	A	A	B	B	B	B	-	A	-	B	A	A	B	-	A	A	A	A	B	B	B	A	A	B	A	A	B	B	B	B	A
Ps147902	35.7	12	Ps000092	O09_800	Ps000092	Ps119473	0.527089	A	B	-	B	B	-	B	A	B	A	-	A	A	-	B	B	B	A	A	-	B	A	A	B	B	A	A	A	A	B	B	B	A	-	B	A	A	B	B	B	B	A
Ps101266	35.7	13.8	O09_800	Ps001408	Ps000092	Ps001408	0.238185	A	B	B	B	B	B	B	A	B	A	B	A	A	B	B	B	B	A	A	A	B	A	A	B	B	A	A	A	A	B	B	B	A	-	B	-	A	B	B	B	B	A
Ps136475	35.7	12.3	O09_800	Ps001408	Ps000092	Ps001408	0.274299	-	-	B	B	B	-	B	A	B	A	B	A	A	B	B	B	B	A	A	A	B	A	A	B	B	A	A	-	A	B	B	B	A	A	B	-	A	B	B	B	B	A
Ps137423	35.7	12.3	Ps000092	O09_800	Ps000092	Ps119473	0.639412	-	B	-	B	B	-	-	A	B	A	-	A	A	B	B	B	-	A	A	A	B	A	A	B	B	A	A	A	A	B	B	B	A	A	B	A	-	B	B	B	B	A
Ps116514	35.7	12.9	Ps000092	O09_800	Ps000092	Ps001408	0.169912	A	B	B	B	B	B	B	A	B	A	B	-	A	B	B	-	B	A	A	A	B	A	-	B	B	A	A	A	-	B	B	B	A	-	B	A	A	B	B	B	B	A
Ps146113	35.7	12	O09_800	Ps001408	Ps000092	Ps001408	0.342782	A	B	B	B	B	B	B	A	B	A	B	A	A	B	B	-	-	A	A	A	B	A	A	B	B	A	A	A	-	B	B	B	-	A	B	-	A	B	B	-	B	A
Ps139821	35.7	12.3	O09_800	Ps001408	Ps000092	Ps001408	0.639412	A	B	B	B	B	-	B	A	-	A	B	A	A	B	B	B	-	A	-	A	B	A	A	B	B	-	A	A	A	B	B	B	A	A	B	A	A	B	B	B	B	A
Ps152586	35.7	11.7	Ps000092	O09_800	Ps000092	Ps001447	0.42334	A	B	-	B	B	-	B	A	B	A	B	A	A	B	B	B	-	A	A	-	B	A	A	B	B	-	A	A	A	B	-	B	-	A	B	-	A	B	B	B	-	A
Ps105183	35.7	13.5	O09_800	Ps001408	Ps000092	Ps001408	0.456057	A	B	B	B	B	-	B	A	B	A	B	A	A	B	B	B	B	A	A	A	B	A	A	B	B	A	A	A	A	B	B	B	A	-	B	A	A	B	B	B	B	A
Ps126423	35.7	12.6	O09_800	Ps001408	Ps000092	Ps001408	0.537094	-	B	B	B	B	-	B	A	B	A	B	A	A	B	B	B	-	A	A	A	B	A	A	B	B	A	A	A	A	-	B	B	A	A	B	A	A	B	B	-	B	A
Ps158735	35.7	11.4	O09_800	Ps001408	Ps000092	Ps001408	0.194366	-	B	B	B	B	B	B	-	B	A	B	A	A	B	B	B	B	A	A	A	B	-	A	B	B	A	A	A	A	B	B	B	A	-	B	-	A	B	-	-	-	A
Ps163337	35.7	10.8	O09_800	Ps001408	Ps000092	Ps001408	0.504985	A	B	B	-	B	B	B	A	B	A	B	A	-	B	B	B	-	A	-	A	B	A	A	B	B	A	A	A	A	-	B	-	-	A	B	A	A	B	B	B	B	-
Ps133661	35.7	12.6	Ps000092	O09_800	Ps000092	Ps001408	0.354539	A	B	B	B	-	B	B	A	B	A	B	-	A	B	B	B	-	-	A	A	B	A	A	B	B	A	A	A	A	B	B	B	A	-	B	A	A	B	B	B	B	A
Ps142044	35.7	12.3	O09_800	Ps001408	Ps000092	Ps001408	0.43488	A	B	B	B	B	B	B	A	B	A	-	A	A	-	B	B	-	A	A	-	B	A	-	B	B	A	A	A	A	B	B	B	A	A	B	-	A	B	B	B	B	A
Ps151534	35.7	12	Ps000092	O09_800	Ps000092	Ps001447	0.342782	A	B	-	B	B	-	B	A	B	A	-	A	A	B	B	B	-	A	A	-	B	A	A	B	B	-	A	A	A	B	B	B	-	-	B	A	A	B	B	B	B	A
Ps115979	35.7	12.9	O09_800	Ps001408	Ps000092	Ps001408	0.647315	A	B	B	B	B	-	B	A	B	A	-	A	A	B	B	B	-	A	A	A	B	A	A	B	B	A	A	A	A	-	B	B	A	-	B	A	A	B	B	B	B	A
Ps155763	35.7	11.7	Ps000092	O09_800	Ps000092	Ps001408	0.630954	A	-	B	B	B	B	B	-	B	A	B	A	A	B	B	B	B	A	A	A	B	A	-	-	-	A	A	A	A	-	B	B	A	-	B	A	A	B	-	B	-	A
Ps147550	35.7	12	Ps000092	O09_800	Ps000092	Ps119473	0.342782	A	B	-	B	B	B	B	A	B	A	B	A	A	B	B	B	B	A	A	-	B	A	A	B	B	A	-	A	A	-	B	B	A	-	-	A	A	-	B	B	B	A
Ps136641	35.7	12.3	O09_800	Ps001408	Ps000092	Ps001408	0.43488	A	B	B	B	B	B	B	A	B	A	-	A	-	B	B	B	-	A	A	A	-	A	A	B	B	-	A	A	-	B	B	B	A	A	B	A	A	B	B	B	B	A
Ps126989	35.7	12.6	O09_800	Ps001408	Ps000092	Ps001408	0.217044	A	-	B	B	B	B	B	A	B	A	B	A	A	B	B	B	-	A	A	-	B	A	A	B	B	A	A	A	A	B	B	B	A	-	B	A	A	B	B	B	B	-
Ps128628	35.7	12.6	O09_800	Ps001408	Ps000092	Ps001408	0.354539	A	B	B	B	B	B	B	A	B	A	B	A	A	-	B	B	-	A	A	A	B	A	-	B	B	A	A	A	A	B	B	B	A	-	B	A	A	B	-	B	B	A
Ps112532	35.7	13.2	O09_800	Ps001408	Ps000092	Ps001408	0.546494	A	B	B	B	B	B	B	A	B	A	-	A	A	B	B	B	B	A	A	A	B	A	A	B	B	A	A	A	A	B	B	B	A	-	B	A	A	B	B	B	-	A
Ps133411	35.7	12.6	O09_800	Ps001408	Ps000092	Ps001408	0.537094	A	B	B	B	B	B	B	A	B	A	-	A	A	B	B	-	B	A	-	A	B	A	A	B	B	A	A	A	A	B	B	B	A	-	B	A	A	B	B	-	B	A
Ps138269	35.7	12.3	Ps000092	O09_800	Ps000092	Ps001408	0.274299	A	B	B	B	B	B	B	A	B	A	-	-	A	B	-	B	B	A	-	A	B	A	-	B	B	A	A	A	A	B	B	B	A	A	B	A	A	B	B	B	B	A
Ps158617	35.7	11.4	O09_800	Ps001408	Ps000092	Ps001408	1	A	B	B	B	B	-	B	A	-	A	B	A	A	-	B	B	-	A	A	A	B	A	A	B	B	A	A	A	A	-	-	B	-	-	B	A	A	B	B	B	-	A
Ps127183	35.7	12.6	O09_800	Ps001408	Ps000092	Ps001408	0.757621	A	B	B	-	B	B	B	A	B	A	B	A	A	B	-	B	B	A	A	A	B	A	A	B	B	A	A	-	A	B	-	B	A	A	B	A	A	B	B	B	-	A
Ps154501	35.7	11.7	O09_800	Ps001408	Ps000092	Ps001408	0.262332	-	B	B	B	B	B	B	A	B	A	-	A	-	B	B	B	B	A	A	-	B	A	A	B	B	A	A	A	-	B	-	B	A	-	B	A	A	B	B	B	B	A
Ps121623	35.7	12.9	O09_800	Ps001408	Ps000092	Ps001408	0.445766	A	B	B	-	B	B	B	A	B	A	-	A	A	B	B	B	B	A	A	A	B	A	-	B	B	A	A	A	A	B	B	B	A	-	B	A	A	B	B	B	B	A
Ps137391	35.7	12.3	O09_800	Ps001408	Ps000092	Ps001408	0.43488	A	B	B	B	B	B	B	A	B	A	-	A	A	B	B	B	B	A	A	-	-	A	A	B	B	-	A	A	A	-	B	B	A	-	B	A	A	B	-	B	B	A
Ps133944	35.7	12.6	Ps000092	O09_800	Ps000092	Ps001408	0.537094	A	B	B	B	B	B	B	A	B	A	B	A	A	B	B	B	B	A	A	A	B	A	A	B	-	A	A	A	-	B	B	B	A	A	B	-	A	-	B	-	B	A
Ps144036	35.7	12.3	Ps000092	O09_800	Ps000092	Ps119473	0.43488	A	B	-	B	B	-	B	A	B	A	B	A	A	B	B	B	-	A	A	A	B	A	-	B	B	A	A	-	A	B	B	B	A	-	B	A	A	B	-	B	B	A
Ps137066	35.7	12.3	O09_800	Ps001408	Ps000092	Ps001408	0.43488	A	B	B	B	B	B	B	A	B	A	-	A	A	B	B	-	B	A	A	A	B	A	A	B	B	-	A	-	-	B	-	B	A	A	B	A	A	B	B	B	B	A
Ps123794	35.7	12.9	Ps000092	O09_800	Ps000092	Ps001408	0.285751	A	B	B	B	B	B	B	A	B	A	B	-	A	B	B	B	B	A	A	A	B	-	A	-	B	A	A	A	A	B	B	B	A	-	B	A	A	B	-	B	B	A
Ps163694	35.7	10.5	O09_800	Ps001408	Ps000092	Ps001408	0.236724	A	B	B	B	B	B	B	A	B	-	B	A	-	B	-	B	-	A	A	A	-	-	-	B	B	A	A	A	A	B	B	B	A	-	B	-	A	B	B	B	B	A
Ps127627	35.7	12.6	O09_800	Ps001408	Ps000092	Ps001408	0.354539	A	-	B	B	B	B	B	A	B	A	-	A	A	B	B	B	B	A	A	-	B	A	A	B	B	A	A	A	A	B	B	B	A	-	B	A	A	B	B	B	B	A
Ps151589	35.7	12	Ps000092	O09_800	Ps000092	Ps119473	0.527089	A	B	-	B	-	-	B	A	B	-	B	A	A	B	B	B	-	A	A	A	B	A	A	B	B	A	A	A	A	B	B	B	A	-	B	A	-	B	B	B	B	A
Ps162183	35.7	11.1	O09_800	Ps001408	Ps000092	Ps001408	0.869417	A	B	B	B	-	-	B	A	B	A	B	A	A	B	B	-	-	A	A	A	B	A	-	B	B	A	A	A	A	-	-	-	A	A	B	A	A	B	-	B	-	A
Ps140888	35.7	12.3	O09_800	Ps001408	Ps000092	Ps001408	0.43488	A	B	B	B	B	B	B	A	B	A	B	A	A	B	B	-	-	A	A	A	B	-	A	B	B	A	A	A	-	B	B	B	A	-	B	A	A	-	B	B	B	A
Ps149026	35.7	12	Ps000092	O09_800	Ps000092	Ps001408	0.205903	A	-	B	B	B	B	B	A	B	A	B	-	A	B	B	B	B	A	A	-	B	A	A	B	B	A	A	A	A	B	B	B	A	-	B	-	A	B	B	-	B	A
Ps112411	35.7	13.2	Ps000092	O09_800	Ps000092	Ps119473	0.763025	A	B	-	-	B	B	B	A	B	A	-	A	A	B	B	B	B	A	A	A	B	A	A	B	B	A	A	A	A	B	B	B	A	A	B	A	A	B	-	B	B	A
Ps116482	35.7	12.9	Ps000092	O09_800	Ps000092	Ps001408	0.647315	A	B	B	B	B	B	B	A	B	A	B	A	A	B	B	B	-	A	A	A	B	A	A	B	-	A	A	A	A	-	B	B	A	-	B	A	A	B	-	B	B	A
Ps142123	35.7	12.3	O09_800	Ps001408	Ps000092	Ps001408	0.274299	A	B	B	B	B	B	B	-	B	A	-	A	A	B	B	B	B	-	A	A	B	A	A	B	B	A	A	A	A	B	B	B	A	-	B	-	A	B	B	B	-	A
Ps160191	35.7	11.4	O09_800	Ps001408	Ps000092	Ps001408	0.745603	A	B	B	-	B	-	B	A	-	A	B	A	A	B	-	B	-	A	A	A	B	-	A	B	B	A	A	-	A	B	B	B	A	-	B	A	A	B	B	B	-	A
Ps151439	35.7	12	O09_800	Ps001408	Ps000092	Ps001408	1	A	B	B	-	-	B	B	A	-	A	-	A	A	-	-	B	B	A	A	A	B	A	A	B	B	A	A	A	A	B	B	B	A	-	B	A	A	B	B	-	B	A
Ps163729	35.7	10.2	Ps000092	O09_800	Ps000092	Ps001408	0.731601	A	B	B	B	B	-	B	A	B	A	-	A	A	B	B	B	-	-	A	A	-	A	A	B	-	A	A	-	-	-	-	B	A	-	B	A	A	B	B	B	-	A
Ps126710	35.7	12.6	Ps000092	O09_800	Ps000092	Ps001408	0.537094	A	B	B	B	B	-	B	A	B	A	-	-	A	B	B	B	B	A	A	A	B	A	A	-	B	A	A	A	A	B	B	B	A	A	B	A	A	B	B	-	B	A
Ps129100	35.7	12.6	O09_800	Ps001408	Ps000092	Ps001408	0.757621	A	B	B	B	B	B	B	A	B	A	-	A	A	B	B	B	B	A	A	A	B	A	A	B	B	A	A	A	A	B	B	B	A	-	-	A	A	-	-	B	B	A
Ps163223	35.7	10.8	O09_800	Ps001408	Ps000092	Ps001408	0.317311	-	-	B	B	B	B	B	A	-	A	-	A	A	B	B	B	B	A	A	A	B	-	-	B	B	A	A	-	A	B	-	-	A	-	B	A	-	B	B	B	B	A
Ps131234	35.7	12.6	O09_800	Ps001408	Ps000092	Ps001408	0.354539	A	B	B	B	B	B	B	A	B	A	B	A	A	B	B	B	-	A	A	A	B	-	A	B	B	A	A	-	A	-	B	B	-	A	B	A	A	B	B	B	B	A
Ps143835	35.7	12.3	Ps000092	O09_800	Ps000092	Ps119473	0.639412	A	-	-	B	B	-	B	A	B	A	B	A	A	B	B	B	-	A	A	A	B	A	A	B	-	-	A	A	A	B	B	B	A	-	B	A	A	B	B	B	B	A
Ps156595	35.7	11.7	O09_800	Ps001408	Ps001374	Ps001408	0.42334	-	B	B	B	B	B	B	A	B	-	-	-	A	-	B	B	B	A	A	A	B	A	A	B	-	-	A	A	A	B	B	B	A	A	-	A	A	B	B	B	B	A
Ps106636	35.7	13.5	O09_800	Ps001408	Ps000092	Ps001408	0.456057	A	B	B	B	B	B	B	A	B	A	-	A	A	B	B	B	B	A	A	A	B	A	A	B	B	A	A	A	A	B	B	B	A	-	B	A	A	B	B	B	B	A
Ps160591	35.7	11.1	O09_800	Ps001408	Ps000092	Ps001408	0.41108	A	B	B	B	B	-	B	A	B	A	-	A	-	-	B	B	-	A	A	A	B	A	A	-	B	A	A	A	A	B	B	B	A	-	B	-	-	B	B	B	B	A
Ps157064	35.7	11.7	O09_800	Ps001408	Ps000092	Ps001408	0.149541	A	B	B	B	B	-	B	A	B	-	-	A	A	B	B	B	B	A	A	A	B	A	-	B	B	A	A	A	A	B	B	B	-	A	B	-	-	B	B	B	B	A
Ps136507	35.7	12.3	O09_800	Ps001408	Ps000092	Ps001408	0.639412	A	-	B	B	B	B	B	-	B	A	B	A	A	-	B	B	-	A	A	A	B	A	A	B	B	A	A	A	A	B	B	B	A	-	-	A	A	B	B	B	B	A
Ps142603	35.7	12.3	O09_800	Ps001408	Ps000092	Ps001408	0.43488	A	B	B	B	B	-	B	A	B	A	-	A	A	B	B	B	B	A	A	A	B	A	-	B	B	A	A	A	A	B	B	B	A	-	B	A	-	B	-	B	B	A
Ps153779	35.7	11.7	O09_800	Ps001408	Ps000092	Ps001408	0.0781691	A	B	B	B	B	-	B	A	B	-	B	A	A	B	B	B	-	A	A	A	B	A	-	B	B	A	A	-	-	B	B	B	A	-	B	A	A	B	B	B	B	A
Ps112048	35.7	13.2	O09_800	Ps001408	Ps000092	Ps001408	0.365712	A	B	B	B	B	B	B	A	B	A	-	A	A	B	B	B	B	A	A	-	B	A	A	B	B	-	A	A	A	B	B	B	A	A	B	A	A	B	B	-	B	A
Ps139302	35.7	12.3	Ps000092	O09_800	Ps000092	Ps119473	0.639412	A	B	-	B	B	B	B	A	B	-	-	A	A	-	B	B	B	A	A	A	B	A	A	B	B	A	A	A	A	-	B	B	A	-	B	A	A	B	B	B	B	A
Ps149202	35.7	12	Ps000092	O09_800	Ps000092	Ps001408	0.205903	A	B	B	B	B	B	B	A	B	A	-	-	A	B	B	B	B	A	A	A	B	A	A	B	B	A	A	A	-	B	B	B	A	-	B	-	A	B	B	B	B	-
Ps110405	35.7	13.2	O09_800	Ps001408	Ps000092	Ps001408	0.2278	A	B	B	B	B	B	B	A	B	-	B	A	A	B	B	B	B	A	A	A	B	A	A	B	B	A	A	A	A	B	B	B	A	-	B	-	A	B	-	B	B	A
Ps144536	35.7	12.3	Ps000092	O09_800	Ps000092	Ps001408	0.639412	A	B	B	B	B	-	B	A	B	A	B	A	A	B	B	B	-	A	A	-	B	A	A	-	-	A	A	A	-	B	B	B	A	A	B	A	A	B	B	B	B	A
Ps142588	35.7	12.3	O09_800	Ps001408	Ps000092	Ps001408	0.274299	A	B	B	B	B	B	B	A	B	A	B	A	A	B	-	B	-	A	A	A	B	-	-	-	B	A	A	A	A	B	B	B	A	-	B	A	A	B	B	B	B	A
Ps152058	35.7	12	Ps000092	O09_800	Ps000092	Ps119473	0.527089	A	B	-	B	B	-	B	A	B	A	B	A	-	B	B	B	-	A	A	-	B	A	A	B	B	A	A	A	A	B	B	B	A	-	B	A	A	B	B	B	-	A
Ps113600	35.7	13.2	O09_800	Ps001408	Ps000092	Ps001408	0.546494	A	B	B	B	B	-	B	A	B	A	-	A	A	B	B	B	B	A	A	A	B	A	A	B	B	A	A	A	A	B	B	B	A	-	B	A	A	B	B	B	B	A
Ps131914	35.7	12.6	O09_800	Ps001408	Ps000092	Ps001408	0.537094	A	B	B	B	B	-	B	A	B	A	-	A	A	B	B	B	B	A	A	A	B	A	A	B	B	A	A	A	A	B	B	B	-	A	-	-	A	B	B	B	B	A
Ps151085	35.7	12	O09_800	Ps001408	Ps000092	Ps001408	0.342782	A	B	B	B	B	-	B	A	B	A	B	A	A	B	B	B	-	A	A	-	B	A	A	B	B	A	-	A	A	B	-	B	A	-	-	A	A	B	B	B	B	A
Ps158991	35.7	11.4	O09_800	Ps001408	Ps000092	Ps001408	1	A	B	B	B	B	B	B	A	B	-	-	A	A	B	B	B	B	A	A	A	B	A	A	-	B	A	A	A	A	B	-	B	-	A	-	A	A	B	B	-	-	A
Ps148967	35.7	12	O09_800	Ps001408	Ps000092	Ps001408	0.75183	A	B	B	B	B	B	B	A	B	A	B	A	A	B	B	B	-	A	A	A	-	A	A	B	B	A	A	A	-	B	B	-	A	-	-	A	A	B	B	B	B	A
Ps163073	35.7	10.8	Ps000092	O09_800	Ps000092	Ps119473	0.317311	A	B	-	B	B	B	B	A	B	A	B	A	A	B	B	-	-	A	-	A	B	A	A	B	B	A	A	-	A	B	B	B	A	-	B	-	-	B	-	-	B	-
Ps147332	35.7	12	O09_800	Ps001408	Ps000092	Ps001408	0.205903	A	-	B	B	B	B	B	A	B	-	B	A	-	B	B	B	-	-	A	A	B	A	A	B	B	A	A	-	A	B	B	B	A	-	B	A	A	B	B	B	B	A
Ps137485	35.7	12.3	Ps000092	O09_800	Ps000092	Ps001408	0.43488	A	B	B	B	B	B	B	A	B	A	-	A	A	B	B	B	B	A	A	A	B	-	A	B	-	A	A	A	A	-	B	B	A	-	B	A	A	B	B	B	B	A
Ps155200	35.7	11.7	Ps000092	O09_800	Ps000092	Ps119473	0.87278	A	B	-	B	-	-	B	-	B	A	B	A	A	B	-	-	-	A	A	A	B	A	A	B	B	A	A	A	A	B	B	B	A	A	-	A	A	B	B	B	B	A
Ps143596	35.7	12.3	O09_800	Ps001408	Ps000092	Ps001408	0.639412	A	B	B	B	B	B	B	A	B	A	B	A	A	B	B	B	-	A	A	A	-	A	-	B	B	-	A	A	A	B	-	-	A	A	B	A	A	B	B	B	B	A
Ps147662	35.7	12	Ps000092	O09_800	Ps000092	Ps001408	0.113846	A	B	B	B	B	B	B	A	B	A	B	-	A	-	B	B	B	A	-	-	B	-	A	B	B	A	A	A	A	B	B	B	A	-	B	A	A	B	B	B	B	-
Ps106369	35.7	13.5	O09_800	Ps001408	Ps000092	Ps001408	0.456057	A	B	B	B	B	B	-	A	B	A	B	A	A	B	B	B	-	A	A	-	B	A	A	B	B	A	A	A	A	B	B	B	A	A	B	A	A	B	B	B	B	A
Ps001408	36.6						0.763025	A	B	A	B	B	B	B	A	B	A	B	A	A	B	B	B	-	A	A	A	B	A	A	B	-	A	A	A	A	B	B	B	A	-	B	A	A	B	B	B	B	A
Ps001507	36.6	25.9	Ps001408	Ps119473	O09_800	Ps119473	0.654721	A	B	A	B	B	B	B	A	B	A	B	A	A	B	B	B	-	A	A	A	B	A	A	B	B	A	A	A	A	B	B	B	A	-	B	A	A	B	B	B	B	A
Ps147607	36.6	11.4	O09_800	Ps001408	O09_800	Ps119473	0.75183	A	B	A	B	-	-	B	A	B	A	B	A	A	B	B	B	-	A	A	A	B	A	A	B	B	A	A	A	-	B	B	B	A	A	-	-	A	B	B	B	B	A
Ps161640	36.6	10.2	O09_800	Ps001408	O09_800	Ps119473	0.41108	-	B	A	B	B	-	-	A	B	A	B	-	A	B	-	B	B	A	A	-	B	A	-	B	B	A	A	-	A	B	B	B	A	-	B	A	A	B	-	B	-	A
Ps107326	36.6	12	O09_800	Ps001408	O09_800	Ps119473	0.546494	A	B	A	B	B	B	B	A	B	A	B	A	A	B	-	B	B	A	A	A	B	-	A	B	B	A	A	-	A	B	B	B	A	A	B	A	A	B	B	-	B	A
Ps149652	36.6	11.4	O09_800	Ps001408	O09_800	Ps119473	0.527089	A	B	A	B	B	-	B	A	B	A	B	A	A	B	B	B	-	A	-	-	B	A	A	B	B	A	A	A	A	-	B	B	A	-	B	A	A	B	B	B	B	A
Ps112657	36.6	12.6	O09_800	Ps001408	O09_800	Ps119473	0.763025	A	-	A	B	B	B	B	A	B	A	B	A	A	B	B	B	B	A	A	A	B	A	A	B	B	A	A	A	A	B	-	B	A	-	B	A	A	B	B	B	B	A
Ps129393	36.6	12.3	O09_800	Ps001408	O09_800	Ps001447	0.757621	A	B	A	B	B	B	B	A	B	A	-	A	A	B	B	B	-	A	A	A	B	A	A	B	-	A	A	A	A	B	B	B	-	A	B	A	A	B	B	B	B	A
Ps107665	36.6	12	O09_800	Ps001408	O09_800	Ps119473	0.546494	A	B	A	B	B	-	B	A	B	A	B	A	A	B	-	B	B	-	A	A	B	A	A	B	B	A	A	A	-	B	B	B	A	A	B	A	A	B	B	B	B	A
Ps129296	36.6	12.6	O09_800	Ps001408	O09_800	Ps119473	0.757621	A	B	A	B	B	B	B	-	B	A	B	A	A	B	B	B	-	A	A	A	B	A	A	B	-	A	A	A	A	-	B	B	A	-	B	A	A	B	B	B	B	A
Ps143207	36.6	11.4	O09_800	Ps001408	O09_800	Ps119473	0.639412	A	B	A	-	B	-	B	A	B	A	B	A	A	-	B	B	B	A	A	A	B	A	A	B	B	A	A	A	A	B	B	B	A	A	B	A	A	B	-	-	B	A
Ps158661	36.6	10.8	O09_800	Ps001408	Ps001374	Ps001447	0.516412	A	B	A	B	B	B	B	-	B	A	B	A	A	B	B	B	A	A	A	A	B	-	A	-	-	A	A	A	A	B	B	B	A	B	-	-	-	B	B	B	-	A
Ps149166	36.6	11.4	O09_800	Ps001408	O09_800	Ps119473	0.527089	A	B	A	B	B	B	B	A	B	A	B	A	A	B	B	B	-	A	A	A	B	A	A	B	B	A	A	-	A	-	B	B	A	-	B	A	A	-	B	B	-	A
Ps139425	36.6	12	O09_800	Ps001408	O09_800	Ps119473	0.875896	A	B	A	B	B	-	-	A	B	A	-	A	A	B	B	B	-	A	A	A	B	-	A	B	-	A	A	A	A	B	B	B	A	-	B	A	A	B	B	B	B	A
Ps163446	36.6	10.5	O09_800	Ps001408	O09_800	Ps119473	0.61209	A	B	A	B	B	B	B	A	B	-	B	A	A	B	B	B	-	-	A	A	B	-	A	B	-	-	A	A	A	B	B	B	A	-	-	A	A	B	-	B	B	A
Ps109873	36.6	12	O09_800	Ps001408	Ps000092	Ps001447	0.2278	A	B	A	B	B	B	B	A	B	-	B	A	A	B	B	B	A	A	-	A	B	A	A	B	B	A	A	A	-	B	B	B	A	B	B	A	-	B	B	B	B	A
Ps123571	36.6	12.6	O09_800	Ps001408	O09_800	Ps119473	0.878794	A	B	A	B	B	-	B	A	B	A	B	A	A	B	B	-	-	A	A	A	B	A	A	B	B	A	A	A	A	B	B	B	A	-	B	A	A	B	B	B	B	A
Ps163711	36.6	9.9	O09_800	Ps001408	O09_800	Ps001447	0.865772	A	B	A	B	B	-	-	A	-	A	B	-	A	B	B	B	-	A	A	A	B	-	A	B	B	A	A	A	A	-	-	B	-	-	B	A	A	B	B	-	B	A
Ps144418	36.6	11.4	O09_800	Ps001408	Ps000092	Ps119473	0.43488	A	B	A	B	B	B	B	A	B	A	B	A	A	B	B	B	-	A	-	A	B	A	-	B	B	A	A	A	A	B	B	B	A	B	-	A	A	-	B	B	-	-
Ps130934	36.6	12	O09_800	Ps001408	O09_800	Ps119473	1	A	B	A	-	-	B	B	A	-	A	B	A	A	B	B	B	B	A	A	A	-	A	A	B	B	A	A	A	A	B	B	B	A	-	B	A	A	B	B	B	B	A
Ps117406	36.6	12.3	O09_800	Ps001408	O09_800	Ps001447	0.445766	A	B	A	B	B	B	B	A	B	A	B	A	A	B	B	B	-	A	A	-	B	A	A	B	B	A	A	A	A	B	B	B	-	-	B	A	A	B	B	B	-	A
Ps135239	36.6	11.7	O09_800	Ps001408	O09_800	Ps001447	0.43488	A	B	A	B	B	B	B	A	B	A	B	A	-	B	B	B	-	A	A	A	B	A	A	B	B	A	A	A	A	-	B	B	-	-	B	A	A	B	-	B	B	A
Ps136326	36.6	11.1	O09_800	Ps001408	O09_800	Ps119473	0.43488	A	B	A	B	B	B	B	A	B	A	B	A	-	B	-	B	B	-	A	A	B	A	A	-	B	-	A	-	A	B	B	B	A	A	B	A	A	B	B	B	B	A
Ps143569	36.6	12	O09_800	Ps001408	O09_800	Ps119473	0.875896	A	B	A	B	B	B	B	A	-	A	-	A	A	B	B	B	-	A	A	A	B	A	A	B	B	A	-	A	A	B	B	-	A	-	B	A	A	B	B	B	B	A
Ps133932	36.6	12	O09_800	Ps001408	Ps000092	Ps119473	1	A	B	A	-	B	-	B	A	B	A	B	A	A	B	B	B	-	A	A	A	-	A	A	B	B	A	A	A	A	B	B	B	A	B	B	A	A	B	B	B	B	A
Ps119673	36.6	12	O09_800	Ps001408	Ps000092	Ps119473	0.445766	A	B	A	B	B	B	B	A	B	A	B	A	A	B	B	B	B	A	A	A	B	A	A	B	B	A	A	A	A	B	-	B	A	B	B	-	A	B	B	-	B	-
Ps154779	36.6	10.8	O09_800	Ps001408	O09_800	Ps001447	0.87278	A	B	A	B	B	B	B	-	-	A	-	A	A	B	B	-	A	A	A	A	B	A	A	B	B	A	A	A	-	B	B	-	A	A	-	-	A	B	B	B	B	A
Ps156732	36.6	11.4	O09_800	Ps001408	O09_800	Ps001447	0.630954	A	B	A	B	B	B	B	-	B	A	B	A	A	B	B	-	-	A	A	A	B	A	-	-	B	A	A	A	A	B	B	B	-	-	B	A	A	B	B	B	B	A
Ps130675	36.6	11.7	O09_800	Ps001408	O09_800	Ps119473	0.537094	A	B	A	B	B	-	B	A	B	A	B	A	A	B	-	B	-	-	A	A	B	A	A	B	B	A	A	A	A	B	B	B	A	A	B	-	A	B	B	B	B	-
Ps159748	36.6	11.1	O09_800	Ps001408	O09_800	Ps135693	0.745603	A	B	A	-	B	B	B	A	B	-	-	A	A	B	B	B	-	A	A	A	B	A	-	B	B	A	A	A	A	-	B	B	-	-	B	A	A	B	B	-	B	A
Ps131711	36.6	12	O09_800	Ps001408	O09_800	Ps119473	0.354539	A	B	A	-	B	B	B	A	B	A	B	A	A	B	B	B	-	A	A	A	B	A	A	B	B	-	A	A	-	B	B	B	A	-	B	A	A	B	B	B	B	A
Ps128177	36.6	11.4	O09_800	Ps001408	O09_800	Ps119473	0.537094	A	B	A	B	B	B	B	A	B	A	B	A	A	B	-	B	B	A	-	-	B	A	A	B	B	A	A	A	A	-	B	B	A	A	B	A	A	B	B	B	B	A
Ps161025	36.6	10.5	O09_800	Ps001408	O09_800	Ps119473	0.869417	-	B	A	-	B	-	B	A	-	A	-	A	A	B	B	B	-	A	A	A	B	-	A	B	B	A	A	A	-	B	B	B	A	A	B	A	A	B	B	-	B	A
Ps123835	36.6	12	O09_800	Ps001408	O09_800	Ps119473	0.445766	A	B	A	B	B	-	B	A	B	A	B	A	A	B	B	B	-	A	A	A	B	A	-	B	B	-	A	-	A	B	B	B	A	A	B	A	A	B	B	B	B	A
Ps143510	36.6	11.7	O09_800	Ps001408	O09_800	Ps119473	0.875896	A	B	A	B	B	-	B	A	B	A	B	A	-	B	-	B	-	A	A	A	B	A	A	B	B	A	A	A	A	B	B	B	A	-	B	A	A	B	B	B	B	A
Ps124835	36.6	11.7	O09_800	Ps001408	O09_800	Ps119473	0.757621	A	B	A	B	B	-	-	A	B	A	B	A	A	B	B	B	-	A	A	A	B	A	A	B	B	A	A	A	A	B	B	-	A	A	B	A	A	B	-	B	B	A
Ps135865	36.6	11.1	O09_800	Ps001408	O09_800	Ps001447	0.875896	A	B	A	B	B	-	B	A	B	A	B	A	-	-	B	B	A	A	A	A	B	A	A	B	B	-	A	A	A	B	B	B	A	A	B	A	-	B	B	B	-	A
Ps150334	36.6	11.1	O09_800	Ps001408	O09_800	Ps119473	0.75183	A	B	A	-	B	-	B	A	B	A	B	A	A	B	B	B	-	A	-	A	-	A	A	-	B	A	A	A	A	-	B	B	A	A	B	A	A	B	B	-	B	A
Ps131390	36.6	12.3	O09_800	Ps001408	O09_800	Ps001447	0.537094	A	B	A	B	B	B	B	A	B	A	B	A	A	B	B	B	-	A	A	A	B	A	A	B	B	-	A	A	A	B	B	-	-	-	B	A	A	B	B	B	B	A
Ps120692	36.6	11.7	O09_800	Ps001408	O09_800	Ps119473	0.445766	A	-	A	B	B	B	B	A	B	A	B	A	A	B	B	B	B	A	A	A	B	A	-	B	B	-	A	A	A	B	B	B	A	A	B	A	A	B	B	B	B	A
Ps123601	36.6	12	O09_800	Ps001408	O09_800	Ps119473	0.878794	A	B	A	B	B	-	B	A	B	A	B	A	A	B	B	B	B	A	A	A	B	A	A	B	B	A	A	A	A	-	B	B	A	-	-	A	A	B	B	-	B	A
Ps129477	36.6	11.4	O09_800	Ps001408	Ps000092	Ps001447	0.757621	A	B	-	B	B	-	B	A	B	A	B	A	A	B	B	B	A	A	A	A	B	A	A	B	B	A	A	A	A	B	-	B	A	A	B	A	A	-	B	B	-	A
Ps121588	36.6	12.6	O09_800	Ps001408	O09_800	Ps119473	0.647315	A	B	A	B	B	B	B	A	B	A	B	-	A	B	-	B	-	A	A	A	B	A	A	B	B	A	A	A	A	B	B	B	A	-	B	A	A	B	B	B	B	A
Ps102896	36.6	12.6	O09_800	Ps001408	O09_800	Ps119473	0.456057	-	B	A	B	B	B	B	A	B	A	B	A	A	B	B	B	B	A	A	A	B	A	A	B	B	A	A	A	A	-	B	B	A	-	B	A	A	B	B	B	B	A
Ps140787	36.6	11.7	O09_800	Ps001408	O09_800	Ps119473	0.639412	A	B	A	B	B	B	B	-	-	A	B	A	A	B	B	B	-	A	A	A	B	A	A	B	B	A	A	A	-	B	-	B	A	-	B	A	A	B	-	B	B	A
Ps119354	36.6	12.3	O09_800	Ps001408	O09_800	Ps119473	0.445766	A	B	A	B	B	-	B	A	B	A	B	A	A	B	B	B	-	A	A	-	B	A	-	B	B	A	A	A	A	B	B	B	A	-	B	A	A	B	B	B	B	A
Ps162496	36.6	10.5	O09_800	Ps001408	O09_800	Ps135693	0.738883	A	B	A	-	B	B	B	A	B	A	B	A	A	-	B	B	-	A	A	A	B	A	A	B	-	A	A	A	-	B	B	B	-	-	-	A	A	-	B	-	-	A
Ps134073	36.6	12	O09_800	Ps001408	O09_800	Ps119473	0.354539	-	B	A	B	B	B	B	A	B	A	B	A	A	B	B	B	B	-	A	A	-	-	A	B	B	A	A	A	A	B	B	B	A	-	B	A	A	B	B	B	B	A
Ps142855	37	9.4	Ps001408	Ps119473	O09_800	Ps119473	0.875896	A	B	A	-	B	A	B	A	B	A	B	A	A	B	B	B	-	A	A	A	B	A	A	B	B	-	A	A	A	B	B	B	A	A	B	-	A	B	B	-	B	A
Ps131335	37	10	Ps001408	Ps119473	O09_800	Ps119473	0.757621	A	B	A	-	B	A	B	A	B	A	B	A	A	B	-	B	B	A	A	-	B	A	-	B	B	A	A	A	A	B	B	B	A	-	B	A	A	B	B	B	B	A
Ps119473	37.3						0.647315	A	B	A	B	B	-	B	A	B	A	B	A	A	B	B	B	B	A	A	A	B	A	A	B	B	A	A	A	A	B	B	B	B	A	B	A	A	B	-	B	-	A
Ps001443	37.3	23.5	Ps001408	Ps119473	Ps001408	Ps001447	0.456057	A	B	A	B	B	B	B	A	B	A	B	A	A	B	B	B	-	A	A	A	B	A	A	B	B	A	A	A	A	B	B	B	B	-	B	A	A	B	B	B	B	A
Ps001226	37.3	23.5	Ps001408	Ps119473	Ps001408	Ps001447	0.456057	A	B	A	B	B	B	B	A	B	A	B	A	A	B	B	B	-	A	A	A	B	A	A	B	B	A	A	A	A	B	B	B	B	-	B	A	A	B	B	B	B	A
Ps111749	37.3	12	Ps119473	Ps001447	Ps001408	Ps001447	0.2278	A	B	-	B	B	-	B	A	B	A	B	A	A	B	B	B	B	A	A	A	B	A	A	B	B	A	A	A	A	B	B	B	B	-	B	A	-	B	B	B	B	A
Ps148312	37.3	10.8	Ps119473	Ps001447	Ps001408	Ps001447	1	A	B	A	B	B	-	B	A	B	A	-	A	A	B	B	-	-	A	A	A	B	A	A	B	B	A	A	A	A	B	B	B	B	-	-	A	-	-	B	B	B	A
Ps138727	37.3	11.1	Ps119473	Ps001447	Ps001408	Ps001447	0.43488	A	B	A	B	B	B	-	A	B	A	B	A	-	B	B	B	-	A	A	A	B	A	A	B	B	-	A	A	A	-	B	B	B	A	B	A	A	B	B	B	B	A
Ps123072	37.3	11.7	Ps119473	Ps001447	Ps001408	Ps001447	0.878794	A	B	A	B	B	-	B	A	B	A	B	A	A	B	B	B	-	A	A	A	-	A	-	B	B	A	A	A	A	B	B	B	B	A	B	A	A	B	B	B	B	A
Ps130712	37.3	12	Ps119473	Ps001447	Ps001408	Ps001447	0.537094	A	B	A	B	-	-	B	A	B	A	B	A	A	B	B	B	-	A	A	A	B	A	A	B	B	A	A	A	A	B	B	B	B	-	B	A	A	B	B	B	B	A
Ps163240	37.3	10.5	Ps119473	Ps001447	Ps001408	Ps001447	1	A	-	A	B	B	-	B	A	B	-	B	A	A	B	B	B	-	A	A	A	B	A	-	B	-	A	A	A	A	-	B	B	B	-	B	A	A	B	-	-	-	A
Ps158319	37.3	10.8	Ps001408	Ps119473	O09_800	Ps001447	0.33039	A	B	A	B	B	-	B	A	B	A	B	A	A	B	B	B	-	A	-	-	B	-	A	B	B	A	A	A	-	B	B	B	-	A	B	-	A	B	-	B	B	A
Ps163528	37.3	10.2	Ps001408	Ps119473	O09_800	Ps103403	0.865772	A	B	A	-	-	B	B	A	B	-	B	A	A	-	B	B	-	-	A	A	B	A	A	B	B	A	A	A	A	B	B	B	-	A	-	A	A	B	-	B	-	A
Ps155414	37.3	10.8	Ps119473	Ps001447	Ps001408	Ps001447	0.630954	-	B	A	B	-	-	B	A	B	A	B	A	A	B	B	B	-	-	-	A	B	A	A	B	-	A	A	A	A	B	B	B	B	A	B	A	A	B	B	B	B	A
Ps155765	37.3	11.1	Ps119473	Ps001447	O09_800	Ps135693	0.630954	A	B	A	-	B	A	-	A	B	A	-	A	A	B	B	B	B	A	A	A	B	A	A	B	B	A	A	A	A	B	-	B	-	-	B	A	A	B	-	B	-	A
Ps123599	37.3	11.7	Ps001408	Ps119473	Ps001408	Ps135693	0.445766	A	B	A	-	B	B	B	A	B	A	B	A	A	B	B	B	-	A	A	A	B	A	A	B	B	A	A	A	-	B	B	B	B	A	B	A	A	-	B	B	B	A
Ps144029	37.3	11.7	Ps119473	Ps001447	Ps001408	Ps001447	0.639412	A	B	A	B	-	-	B	A	B	A	B	A	A	B	B	B	-	A	A	A	B	A	A	-	B	A	A	A	A	B	B	B	B	-	B	A	A	B	B	B	B	A
Ps123772	37.3	12	Ps119473	Ps001447	Ps001408	Ps001447	0.445766	A	B	A	B	B	-	B	A	B	A	B	A	A	B	B	B	-	A	A	A	B	A	-	B	B	A	A	A	A	B	B	B	B	-	B	A	A	B	B	B	B	A
Ps159363	37.3	11.1	Ps119473	Ps001447	Ps001408	Ps001447	0.33039	A	B	A	B	B	-	B	A	B	A	B	A	-	-	B	B	-	A	A	-	B	A	A	B	B	A	A	A	A	B	B	B	B	-	B	A	-	B	-	B	B	A
Ps155999	37.3	11.1	Ps119473	Ps001447	Ps001408	Ps001447	0.42334	A	B	A	B	B	-	B	A	B	-	B	A	-	B	B	B	-	A	A	A	B	A	A	B	-	A	A	A	A	B	B	B	B	-	B	A	-	B	-	B	B	A
Ps140670	37.3	11.1	Ps001408	Ps119473	Ps001408	Ps001447	0.0858128	A	B	A	B	B	B	B	-	B	A	B	A	A	B	B	B	B	A	-	A	B	A	-	B	B	A	A	-	A	B	B	B	B	-	B	A	-	B	B	B	B	A
Ps158149	37.3	10.8	Ps119473	Ps001447	O09_800	Ps001447	0.516412	A	B	A	B	B	B	B	A	B	A	-	A	A	B	B	B	-	-	A	A	B	-	A	B	B	A	A	A	A	-	B	B	-	-	B	-	A	B	-	B	B	A
Ps146499	37.3	10.8	Ps001408	Ps119473	Ps001408	Ps001447	0.205903	A	B	A	B	-	-	B	A	B	A	B	A	A	B	B	-	B	A	A	-	B	A	-	B	B	A	A	A	A	B	B	B	B	-	B	A	A	B	B	B	B	-
Ps112488	37.3	12	Ps119473	Ps001447	Ps001408	Ps001447	0.365712	A	B	A	B	B	B	B	A	B	A	B	A	-	B	B	B	B	A	A	A	B	A	A	B	B	A	A	A	A	B	B	B	B	-	-	A	A	B	-	B	B	A
Ps122565	37.3	11.7	Ps119473	Ps001447	Ps001408	Ps001447	0.878794	A	B	A	B	B	B	B	A	B	A	B	A	A	B	-	B	-	A	A	A	-	A	A	B	B	A	A	A	A	B	B	B	B	A	B	A	A	B	B	-	B	A
Ps154721	37.3	10.8	Ps001408	Ps119473	Ps001408	Ps001447	0.149541	A	B	A	B	B	-	B	A	B	A	B	A	A	B	B	-	B	-	A	A	B	A	A	B	B	-	A	A	-	B	B	B	B	A	B	A	-	B	B	B	B	-
Ps149668	37.3	11.1	Ps119473	Ps001447	Ps001408	Ps001447	0.75183	A	B	A	B	B	B	B	A	B	A	B	A	-	B	B	B	-	A	A	A	B	A	A	-	B	-	A	A	A	B	-	B	B	A	B	A	A	B	-	B	B	A
Ps130545	37.3	11.7	Ps119473	Ps001447	Ps001408	Ps001447	0.537094	A	B	A	B	B	B	B	A	B	A	B	A	A	B	B	B	-	A	A	A	B	A	-	B	B	A	A	-	A	B	B	B	B	A	-	A	A	B	-	B	B	A
Ps137302	37.3	11.7	Ps001408	Ps119473	Ps001408	Ps001447	0.274299	A	B	A	B	B	-	B	A	B	A	-	A	A	B	B	B	B	A	A	-	B	A	A	B	B	A	A	-	A	B	B	B	B	-	B	A	A	B	B	B	B	A
Ps130167	37.3	11.7	Ps119473	Ps001447	Ps001408	Ps001447	0.537094	A	B	A	B	B	B	B	A	B	A	B	A	A	B	B	B	-	A	A	A	B	A	A	-	B	A	A	A	A	B	B	B	B	-	B	A	A	B	-	B	B	A
Ps154579	37.3	10.5	Ps119473	Ps001447	Ps001408	Ps001447	0.42334	-	B	A	B	B	B	-	-	B	A	B	A	A	B	B	-	-	A	A	A	B	A	A	B	B	A	A	A	A	B	B	B	B	-	B	A	A	B	B	B	B	A
Ps151909	37.3	10.8	Ps119473	Ps001447	Ps001408	Ps001447	0.75183	A	B	A	B	B	B	B	A	-	A	B	A	A	B	B	-	B	-	A	A	-	A	A	B	-	A	A	A	A	B	B	B	B	A	B	A	A	-	-	B	B	-
Ps159628	37.3	10.2	Ps119473	Ps001447	Ps001408	Ps001447	0.33039	A	B	A	B	B	B	B	A	B	A	B	A	-	B	B	B	-	A	A	A	-	A	-	B	B	A	-	A	A	B	B	B	B	A	B	-	A	B	B	-	B	A
Ps125798	37.3	11.4	Ps001408	Ps119473	Ps001408	Ps001447	0.122823	A	B	A	B	-	B	B	A	B	-	B	A	A	B	B	B	B	A	A	-	B	A	A	B	B	A	A	A	-	B	B	B	B	A	B	A	A	B	B	B	B	A
Ps127039	37.3	11.4	Ps119473	Ps001447	Ps001408	Ps001447	0.757621	A	B	A	B	B	-	B	A	B	A	-	A	A	B	-	B	B	A	A	A	B	A	A	B	B	A	A	A	A	B	B	-	B	-	B	A	A	B	B	B	B	A
Ps104154	37.3	12	Ps119473	Ps001447	Ps001408	Ps001447	0.296718	-	B	A	B	B	B	B	A	B	A	B	A	A	B	B	B	-	A	A	A	B	-	A	B	B	A	A	A	A	B	B	B	B	A	B	A	A	B	B	B	B	A
Ps111076	37.3	12	Ps119473	Ps001447	Ps001408	Ps001447	0.546494	A	B	A	B	B	B	B	A	B	A	B	A	A	-	B	B	B	A	A	-	-	A	A	B	B	A	A	A	A	B	B	B	B	A	B	A	A	B	B	B	B	A
Ps135076	37.3	11.1	Ps119473	Ps001447	Ps001408	Ps001447	0.354539	-	B	A	B	B	B	B	A	B	A	B	A	A	B	B	B	-	A	A	A	B	A	A	B	B	A	A	A	-	B	B	B	B	-	-	A	A	B	B	-	B	A
Ps161013	37.3	9.9	Ps119473	Ps001447	O09_800	Ps135693	0.869417	A	B	A	-	B	A	B	A	-	A	-	A	A	B	-	B	-	A	A	A	B	-	A	B	B	A	A	A	-	-	B	B	-	-	B	A	A	B	B	B	-	A
Ps149786	37.3	10.8	Ps119473	Ps001447	Ps001408	Ps001447	0.527089	A	B	A	B	-	B	-	A	B	A	B	-	A	B	-	B	-	A	A	A	B	A	-	B	B	A	A	A	A	B	B	B	B	-	B	A	A	B	B	B	B	A
Ps155030	37.3	11.1	Ps119473	Ps001447	Ps001408	Ps001447	0.87278	A	B	-	B	-	-	B	A	B	A	B	A	A	B	B	B	-	A	A	A	B	A	A	B	B	A	A	A	A	-	-	B	B	A	B	A	A	B	B	B	-	A
Ps111472	37.3	11.7	Ps119473	Ps001447	Ps001408	Ps001447	0.763025	A	-	A	B	B	B	B	A	B	A	B	A	A	B	-	B	-	A	A	A	B	A	A	B	B	A	A	A	A	B	B	B	B	A	B	A	A	B	B	B	B	-
Ps126819	37.3	11.1	Ps119473	Ps001447	Ps001408	Ps001447	0.354539	A	B	A	B	B	B	B	A	B	A	B	A	-	B	B	B	-	A	A	A	B	-	-	B	B	A	-	A	A	-	B	B	B	A	B	A	A	B	B	B	B	A
Ps144392	37.3	11.1	Ps119473	Ps001447	Ps001408	Ps001447	0.639412	A	B	A	B	B	-	B	A	B	A	-	A	A	B	B	B	-	A	A	A	B	A	A	B	B	A	-	A	A	B	B	B	B	A	B	-	A	B	B	B	B	A
Ps127530	37.3	11.4	Ps001408	Ps119473	Ps001408	Ps001447	0.354539	A	B	A	B	B	B	B	-	B	A	B	A	A	B	B	B	B	A	A	A	B	A	A	B	B	A	A	A	A	B	B	B	B	A	B	-	-	B	B	-	B	A
Ps113228	37.3	12.3	Ps119473	Ps001447	Ps001408	Ps001447	0.546494	A	B	A	B	B	-	B	A	B	A	B	A	A	B	B	B	-	A	A	A	B	A	A	B	B	A	A	A	A	B	B	B	B	-	B	A	A	B	B	B	B	A
Ps148039	37.3	11.4	Ps119473	Ps001447	Ps001408	Ps001447	0.527089	A	B	A	B	B	-	-	A	B	-	B	A	A	B	B	B	-	A	A	A	B	A	A	B	-	A	A	A	A	B	B	B	B	-	B	A	A	B	B	B	B	A
Ps155127	37.3	10.5	Ps119473	Ps001447	Ps001408	Ps001447	0.87278	A	-	-	B	B	B	-	A	-	A	-	A	A	-	B	B	-	A	A	A	B	A	A	B	B	A	A	A	A	B	-	B	B	A	B	A	A	B	B	B	B	A
Ps158588	37.7	8.3	Ps119473	Ps001447	Ps119473	Ps001447	0.745603	A	-	A	B	B	A	B	A	B	-	B	A	A	B	B	B	A	A	A	A	B	-	A	B	-	A	A	-	-	B	B	B	B	A	B	-	A	-	B	B	B	A
Ps147828	37.7	9.7	Ps119473	Ps001447	O09_800	Ps001447	0.342782	A	B	A	B	B	B	B	A	B	A	B	-	A	B	B	B	-	-	A	A	B	A	A	B	-	A	A	A	B	B	B	B	-	-	-	A	A	B	B	B	B	A
Ps123042	38	10.3	Ps119473	Ps001447	Ps001408	Ps001447	0.445766	A	B	A	B	B	B	B	A	B	A	B	A	A	B	B	B	-	A	A	A	-	A	A	B	B	A	A	A	A	B	B	B	B	B	-	A	-	B	B	B	B	A
Ps132156	38	10	Ps119473	Ps001447	Ps119473	Ps001447	0.537094	A	B	A	B	B	-	B	-	B	A	B	A	A	B	B	B	A	A	A	A	B	-	A	B	B	A	A	A	A	B	B	B	B	A	B	-	A	B	B	B	-	A
Ps124058	38	10.3	Ps119473	Ps001447	Ps119473	Ps001447	0.878794	A	B	A	B	B	B	B	A	B	A	B	A	A	B	B	B	A	A	A	A	B	A	A	B	B	A	A	A	A	B	B	B	B	-	-	A	A	-	B	B	-	A
Ps111053	38	10.3	Ps119473	Ps001447	Ps001408	Ps001447	0.365712	A	B	A	B	B	B	B	A	B	A	B	A	A	B	-	B	B	A	A	A	B	A	-	B	B	A	A	A	A	B	B	B	B	B	B	A	A	B	-	B	B	A
Ps143462	38	9.4	Ps119473	Ps001447	Ps001408	Ps001447	0.639412	A	-	A	B	B	-	B	A	B	A	-	A	A	B	B	B	-	A	A	A	B	A	A	B	B	-	A	-	A	B	B	B	B	B	B	A	A	-	B	B	B	A
Ps140706	38	10	Ps119473	Ps001447	Ps119473	Ps001447	0.875896	A	B	A	B	B	B	B	A	B	A	-	A	A	B	B	-	A	A	A	-	B	A	A	B	-	A	A	A	A	B	B	B	B	-	-	A	A	B	B	B	B	A
Ps144671	38	9.7	Ps119473	Ps001447	Ps001408	Ps001447	0.274299	A	B	A	B	B	B	B	A	B	-	B	A	A	B	B	B	-	A	A	-	B	A	A	B	B	A	A	A	-	B	-	B	B	B	B	A	A	B	B	B	B	A
Ps127235	38	9.7	Ps119473	Ps001447	Ps119473	Ps001447	0.537094	A	B	A	B	B	-	B	A	B	A	B	A	A	B	B	B	A	A	-	A	B	A	A	B	B	A	A	A	-	-	B	B	B	A	B	A	-	B	B	B	B	A
Ps154294	38	9.1	Ps119473	Ps001447	Ps119473	Ps001447	0.630954	A	B	A	B	B	-	B	A	B	A	B	A	A	B	B	B	A	A	-	A	B	A	A	B	B	A	A	A	A	B	B	B	B	-	-	A	-	B	B	-	B	A
Ps134039	38	10.3	Ps119473	Ps001447	Ps001408	Ps001447	0.757621	A	B	A	B	B	-	B	A	B	A	B	A	A	B	B	B	-	A	A	A	B	A	A	B	-	A	A	A	A	B	B	B	B	B	B	A	A	-	B	-	B	A
Ps152846	38	9.4	Ps119473	Ps001447	Ps001408	Ps001447	0.149541	A	B	-	B	B	-	B	A	B	-	B	A	A	B	B	B	-	A	A	A	B	A	A	B	-	A	A	A	-	B	B	B	B	B	B	-	-	B	B	B	B	A
Ps148896	38	9.4	Ps119473	Ps001447	Ps001408	Ps001447	0.75183	A	B	A	B	B	B	B	A	B	A	-	A	A	B	B	B	-	A	A	A	B	A	A	-	B	A	A	A	-	-	B	-	B	B	B	A	A	B	B	-	B	A
Ps134192	38	11.7	Ps119473	Ps001447	O09_800	Ps001447	0.757621	A	B	A	B	B	B	B	A	-	A	-	A	A	B	B	B	A	A	-	-	B	A	A	B	B	A	A	A	A	B	B	B	-	A	B	A	A	B	B	B	B	A
Ps120103	38.2	9.7	Ps119473	Ps001447	Ps119473	Ps001447	0.647315	A	B	-	B	B	B	B	A	B	A	B	A	A	-	B	B	A	A	A	A	B	A	-	B	-	A	A	A	A	B	B	B	B	-	B	A	A	A	B	B	B	A
Ps118550	38.2	10	Ps119473	Ps001447	Ps119473	Ps001447	0.647315	A	B	-	B	B	B	B	A	B	A	B	A	A	B	B	B	A	A	A	A	B	A	A	B	B	A	A	A	A	-	-	B	B	B	B	A	A	B	B	B	B	A
Ps129161	38.2	10	Ps119473	Ps001447	Ps119473	Ps001447	0.537094	A	B	A	B	B	B	B	A	B	A	B	A	A	B	B	B	A	A	-	A	B	A	A	B	-	A	A	A	A	B	B	B	B	B	B	A	A	B	B	B	B	A
Ps001447	38.6						1	A	B	A	A	B	B	B	A	B	A	B	A	A	B	B	B	-	A	A	A	B	A	A	B	-	A	A	A	A	B	-	B	B	-	B	A	A	-	B	B	B	A
Ps001325	38.6	25	Ps001447	Ps135693	Ps119473	Ps135693	0.875896	A	B	A	A	B	B	B	-	B	A	B	A	A	B	B	B	-	A	A	A	B	A	A	B	-	A	A	A	A	B	-	B	B	-	B	A	A	-	B	B	B	A
AB132-405	38.6	33.3	Ps001447	Ps135693	Ps119473	Ps135693	0.87278	A	B	A	A	B	B	B	A	B	A	B	A	A	B	B	B	-	A	A	A	-	-	A	B	-	A	A	A	A	B	-	B	B	-	B	A	-	-	B	B	B	A
Ps900119	38.6	25	Ps119473	Ps001447	Ps119473	Ps135693	0.878794	A	B	A	A	B	B	B	A	B	A	B	A	A	B	B	B	-	A	-	A	B	A	A	B	B	A	A	A	A	B	-	B	B	A	B	A	A	-	B	B	B	A
Ps153328	38.6	10.2	Ps001447	Ps135693	Ps119473	Ps135693	0.42334	A	B	A	A	B	-	B	A	B	A	B	-	A	B	B	B	A	A	A	-	B	A	A	B	B	A	-	A	A	B	B	B	-	-	B	-	A	B	-	B	B	A
Ps113462	38.6	12	Ps119473	Ps001447	Ps119473	Ps135693	0.763025	A	B	A	A	B	B	B	A	B	A	B	-	A	B	B	B	-	A	A	A	B	A	A	B	B	A	A	A	A	B	A	B	B	B	-	A	A	B	B	B	B	A
Ps152061	38.6	11.1	Ps001447	Ps135693	Ps119473	Ps135693	0.75183	A	B	A	A	B	B	B	-	B	-	B	A	-	B	B	B	A	A	A	A	B	A	A	B	-	A	A	A	A	-	-	B	B	-	B	A	A	A	B	B	B	-
Ps132260	38.6	10.8	Ps119473	Ps001447	Ps119473	Ps135693	0.537094	-	B	A	-	B	-	B	A	B	A	B	A	A	B	B	B	A	-	A	A	B	A	A	B	B	A	A	A	A	B	B	B	B	A	B	A	A	B	B	B	-	-
Ps101495	38.6	12.6	Ps001447	Ps135693	Ps119473	Ps135693	1	A	B	A	A	B	B	B	A	B	A	B	A	A	B	B	B	A	A	A	A	B	A	A	B	B	A	A	A	A	B	B	B	B	-	B	A	A	-	B	B	B	A
Ps163344	38.6	10.2	Ps119473	Ps001447	Ps119473	Ps135693	0.738883	-	B	-	-	B	-	B	A	B	A	B	A	A	B	B	B	-	A	A	A	-	A	A	B	-	A	A	A	A	B	-	B	-	B	B	-	A	A	B	B	B	A
Ps139249	38.6	11.1	Ps001447	Ps135693	Ps119473	Ps135693	0.875896	A	B	A	A	B	B	B	A	B	-	-	A	A	B	-	B	A	A	A	A	B	A	A	B	B	A	A	A	A	B	A	B	B	-	B	A	-	A	B	B	B	A
Ps128965	38.6	11.7	Ps001447	Ps135693	Ps119473	Ps135693	0.757621	A	-	A	A	B	B	B	A	B	A	B	A	-	B	B	B	-	A	A	A	B	A	A	B	B	A	A	A	A	-	A	B	B	-	B	A	A	A	B	B	B	A
Ps162368	38.6	9.9	Ps119473	Ps001447	Ps119473	Ps135693	0.621873	A	B	-	A	B	B	B	A	-	A	-	A	-	-	B	B	-	A	A	A	B	A	-	B	B	A	A	A	A	B	B	B	B	-	B	-	A	B	-	B	B	A
Ps137769	38.6	10.8	Ps001447	Ps135693	Ps119473	Ps135693	0.639412	A	B	A	A	B	B	-	A	B	A	B	A	-	B	B	B	-	A	A	A	B	A	A	B	B	A	A	-	A	-	B	B	B	A	B	A	A	A	-	B	B	A
Ps132168	38.6	11.4	Ps001447	Ps135693	Ps119473	Ps135693	0.757621	A	B	A	-	B	-	B	A	B	A	B	A	A	B	B	B	A	A	A	A	B	A	A	B	B	A	A	A	-	B	-	B	B	A	B	A	A	A	B	B	B	A
Ps151105	38.6	11.1	Ps001447	Ps135693	Ps119473	Ps135693	1	A	B	A	A	B	B	B	A	B	A	B	-	A	B	B	B	A	A	A	A	B	A	A	-	B	-	A	A	A	B	-	B	B	-	B	A	A	A	B	B	B	-
Ps110497	38.6	11.7	Ps001447	Ps135693	Ps119473	Ps135693	1	A	B	A	A	B	B	B	A	B	A	B	A	A	B	B	-	B	A	A	A	B	A	A	B	B	A	A	A	A	B	B	B	-	A	B	A	-	A	B	B	B	A
Ps161737	38.6	9.9	Ps119473	Ps001447	Ps119473	Ps135693	0.070546	A	B	-	A	B	B	B	-	B	-	B	A	A	B	B	B	-	A	A	A	B	-	-	-	B	A	A	-	A	B	B	B	B	-	B	-	-	B	B	B	B	A
Ps105906	38.6	12	Ps119473	Ps001447	Ps119473	Ps135693	0.456057	-	B	A	A	B	B	B	A	B	A	B	A	A	B	B	B	-	A	A	A	B	A	A	B	B	A	A	A	A	B	B	-	B	B	B	A	A	B	B	B	B	A
Ps156653	38.6	11.1	Ps001447	Ps135693	Ps119473	Ps135693	0.630954	A	-	A	A	B	B	B	A	-	A	B	A	A	B	B	B	-	A	A	A	B	A	A	B	B	A	A	A	A	B	-	B	B	-	B	A	A	A	-	-	B	A
Ps143163	38.6	11.4	Ps001447	Ps135693	Ps119473	Ps135693	0.875896	A	B	A	A	B	B	B	A	B	A	B	A	A	B	-	B	A	-	A	A	B	A	A	B	-	A	A	A	A	B	B	B	-	-	B	A	A	B	B	B	B	A
Ps158738	38.6	10.5	Ps001447	Ps135693	Ps119473	Ps135693	0.745603	A	B	A	A	B	B	B	A	B	A	B	A	A	-	B	B	B	A	A	A	B	-	A	B	B	A	A	-	-	B	-	B	B	-	B	A	A	A	-	B	B	A
Ps129919	38.6	11.1	Ps001447	Ps135693	Ps119473	Ps135693	0.537094	-	B	A	A	B	-	B	A	-	A	B	A	A	B	B	B	A	A	A	A	B	A	-	B	B	A	A	A	A	B	B	B	B	B	B	A	A	B	B	B	B	-
Ps144270	38.6	10.8	Ps001447	Ps135693	Ps119473	Ps135693	0.875896	-	-	A	A	B	B	B	A	B	A	B	A	-	B	B	B	A	A	-	A	B	A	A	B	B	A	A	A	A	B	B	B	B	-	B	A	A	A	B	-	-	A
Ps147089	38.6	10.8	Ps001447	Ps135693	Ps119473	Ps135693	0.75183	A	B	A	A	B	B	B	A	B	-	B	-	A	B	B	B	-	A	A	-	B	A	A	B	B	A	A	A	A	B	-	B	-	A	B	A	-	A	B	B	B	A
Ps119476	38.6	11.4	Ps119473	Ps001447	Ps119473	Ps135693	0.647315	A	B	A	A	B	B	B	A	B	A	B	-	A	B	B	B	B	A	A	A	B	A	A	B	B	A	A	A	A	B	B	B	B	A	-	-	A	B	-	B	B	A
Ps143743	38.6	11.4	Ps119473	Ps001447	Ps119473	Ps135693	0.875896	A	B	A	A	B	B	B	A	-	-	B	A	A	B	B	B	-	-	A	A	B	A	A	-	B	A	A	A	A	B	A	B	B	B	B	A	A	-	B	B	B	A
Ps121056	38.6	11.4	Ps001447	Ps135693	Ps119473	Ps103403	0.878794	A	-	A	A	-	-	B	A	B	A	B	A	A	B	B	B	-	A	A	A	B	A	-	B	B	A	A	A	A	B	A	B	B	B	B	A	A	A	B	B	B	A
Ps125068	38.6	12	Ps119473	Ps001447	Ps119473	Ps135693	0.757621	A	B	A	A	B	-	B	A	B	A	B	A	A	B	B	B	-	A	A	A	B	A	A	B	B	A	A	A	A	-	-	B	B	A	B	A	A	-	B	B	B	A
Ps112664	38.6	12.6	Ps001447	Ps135693	Ps119473	Ps135693	1	A	B	A	A	B	B	B	A	B	A	B	A	A	B	B	B	-	A	A	A	B	A	A	B	B	A	A	A	A	B	-	B	B	-	B	A	A	A	B	B	B	A
Ps122322	38.6	12	Ps119473	Ps001447	Ps119473	Ps135693	0.878794	A	B	A	A	B	B	B	A	B	A	B	A	A	B	B	B	B	A	A	A	-	A	A	-	B	A	A	A	A	B	-	B	B	-	B	A	A	B	B	B	B	A
Ps147447	38.6	10.8	Ps119473	Ps001447	Ps119473	Ps135693	0.75183	A	B	A	A	B	-	B	A	B	A	B	A	A	B	B	B	-	A	A	A	-	A	A	B	B	A	A	A	-	B	B	B	-	-	B	-	-	B	B	B	B	A
Ps157713	38.6	10.5	Ps119473	Ps001447	Ps119473	Ps135693	0.516412	-	B	A	-	B	B	B	A	B	A	B	A	A	B	B	B	-	A	A	A	B	A	A	B	B	A	A	-	-	-	-	B	B	B	-	-	A	A	B	B	B	A
Ps142037	38.6	11.1	Ps119473	Ps001447	Ps119473	Ps135693	0.875896	A	B	A	A	-	B	B	A	B	A	B	A	A	B	B	B	B	A	A	A	B	-	A	B	B	A	-	A	A	B	B	B	B	A	-	A	A	-	-	B	B	A
Ps159121	38.6	10.2	Ps119473	Ps001447	Ps119473	Ps135693	0.516412	A	-	A	A	B	-	B	A	B	A	B	A	A	B	B	B	-	A	-	A	B	A	A	-	B	A	-	A	A	-	A	B	-	B	B	A	A	A	-	B	B	A
Ps133171	38.6	11.4	Ps001447	Ps135693	Ps119473	Ps135693	0.757621	A	B	A	A	B	B	B	A	B	A	B	-	-	B	B	B	-	A	A	A	B	A	A	B	B	-	A	A	A	B	B	B	B	A	B	A	A	A	B	B	B	A
Ps159371	38.6	10.8	Ps119473	Ps001447	Ps119473	Ps135693	0.516412	A	B	A	A	B	B	B	A	B	-	B	A	A	B	B	B	B	A	A	-	B	A	A	B	B	A	A	-	-	B	-	B	B	-	B	A	A	-	B	B	-	A
Ps119700	38.6	11.4	Ps119473	Ps001447	Ps119473	Ps135693	0.878794	A	-	A	A	B	-	B	A	B	A	B	A	A	-	B	B	-	A	A	A	-	A	A	B	B	A	A	A	A	B	B	B	B	B	B	A	A	B	B	B	B	A
Ps160153	38.6	10.5	Ps119473	Ps001447	Ps119473	Ps135693	0.745603	A	B	A	A	B	-	B	A	B	-	B	A	A	B	B	B	-	A	-	A	B	A	A	-	B	A	A	A	-	B	A	B	B	A	B	A	A	-	B	-	-	A
Ps147701	38.6	10.8	Ps001447	Ps135693	Ps119473	Ps135693	0.75183	A	B	-	A	B	B	B	A	B	A	B	-	A	B	B	B	-	A	A	A	B	A	A	B	B	A	A	-	-	B	A	B	B	-	B	A	A	A	-	B	B	A
Ps162979	38.6	9.9	Ps001447	Ps135693	Ps119473	Ps103403	0.738883	A	B	A	-	-	-	B	A	B	-	B	A	A	B	B	B	A	A	-	A	B	-	A	-	B	A	A	A	-	B	B	B	-	A	B	-	A	B	-	B	B	A
Ps133095	38.6	10.8	Ps119473	Ps001447	Ps119473	Ps135693	0.537094	A	B	-	-	B	B	B	A	B	A	B	A	A	B	B	B	B	A	A	A	B	A	-	B	B	-	A	A	A	B	B	B	B	A	B	A	A	A	B	-	B	A
Ps157974	38.6	10.8	Ps001447	Ps135693	Ps119473	Ps135693	0.745603	A	B	A	A	B	B	B	A	B	A	B	-	A	-	B	B	-	A	A	A	B	A	A	B	B	A	A	-	A	B	B	B	B	-	B	A	A	-	-	-	B	A
Ps140315	38.6	11.4	Ps119473	Ps001447	Ps119473	Ps135693	0.875896	A	B	A	A	B	-	B	A	-	A	B	A	A	B	B	B	-	A	A	A	B	A	A	B	-	A	A	A	A	B	A	B	B	A	B	A	-	-	B	B	B	A
Ps101892	38.6	12.3	Ps001447	Ps135693	Ps119473	Ps135693	0.768083	A	B	A	A	B	B	B	A	B	A	B	A	A	B	B	B	A	A	A	A	B	A	A	B	B	A	A	A	A	B	B	B	B	A	B	A	A	B	B	B	B	A
Ps147829	38.6	11.1	Ps119473	Ps001447	Ps119473	Ps135693	0.75183	A	B	A	A	B	B	B	A	B	A	B	-	A	B	B	B	B	A	A	A	B	A	A	B	B	A	A	-	A	B	B	B	B	-	B	A	A	-	-	-	B	A
Ps150073	38.6	10.8	Ps001447	Ps135693	Ps119473	Ps135693	1	A	B	-	A	B	B	-	A	B	-	B	A	A	B	B	B	A	A	A	A	B	A	A	B	B	A	A	A	A	B	A	B	B	-	B	A	-	A	B	B	B	A
Ps157134	38.6	10.5	Ps001447	Ps135693	Ps119473	Ps135693	0.87278	A	B	A	A	B	B	B	-	B	A	-	A	A	B	B	B	A	-	A	A	-	A	A	B	B	A	A	-	A	B	B	-	B	-	B	A	A	-	B	-	B	A
Ps148203	38.6	10.8	Ps119473	Ps001447	Ps119473	Ps135693	0.205903	A	B	A	A	B	-	B	-	B	A	B	-	A	B	B	B	-	A	A	A	B	A	A	B	B	-	A	A	A	B	B	B	B	-	B	A	-	B	B	B	B	A
Ps100439	38.6	12.3	Ps119473	Ps001447	Ps119473	Ps135693	0.66168	A	B	A	A	B	B	B	A	B	A	B	A	A	B	B	B	B	A	A	A	B	A	A	B	B	A	A	A	A	B	B	B	B	A	-	A	A	B	B	B	B	A
Ps136637	38.6	11.1	Ps119473	Ps001447	Ps119473	Ps135693	0.43488	A	B	-	A	B	B	B	A	B	A	-	A	A	B	B	B	B	A	A	-	B	A	-	B	B	A	A	A	A	B	-	B	B	A	B	A	A	-	B	B	B	A
Ps101672	38.6	12.3	Ps001447	Ps135693	Ps119473	Ps135693	0.768083	A	B	A	A	B	B	B	A	B	A	B	A	A	B	B	B	B	A	A	A	B	A	A	B	B	A	A	A	A	B	A	B	-	A	B	A	A	A	B	B	B	A
Ps155649	38.6	11.4	Ps001447	Ps135693	Ps119473	Ps135693	0.630954	A	B	-	A	B	B	B	A	B	A	B	A	A	B	B	B	-	A	A	A	B	-	A	-	B	A	A	A	-	B	-	B	B	-	B	A	A	-	B	B	B	A
Ps142199	38.6	11.1	Ps119473	Ps001447	Ps119473	Ps135693	0.875896	A	B	A	A	B	-	B	A	-	A	-	A	A	B	B	B	-	A	A	A	B	A	A	B	B	A	A	-	A	B	-	B	B	A	B	A	A	B	B	-	B	A
Ps119324	38.6	11.4	Ps001447	Ps135693	Ps119473	Ps135693	0.878794	A	B	A	A	B	-	B	A	B	A	-	A	A	B	B	B	B	A	-	A	B	A	A	B	B	A	A	-	A	B	A	B	B	A	B	A	A	A	B	B	B	A
Ps129915	38.6	11.4	Ps001447	Ps135693	Ps119473	Ps103403	0.757621	A	B	-	A	-	B	B	A	B	A	B	A	A	B	B	B	A	-	A	A	B	A	A	B	B	A	A	A	-	B	-	B	B	B	B	A	A	A	B	B	B	A
Ps155950	38.6	11.1	Ps001447	Ps135693	Ps119473	Ps135693	0.630954	A	B	A	A	B	B	-	A	B	A	B	A	A	B	B	B	-	-	-	A	B	A	A	B	-	A	A	A	-	B	B	B	B	-	B	A	A	A	B	B	B	A
Ps152808	38.6	9.9	Ps119473	Ps001447	Ps119473	Ps135693	0.87278	A	B	-	A	B	B	B	A	B	-	B	A	A	B	-	B	B	A	A	A	-	A	A	B	B	-	A	A	A	-	A	B	B	A	B	-	A	A	B	B	B	A
Ps115925	38.6	11.7	Ps001447	Ps135693	Ps119473	Ps135693	0.647315	A	B	A	A	B	-	B	A	B	A	B	A	A	B	B	B	-	A	A	A	B	A	A	B	B	A	A	A	A	B	A	B	-	-	B	A	A	A	B	B	B	A
Ps153483	38.6	11.1	Ps001447	Ps135693	Ps119473	Ps135693	0.87278	A	B	A	A	B	B	B	A	B	A	-	-	A	-	B	B	-	A	A	-	B	A	A	B	B	A	A	A	A	B	B	B	B	-	-	A	A	-	B	B	B	A
Ps153570	38.6	10.8	Ps119473	Ps001447	Ps119473	Ps135693	0.87278	A	B	A	A	B	B	B	A	B	A	B	A	A	B	B	B	-	A	A	A	B	A	A	-	B	A	A	A	-	-	-	B	-	B	B	A	A	A	B	B	B	-
Ps125478	38.6	11.4	Ps001447	Ps135693	Ps119473	Ps135693	0.757621	A	B	A	A	B	B	B	A	B	A	-	A	A	-	B	B	A	A	A	A	B	A	A	B	B	A	A	A	A	B	B	B	B	-	B	A	A	-	-	-	B	A
Ps109617	38.6	12	Ps119473	Ps001447	Ps119473	Ps135693	0.763025	A	-	A	A	B	B	B	A	B	A	B	A	A	B	B	B	-	A	-	A	B	A	A	B	B	A	A	A	A	B	B	B	B	A	B	A	A	B	B	B	B	A
Ps160510	38.6	10.5	Ps001447	Ps135693	Ps119473	Ps135693	0.621873	A	B	A	A	B	B	-	A	B	A	-	A	A	B	-	B	-	A	A	A	B	A	A	-	B	A	A	A	A	-	-	B	B	-	B	-	A	-	B	B	B	A
Ps147823	38.6	11.4	Ps001447	Ps135693	Ps119473	Ps135693	0.75183	A	B	A	A	B	B	-	A	B	A	B	A	A	B	B	B	-	A	-	A	-	A	A	B	B	A	A	-	A	B	-	B	B	-	B	A	A	-	B	B	B	A
Ps137913	38.6	11.4	Ps001447	Ps135693	Ps119473	Ps135693	0.875896	A	-	A	A	B	-	B	A	B	A	B	A	A	B	B	B	-	A	A	A	B	A	-	B	B	A	A	A	A	B	-	B	B	-	B	A	A	A	-	B	B	A
Ps158774	38.6	10.2	Ps001447	Ps135693	Ps119473	Ps135693	0.745603	A	B	A	A	B	-	B	A	B	A	B	A	A	B	B	B	B	A	A	A	B	-	A	B	B	-	A	A	-	-	A	B	B	-	B	A	A	A	B	B	-	A
Ps153346	38.6	10.5	Ps001447	Ps135693	Ps119473	Ps135693	0.87278	A	-	A	A	B	B	B	-	B	A	B	A	A	-	B	B	A	A	A	A	B	A	A	B	B	A	A	A	A	B	-	B	-	B	B	-	A	B	B	B	-	A
Ps134947	38.6	11.7	Ps119473	Ps001447	Ps119473	Ps135693	0.757621	A	B	A	A	B	-	B	A	B	-	B	A	A	B	B	B	-	A	A	A	B	A	A	B	B	A	A	A	A	B	B	B	B	-	B	A	A	B	-	B	B	A
Ps146694	38.6	10.5	Ps119473	Ps001447	Ps119473	Ps135693	0.342782	A	B	A	A	B	B	-	A	B	A	B	A	-	B	B	B	B	A	-	A	-	A	A	B	B	A	A	A	A	B	B	B	B	B	B	A	A	B	-	B	B	A
Ps151969	38.6	11.1	Ps119473	Ps001447	Ps119473	Ps135693	0.527089	A	B	A	A	B	B	B	A	B	A	B	-	A	B	B	B	-	A	A	-	B	A	A	B	B	A	A	A	A	B	B	B	-	-	B	A	A	B	B	B	-	A
Ps138321	38.6	11.1	Ps119473	Ps001447	Ps119473	Ps103403	0.875896	A	B	A	A	-	B	-	A	B	A	B	A	A	B	B	B	-	A	-	A	B	A	A	-	B	A	A	A	A	B	B	B	-	B	B	A	A	-	B	B	B	A
Ps119945	38.6	12	Ps119473	Ps001447	Ps119473	Ps135693	0.878794	A	B	A	A	B	-	B	A	B	A	B	A	A	B	B	B	B	A	A	A	B	A	A	B	B	A	A	A	A	B	-	B	B	-	B	A	A	B	B	B	B	A
Ps145175	38.6	11.1	Ps001447	Ps135693	Ps119473	Ps135693	1	A	B	A	-	B	B	B	A	B	-	-	-	A	B	B	B	A	A	A	A	B	A	A	B	B	A	A	A	A	-	B	B	-	A	B	A	A	-	B	B	B	A
Ps144642	38.6	11.4	Ps119473	Ps001447	Ps119473	Ps135693	0.639412	A	-	A	A	B	-	B	A	B	-	B	A	A	B	B	B	-	A	A	A	B	-	A	B	B	A	A	A	A	B	B	B	B	-	B	A	A	B	B	B	B	A
Ps145756	38.6	11.1	Ps119473	Ps001447	Ps119473	Ps135693	0.75183	-	B	A	A	B	B	B	A	B	A	-	A	A	B	B	B	-	A	A	A	B	A	A	B	B	A	A	A	-	B	-	B	-	-	B	A	A	B	B	B	B	A
Ps129934	38.6	11.1	Ps119473	Ps001447	Ps119473	Ps135693	0.757621	A	B	A	A	B	-	-	A	B	A	B	A	A	B	B	B	-	A	A	A	B	A	A	B	B	A	A	A	A	-	B	-	-	A	B	A	A	B	B	B	B	A
Ps161960	38.6	10.2	Ps001447	Ps135693	Ps119473	Ps135693	0.621873	A	B	A	A	B	-	B	A	B	-	-	-	A	B	B	B	A	A	A	A	B	A	-	-	B	A	A	A	-	B	-	B	B	-	B	-	A	-	B	B	B	A
Ps141710	38.6	11.1	Ps119473	Ps001447	Ps119473	Ps135693	0.639412	A	B	A	A	B	B	B	A	B	A	-	-	A	B	B	B	B	A	A	A	B	A	A	B	B	A	A	A	A	B	B	B	B	-	B	A	A	B	-	-	B	-
Ps119025	38.6	12	Ps001447	Ps135693	Ps119473	Ps135693	0.647315	A	B	A	A	B	B	B	A	-	A	B	A	A	B	B	B	A	A	A	A	B	A	A	B	B	A	A	A	A	B	-	B	B	-	B	A	A	A	B	B	B	A
Ps160141	38.6	10.2	Ps001447	Ps135693	Ps119473	Ps135693	0.516412	A	B	A	A	B	B	B	A	B	-	B	A	A	B	B	B	A	A	A	-	B	A	-	B	B	A	A	A	-	B	B	-	-	-	B	A	A	B	B	B	B	A
Ps134370	38.6	11.4	Ps001447	Ps135693	Ps119473	Ps135693	0.757621	A	B	A	A	B	B	B	A	B	A	B	A	A	-	B	B	-	A	A	A	B	A	-	B	B	A	A	A	A	B	-	B	B	A	-	A	A	A	B	-	B	A
Ps104220	38.6	12.3	Ps119473	Ps001447	Ps119473	Ps135693	0.654721	A	B	A	A	B	B	B	A	B	A	B	A	-	B	B	B	B	A	A	A	B	A	A	B	B	A	A	A	A	B	A	B	B	-	B	A	A	-	B	B	B	A
Ps156740	38.6	10.2	Ps001447	Ps135693	Ps119473	Ps135693	0.42334	A	-	A	A	B	-	B	A	B	A	B	A	A	B	B	B	B	A	A	-	B	A	A	B	B	A	A	A	A	B	A	B	-	A	-	A	A	A	-	B	B	A
Ps143994	38.6	12	Ps001447	Ps135693	Ps119473	Ps135693	0.875896	A	B	A	A	B	B	B	A	B	A	B	A	A	B	B	B	-	A	A	A	-	A	A	B	B	-	A	A	A	B	-	B	B	-	B	A	A	-	B	B	B	A
Ps123710	38.6	12	Ps119473	Ps001447	Ps119473	Ps135693	0.647315	A	B	A	A	B	B	B	A	B	A	B	A	-	B	B	B	-	A	A	A	B	A	A	B	B	A	A	A	A	B	B	B	B	-	B	A	A	B	B	-	B	A
Ps144676	38.6	11.4	Ps119473	Ps001447	Ps119473	Ps135693	0.875896	A	B	A	A	B	-	B	A	B	A	-	A	A	B	-	B	-	A	A	A	B	A	A	-	B	A	A	A	A	B	B	B	B	-	B	A	A	B	B	B	B	A
Ps161970	38.6	9.9	Ps119473	Ps001447	Ps119473	Ps135693	0.621873	A	-	A	A	B	-	B	A	-	A	B	A	A	B	B	B	B	A	A	A	B	A	A	-	B	A	A	A	-	B	A	B	B	-	B	-	A	-	B	-	B	A
Ps161455	38.6	10.5	Ps001447	Ps135693	Ps119473	Ps135693	0.621873	A	B	A	A	B	B	B	A	B	A	B	-	A	B	B	-	A	A	A	A	B	A	-	B	B	-	A	A	-	B	-	B	B	-	B	A	-	-	B	B	-	A
Ps154995	38.6	11.4	Ps001447	Ps135693	Ps119473	Ps135693	0.87278	A	B	A	A	B	B	B	A	B	A	B	A	A	B	B	B	-	A	A	-	B	A	A	B	B	A	A	A	A	-	-	B	B	-	B	A	-	-	B	B	B	A
Ps149383	38.6	10.5	Ps001447	Ps135693	Ps119473	Ps135693	0.75183	A	B	-	A	B	B	B	-	B	A	-	A	A	B	B	B	A	A	A	A	B	A	A	B	B	-	-	A	A	B	-	B	B	B	B	A	A	A	-	B	B	A
Ps146038	38.6	10.5	Ps001447	Ps135693	Ps119473	Ps135693	0.342782	A	B	A	A	B	B	-	A	-	A	-	A	A	B	B	B	A	A	A	-	B	A	A	-	B	A	A	A	A	B	A	B	B	-	B	A	A	A	-	B	B	A
Ps162336	38.6	10.5	Ps001447	Ps135693	Ps119473	Ps135693	0.869417	A	-	A	A	B	B	B	A	B	A	B	A	A	B	B	B	-	A	A	-	B	A	A	-	B	A	A	A	A	B	-	B	B	-	B	-	A	-	-	B	-	A
Ps101306	38.6	12	Ps119473	Ps001447	Ps119473	Ps135693	1	A	B	A	A	B	-	B	A	B	A	B	A	A	B	B	B	B	A	A	A	B	A	A	B	B	A	A	A	A	B	B	B	B	A	B	A	A	B	B	B	B	A
Ps144136	38.6	11.7	Ps001447	Ps135693	Ps119473	Ps135693	0.875896	A	B	A	A	B	B	B	A	B	A	B	A	A	B	B	B	-	-	A	A	B	A	A	B	B	A	A	A	A	B	-	B	B	-	B	A	A	-	B	B	-	A
Ps136309	38.6	11.1	Ps119473	Ps001447	Ps119473	Ps135693	0.274299	A	B	A	A	B	B	B	A	B	A	B	A	A	-	B	B	-	A	A	A	B	A	A	B	B	A	A	-	-	B	B	B	B	-	B	-	-	B	B	B	B	A
Ps154983	38.6	11.1	Ps119473	Ps001447	O09_800	Ps135693	0.630954	A	B	A	-	B	B	-	A	B	A	B	A	A	B	B	-	-	-	A	A	B	A	-	B	B	A	A	A	A	B	B	B	-	B	B	A	A	B	B	B	B	A
Ps155900	38.6	11.1	Ps119473	Ps001447	Ps119473	Ps135693	0.87278	A	B	A	A	B	B	B	A	B	A	-	A	A	B	B	B	-	A	A	A	B	A	-	-	B	A	A	A	A	-	A	B	B	-	B	A	A	-	B	B	B	A
Ps133002	38.6	11.4	Ps001447	Ps135693	Ps119473	Ps135693	0.757621	A	B	A	A	B	B	B	A	B	A	B	A	A	B	B	B	A	A	-	A	B	A	A	B	B	A	A	A	A	B	A	B	B	-	B	A	-	A	-	B	B	A
Ps133352	38.6	11.7	Ps001447	Ps135693	Ps119473	Ps135693	0.757621	A	B	A	A	B	B	B	A	B	-	B	A	-	B	B	B	-	A	A	A	B	A	A	B	B	A	-	A	A	B	A	B	B	-	B	A	A	A	B	B	B	A
Ps146082	38.6	10.8	Ps119473	Ps001447	Ps119473	Ps135693	0.75183	A	B	A	A	B	-	B	A	B	A	-	-	A	B	B	B	-	A	A	A	B	A	A	-	B	A	A	-	A	B	-	B	B	A	B	A	A	B	B	B	B	A
Ps143638	38.6	11.4	Ps119473	Ps001447	Ps119473	Ps135693	0.639412	A	B	A	A	B	B	B	A	B	A	-	A	A	B	B	B	-	-	A	A	B	A	-	B	B	A	A	A	A	B	B	-	B	-	B	A	A	B	B	B	B	A
Ps117102	38.6	11.4	Ps001447	Ps135693	Ps119473	Ps135693	0.878794	A	B	A	A	B	B	B	A	B	A	B	A	A	B	B	B	A	A	A	A	-	A	A	B	B	A	A	A	-	B	-	B	-	B	B	-	A	A	B	B	B	A
Ps129450	38.6	11.7	Ps001447	Ps135693	Ps119473	Ps135693	1	A	B	A	A	B	B	B	A	B	A	B	A	A	B	B	B	-	A	A	A	B	A	A	B	B	A	A	A	-	B	A	B	B	-	B	A	A	A	B	B	B	A
Ps162870	38.6	9.6	Ps001447	Ps135693	Ps119473	Ps135693	0.738883	A	B	-	A	B	-	B	-	B	A	B	A	A	B	B	B	A	A	-	A	B	A	A	B	B	A	A	A	-	B	-	B	B	-	B	-	-	A	-	-	B	A
Ps157142	38.6	11.1	Ps119473	Ps001447	Ps119473	Ps103403	0.87278	-	B	A	A	-	B	B	A	-	A	B	A	A	B	B	B	-	A	A	A	B	A	A	B	B	A	A	A	A	-	-	-	B	-	B	A	A	B	B	B	B	A
Ps125346	38.6	11.4	Ps001447	Ps135693	Ps119473	Ps135693	1	A	B	A	A	B	B	B	A	B	A	B	A	A	B	B	B	A	-	A	A	B	-	A	-	B	A	A	A	A	B	A	B	B	-	B	A	A	-	B	B	B	A
Ps148768	38.6	11.4	Ps001447	Ps135693	Ps119473	Ps135693	0.75183	A	B	A	A	B	-	B	A	B	A	B	A	A	B	B	B	-	-	A	-	B	A	A	B	B	A	A	A	A	B	-	B	B	-	B	A	A	-	B	B	B	A
Ps139360	38.6	10.5	Ps001447	Ps135693	Ps119473	Ps103403	0.639412	A	B	A	-	-	-	B	A	B	A	B	A	A	B	B	B	A	A	A	-	B	A	-	B	B	A	A	A	A	B	B	B	B	A	B	A	A	B	B	B	B	-
Ps133887	38.6	11.7	Ps001447	Ps135693	Ps119473	Ps135693	0.757621	A	B	A	A	B	-	B	A	B	A	B	A	A	B	B	B	A	A	A	A	B	A	A	B	B	A	A	A	A	B	B	B	B	-	-	A	A	-	B	B	B	A
Ps161362	38.6	9.9	Ps001447	Ps135693	Ps119473	Ps135693	0.869417	A	B	A	A	B	B	B	A	-	A	B	A	A	-	B	B	-	-	-	-	B	A	A	-	B	A	A	A	A	B	B	B	B	A	B	-	A	A	B	B	B	A
Ps150436	38.6	11.4	Ps119473	Ps001447	Ps119473	Ps135693	1	A	B	A	A	B	B	B	A	B	A	-	A	A	B	-	B	-	A	A	A	B	A	A	B	B	A	A	A	A	B	-	B	B	-	B	-	A	B	B	-	B	A
Ps101308	38.6	12.3	Ps119473	Ps001447	Ps119473	Ps135693	0.768083	A	B	A	A	B	B	B	A	B	A	B	-	A	B	B	B	B	A	A	A	B	A	A	B	-	A	A	A	A	B	B	B	B	B	B	A	A	A	B	B	B	A
Ps149398	38.6	11.1	Ps001447	Ps135693	Ps119473	Ps135693	1	A	B	A	A	B	-	B	A	B	A	-	A	A	B	B	B	-	A	A	A	B	A	A	B	B	A	A	A	-	B	-	B	B	-	B	A	-	A	B	B	-	A
Ps158219	38.9	8.6	Ps001447	Ps135693	Ps119473	Ps135693	1	A	B	-	A	B	A	B	-	B	-	-	A	A	B	B	B	B	A	A	A	-	A	A	B	-	A	A	A	A	B	-	B	B	A	B	A	A	B	B	-	B	A
Ps130096	39.3	9.4	Ps001447	Ps135693	Ps001447	Ps103403	0.537094	A	B	A	A	A	B	B	A	B	A	B	A	A	-	B	B	A	A	A	A	B	A	A	B	B	A	A	A	A	B	-	-	B	B	B	-	A	A	B	B	B	A
Ps135693	40						0.43488	A	B	A	A	A	-	B	A	B	A	B	A	A	B	B	B	A	A	A	-	B	A	A	B	B	A	A	A	A	-	-	B	B	A	B	A	-	A	B	B	B	A
Ps160977	40	9.6	Ps135693	Ps103403	Ps119473	Ps103403	0.869417	A	B	A	A	-	-	B	A	B	A	-	A	A	B	B	B	A	-	A	A	B	A	A	B	B	A	A	A	-	B	B	B	B	A	-	A	A	-	B	B	-	A
Ps151502	40	11.4	Ps135693	Ps103403	Ps119473	Ps103403	0.75183	A	B	A	A	-	B	B	A	B	A	B	A	A	B	B	B	-	-	A	A	B	A	A	B	B	A	A	A	A	B	-	B	B	-	B	A	A	A	B	-	B	A
Ps156591	40	10.8	Ps135693	Ps103403	Ps119473	Ps103403	0.42334	A	B	A	A	-	B	B	A	B	A	B	A	A	B	B	B	A	A	A	A	B	-	A	-	B	A	A	A	A	-	-	-	B	A	B	A	-	A	-	B	B	A
Ps162377	40	9.6	Ps135693	Ps103403	Ps001447	Ps001516	0.621873	A	B	A	A	A	-	-	A	B	A	B	-	A	B	-	B	A	A	A	A	B	A	A	-	B	A	A	A	-	B	-	B	B	-	B	-	A	-	B	B	B	-
Ps159489	40	9.6	Ps135693	Ps103403	Ps001447	Ps103403	0.516412	A	B	A	A	A	B	B	A	B	A	B	A	-	B	B	B	A	-	A	A	B	-	A	B	B	A	-	A	A	B	B	B	B	-	B	A	A	-	B	B	-	-
Ps152647	40	10.2	Ps135693	Ps103403	Ps119473	Ps103403	0.262332	A	B	A	A	-	-	B	A	B	A	B	A	A	B	B	B	A	A	A	A	-	A	A	B	B	A	A	A	-	-	A	B	-	A	B	A	A	-	B	B	B	A
Ps160937	40	9.9	Ps135693	Ps103403	Ps119473	Ps103403	0.41108	A	-	-	-	-	-	-	A	B	-	B	A	A	B	B	B	A	A	A	A	B	A	A	B	B	A	A	A	A	-	A	B	B	A	B	-	A	A	-	B	B	A
Ps159616	40.3	8	Ps135693	Ps103403	Ps001447	Ps103403	0.194366	A	-	A	A	A	B	-	A	B	A	-	A	A	B	B	B	-	A	A	A	B	A	A	B	-	A	A	A	B	-	A	B	B	-	B	A	A	A	-	B	-	A
Ps145661	40.7	11.1	Ps135693	Ps103403	Ps135693	Ps001259	0.342782	-	B	A	A	A	-	B	A	B	A	B	-	A	B	A	B	A	A	A	A	B	A	A	B	B	A	A	A	-	B	A	B	B	A	B	-	A	A	B	-	B	A
Ps129936	40.7	8.9	Ps135693	Ps103403	Ps135693	Ps103403	0.757621	A	B	A	A	A	B	B	A	B	A	B	A	A	B	A	B	A	-	A	A	B	A	A	B	B	A	A	A	A	B	-	B	B	-	B	A	A	A	B	-	B	-
Ps110134	40.7	8.6	Ps135693	Ps103403	Ps135693	Ps001516	0.365712	A	B	A	A	A	A	-	A	B	A	B	A	A	B	A	B	-	A	A	A	B	A	A	B	B	-	-	A	A	B	A	B	B	A	B	B	A	A	B	B	B	A
Ps126799	40.7	9.7	Ps135693	Ps103403	Ps135693	Ps001516	0.757621	A	B	A	A	A	B	B	A	B	A	-	A	A	B	-	B	A	-	A	A	B	A	A	-	B	A	A	A	A	B	A	B	B	-	B	B	-	A	B	B	B	A
Ps154217	40.8	8.9	Ps135693	Ps103403	Ps135693	Ps001516	0.630954	A	B	A	A	A	-	B	A	B	A	B	A	A	B	-	-	A	A	-	-	B	A	A	B	B	A	A	-	A	B	A	B	B	B	B	B	A	A	-	-	B	A
Ps153151	40.9	8.6	Ps135693	Ps103403	Ps135693	Ps001516	0.149541	A	B	A	A	A	-	B	A	-	A	-	A	A	B	A	B	A	-	A	A	B	A	-	-	B	A	A	A	A	B	A	B	-	B	-	B	A	A	B	-	B	A
Ps124535	41	9.7	Ps135693	Ps103403	Ps135693	Ps001516	0.354539	A	B	A	A	A	B	B	A	-	A	-	A	A	B	A	B	A	A	A	-	B	A	A	B	B	A	A	A	A	B	A	B	B	A	B	B	A	A	-	B	B	A
Ps158090	41	8.9	Ps135693	Ps103403	Ps135693	Ps001516	0.745603	A	B	A	A	A	B	-	A	-	A	B	A	A	B	-	B	A	A	A	A	B	A	-	B	B	A	A	-	-	-	-	B	B	B	B	B	A	A	B	B	B	A
Ps142394	41	9.7	Ps135693	Ps103403	Ps135693	Ps001516	0.875896	A	B	-	A	A	B	B	A	-	-	B	A	A	B	A	B	A	A	-	A	B	A	A	B	B	A	A	A	A	B	-	B	B	B	B	-	A	A	B	B	B	A
Ps148370	41	11.4	Ps135693	Ps103403	Ps135693	Ps116813	0.75183	-	B	A	A	A	B	B	A	B	A	B	-	A	B	-	B	A	A	A	A	B	A	A	B	B	A	A	A	A	B	-	B	B	A	-	B	-	A	B	B	-	A
Ps158752	41	8.9	Ps135693	Ps103403	Ps135693	Ps001516	0.33039	A	B	A	A	A	-	B	A	B	A	-	A	A	B	A	B	-	A	A	-	B	A	A	B	B	-	A	A	A	B	A	B	B	A	-	-	A	-	-	B	B	A
Ps151908	41	9.1	Ps135693	Ps103403	Ps135693	Ps001516	0.342782	A	B	A	A	A	-	B	A	B	-	-	A	A	B	A	B	A	A	A	A	B	A	A	B	B	A	A	-	A	-	A	B	B	A	B	B	A	A	B	B	B	A
Ps100783	41.1	10.6	Ps135693	Ps103403	Ps135693	Ps001516	0.376344	A	B	A	A	A	B	B	A	B	A	B	A	A	-	A	B	A	A	A	A	B	A	A	B	B	A	A	A	A	B	A	B	-	A	B	B	A	A	B	B	B	A
Ps133982	41.1	10.3	Ps135693	Ps103403	Ps135693	Ps001516	0.757621	A	B	A	A	A	B	B	A	B	-	B	A	A	B	A	B	A	A	A	A	B	A	A	B	B	A	A	-	A	B	-	B	B	-	B	-	A	A	B	B	B	A
Ps147545	41.1	11.4	Ps135693	Ps103403	Ps135693	Ps001259	0.75183	-	B	A	A	A	B	B	A	B	A	B	-	A	B	A	B	A	-	A	A	B	A	A	B	B	A	A	A	A	B	A	B	B	-	B	B	-	A	B	-	B	A
Ps159717	41.1	9.1	Ps135693	Ps103403	Ps135693	Ps001516	0.516412	A	B	A	A	A	B	B	A	B	A	B	A	A	B	-	B	-	A	A	A	B	-	A	-	B	A	A	A	A	B	-	-	B	-	B	B	A	A	B	-	B	A
Ps157144	41.1	8.9	Ps135693	Ps103403	Ps135693	Ps001516	0.630954	A	B	-	A	A	B	B	A	B	A	B	A	A	B	A	B	A	A	A	A	-	A	-	B	B	A	A	A	-	B	B	B	-	A	-	-	A	A	B	B	B	A
Ps115875	41.1	10	Ps135693	Ps103403	Ps135693	Ps001516	0.285751	A	-	A	A	A	B	B	A	B	A	B	-	A	B	A	B	A	A	A	A	B	A	A	B	B	A	A	A	A	B	A	B	B	A	B	B	A	A	B	B	-	A
Ps130955	41.1	9.7	Ps135693	Ps103403	Ps135693	Ps001516	0.537094	A	B	A	A	A	B	B	A	B	A	-	A	A	B	-	B	A	A	A	A	B	A	A	B	B	A	A	A	A	B	B	B	B	A	-	B	A	A	B	-	B	A
Ps160340	41.1	8.6	Ps135693	Ps103403	Ps135693	Ps001516	0.745603	A	B	A	A	A	B	-	A	B	A	-	A	A	B	-	B	A	-	-	A	B	A	A	B	-	A	A	A	A	B	B	B	B	B	-	B	A	A	B	-	B	A
Ps153462	41.1	9.1	Ps135693	Ps103403	Ps135693	Ps001516	0.630954	A	B	A	A	A	B	B	A	B	A	-	A	-	-	A	B	-	A	A	-	B	A	A	B	B	A	A	A	A	B	-	B	B	-	B	B	A	A	B	B	B	A
Ps162987	41.1	8.3	Ps135693	Ps103403	Ps135693	Ps001516	0.182422	A	-	A	-	A	B	B	A	-	A	-	A	A	B	A	B	-	A	A	A	B	A	A	-	B	A	A	A	-	B	A	B	B	A	B	-	A	-	-	B	B	A
Ps127494	41.1	12	Ps135693	Ps103403	Ps135693	Ps001259	0.537094	-	B	A	A	-	B	B	A	B	A	B	A	A	B	A	B	A	A	A	A	B	A	A	B	B	A	A	A	A	B	A	B	B	-	-	B	A	A	B	B	B	A
Ps156829	41.5	9.4	Ps135693	Ps103403	Ps135693	Ps001516	0.87278	A	B	A	A	A	B	B	A	B	-	B	A	A	B	A	B	-	A	A	A	B	A	A	B	-	A	A	-	A	B	-	B	B	-	B	B	-	A	B	-	B	A
Ps154292	41.5	11.1	Ps135693	Ps103403	Ps135693	Ps116813	0.42334	-	-	A	A	A	B	-	A	B	A	B	A	A	B	A	B	-	A	A	A	B	A	A	B	B	A	A	A	A	B	-	B	B	-	-	B	A	A	-	B	B	A
Ps156840	41.5	8.9	Ps135693	Ps103403	Ps135693	Ps001516	0.149541	A	B	A	A	A	A	B	A	-	A	B	A	A	B	A	B	A	A	A	A	B	A	A	B	-	A	A	A	A	B	-	-	B	-	B	B	A	-	-	B	-	A
Ps139753	41.5	9.7	Ps135693	Ps103403	Ps135693	Ps001516	0.639412	A	B	A	A	A	B	B	A	-	-	B	A	A	B	A	-	A	A	A	A	B	A	A	B	B	A	A	-	A	B	A	B	B	A	B	B	-	-	B	B	B	A
Ps155682	41.5	9.1	Ps135693	Ps103403	Ps135693	Ps001516	0.42334	A	B	A	A	A	B	B	A	-	A	B	A	A	B	A	-	A	A	-	A	B	A	A	B	B	A	A	A	-	B	A	B	B	-	B	B	A	-	-	-	B	A
Ps117221	41.5	10.3	Ps135693	Ps103403	Ps135693	Ps001516	0.647315	A	B	A	A	A	B	B	A	B	A	B	A	A	B	A	B	A	A	A	-	B	A	A	B	B	A	A	A	A	B	A	B	B	A	B	B	A	-	B	B	-	A
Ps130641	41.5	10	Ps135693	Ps103403	Ps135693	Ps001516	0.757621	A	B	A	A	A	B	B	A	B	A	B	A	A	B	A	B	-	-	A	A	B	A	A	B	B	A	A	A	-	B	A	B	B	A	B	B	A	-	B	B	B	A
Ps102386	41.5	10.9	Ps135693	Ps103403	Ps135693	Ps001516	0.555346	A	B	A	A	A	B	B	A	B	A	B	A	A	-	A	B	A	A	A	A	B	A	A	B	B	A	A	A	A	B	-	B	B	A	B	B	A	A	B	B	B	A
Ps135301	41.5	9.7	Ps135693	Ps103403	Ps135693	Ps001516	0.875896	A	B	A	A	A	B	B	A	B	A	B	A	-	B	A	B	-	-	A	A	B	A	A	-	B	A	A	A	-	B	B	B	B	-	-	B	A	A	B	B	B	A
Ps128495	41.5	12.3	Ps135693	Ps103403	Ps135693	Ps116813	0.757621	-	B	-	A	A	B	B	A	B	A	B	A	A	-	A	B	A	A	A	A	B	A	A	B	B	A	A	A	A	B	-	B	B	-	B	B	A	A	B	B	B	A
Ps119962	41.5	10.3	Ps135693	Ps103403	Ps135693	Ps001516	0.285751	A	B	A	A	A	B	B	A	-	A	-	A	A	B	A	B	A	A	A	A	B	A	A	B	B	A	A	A	A	-	A	B	B	A	B	B	A	-	B	B	B	A
Ps122814	41.5	10.3	Ps135693	Ps103403	Ps135693	Ps001516	0.445766	A	-	A	A	A	B	B	A	B	A	B	A	A	B	A	B	A	A	A	A	B	A	A	B	B	A	A	A	A	B	-	B	-	A	B	B	-	A	B	B	B	A
Ps113201	41.5	10.6	Ps135693	Ps103403	Ps135693	Ps001516	0.763025	A	B	A	A	A	B	B	A	B	A	B	A	A	B	A	B	A	A	A	A	B	-	A	B	B	A	A	A	A	B	-	B	B	A	B	B	A	A	B	B	B	A
Ps150753	41.5	9.7	Ps135693	Ps103403	Ps135693	Ps001516	1	A	B	A	-	A	B	B	A	B	-	B	A	A	B	A	B	A	A	-	A	B	A	A	B	B	A	A	-	A	B	-	-	B	-	B	B	A	A	B	B	B	A
Ps144121	41.5	9.4	Ps135693	Ps103403	Ps135693	Ps001516	0.875896	A	B	A	A	A	B	-	A	B	-	B	A	A	B	A	B	A	A	A	A	B	A	-	B	-	A	A	-	A	B	B	B	B	A	B	B	A	A	B	B	B	A
Ps123038	41.5	10.3	Ps135693	Ps103403	Ps135693	Ps001516	0.647315	A	B	A	A	A	B	-	A	-	A	B	A	A	B	A	B	A	A	A	A	B	A	A	B	B	A	A	A	A	B	A	B	B	-	B	B	A	-	B	B	B	A
Ps115515	41.5	10.3	Ps135693	Ps103403	Ps135693	Ps001516	0.878794	A	B	A	A	A	B	B	A	B	A	B	A	A	B	A	B	-	A	A	A	B	A	A	B	B	A	A	A	-	B	-	B	B	A	B	B	A	A	B	B	B	A
Ps153179	41.5	9.4	Ps135693	Ps103403	Ps135693	Ps001516	0.149541	A	B	A	A	A	B	B	A	B	A	-	A	A	B	A	B	A	A	A	A	-	A	A	-	-	A	A	A	A	B	A	B	B	-	B	B	A	-	B	B	B	A
Ps141996	41.5	9.7	Ps135693	Ps103403	Ps135693	Ps001516	0.43488	A	-	A	A	A	B	B	A	-	A	B	A	A	-	A	-	A	A	A	A	B	A	A	B	B	A	A	A	A	B	B	B	B	A	B	B	-	A	B	B	B	A
Ps122282	41.5	10.6	Ps135693	Ps103403	Ps135693	Ps001516	0.647315	A	B	A	A	A	B	B	A	B	A	B	A	A	B	A	-	A	A	A	A	B	A	A	B	B	A	A	A	-	B	A	B	B	-	B	B	A	-	B	B	B	A
Ps163392	41.5	8	Ps135693	Ps103403	Ps135693	Ps001516	0.61209	A	-	A	A	-	B	B	A	B	-	B	A	A	B	A	B	A	A	A	-	B	A	A	-	B	A	-	A	-	-	B	B	B	-	B	B	A	-	B	B	-	A
Ps103403	42.1						0.881497	A	B	A	A	A	B	B	-	B	A	B	A	A	B	A	-	A	-	A	A	B	A	A	B	B	A	A	A	A	B	B	B	B	A	B	B	A	B	B	B	B	A
Ps148240	42.1	11.4	Ps135693	Ps103403	Ps135693	Ps001516	0.527089	A	B	A	A	A	-	-	A	B	A	-	A	A	B	A	B	-	-	A	A	B	A	A	B	B	A	A	A	A	B	-	B	B	A	B	B	A	-	B	B	B	A
Ps163664	42.1	9.6	Ps135693	Ps103403	Ps135693	Ps001516	0.865772	A	B	A	-	A	B	B	A	B	A	B	A	A	B	A	B	A	A	A	-	-	-	A	-	B	A	A	A	-	B	-	B	B	-	B	-	A	-	B	B	-	A
Ps133672	42.1	11.7	Ps135693	Ps103403	Ps135693	Ps001516	0.757621	A	B	A	A	A	B	B	A	B	A	B	A	-	B	A	B	A	A	A	A	B	A	A	B	B	A	A	A	A	B	-	B	B	A	B	B	A	-	B	B	B	-
Ps134068	42.1	11.7	Ps135693	Ps103403	Ps135693	Ps001516	0.537094	A	B	A	A	A	-	B	A	B	A	-	A	A	B	A	B	A	A	A	A	B	A	A	B	B	A	A	A	A	B	-	B	B	A	B	B	A	-	B	B	B	-
Ps124072	42.1	12	Ps135693	Ps103403	Ps135693	Ps001516	0.647315	A	B	A	A	A	-	B	A	B	A	B	A	A	B	A	B	A	A	A	A	B	A	A	B	B	A	A	A	A	B	-	B	B	-	B	B	A	-	B	B	B	A
Ps163393	42.1	10.2	Ps103403	Ps001516	Ps135693	Ps001516	0.865772	A	B	A	-	-	B	B	-	B	A	B	-	A	-	A	-	-	A	A	A	B	A	A	-	B	A	A	A	A	B	-	B	-	A	B	B	A	B	B	B	-	A
Ps152764	42.1	11.1	Ps135693	Ps103403	Ps135693	Ps001516	0.87278	A	-	A	A	A	B	B	A	B	A	B	A	-	B	A	B	-	-	A	A	B	A	A	B	B	A	A	A	A	B	B	B	B	-	B	B	A	-	-	B	B	A
Ps148725	42.1	11.1	Ps135693	Ps103403	Ps135693	Ps001516	0.75183	A	B	A	A	A	-	B	A	B	A	B	A	A	B	A	B	-	A	A	A	B	A	A	-	-	A	-	A	A	B	B	B	B	A	B	B	A	-	B	B	B	A
Ps139284	42.1	11.7	Ps135693	Ps103403	Ps135693	Ps001516	0.875896	A	B	A	A	A	-	B	A	B	A	B	A	A	B	A	-	-	A	A	-	B	A	A	B	B	A	A	A	A	B	B	B	B	A	B	B	A	-	B	B	B	A
Ps151039	42.1	11.4	Ps135693	Ps103403	Ps135693	Ps001516	0.75183	A	B	A	A	A	B	B	-	B	A	B	A	-	B	A	B	A	A	-	A	B	A	A	B	B	A	A	A	A	B	-	B	-	A	B	-	A	-	B	B	B	A
Ps121545	42.1	12	Ps103403	Ps001516	Ps135693	Ps001516	0.878794	A	B	A	A	A	B	B	A	B	A	B	A	A	B	A	B	A	A	A	-	B	A	A	B	B	A	A	-	A	B	-	B	B	-	B	B	A	B	B	B	B	A
Ps162963	42.1	10.2	Ps135693	Ps103403	Ps135693	Ps001516	1	A	B	A	A	A	-	B	A	B	A	B	-	-	B	A	B	A	-	A	A	-	-	A	B	B	A	A	A	A	B	-	B	B	-	B	B	A	-	B	B	-	A
Ps162669	42.1	9.9	Ps135693	Ps103403	Ps135693	Ps001516	0.738883	A	B	A	-	A	-	B	A	B	-	B	-	A	B	A	B	A	A	A	A	B	A	A	B	B	A	A	A	-	-	-	B	B	-	-	B	A	B	B	B	B	A
Ps121777	42.1	12	Ps135693	Ps103403	Ps135693	Ps001516	0.445766	A	B	A	A	A	B	B	A	-	A	B	A	A	B	A	B	A	A	A	A	B	A	A	B	B	A	A	A	A	B	-	-	B	A	B	B	A	-	B	-	B	A
Ps132208	42.6	10.3	Ps103403	Ps001516	Ps135693	Ps116813	0.537094	B	B	A	A	A	A	B	A	B	A	B	A	A	B	A	-	A	A	A	A	B	A	A	B	B	A	A	A	A	B	-	B	B	-	B	B	A	-	-	B	B	A
Ps001516	42.8						1	B	B	A	A	A	B	B	A	B	A	B	A	A	B	A	B	A	A	A	A	B	A	A	B	B	A	A	A	A	B	-	B	B	-	B	B	A	-	B	B	B	A
Ps132649	42.8	11.7	Ps103403	Ps001516	Ps135693	Ps001384	0.537094	B	B	-	A	A	B	B	A	B	A	B	A	A	B	A	B	A	A	A	A	B	A	A	B	-	A	A	A	A	-	A	B	B	-	B	B	A	A	B	-	B	A
Ps155590	42.8	11.4	Ps103403	Ps001516	Ps103403	Ps116813	0.87278	B	B	-	A	A	B	B	A	B	-	B	A	A	B	A	-	A	A	A	A	B	A	A	-	B	A	A	A	A	-	-	B	B	-	B	B	A	-	B	B	B	A
Ps117572	42.8	12.6	Ps001516	Ps116813	Ps103403	Ps116813	0.878794	B	B	A	A	-	B	B	A	B	A	B	A	A	B	A	B	A	A	A	A	B	A	A	B	B	A	A	A	A	B	-	B	B	B	B	B	A	-	B	B	B	A
Ps111384	42.8	12.6	Ps001516	Ps116813	Ps103403	Ps116813	0.546494	B	B	A	A	A	B	B	A	B	-	B	A	A	B	A	B	A	-	A	A	B	A	A	B	B	A	A	A	A	B	-	B	B	B	B	B	A	-	B	B	B	A
Ps123343	42.8	12.6	Ps001516	Ps116813	Ps103403	Ps116813	0.647315	B	B	A	A	A	-	B	A	B	A	B	A	A	B	A	B	A	A	A	A	B	A	A	B	B	A	A	A	A	B	-	B	B	-	B	-	A	A	B	B	B	A
Ps150424	42.8	11.4	Ps103403	Ps001516	Ps135693	Ps001259	0.75183	B	-	A	A	A	-	B	A	B	A	-	A	A	B	-	-	A	A	A	-	B	A	A	B	B	A	A	A	A	B	A	B	B	-	B	B	A	-	B	B	B	A
Ps147672	42.8	11.7	Ps103403	Ps001516	Ps103403	Ps001259	0.342782	B	B	A	-	A	B	B	-	B	-	B	A	A	B	-	B	A	A	A	A	B	A	A	B	B	-	A	A	A	B	-	B	B	-	B	B	A	-	B	B	B	A
Ps135650	42.8	11.7	Ps103403	Ps001516	Ps135693	Ps001259	0.639412	B	B	-	A	A	B	B	A	B	A	B	A	A	B	A	B	A	A	A	A	B	A	A	B	B	A	A	-	A	B	A	B	B	-	-	B	A	A	B	B	B	A
Ps151630	42.8	11.7	Ps103403	Ps001516	Ps103403	Ps116813	0.527089	B	B	A	A	A	-	B	A	B	A	B	A	A	B	A	B	A	A	A	A	B	A	A	B	B	A	A	A	A	B	-	B	B	A	B	B	A	-	-	B	B	A
Ps149120	42.8	11.4	Ps103403	Ps001516	Ps135693	Ps120105	0.205903	B	-	A	A	A	-	-	A	B	A	-	A	A	B	A	B	A	A	A	A	B	A	A	B	B	A	A	A	A	-	A	B	B	-	B	-	A	A	B	B	B	A
Ps113391	42.8	12.6	Ps001516	Ps116813	Ps103403	Ps116813	0.546494	B	B	A	A	A	-	B	A	B	A	B	A	A	B	A	B	A	A	A	A	B	A	A	B	B	A	A	A	A	-	-	B	B	A	B	B	A	A	B	B	B	A
Ps134842	42.8	11.7	Ps103403	Ps001516	Ps135693	Ps001259	0.354539	B	B	A	A	A	-	B	A	B	A	B	A	A	B	A	B	A	A	A	A	-	-	A	-	B	A	A	A	A	B	A	B	B	A	B	-	A	A	B	B	B	A
Ps151219	42.8	11.7	Ps001516	Ps116813	Ps103403	Ps116813	0.75183	B	B	A	A	-	-	B	A	B	A	-	A	A	B	A	B	A	A	A	A	B	A	A	B	B	A	A	A	A	B	-	B	-	-	B	B	-	A	B	B	B	A
Ps129094	42.8	12	Ps103403	Ps001516	Ps103403	Ps116813	0.757621	B	B	A	-	A	B	B	A	B	A	B	A	-	B	-	B	A	A	A	A	B	A	A	B	B	A	A	A	A	-	-	B	B	A	B	B	A	-	B	B	B	A
Ps130478	42.8	11.7	Ps103403	Ps001516	Ps135693	Ps001259	0.757621	B	B	A	A	A	-	B	-	B	A	-	A	A	B	A	B	A	A	A	A	B	A	A	B	B	A	A	-	A	B	A	B	B	A	B	-	A	-	B	B	B	A
Ps145482	42.8	11.4	Ps103403	Ps001516	Ps103403	Ps116813	1	B	B	A	-	A	B	B	A	B	A	B	A	A	B	-	B	A	A	A	A	B	A	A	B	-	A	A	A	A	B	B	B	-	-	B	B	A	-	B	-	B	A
Ps112764	42.8	12.3	Ps103403	Ps001516	Ps135693	Ps001259	0.365712	B	B	A	A	A	-	B	A	B	A	B	A	A	-	A	-	A	A	A	A	B	A	A	B	B	A	A	A	A	B	A	B	B	A	B	B	A	A	B	B	B	A
Ps156956	42.8	11.4	Ps103403	Ps001516	Ps103403	Ps001259	0.87278	B	B	A	A	A	B	B	A	B	A	B	A	A	B	A	B	A	A	-	A	B	A	A	B	B	-	A	A	A	-	-	B	-	A	B	B	-	-	B	B	B	A
Ps117091	42.8	12.3	Ps103403	Ps001516	Ps103403	Ps116813	0.878794	B	B	A	A	A	B	B	A	B	A	-	-	A	B	A	B	A	A	A	A	-	A	A	B	B	A	A	A	A	B	B	B	B	-	B	B	A	-	B	B	B	A
Ps154202	42.8	11.1	Ps103403	Ps001516	Ps135693	Ps001259	0.42334	B	B	A	A	A	B	B	-	B	A	B	A	A	B	A	B	A	A	A	A	B	A	A	-	B	A	A	A	A	B	A	B	B	-	B	-	-	A	-	B	-	A
Ps146099	42.8	11.1	Ps001516	Ps116813	Ps103403	Ps120105	0.527089	B	-	A	A	A	B	-	A	B	-	B	A	A	-	A	B	A	A	A	A	B	A	A	B	B	A	A	A	A	B	A	B	B	B	B	-	A	A	B	B	B	A
Ps100931	42.8	12.6	Ps103403	Ps001516	Ps135693	Ps001259	0.768083	B	B	A	A	A	B	B	A	B	A	B	A	A	B	A	B	A	A	A	A	B	A	A	B	B	A	A	A	A	B	A	B	B	A	B	B	A	A	B	B	-	A
Ps133043	42.8	12	Ps001516	Ps116813	Ps103403	Ps116813	0.757621	B	-	A	A	A	B	B	A	B	A	B	A	A	-	A	-	A	A	A	A	B	A	A	B	B	A	A	A	A	B	-	B	B	B	B	B	A	-	-	B	B	A
Ps134871	42.8	11.7	Ps001516	Ps116813	Ps103403	Ps116813	0.757621	B	B	A	A	A	B	B	A	B	A	B	A	A	B	A	-	A	A	A	A	B	-	A	B	B	A	-	-	-	B	B	B	B	A	B	B	A	A	B	B	B	A
Ps129434	42.8	11.7	Ps001516	Ps116813	Ps103403	Ps116813	0.757621	B	-	A	A	A	B	B	A	B	-	B	A	A	-	A	B	A	A	A	A	B	A	A	B	B	A	-	A	A	B	-	B	B	A	B	-	A	A	B	B	B	A
Ps151979	42.8	11.1	Ps001516	Ps116813	Ps103403	Ps001259	1	B	B	-	A	-	B	B	A	B	A	B	A	A	-	-	B	A	A	A	A	B	A	A	B	B	A	-	A	A	B	A	B	B	B	B	B	A	A	-	-	B	A
Ps141068	42.8	11.4	Ps001516	Ps116813	Ps103403	Ps116813	0.639412	B	B	A	A	A	B	B	A	B	A	B	A	A	B	A	-	A	-	A	A	B	A	A	B	B	A	A	A	A	-	B	B	B	-	B	-	A	A	B	B	-	A
Ps140913	42.8	12	Ps001516	Ps116813	Ps103403	Ps116813	0.639412	B	B	A	A	A	B	B	A	B	A	B	A	A	B	A	B	A	A	A	A	B	A	A	-	B	A	A	A	-	B	-	-	B	-	B	B	A	A	-	B	B	A
Ps140229	42.8	12	Ps103403	Ps001516	Ps103403	Ps116813	0.875896	B	B	A	A	A	B	B	A	B	A	B	A	A	-	-	B	A	-	A	A	B	A	A	B	B	A	A	A	A	-	-	B	B	A	B	B	A	-	B	B	B	A
Ps149648	42.8	11.4	Ps103403	Ps001516	Ps103403	Ps116813	1	B	B	A	A	-	-	B	A	B	A	B	A	A	B	A	B	A	A	-	-	B	A	A	B	B	A	A	A	A	B	B	B	B	-	-	B	A	-	B	B	B	A
Ps159887	42.8	11.1	Ps001516	Ps116813	Ps103403	Ps116813	0.745603	B	B	-	-	A	B	-	A	B	A	B	A	A	B	A	B	A	A	A	-	-	A	A	B	B	A	A	-	-	B	-	B	B	-	B	B	A	A	B	B	B	A
Ps141919	42.8	11.7	Ps103403	Ps001516	Ps103403	Ps116813	0.875896	B	B	A	A	A	B	-	A	B	A	B	A	A	B	A	-	A	A	A	A	B	-	A	-	B	A	A	A	-	B	-	B	B	B	B	B	A	-	B	B	B	A
Ps142664	42.8	11.7	Ps103403	Ps001516	Ps103403	Ps001259	0.639412	B	B	A	A	-	B	B	A	B	A	B	A	A	-	A	B	A	A	-	-	B	A	A	B	B	A	A	A	-	B	A	B	B	-	B	B	A	-	B	B	B	A
Ps150694	42.8	11.7	Ps103403	Ps001516	Ps135693	Ps116813	0.75183	-	B	A	A	A	B	-	A	B	A	B	A	A	B	A	B	-	A	A	A	B	A	A	B	B	A	-	A	A	B	-	B	B	B	B	B	A	-	B	B	B	A
Ps130272	42.8	12	Ps103403	Ps001516	Ps103403	Ps001259	1	B	B	A	A	A	-	B	A	B	A	B	A	A	B	A	B	A	A	A	A	B	A	A	B	B	A	A	A	A	B	A	B	B	B	B	-	-	-	B	B	B	A
Ps160114	42.8	11.1	Ps103403	Ps001516	Ps103403	Ps001259	0.516412	B	B	A	A	A	-	B	-	B	A	-	A	A	B	A	B	-	A	A	-	B	A	A	B	B	-	A	A	A	B	-	B	B	-	B	B	A	-	B	B	B	-
Ps116813	43.3						0.445766	B	B	A	A	A	B	B	A	B	A	B	A	A	B	A	B	A	A	A	A	B	A	A	B	B	B	-	-	A	B	B	B	B	-	B	B	A	-	B	B	-	A
Ps001391	43.3	22.9	Ps116813	Ps001259	Ps001516	Ps001259	0.445766	B	B	A	A	A	B	B	A	B	A	B	A	A	B	A	B	A	A	A	A	B	A	A	B	B	B	-	B	A	B	-	B	B	-	B	B	A	-	B	B	B	A
Ps001650	43.3	22.9	Ps116813	Ps001259	Ps001516	Ps001259	0.757621	B	B	A	A	A	B	B	A	B	A	B	A	A	B	A	B	A	A	A	A	B	A	A	B	-	B	A	-	A	B	-	B	B	-	B	B	A	-	B	B	B	A
Ps148902	43.3	11.4	Ps116813	Ps001259	Ps001516	Ps001259	0.75183	B	B	A	A	A	B	B	A	B	A	B	A	A	B	A	B	-	A	A	A	B	A	A	B	B	B	A	-	-	B	-	B	B	-	B	B	A	A	B	B	-	A
Ps123079	43.3	11.4	Ps116813	Ps001259	Ps001516	Ps001259	0.878794	B	B	A	A	A	-	B	A	B	A	B	A	A	B	A	B	A	A	A	A	B	A	A	B	-	B	A	B	A	B	-	-	B	A	B	B	A	A	B	B	B	A
Ps151248	43.3	11.1	Ps116813	Ps001259	Ps001516	Ps001259	0.527089	B	B	A	A	A	B	B	A	B	A	B	A	A	B	-	B	-	A	A	A	B	A	A	B	B	B	A	-	A	B	-	B	B	-	B	B	-	A	B	B	B	A
Ps146983	43.3	11.1	Ps001516	Ps116813	Ps001516	Ps001384	1	B	B	A	A	A	-	-	A	B	A	B	A	A	B	A	B	A	A	-	A	B	A	A	B	B	B	A	A	A	B	-	B	B	A	B	-	A	-	B	-	B	A
Ps151133	43.3	11.7	Ps116813	Ps001259	Ps103403	Ps001259	1	B	B	A	A	-	-	B	A	B	A	B	A	A	B	A	-	A	A	A	A	B	-	A	B	B	-	A	A	A	B	-	B	B	-	B	B	A	A	B	B	B	A
Ps112750	43.3	12	Ps116813	Ps001259	Ps001516	Ps001259	0.546494	B	B	A	A	A	B	B	A	B	A	B	A	A	B	A	B	A	A	A	A	B	A	A	B	B	B	A	B	-	B	B	B	B	-	B	B	A	A	B	B	B	A
Ps149526	43.3	11.1	Ps116813	Ps001259	Ps001516	Ps001259	1	B	B	A	A	A	B	B	A	B	A	B	A	A	B	A	B	-	A	A	A	B	A	A	B	B	B	A	A	A	B	-	B	-	-	B	-	A	-	-	B	B	A
Ps162295	43.3	9.9	Ps116813	Ps001259	Ps001516	Ps120105	0.869417	-	B	A	A	-	-	B	A	B	A	-	A	A	B	A	-	A	A	A	A	B	A	A	B	B	B	A	B	-	B	-	B	B	-	B	B	A	A	B	B	B	A
Ps153695	43.3	10.5	Ps001516	Ps116813	Ps001516	Ps001259	0.87278	B	B	A	-	A	B	B	A	B	A	-	A	A	B	A	B	A	A	-	A	B	A	A	B	B	B	A	B	A	B	-	B	-	A	-	B	A	-	-	B	B	A
Ps162641	43.3	10.2	Ps001516	Ps116813	Ps001516	Ps001384	0.738883	-	B	A	A	A	B	-	A	B	-	-	A	-	-	A	B	A	-	A	A	B	A	A	-	B	B	A	A	A	B	-	B	B	A	B	B	A	-	B	B	-	A
Ps151539	43.3	11.1	Ps116813	Ps001259	Ps001516	Ps001259	0.75183	B	B	A	-	A	B	B	A	B	A	-	A	A	-	A	B	A	A	-	A	B	A	A	B	B	B	A	-	A	B	-	B	B	-	B	-	A	A	B	B	B	A
Ps158988	43.3	10.8	Ps116813	Ps001259	Ps001516	Ps001259	1	B	B	A	A	A	B	B	A	B	-	B	A	A	B	A	B	A	A	A	A	B	-	A	B	B	B	A	-	A	B	-	B	B	A	B	-	A	-	-	-	-	A
Ps143434	43.3	10.8	Ps116813	Ps001259	Ps001516	Ps001259	0.274299	B	B	A	A	A	B	B	A	B	A	B	A	A	B	-	B	A	A	A	A	B	-	-	B	B	B	A	B	A	B	B	B	B	A	B	B	A	A	B	B	B	A
Ps145383	43.3	10.8	Ps116813	Ps001259	Ps103403	Ps001259	0.75183	B	B	A	-	A	B	B	A	B	A	-	A	A	B	A	B	A	A	A	A	B	A	-	B	B	-	A	B	-	-	B	B	B	A	B	B	A	A	B	B	-	A
Ps159011	43.3	10.8	Ps116813	Ps001259	Ps001516	Ps001259	0.745603	-	B	A	A	A	B	B	A	B	A	B	A	A	B	A	B	A	-	A	A	B	A	A	B	B	B	A	-	A	B	-	B	B	-	B	B	A	-	-	B	B	A
Ps144485	43.3	11.4	Ps001516	Ps116813	Ps001516	Ps001259	0.43488	B	B	A	-	A	B	B	A	B	A	B	A	A	B	A	B	A	A	A	A	B	A	A	B	B	B	A	B	-	B	-	B	B	-	B	B	A	-	-	B	B	A
Ps148465	43.3	11.1	Ps001516	Ps116813	Ps001516	Ps001259	0.75183	B	-	A	A	A	B	B	A	B	A	-	A	A	B	A	B	A	A	A	-	B	A	A	B	B	B	A	B	A	B	-	-	B	-	B	B	A	-	B	-	B	A
Ps157957	43.3	10.5	Ps116813	Ps001259	Ps001516	Ps120105	0.745603	B	B	A	-	-	B	B	A	B	A	B	A	A	B	A	B	A	A	A	A	-	A	A	-	B	B	A	B	-	-	-	B	B	-	B	B	A	A	B	B	-	A
Ps123758	43.3	11.7	Ps116813	Ps001259	Ps001516	Ps001259	0.878794	B	B	A	A	A	-	B	A	B	A	B	A	A	B	A	B	A	A	A	A	B	A	A	B	B	B	A	-	-	B	-	B	B	A	B	B	A	A	B	B	B	A
Ps153474	43.3	10.8	Ps116813	Ps001259	Ps001516	Ps001259	0.87278	B	B	A	A	A	B	B	A	B	-	B	A	A	B	A	B	A	A	A	A	B	-	A	B	-	B	A	B	A	-	-	B	B	-	B	B	A	A	B	-	-	A
Ps157684	43.3	10.8	Ps001516	Ps116813	Ps001516	Ps001259	0.33039	B	B	A	A	A	B	B	A	B	A	B	A	-	B	A	B	A	A	-	-	B	A	A	B	B	B	A	-	A	-	B	B	-	A	B	B	-	-	B	B	-	A
Ps120499	43.3	11.7	Ps001516	Ps116813	Ps001516	Ps001259	0.878794	B	B	A	A	A	B	B	A	B	A	B	A	A	B	A	B	A	A	A	A	B	A	A	B	B	B	A	B	A	B	-	-	B	A	B	B	A	-	-	B	B	A
Ps143616	43.3	11.4	Ps116813	Ps001259	Ps001516	Ps001259	0.639412	B	B	A	A	A	B	B	A	B	A	B	A	A	B	A	B	A	A	A	A	B	A	A	B	B	B	A	A	A	B	-	B	-	-	B	-	A	A	B	B	-	A
Ps161510	43.3	10.8	Ps001516	Ps116813	Ps001516	Ps001259	0.869417	B	-	A	A	A	B	B	A	B	A	B	A	A	-	A	B	A	A	A	A	B	A	-	B	B	B	A	-	-	B	B	B	B	-	B	B	A	-	-	-	-	A
Ps152007	43.3	10.8	Ps116813	Ps001259	Ps001516	Ps001259	0.75183	-	B	A	A	A	B	B	A	B	A	B	A	A	B	-	B	A	A	A	A	-	A	A	B	-	B	A	B	A	B	-	B	B	-	B	B	-	A	B	B	B	A
Ps144188	43.3	11.1	Ps116813	Ps001259	Ps001516	Ps001259	0.639412	B	B	A	A	-	-	B	A	B	A	B	A	A	B	A	B	A	A	A	-	B	A	A	B	B	B	A	B	A	B	-	-	B	-	B	B	A	A	B	B	B	A
Ps163333	43.3	9.6	Ps116813	Ps001259	Ps001516	Ps001259	1	B	B	A	A	A	-	B	A	B	A	B	A	-	-	A	B	-	A	A	A	B	A	A	-	-	B	A	B	A	B	-	B	B	B	B	B	A	A	B	B	-	A
Ps150870	43.3	11.4	Ps116813	Ps001259	Ps001516	Ps001259	0.342782	B	B	-	A	A	B	B	A	B	A	B	A	A	B	A	-	A	A	A	-	B	A	A	B	B	B	A	-	A	B	-	B	B	-	B	B	A	-	B	B	B	A
Ps124777	43.3	11.4	Ps116813	Ps001259	Ps001516	Ps001259	0.354539	B	B	A	A	A	B	B	A	B	-	B	A	A	B	A	B	-	A	A	A	B	A	A	B	B	B	A	A	-	B	-	B	B	B	-	B	A	-	B	B	B	A
Ps142629	43.3	10.8	Ps116813	Ps001259	Ps001516	Ps120105	0.43488	B	B	A	A	A	B	B	-	B	A	B	A	A	B	-	B	A	A	A	A	B	A	A	B	-	B	A	B	-	B	-	B	B	A	B	-	A	A	B	B	B	A
Ps133528	43.3	11.1	Ps116813	Ps001259	Ps001516	Ps001259	0.537094	B	B	A	A	A	-	B	A	B	A	B	A	A	-	-	B	A	A	A	A	B	A	A	B	B	B	A	B	A	B	-	B	B	B	B	B	A	A	B	B	B	A
Ps160570	43.3	9.9	Ps116813	Ps001259	Ps001516	Ps120105	0.621873	-	B	A	A	-	B	B	A	B	A	-	A	A	B	A	B	-	A	A	A	B	A	A	B	B	B	A	B	-	B	-	B	B	-	-	B	-	A	B	B	B	A
Ps140875	43.3	11.1	Ps116813	Ps001259	Ps001516	Ps120105	0.639412	B	B	A	A	A	B	B	A	B	A	B	-	A	B	A	B	A	A	A	A	B	A	A	B	B	B	A	B	-	B	-	-	B	-	-	B	A	A	B	B	B	A
Ps131418	43.5	9.4	Ps116813	Ps001259	Ps001516	Ps120105	1	B	B	-	A	A	A	B	A	B	A	B	A	A	B	A	B	A	A	A	A	B	A	A	B	B	B	A	-	-	B	-	B	B	A	B	B	A	A	-	B	B	A
Ps144531	43.6	9.4	Ps116813	Ps001259	Ps116813	Ps001384	0.875896	B	B	A	A	A	-	B	A	B	A	B	A	A	B	A	B	-	-	A	A	B	A	A	-	B	B	A	B	A	B	A	B	B	A	B	B	A	-	B	B	-	A
Ps124809	43.6	10	Ps116813	Ps001259	Ps001516	Ps001384	0.757621	B	B	A	A	A	B	B	A	B	A	B	A	A	B	A	B	A	A	A	A	B	A	A	B	B	B	A	A	A	B	-	B	B	-	-	B	A	A	-	B	-	A
Ps146743	43.6	11.4	Ps116813	Ps001259	Ps103403	Ps001384	1	B	B	A	A	A	B	B	A	B	A	B	A	A	B	A	-	A	A	A	A	B	-	A	-	B	-	A	A	A	B	A	B	B	-	B	B	A	A	B	B	B	-
Ps145983	43.6	8.9	Ps116813	Ps001259	Ps116813	Ps001384	0.75183	B	B	A	A	A	-	B	A	B	A	B	A	A	B	-	B	A	-	-	A	B	A	A	B	-	B	A	B	A	-	A	B	B	A	-	B	A	-	B	B	B	A
Ps149730	43.6	9.1	Ps116813	Ps001259	Ps001516	Ps120105	0.75183	B	B	A	A	A	B	B	A	B	A	B	-	A	-	A	-	A	A	A	A	B	A	A	-	B	B	A	A	-	B	-	B	B	A	B	B	A	A	B	B	B	A
Ps153840	43.6	8.9	Ps116813	Ps001259	Ps116813	Ps001384	0.630954	B	B	A	A	-	B	B	A	B	-	B	A	A	B	A	B	-	A	A	A	B	A	A	B	B	B	A	B	A	B	A	B	B	-	-	B	-	A	B	-	-	A
Ps159687	43.6	10.8	Ps116813	Ps001259	Ps103403	Ps001384	1	B	B	-	A	A	-	B	A	B	A	-	A	A	B	A	B	A	-	A	A	B	A	A	B	B	-	A	-	A	B	A	B	B	-	B	-	A	A	B	B	B	A
Ps154325	43.6	9.1	Ps116813	Ps001259	Ps001516	Ps001384	0.87278	B	B	A	A	A	B	B	A	B	A	B	A	A	-	-	-	A	A	-	A	B	A	A	B	B	B	A	-	A	B	-	B	B	-	B	B	-	A	B	B	B	A
Ps151405	43.6	11.7	Ps116813	Ps001259	Ps103403	Ps001259	1	B	B	A	A	A	B	B	A	B	A	B	-	A	B	A	B	A	A	A	A	B	A	A	B	B	-	A	-	A	B	A	B	B	-	B	B	A	-	-	B	B	A
Ps137438	43.7	9.7	Ps116813	Ps001259	Ps116813	Ps001384	0.875896	B	B	A	A	A	B	B	A	B	A	B	A	A	B	A	B	A	-	A	A	B	A	A	-	-	B	-	-	A	B	A	B	B	-	B	B	A	-	B	B	B	A
Ps001259	43.9						0.878794	B	B	A	A	A	B	A	A	B	A	B	A	A	B	A	B	A	A	A	A	B	A	A	B	B	B	A	-	A	B	-	B	B	-	B	B	A	-	B	B	B	A
Ps162115	43.9	10.8	Ps001259	Ps001384	Ps116813	Ps001384	0.869417	-	B	A	A	A	B	A	A	-	-	-	-	A	B	A	B	A	A	A	A	B	A	-	B	B	B	A	B	A	-	-	B	B	-	B	B	A	-	B	B	B	A
Ps113976	43.9	12	Ps001259	Ps001384	Ps116813	Ps120105	1	B	B	A	A	A	B	A	A	B	A	B	A	A	B	A	B	A	A	A	A	B	A	A	B	B	B	-	A	A	B	A	B	B	A	B	B	A	A	B	B	B	-
Ps142942	43.9	11.7	Ps001259	Ps001384	Ps001516	Ps001384	0.639412	B	B	A	A	A	B	-	A	B	A	-	A	A	B	A	B	A	A	A	A	B	A	A	B	B	B	A	B	A	B	B	B	B	-	B	B	A	-	B	-	B	A
Ps128187	43.9	11.4	Ps001259	Ps001384	Ps116813	Ps120105	1	B	B	A	A	A	-	A	A	B	A	B	A	A	B	A	B	A	A	A	-	B	A	A	B	B	-	A	-	A	B	A	B	B	B	B	B	-	B	-	B	B	A
Ps113657	43.9	12.3	Ps001259	Ps001384	Ps116813	Ps001384	0.365712	B	B	A	A	A	B	A	A	B	A	B	A	-	B	A	B	A	A	A	A	B	A	-	B	B	B	A	B	A	B	B	B	B	B	B	B	A	-	B	B	B	A
Ps137926	43.9	11.4	Ps001259	Ps001384	Ps116813	Ps120105	0.875896	B	-	A	A	-	B	A	A	B	A	B	A	A	-	A	B	A	A	-	A	B	A	A	B	B	B	A	B	A	B	B	B	B	-	B	B	A	-	-	B	B	A
Ps137089	43.9	11.4	Ps001259	Ps001384	Ps116813	Ps120105	0.875896	B	B	A	A	A	-	A	A	B	A	B	A	A	B	A	B	A	A	A	A	-	A	A	B	B	-	A	B	A	B	-	B	B	B	B	-	A	A	B	B	B	-
Ps142356	43.9	11.4	Ps001259	Ps001384	Ps116813	Ps120105	0.875896	B	B	A	A	-	B	A	A	B	A	-	A	A	B	A	B	A	A	A	A	B	A	-	B	B	B	A	B	A	B	-	B	B	A	B	-	A	A	B	B	B	A
Ps136968	43.9	11.4	Ps001259	Ps001384	Ps116813	Ps120105	0.875896	B	B	A	A	A	B	A	A	B	A	-	-	A	B	A	B	A	A	A	A	-	A	A	B	B	B	A	B	A	B	A	B	B	-	B	B	A	A	-	B	B	-
Ps156024	43.9	11.1	Ps001259	Ps001384	Ps116813	Ps001384	0.630954	B	B	A	A	A	-	A	A	B	A	B	-	A	B	A	B	A	A	A	A	B	A	A	B	B	B	A	B	A	B	-	-	B	-	B	B	A	A	-	B	-	A
Ps126616	43.9	11.7	Ps001259	Ps001384	Ps116813	Ps120105	0.537094	B	-	A	A	-	B	A	A	B	-	B	A	A	B	A	B	-	A	A	A	B	A	A	B	B	B	A	B	A	B	A	B	B	B	B	B	A	-	B	B	B	A
Ps143342	43.9	12.3	Ps001259	Ps001384	Ps116813	Ps001384	0.639412	B	B	-	A	A	B	A	A	B	A	B	A	A	B	A	B	A	A	A	A	B	A	A	B	B	B	A	-	A	B	-	B	B	-	B	B	A	-	B	B	B	A
Ps108570	43.9	12.3	Ps001259	Ps001384	Ps116813	Ps120105	1	B	B	A	A	A	B	A	-	B	-	B	A	A	B	A	B	A	A	A	A	B	A	A	B	B	B	A	-	A	B	A	B	B	A	B	B	A	A	B	B	B	A
Ps143083	43.9	12	Ps001259	Ps001384	Ps116813	Ps001384	0.875896	B	B	A	A	A	B	A	A	B	A	B	-	A	B	A	B	A	A	A	A	B	A	A	B	B	B	A	-	A	B	-	B	B	-	-	-	A	A	B	B	B	A
Ps160814	43.9	9.9	Ps001259	Ps001384	Ps116813	Ps120105	0.869417	B	-	A	A	A	-	A	A	B	-	B	-	A	-	A	B	A	A	A	A	B	A	-	-	B	B	A	B	A	-	A	B	B	-	B	B	A	A	B	B	B	-
Ps139141	43.9	11.4	Ps001259	Ps001384	Ps116813	Ps001384	0.639412	B	B	-	A	A	B	A	A	B	A	-	A	A	B	A	B	A	A	A	A	B	A	A	B	B	B	A	B	A	-	B	B	B	-	B	-	A	B	B	B	B	A
Ps112715	43.9	12.9	Ps001259	Ps001384	Ps116813	Ps001384	1	B	B	A	A	A	B	A	A	B	A	B	A	A	B	A	B	A	A	A	A	B	A	A	B	B	B	A	-	A	B	A	B	B	-	B	B	A	-	B	B	B	A
Ps136464	43.9	11.7	Ps001259	Ps001384	Ps116813	Ps001384	0.43488	B	B	A	A	A	B	A	A	B	A	B	A	-	B	A	B	-	A	A	-	B	A	A	B	B	B	A	B	A	B	-	B	B	-	B	-	A	-	B	B	B	A
Ps137720	43.9	11.4	Ps001259	Ps001384	Ps001516	Ps001384	0.875896	B	B	A	-	A	B	-	A	B	A	B	A	A	B	-	B	A	A	A	A	B	A	A	B	B	B	A	A	A	B	-	B	B	A	B	-	A	A	B	B	B	A
Ps147919	43.9	11.1	Ps001259	Ps001384	Ps116813	Ps120105	0.527089	B	B	A	-	A	B	A	-	B	A	B	A	A	B	-	B	A	A	A	A	B	-	A	B	-	B	A	B	A	B	A	B	B	-	-	B	A	-	B	B	B	A
Ps117635	43.9	12	Ps001259	Ps001384	Ps116813	Ps001384	0.878794	B	B	A	A	A	B	A	A	B	A	B	A	A	B	A	B	A	A	A	A	B	-	A	B	-	B	A	-	A	B	B	B	B	A	B	B	A	A	-	B	B	A
Ps141325	43.9	11.4	Ps001259	Ps001384	Ps116813	Ps001384	0.639412	B	B	A	A	A	-	A	-	B	A	B	A	A	B	A	B	A	A	A	A	B	A	A	B	B	B	A	-	A	B	B	B	-	A	B	B	A	A	-	-	B	A
Ps144280	43.9	11.7	Ps001259	Ps001384	Ps116813	Ps001384	0.875896	B	B	A	A	A	B	A	-	B	A	B	A	A	B	A	B	A	-	A	A	B	A	A	B	B	B	A	-	A	B	B	B	B	-	B	B	A	A	B	-	-	A
Ps116546	44.5	10.3	Ps001259	Ps001384	Ps116813	Ps120105	0.647315	B	B	A	A	A	A	A	A	B	A	B	A	A	-	A	B	A	A	A	A	B	A	A	B	B	B	A	-	A	B	-	B	B	B	B	B	A	A	B	B	B	A
Ps001384	45.7						0.527089	B	B	A	A	A	B	A	A	B	A	B	A	A	B	A	B	A	-	A	A	B	A	A	B	-	B	-	-	B	B	-	B	B	-	B	B	A	-	B	B	B	A
Ps142414	45.7	11.1	Ps001384	Ps120105	Ps116813	Ps120105	0.875896	B	B	A	A	A	B	A	A	B	A	B	A	A	B	A	B	-	-	A	A	-	A	A	B	B	B	A	B	-	B	A	B	B	A	B	B	-	A	B	-	B	A
Ps153599	45.7	10.8	Ps001384	Ps120105	Ps116813	Ps120105	0.630954	-	B	A	A	A	B	A	A	B	-	B	A	A	B	A	-	-	A	A	A	B	A	A	B	B	B	A	-	-	B	A	B	B	B	B	B	A	B	B	B	-	A
Ps154884	45.7	9.9	Ps001384	Ps120105	Ps001259	Ps120105	0.87278	B	B	A	A	A	-	A	A	B	A	-	A	A	B	A	B	A	B	A	A	B	A	A	B	B	B	-	B	B	B	A	B	B	-	B	-	-	A	-	B	B	A
Ps161870	45.7	9.3	Ps001384	Ps120105	Ps001259	Ps120105	0.621873	B	B	A	A	A	-	A	A	B	-	B	-	A	B	A	B	A	B	A	-	B	A	A	-	B	B	A	B	B	B	-	B	B	A	B	-	-	A	-	B	B	A
Ps150669	45.7	11.1	Ps001384	Ps120105	Ps001259	Ps120105	0.527089	B	B	A	A	A	B	A	A	B	A	B	A	A	B	A	B	A	-	A	A	B	A	A	B	B	B	A	-	B	-	-	B	B	B	B	-	A	-	B	B	B	A
Ps158131	45.7	9.9	Ps001384	Ps120105	Ps001259	Ps120105	0.745603	B	B	-	A	A	-	A	A	B	A	B	A	A	B	A	B	A	B	A	A	-	A	-	B	B	B	A	B	B	B	-	B	B	A	B	-	A	-	B	B	B	A
Ps150495	45.7	10.8	Ps001384	Ps120105	Ps001259	Ps120105	0.75183	B	B	A	A	A	B	A	A	B	A	B	A	A	B	A	B	-	B	A	A	B	A	A	B	B	-	A	-	B	-	A	B	-	-	B	B	A	-	B	B	B	A
Ps121264	45.7	11.7	Ps001384	Ps120105	Ps001259	Ps120105	0.445766	B	B	A	A	A	B	-	A	B	A	B	A	A	B	A	B	A	-	A	A	B	A	A	B	B	B	A	B	B	B	-	B	B	-	B	B	A	A	B	B	B	A
Ps143915	45.7	10.5	Ps001384	Ps120105	Ps001259	Ps120105	0.875896	B	B	A	A	A	-	A	A	B	A	B	A	A	B	A	-	A	A	-	A	B	A	A	B	B	B	A	B	B	-	-	B	B	A	B	B	A	A	B	B	B	A
Ps142083	45.7	11.4	Ps001259	Ps001384	Ps001259	Ps120105	0.639412	B	B	A	A	A	B	A	A	B	A	B	A	A	-	A	B	A	-	A	A	B	A	A	B	B	B	A	-	B	B	B	B	B	-	B	B	A	-	B	-	B	A
Ps133052	45.7	11.4	Ps001384	Ps120105	Ps001259	Ps120105	0.757621	B	-	A	A	A	B	A	A	B	A	B	A	A	B	A	B	A	-	A	A	B	A	A	B	B	B	A	-	B	B	-	B	B	-	B	-	A	A	B	B	B	A
Ps157061	45.7	10.5	Ps001384	Ps120105	Ps116813	Ps120105	0.630954	B	-	A	-	A	B	A	A	B	A	-	A	A	B	A	B	A	B	A	A	B	A	A	B	B	B	A	-	-	B	A	B	B	-	B	B	A	-	B	B	B	-
Ps132461	45.7	11.1	Ps001384	Ps120105	Ps001259	Ps120105	0.757621	B	B	A	A	A	B	A	A	B	A	B	A	A	B	A	B	A	-	A	A	B	A	-	B	B	B	A	B	B	B	-	B	B	A	-	B	A	-	B	-	B	A
Ps162253	45.7	10.5	Ps001384	Ps120105	Ps116813	Ps120105	0.869417	B	B	-	-	A	-	A	A	B	A	-	A	A	B	-	B	A	A	A	A	B	A	A	-	B	B	A	B	-	B	-	B	B	A	B	-	A	-	B	B	B	A
Ps148560	45.7	11.7	Ps001384	Ps120105	Ps116813	Ps120105	0.75183	B	B	A	A	A	-	A	A	B	A	B	A	A	B	A	B	A	A	A	A	B	-	A	B	B	B	A	B	-	B	-	B	B	-	B	B	A	-	B	-	B	A
Ps127307	45.7	10.8	Ps001384	Ps120105	Ps001259	Ps120105	0.354539	B	B	A	A	A	B	A	A	B	A	B	A	A	B	A	B	A	B	A	-	-	A	A	B	B	B	A	-	B	B	-	B	B	B	B	-	A	A	B	B	B	A
Ps130647	45.7	11.7	Ps001384	Ps120105	Ps116813	Ps120105	0.537094	B	B	A	-	A	B	A	A	B	A	B	A	A	-	A	-	A	A	A	A	B	A	A	B	B	B	A	B	-	B	-	B	B	B	B	B	A	-	B	B	B	A
Ps151314	45.7	11.1	Ps001259	Ps001384	Ps001259	Ps120105	1	B	-	A	A	A	B	A	A	B	A	-	A	A	B	A	B	A	-	A	A	B	A	A	B	B	B	A	-	B	B	-	B	B	A	-	B	A	-	B	B	B	A
Ps159677	45.7	9.9	Ps001384	Ps120105	Ps001259	Ps120105	0.516412	B	B	A	A	A	B	-	A	B	-	B	A	A	-	A	B	A	A	-	-	B	A	A	B	B	B	A	-	B	B	-	B	B	B	-	B	A	-	B	B	B	A
Ps153164	45.7	10.5	Ps001384	Ps120105	Ps001259	Ps120105	0.87278	B	B	A	A	A	B	A	A	B	A	B	A	-	B	A	-	A	A	A	A	B	A	-	B	B	B	-	-	B	-	A	-	B	-	B	B	A	A	B	B	B	A
Ps152258	45.7	9.9	Ps001384	Ps120105	Ps001259	Ps120105	0.87278	B	-	A	A	-	B	A	-	B	A	B	A	A	B	A	B	-	-	A	A	B	A	A	B	B	B	A	A	B	-	A	B	B	A	B	B	-	-	B	B	B	A
Ps143850	45.7	11.1	Ps001259	Ps001384	Ps001259	Ps120105	0.875896	B	B	A	A	A	B	A	A	B	A	B	A	A	B	A	B	A	-	A	A	B	A	-	B	B	B	A	A	B	B	-	B	-	-	-	B	A	A	B	B	B	A
Ps120829	45.7	11.1	Ps001384	Ps120105	Ps001259	Ps120105	0.878794	-	B	A	A	A	-	A	A	B	A	B	A	A	B	A	B	A	-	A	A	B	A	A	B	B	B	A	B	B	B	A	-	B	A	B	B	A	A	B	B	B	A
Ps141804	46.3	8.9	Ps001384	Ps120105	Ps001259	Ps120105	0.875896	B	B	A	A	A	A	A	A	-	-	B	A	A	B	A	B	A	B	A	A	B	A	A	B	B	B	A	B	B	B	-	B	B	A	B	-	A	-	B	B	B	A
Ps144291	46.4	8.6	Ps001384	Ps120105	Ps001259	Ps120105	0.875896	B	B	A	A	A	A	A	-	B	A	B	A	A	-	A	B	A	-	A	-	-	A	A	B	B	B	A	A	B	B	A	B	B	B	B	B	A	A	B	B	-	A
Ps139335	46.6	9.1	Ps001384	Ps120105	Ps116813	Ps120105	0.639412	B	B	A	A	A	A	-	A	B	A	B	A	A	B	A	B	A	-	A	A	B	A	A	B	B	B	A	B	-	B	A	B	B	-	B	-	-	A	B	B	B	-
Ps136843	46.6	9.4	Ps001384	Ps120105	Ps116813	Ps120105	0.274299	B	B	A	A	A	A	A	A	B	A	-	A	A	B	A	-	A	A	A	A	B	A	A	B	B	B	A	-	-	B	A	B	B	A	-	B	A	A	-	B	B	A
Ps115819	46.6	9.4	Ps001384	Ps120105	Ps001259	Ps120105	0.445766	B	B	A	A	A	B	A	A	B	-	B	-	A	B	A	B	A	-	A	A	B	A	A	B	B	B	A	B	-	B	A	B	B	A	B	B	A	B	B	B	B	A
Ps144299	46.9	8.9	Ps001384	Ps120105	Ps001384	Ps120105	0.43488	B	B	A	A	A	B	A	A	B	-	-	A	A	B	A	B	A	-	-	A	B	-	A	B	B	B	A	-	B	B	A	B	B	-	B	B	A	A	B	B	B	A
Ps125812	46.9	8.9	Ps001384	Ps120105	Ps001384	Ps120105	0.537094	B	B	A	A	A	B	A	A	B	-	-	A	A	-	A	B	A	-	A	A	B	A	A	B	B	B	A	B	B	B	B	B	B	A	B	B	A	A	B	B	B	A
Ps139494	46.9	8.6	Ps001384	Ps120105	Ps001384	Ps120105	0.274299	B	B	A	A	-	B	A	A	B	A	B	A	A	B	A	B	-	A	A	A	B	-	A	B	B	-	A	B	B	B	B	B	B	-	B	B	A	A	B	B	B	A
Ps159544	46.9	8	Ps001384	Ps120105	Ps001384	Ps120105	1	B	B	A	A	A	-	A	A	B	A	B	A	A	-	-	B	A	A	A	A	B	A	A	-	B	B	A	-	B	B	A	B	B	B	B	-	A	-	-	B	-	A
Ps159373	46.9	8.6	Ps001384	Ps120105	Ps001384	Ps120105	0.516412	B	B	A	A	A	-	A	A	B	A	B	A	A	B	A	B	A	-	-	A	B	A	A	B	B	B	A	B	-	-	-	-	B	-	B	B	-	A	B	B	B	-
Ps105397	46.9	9.7	Ps001384	Ps120105	Ps001384	Ps120105	0.456057	B	B	A	A	A	B	A	A	B	A	B	A	A	B	A	B	A	B	A	A	B	A	A	-	B	B	A	-	B	B	A	B	B	A	B	B	A	-	B	B	B	A
Ps136573	46.9	9.1	Ps001384	Ps120105	Ps001384	Ps120105	0.639412	B	B	A	A	A	-	A	A	B	A	B	A	A	B	A	B	A	B	A	A	B	A	A	B	B	B	-	-	B	-	-	B	B	A	B	B	A	A	-	B	B	A
Ps155984	46.9	8.3	Ps001384	Ps120105	Ps001384	Ps120105	0.149541	B	B	-	A	A	B	A	A	B	-	B	A	A	B	A	-	-	A	A	A	B	A	A	B	B	B	-	-	B	B	-	B	B	B	B	B	-	A	-	B	B	A
Ps147524	46.9	8.6	Ps001384	Ps120105	Ps001384	Ps001177	0.342782	B	B	A	A	A	B	A	A	B	A	B	A	A	B	A	B	A	B	A	-	B	A	-	B	B	B	A	B	B	-	-	B	A	-	B	B	A	B	B	-	B	A
Ps161137	46.9	8.6	Ps001384	Ps120105	Ps001384	Ps120105	0.249817	B	B	A	A	A	B	A	A	-	-	B	-	A	B	-	B	A	-	A	A	B	A	A	B	-	B	-	-	B	B	-	B	B	B	-	B	A	A	B	B	B	A
Ps162716	47.5	7.4	Ps001384	Ps120105	Ps001384	Ps001177	0.504985	-	-	A	A	A	B	A	A	-	A	B	-	A	B	A	B	A	B	A	-	B	A	A	B	B	B	A	B	B	B	-	B	-	A	B	B	-	-	-	B	-	A
Ps149045	47.5	8.9	Ps001384	Ps120105	Ps001384	Ps120105	0.527089	B	B	A	A	A	B	A	-	B	A	-	A	-	-	A	B	A	-	A	A	B	A	A	B	B	B	A	-	B	B	A	B	B	-	B	B	A	A	B	B	B	A
Ps154398	47.5	8.3	Ps001384	Ps120105	Ps001384	Ps120105	0.87278	B	-	A	A	A	B	A	A	B	A	B	A	A	B	A	B	A	-	A	-	B	A	A	-	-	B	A	B	B	B	A	B	B	A	B	B	A	-	B	-	-	A
Ps120105	49.3						0.445766	B	B	A	-	-	B	A	A	B	A	B	A	A	B	A	B	A	A	A	A	B	A	A	B	B	B	-	-	B	B	A	B	A	A	B	B	A	A	B	B	B	-
Ps159769	49.3	9.9	Ps001384	Ps120105	Ps001384	Ps001177	0.745603	B	B	A	A	A	B	A	A	B	-	B	A	A	B	A	B	A	-	-	A	B	A	A	-	B	B	A	A	B	B	A	B	A	-	B	-	-	-	B	B	B	A
Ps158482	49.3	10.8	Ps120105	Ps001177	Ps001384	Ps001177	1	B	B	A	-	-	B	A	A	B	A	-	A	A	B	-	-	A	-	A	A	B	A	A	B	B	B	A	-	B	-	A	-	A	A	B	B	A	A	B	B	-	A
Ps154189	49.3	10.2	Ps001384	Ps120105	Ps001384	Ps001177	0.42334	B	B	-	A	A	-	A	A	B	-	B	A	A	B	A	B	A	-	A	A	B	A	A	B	B	B	A	B	-	B	-	B	-	A	B	B	A	-	B	-	B	A
Ps141614	49.3	10.8	Ps001384	Ps120105	Ps001384	Ps001177	0.639412	B	B	A	A	A	B	A	A	B	A	B	-	A	B	A	B	A	-	-	A	-	A	A	B	B	-	A	B	-	B	-	B	A	A	B	B	A	A	B	B	B	A
Ps144080	49.3	10.8	Ps001384	Ps120105	Ps001384	Ps001177	0.875896	B	B	A	A	A	B	A	A	B	A	B	A	A	-	A	B	A	-	A	A	B	A	A	B	B	B	A	A	B	B	-	B	A	-	-	B	A	A	B	B	B	A
Ps140324	50	8.9	Ps120105	Ps001177	Ps001384	Ps001177	0.875896	B	B	A	A	A	B	A	A	B	A	B	A	A	B	A	-	A	B	A	A	B	A	A	B	B	B	A	B	B	B	-	-	A	-	B	-	A	A	B	B	B	A
Ps150368	50.5	7.8	Ps120105	Ps001177	Ps001384	Ps001177	0.527089	B	B	-	-	A	B	A	A	B	A	B	A	A	B	A	B	A	-	A	A	B	A	A	B	B	B	A	-	B	B	-	B	A	B	B	A	A	A	B	B	B	A
Ps119828	50.5	8	Ps120105	Ps001177	Ps001384	Ps001177	0.878794	B	B	A	A	A	B	A	A	B	A	B	A	A	B	A	-	A	-	A	A	B	-	A	B	B	B	A	B	B	-	B	B	A	A	-	A	A	A	B	B	B	A
Ps161588	50.5	8.6	Ps120105	Ps001177	Ps120105	Ps001177	0.869417	B	B	A	A	A	B	A	A	B	A	B	A	A	B	A	-	A	-	A	A	B	-	A	-	B	B	-	-	-	-	-	B	A	-	B	A	A	A	B	B	B	A
Ps149994	50.5	9.4	Ps120105	Ps001177	Ps001384	Ps001177	1	B	B	A	A	A	B	A	A	B	A	B	A	A	B	A	B	A	-	-	A	B	A	A	B	B	B	A	-	-	-	-	B	A	A	B	A	A	-	B	B	B	A
Ps151079	50.5	8	Ps120105	Ps001177	Ps001384	Ps001177	0.75183	B	B	A	A	A	B	A	A	B	A	B	-	A	B	A	B	A	-	A	A	B	A	-	B	B	B	A	-	B	B	A	B	A	-	B	A	-	-	B	B	B	A
Ps157181	50.5	8.9	Ps120105	Ps001177	Ps001384	Ps001177	0.630954	B	B	A	A	A	B	A	-	B	A	B	A	A	B	A	B	A	-	A	A	B	-	A	B	B	B	A	B	B	A	-	B	A	-	B	-	A	-	-	B	B	A
Ps157858	50.5	8.3	Ps120105	Ps001177	Ps001384	Ps001177	1	B	B	A	A	A	B	A	A	-	A	B	A	A	B	-	B	A	B	A	A	B	A	A	B	B	B	A	B	B	-	-	B	A	A	-	-	A	-	B	-	-	A
Ps134913	50.5	8.3	Ps120105	Ps001177	Ps001384	Ps001177	0.757621	B	B	A	A	A	B	A	A	-	A	B	A	A	B	A	B	A	A	A	A	B	A	A	B	B	B	-	-	B	B	-	B	A	A	B	A	A	-	B	B	B	A
Ps150205	50.7	7.5	Ps120105	Ps001177	Ps001384	Ps001177	0.75183	B	B	A	A	A	B	A	A	B	A	B	-	A	B	A	B	A	B	A	A	B	A	-	B	B	B	-	-	B	A	B	B	A	A	B	-	A	A	-	B	-	A
Ps131978	50.7	8.3	Ps120105	Ps001177	Ps120105	Ps001177	0.757621	B	B	A	A	A	B	A	A	B	A	B	A	A	B	A	B	A	-	A	A	B	A	A	B	B	B	A	-	-	A	B	B	A	A	B	A	A	A	-	B	B	A
Ps157714	50.7	7.2	Ps120105	Ps001177	Ps001384	Ps001177	0.745603	B	B	-	A	A	B	A	A	B	A	B	-	A	B	A	-	A	-	-	A	B	A	A	B	B	B	A	-	-	B	-	B	A	-	B	A	A	B	B	B	B	A
Ps128969	50.7	8.3	Ps120105	Ps001177	Ps120105	Ps001177	0.537094	B	B	A	A	A	B	A	A	B	A	-	A	A	B	A	B	A	A	A	A	B	A	A	B	B	B	A	-	B	A	B	B	A	-	B	A	A	A	B	-	-	A
Ps134613	50.8	9.1	Ps120105	Ps001177	Ps120105	Ps001177	1	B	B	A	A	A	B	A	A	B	A	-	A	A	B	A	-	A	B	A	A	B	A	A	B	B	B	A	B	B	-	-	B	A	A	B	A	-	A	B	B	B	A
Ps160098	50.8	8	Ps120105	Ps001177	Ps001384	Ps001177	1	B	B	A	A	-	B	A	A	B	A	B	A	A	B	A	B	A	B	A	A	-	A	-	B	B	B	A	A	B	B	-	B	A	A	B	A	A	-	-	B	-	-
Ps159293	50.8	8.3	Ps120105	Ps001177	Ps120105	Ps001177	0.33039	B	B	-	-	A	B	A	A	B	-	B	A	A	B	A	B	A	B	-	A	B	-	A	B	B	B	-	-	B	-	A	B	-	A	B	A	A	A	B	B	B	A
Ps161952	50.9	8.9	Ps120105	Ps001177	Ps120105	Ps001172	0.869417	B	B	A	A	A	B	A	A	-	A	B	A	-	B	A	B	A	-	A	A	B	A	A	-	B	B	A	-	B	A	A	B	-	-	-	A	A	-	B	B	B	-
Ps109578	50.9	9.7	Ps120105	Ps001177	Ps120105	Ps001177	0.763025	B	B	A	A	A	B	A	A	B	A	B	A	A	B	A	B	A	B	A	A	B	A	A	B	B	B	A	B	B	A	A	B	A	A	-	-	A	A	B	-	B	A
Ps138108	50.9	9.4	Ps120105	Ps001177	Ps120105	Ps001172	0.875896	B	B	A	A	A	-	A	A	B	A	B	A	A	B	A	B	A	-	A	A	B	A	A	B	B	B	A	B	B	A	-	B	-	A	B	A	A	-	B	B	B	A
Ps132796	51	9.4	Ps120105	Ps001177	Ps120105	Ps001172	0.757621	B	B	A	A	A	B	A	A	B	A	B	A	A	-	A	B	-	B	A	A	B	A	A	B	B	-	A	-	B	A	-	B	A	A	B	A	A	A	B	B	B	A
Ps158337	51	8	Ps120105	Ps001177	Ps120105	Ps001172	0.745603	B	B	-	-	A	B	A	A	B	-	B	A	A	-	A	B	A	-	A	-	-	A	A	B	B	B	A	A	B	A	-	B	A	A	B	A	A	A	-	B	B	A
Ps126240	51.1	9.1	Ps120105	Ps001177	Ps120105	Ps001172	0.757621	B	B	-	A	A	-	A	A	B	A	B	A	A	B	A	B	A	B	A	A	B	A	A	B	B	B	A	A	B	A	-	B	A	-	B	A	A	A	-	B	B	A
Ps152573	51.2	8	Ps120105	Ps001177	Ps120105	Ps001172	0.630954	B	-	-	A	A	B	A	A	B	-	B	-	A	B	A	B	A	B	A	A	B	A	A	B	B	-	A	B	-	A	A	B	A	A	-	A	A	A	B	B	-	A
Ps001177	51.6						1	B	B	A	A	B	B	A	A	B	A	B	A	A	B	A	B	A	-	A	A	B	A	A	B	-	B	A	-	B	A	A	B	A	-	B	A	A	-	B	B	B	A
Ps001429	51.6	25.3	Ps120105	Ps001177	Ps120105	Ps001172	0.763025	B	B	A	A	B	B	A	A	B	A	B	A	A	B	A	B	A	-	A	A	B	A	A	B	B	B	A	B	B	A	A	B	A	-	B	A	A	-	B	B	B	A
Ps001361	51.6	25.3	Ps120105	Ps001177	Ps120105	Ps001172	0.878794	B	B	A	A	B	B	A	A	B	A	B	A	A	B	A	B	A	-	A	A	B	A	A	B	B	B	A	-	B	A	A	B	A	-	B	A	A	-	B	B	B	A
Ps001422	51.6	25.3	Ps120105	Ps001177	Ps120105	Ps001172	1	B	B	A	A	B	B	A	A	B	A	B	A	A	B	A	B	A	-	A	A	B	A	A	B	-	B	A	-	B	A	A	B	A	-	B	A	A	-	B	B	B	A
Ps158892	51.6	10.5	Ps120105	Ps001177	Ps120105	Ps001172	0.33039	B	B	A	A	B	B	A	A	B	A	B	A	A	-	A	B	A	-	A	-	B	A	A	B	B	B	-	B	B	A	-	B	-	-	B	-	-	A	B	B	B	A
Ps151826	51.6	11.1	Ps120105	Ps001177	Ps120105	AA474-443	0.527089	B	-	A	A	B	B	-	A	B	A	B	A	A	B	A	B	A	-	A	A	B	A	-	-	B	B	A	-	B	A	A	B	A	A	-	A	A	A	B	B	B	A
Ps113333	51.6	12	Ps001177	Ps001172	Ps120105	Ps001172	1	B	B	A	A	B	B	A	A	B	A	B	A	A	B	A	B	A	-	A	A	B	-	A	B	B	B	A	A	B	A	A	B	A	-	B	A	A	A	B	B	B	-
Ps142824	51.6	11.4	Ps001177	Ps001172	Ps120105	Ps001172	0.639412	-	B	A	A	B	B	A	A	B	A	B	A	A	B	A	B	A	B	A	A	B	A	A	B	B	B	A	B	B	A	-	B	A	-	B	-	A	-	B	B	B	A
Ps147511	51.6	11.1	Ps001177	Ps001172	Ps120105	Ps001172	0.75183	B	B	A	A	B	B	A	A	B	A	B	A	A	B	A	B	A	B	A	A	B	A	-	B	B	B	A	-	-	A	A	B	A	-	-	-	A	-	B	B	B	A
Ps136578	51.6	11.4	Ps001177	Ps001172	Ps120105	Ps001172	0.875896	B	B	-	A	B	B	A	A	B	A	B	A	A	B	A	B	A	-	A	A	B	A	A	B	B	B	A	B	B	A	-	B	A	A	-	A	A	-	B	B	-	A
Ps161739	51.6	10.5	Ps120105	Ps001177	Ps120105	Ps001172	0.41108	B	B	A	-	B	B	A	A	B	-	B	A	A	B	A	B	A	-	A	-	B	A	-	B	B	B	A	-	B	A	A	B	A	-	B	-	A	A	-	B	B	A
Ps157995	51.6	10.2	Ps001177	Ps001172	Ps120105	Ps001172	0.516412	B	B	A	A	B	B	A	A	B	A	B	-	A	B	-	B	-	B	A	A	B	A	A	B	B	B	-	B	B	A	A	B	-	-	B	A	A	-	B	B	-	A
Ps123114	51.6	12	Ps001177	Ps001172	Ps120105	Ps001172	0.647315	B	B	A	A	B	B	A	A	B	A	B	A	A	B	-	B	A	-	A	A	B	A	A	B	B	B	-	B	B	A	A	B	A	A	B	A	A	-	B	B	B	A
Ps120160	51.6	11.7	Ps001177	Ps001172	Ps120105	Ps001172	0.647315	B	B	A	A	B	B	A	A	B	A	B	A	A	B	-	B	A	-	A	A	B	A	A	B	B	B	A	-	B	A	-	B	-	A	B	A	A	A	B	B	B	A
Ps146803	51.6	10.8	Ps001177	Ps001172	Ps001384	Ps001172	0.75183	B	B	A	A	B	B	A	A	B	A	B	A	A	B	A	B	A	-	A	-	-	A	A	B	B	-	A	B	B	-	A	B	A	A	B	-	A	-	B	-	B	A
Ps137749	51.6	11.1	Ps120105	Ps001177	Ps120105	AA474-443	0.875896	B	B	A	A	B	B	-	A	B	A	B	A	-	B	A	B	A	A	A	A	B	A	A	B	B	B	A	B	B	A	A	B	A	-	B	-	A	A	B	-	-	A
Ps120260	51.6	11.4	Ps001177	Ps001172	Ps120105	Ps001172	0.647315	B	B	A	A	B	B	A	A	B	A	B	A	A	B	A	B	-	-	A	A	B	A	A	B	B	B	A	B	B	A	A	B	A	A	B	A	-	A	B	B	-	-
Ps141433	51.6	11.1	Ps001177	Ps001172	Ps120105	Ps001172	0.875896	B	B	A	A	B	B	A	A	B	A	-	-	A	B	A	B	A	-	A	-	B	A	-	B	B	B	A	-	B	A	A	B	A	A	B	A	A	A	B	-	B	A
Ps115443	51.6	11.4	Ps120105	Ps001177	Ps120105	Ps118440	0.647315	B	B	A	A	B	B	-	A	B	A	-	A	A	B	A	-	A	B	A	A	B	A	A	B	B	B	A	B	B	A	A	-	A	A	-	A	A	A	B	B	B	A
Ps149263	51.6	10.8	Ps001177	Ps001172	Ps120105	Ps001172	0.75183	B	B	A	A	B	B	A	A	B	A	B	A	A	B	A	B	A	B	A	-	B	A	-	B	B	B	A	-	B	A	A	B	-	A	-	A	A	A	B	B	B	-
Ps134330	51.6	11.7	Ps001177	Ps001172	Ps120105	Ps001172	1	B	B	A	A	B	B	A	A	B	A	-	A	A	B	A	B	A	B	A	A	B	A	A	B	B	B	A	-	B	A	A	B	A	A	-	-	A	-	B	B	B	A
Ps129442	51.6	11.4	Ps001177	Ps001172	Ps120105	Ps001172	0.757621	B	B	A	A	B	-	A	A	B	A	B	A	A	B	-	B	-	B	A	A	B	A	A	B	B	B	A	-	B	A	-	B	A	A	B	A	A	A	B	B	B	A
Ps154182	51.6	10.8	Ps120105	Ps001177	Ps120105	AA474-443	0.630954	B	B	A	-	B	-	-	A	B	A	-	A	A	B	A	B	A	A	A	A	B	A	A	-	B	B	-	-	B	A	A	B	A	A	B	A	A	-	B	-	B	A
Ps142471	51.6	11.4	Ps001177	Ps001172	Ps120105	Ps001172	0.639412	B	B	A	-	-	B	A	A	B	A	B	A	A	B	A	B	A	-	-	A	B	A	A	B	B	B	A	B	B	A	-	B	A	-	B	A	A	A	B	B	B	A
Ps144380	51.6	10.8	Ps001177	Ps001172	Ps120105	Ps001172	0.639412	B	B	A	A	B	B	A	A	B	A	B	A	A	B	A	B	A	B	A	A	B	-	A	B	B	-	-	A	B	A	A	B	A	A	B	A	A	A	B	B	-	A
Ps156709	51.6	10.8	Ps001177	Ps001172	Ps001384	Ps001172	0.630954	B	B	A	A	B	B	A	A	B	-	B	A	A	-	A	B	-	B	A	A	B	A	A	B	B	B	A	-	B	-	A	B	A	-	-	A	A	B	-	B	B	A
Ps122264	51.6	12	Ps001177	Ps001172	Ps120105	Ps001172	0.878794	B	B	A	A	B	-	A	A	B	A	B	A	A	B	A	B	A	B	A	A	B	A	A	B	B	B	A	-	B	A	A	B	A	-	B	A	A	A	B	B	B	-
Ps145763	51.6	11.1	Ps001177	Ps001172	Ps120105	Ps001172	0.527089	B	B	A	A	B	B	A	A	-	-	B	A	A	B	A	B	A	B	A	-	B	A	A	B	B	B	A	-	B	A	A	B	A	-	B	A	-	B	B	B	B	A
Ps130892	51.6	11.7	Ps001177	Ps001172	Ps120105	Ps001172	0.757621	B	B	A	A	B	B	A	A	B	A	B	A	-	B	A	B	A	B	A	A	B	A	A	B	B	B	A	-	-	A	-	B	A	A	B	A	A	-	B	B	B	A
Ps141266	51.6	11.1	Ps001177	Ps001172	Ps120105	Ps001172	0.875896	B	B	A	A	B	B	A	A	B	A	B	A	-	-	A	B	A	-	A	A	B	A	A	B	B	B	A	B	B	A	A	-	A	A	B	A	-	-	B	B	B	-
Ps143281	51.6	11.4	Ps001177	Ps001172	Ps120105	Ps001172	0.43488	B	B	A	A	-	-	A	A	B	A	-	A	A	B	A	B	A	-	A	A	B	A	A	B	B	B	A	-	B	A	A	B	A	A	B	A	A	A	B	B	B	A
Ps144450	51.6	11.4	Ps001177	Ps001172	Ps120105	Ps001172	0.875896	B	B	A	A	B	B	A	A	B	-	B	A	A	B	A	B	A	-	A	A	B	A	A	-	B	B	A	B	B	A	A	B	A	-	B	A	A	A	-	B	B	-
Ps155333	51.6	11.1	Ps120105	Ps001177	Ps120105	AA474-443	0.630954	B	B	-	A	B	B	-	A	B	A	B	A	A	B	A	B	A	-	A	A	B	A	A	-	B	B	A	B	B	A	-	B	A	-	B	A	-	A	-	B	B	A
Ps160666	51.6	10.2	Ps120105	Ps001177	Ps120105	Ps001172	0.41108	B	B	A	-	B	B	A	A	B	-	B	A	A	B	A	B	A	-	A	A	B	-	A	-	B	B	A	B	B	A	A	-	-	-	B	-	A	A	B	B	B	-
Ps130330	51.6	11.4	Ps001177	Ps001172	Ps120105	Ps001172	0.757621	B	B	A	A	B	-	A	A	B	A	B	A	A	B	A	B	A	-	A	A	-	-	A	B	B	B	A	B	B	A	A	B	A	A	B	A	A	-	B	B	B	A
Ps146522	51.6	11.1	Ps120105	Ps001177	Ps120105	AA474-443	0.75183	B	B	A	A	B	B	-	A	B	A	B	A	A	-	A	B	A	-	A	-	B	A	A	B	-	B	A	B	B	A	A	B	-	A	B	A	A	A	B	B	B	A
Ps151009	51.6	11.1	Ps001177	Ps001172	Ps120105	Ps001172	1	B	B	A	A	B	B	A	A	B	A	B	-	A	B	A	B	A	-	A	-	B	A	A	B	B	B	A	-	B	A	A	B	A	A	B	A	-	-	B	B	-	A
Ps142173	51.6	11.7	Ps120105	Ps001177	Ps120105	Ps001298	0.639412	B	B	A	A	B	B	-	A	B	A	B	A	A	B	A	B	A	-	A	A	B	A	A	B	B	B	A	B	B	-	A	-	A	A	B	A	A	-	B	B	B	-
Ps144426	51.6	11.4	Ps001177	Ps001172	Ps120105	Ps001172	0.875896	B	B	-	-	-	B	A	A	B	A	B	A	A	B	A	B	A	-	A	A	B	A	A	B	B	B	A	-	B	A	-	B	A	-	B	A	A	A	B	B	B	A
Ps142818	51.6	11.4	Ps001177	Ps001172	Ps120105	Ps001172	0.639412	B	B	A	A	B	B	A	A	B	-	B	A	A	-	A	B	A	B	A	A	B	A	-	B	B	B	A	B	B	A	A	B	A	-	-	A	A	-	B	B	B	A
Ps121762	51.6	12.6	Ps001177	Ps001172	Ps120105	Ps001172	0.878794	B	B	A	A	B	B	A	A	B	A	B	A	A	B	A	B	A	-	A	A	B	A	A	B	-	B	A	-	B	A	A	B	A	-	B	A	A	B	B	B	B	A
Ps139126	51.6	11.1	Ps120105	Ps001177	Ps120105	Ps001172	0.43488	B	B	A	A	B	B	A	A	-	A	B	A	A	B	A	B	-	B	A	A	B	A	A	B	B	B	A	-	-	-	A	B	-	B	B	A	A	-	B	B	B	A
Ps115011	51.6	11.4	Ps001177	Ps001172	Ps120105	Ps001172	0.878794	B	B	A	A	B	-	A	A	B	-	B	A	A	B	A	B	A	A	A	A	B	A	A	B	B	B	A	B	B	A	A	B	A	A	B	A	A	-	B	-	-	A
Ps154867	51.6	10.8	Ps120105	Ps001177	Ps120105	Ps001172	0.87278	B	B	-	A	B	-	A	A	B	A	B	A	A	B	A	-	-	A	A	A	B	A	A	B	B	B	A	-	B	-	A	B	A	A	B	A	A	-	-	B	B	A
Ps111205	51.6	11.7	Ps120105	Ps001177	Ps120105	Ps001172	0.763025	B	B	A	A	B	B	A	A	B	A	B	A	A	B	-	B	A	-	A	A	B	A	A	B	B	B	A	B	B	-	A	B	A	A	B	A	-	A	B	B	B	A
Ps152763	51.6	10.2	Ps001177	Ps001172	Ps120105	Ps001172	0.630954	B	B	A	A	-	B	A	A	B	A	B	-	A	B	A	B	A	B	A	A	B	-	A	B	-	B	-	B	B	A	A	B	-	A	-	A	-	B	B	-	B	A
Ps122867	51.6	12.3	Ps001177	Ps001172	Ps120105	Ps001172	0.878794	B	B	A	A	B	B	A	A	B	A	B	A	A	B	A	B	A	-	A	A	B	A	-	B	B	B	A	-	B	A	A	B	A	A	B	A	A	-	B	B	B	A
Ps111372	51.6	12.3	Ps001177	Ps001172	Ps120105	Ps001172	1	B	B	A	A	B	B	A	A	B	A	B	A	A	B	A	B	A	B	A	A	B	A	A	B	B	B	A	-	B	A	A	B	A	-	B	A	A	A	B	-	B	A
Ps156033	51.6	10.8	Ps001177	Ps001172	Ps120105	Ps001172	0.630954	B	B	A	A	B	B	A	A	B	A	B	-	A	B	A	B	-	-	A	A	B	A	A	B	B	-	A	B	-	A	A	B	A	-	B	A	A	-	B	B	B	A
Ps161018	51.6	10.2	Ps120105	Ps001177	Ps120105	AA474-443	0.249817	B	B	A	A	B	B	-	-	B	-	B	A	A	B	A	B	-	B	A	-	B	A	A	B	B	B	A	B	B	A	A	B	A	-	B	-	A	-	B	B	-	-
Ps128062	51.6	11.7	Ps001177	Ps001172	Ps120105	Ps001172	0.757621	B	B	-	-	B	B	A	A	B	A	-	A	A	B	A	B	A	-	A	A	B	A	A	B	B	B	A	-	B	A	A	B	A	-	B	A	A	A	B	B	B	A
Ps163006	51.6	10.2	Ps120105	Ps001177	Ps120105	Ps001172	0.738883	B	B	A	A	-	B	A	A	B	A	B	-	A	B	A	-	A	B	-	-	B	A	A	B	B	-	A	-	B	A	A	B	A	-	B	A	A	-	-	B	B	A
Ps152855	51.6	10.2	Ps001177	Ps001172	Ps120105	Ps001172	0.630954	B	B	A	-	-	B	A	A	B	-	-	A	A	B	A	B	-	B	A	A	B	A	A	B	B	B	A	-	B	A	-	B	A	B	B	A	A	A	-	B	B	A
Ps162518	51.6	10.2	Ps120105	Ps001177	Ps120105	Ps001172	1	B	B	A	A	-	B	A	-	B	A	B	A	A	B	A	B	-	-	A	-	B	-	A	B	-	B	A	-	-	A	A	B	A	A	B	A	-	A	B	B	B	A
Ps155116	51.6	10.8	Ps001177	Ps001172	Ps001384	Ps001172	0.42334	B	B	A	-	B	B	A	A	B	A	B	A	A	B	A	B	A	B	A	-	B	A	A	B	B	B	A	-	B	-	A	B	A	-	B	-	-	A	B	B	B	A
Ps161074	51.6	10.2	Ps120105	Ps001177	Ps120105	Ps001172	0.621873	B	B	A	-	-	B	A	A	B	A	-	-	A	B	-	B	A	-	A	A	B	A	A	B	B	B	A	-	B	A	-	B	A	-	B	A	A	A	B	B	B	A
Ps122984	51.6	12.6	Ps001177	Ps001172	Ps120105	Ps001172	0.878794	B	B	A	A	B	B	A	A	B	A	B	A	A	B	A	B	A	-	A	A	B	A	A	B	B	B	A	-	B	A	A	B	A	-	B	A	A	-	B	B	B	A
Ps110824	51.6	12	Ps001177	Ps001172	Ps120105	Ps001172	1	B	B	A	A	B	-	A	A	B	A	B	A	A	B	A	B	A	B	A	A	B	A	A	B	B	B	A	B	B	A	A	B	A	-	B	A	A	A	B	B	B	A
Ps155769	51.6	10.8	Ps120105	Ps001177	Ps120105	AA474-443	0.87278	B	B	A	A	B	-	-	A	B	A	B	A	A	B	A	B	A	B	A	A	-	A	A	B	B	B	-	B	B	A	A	B	A	A	-	A	A	-	-	B	B	A
Ps151356	51.6	11.1	Ps001177	Ps001172	Ps120105	Ps001172	0.527089	B	B	A	A	B	B	A	A	B	A	B	A	A	B	-	B	A	B	A	A	B	A	A	B	B	B	-	-	B	A	-	B	A	A	B	A	A	-	B	B	B	A
Ps163786	51.6	9.3	Ps001177	Ps001172	Ps120105	Ps001172	0.492717	B	B	A	A	-	B	A	A	B	-	B	-	A	B	-	B	A	-	A	A	B	A	A	B	B	B	-	B	B	A	A	-	A	-	B	A	-	-	B	-	B	-
Ps147323	51.6	11.4	Ps120105	Ps001177	Ps120105	Ps001172	1	B	B	A	A	B	B	A	A	B	A	B	A	A	B	A	B	A	-	A	A	B	A	A	B	B	B	A	B	B	-	A	B	A	-	-	A	A	-	B	-	-	A
Ps156452	51.6	10.8	Ps120105	Ps001177	Ps120105	Ps001172	0.87278	-	B	A	A	B	B	A	A	B	A	-	A	A	B	A	B	A	-	A	A	B	A	A	B	B	B	A	B	-	A	A	B	A	B	B	-	A	-	B	-	B	A
Ps151968	51.6	11.1	Ps120105	Ps001177	Ps120105	Ps001172	0.75183	B	-	A	-	B	B	A	A	B	A	B	A	A	B	A	B	A	-	A	A	B	A	A	B	B	B	A	B	B	A	A	B	-	A	B	-	A	-	-	B	B	A
Ps135498	51.6	11.1	Ps120105	Ps001177	Ps120105	Ps001172	0.875896	B	B	A	A	B	B	A	A	B	-	B	A	A	B	A	B	A	B	A	-	B	A	A	B	B	B	A	-	B	A	A	B	A	-	B	-	A	A	-	-	B	A
Ps151462	51.6	11.1	Ps120105	Ps001177	Ps120105	AA474-443	1	B	B	A	A	B	B	-	A	B	A	B	A	A	B	A	-	A	-	A	-	B	A	A	B	B	B	-	B	B	A	A	B	A	A	B	A	A	A	B	-	-	A
Ps156673	51.6	11.1	Ps120105	Ps001177	Ps120105	AA474-443	0.87278	B	-	A	A	B	-	-	A	B	A	B	A	A	B	A	B	A	-	A	A	B	A	A	B	B	B	A	B	B	A	A	B	A	A	B	-	A	-	B	B	-	A
Ps119479	51.6	11.7	Ps120105	Ps001177	Ps120105	Ps001172	0.878794	B	B	A	A	B	B	A	A	B	A	B	A	A	B	A	-	A	-	A	A	B	A	A	B	B	B	A	B	B	-	A	B	-	A	B	A	A	A	B	B	B	A
Ps140709	51.6	11.4	Ps001177	Ps001172	Ps120105	Ps001172	0.875896	-	B	-	A	B	B	A	A	B	A	B	A	A	B	A	B	-	-	A	A	B	A	A	B	-	B	A	B	B	A	A	B	A	A	B	A	A	A	B	-	B	A
Ps001172	53.1						0.647315	B	B	A	A	B	B	B	A	B	A	B	A	A	B	A	B	A	-	A	A	B	A	A	B	B	B	A	-	B	A	A	B	A	-	B	A	A	-	B	B	B	A
Ps137425	53.1	11.7	Ps001177	Ps001172	Ps001177	AA474-443	0.875896	B	-	A	A	B	B	B	A	B	A	-	A	A	B	A	B	A	B	A	-	B	A	A	-	B	B	A	-	B	A	A	B	A	-	B	A	A	A	B	B	B	A
Ps109141	53.1	11.7	Ps001177	Ps001172	Ps001177	Ps001298	0.763025	B	B	A	A	B	B	B	A	B	A	B	A	A	B	A	B	A	A	A	-	B	A	A	B	B	B	A	B	B	-	-	-	A	A	B	A	A	A	B	B	B	A
Ps141100	53.1	11.7	Ps001177	Ps001172	Ps001177	AA474-443	0.875896	B	B	A	A	B	B	B	A	B	A	B	A	A	B	A	-	A	-	A	A	B	A	A	B	B	B	A	-	B	A	A	B	-	A	B	A	A	A	B	B	B	-
Ps163367	53.1	9.9	Ps001177	Ps001172	Ps001177	AA474-443	0.61209	B	B	A	-	B	B	B	A	B	A	B	A	A	-	A	B	A	-	A	A	B	-	A	B	B	B	A	B	-	-	A	B	-	-	B	-	A	-	-	-	B	A
Ps159203	53.1	11.1	Ps001177	Ps001172	Ps001177	AA474-443	0.745603	B	B	-	A	B	B	B	A	B	A	B	A	A	-	A	B	A	-	A	A	B	A	A	B	B	B	A	A	-	-	A	B	A	-	B	-	A	-	-	B	B	A
Ps151903	53.1	11.7	Ps001177	Ps001172	Ps001177	AA474-443	1	B	B	A	A	B	B	B	A	B	A	B	A	A	B	A	-	A	-	A	A	B	A	A	B	B	B	A	-	B	A	A	B	A	-	B	A	-	A	-	B	B	A
Ps127953	53.1	11.4	Ps001177	Ps001172	Ps001177	AA474-443	0.537094	B	B	A	A	B	B	B	A	B	A	B	A	A	B	A	B	A	B	A	A	B	A	-	B	B	-	A	B	-	-	-	B	A	A	B	A	A	A	B	B	B	A
Ps161100	53.1	10.8	Ps001177	Ps001172	Ps001177	AA474-443	0.869417	B	B	A	A	B	-	B	A	B	-	B	A	A	-	A	B	A	-	A	-	B	A	A	B	B	B	A	-	B	A	A	B	A	A	B	A	A	-	-	B	B	-
Ps163851	53.1	9.6	Ps001177	Ps001172	Ps120105	Ps118440	0.601508	B	-	A	A	B	B	-	A	-	A	-	A	A	B	A	-	-	B	A	-	B	A	A	B	B	-	A	-	B	A	A	-	A	-	B	A	A	-	B	-	B	A
Ps146845	53.1	11.7	Ps001177	Ps001172	Ps001177	AA474-443	1	B	B	A	A	B	B	B	A	B	A	B	A	A	B	A	B	A	-	A	A	B	A	A	B	B	B	A	-	B	A	A	B	-	A	-	A	A	-	B	B	-	A
Ps131361	53.1	12	Ps001177	Ps001172	Ps001177	AA474-443	1	B	B	A	A	B	B	B	A	B	A	B	A	A	B	A	B	A	-	A	A	B	A	A	B	B	B	A	-	B	A	A	B	-	A	B	A	A	A	B	B	-	A
Ps119753	53.1	11.7	Ps001177	Ps001172	Ps001177	AA474-443	0.647315	B	B	A	A	B	B	B	A	B	A	B	A	-	B	A	-	A	B	A	A	B	A	A	B	B	B	A	B	B	A	A	B	A	B	B	A	A	A	-	B	-	A
Ps157033	53.1	11.4	Ps001177	Ps001172	Ps001177	AA474-443	0.262332	B	B	A	A	B	B	B	A	B	A	-	A	A	B	A	B	-	-	A	A	B	-	A	B	B	B	A	-	B	-	A	B	-	-	B	A	A	B	B	B	B	A
Ps100630	53.1	12.9	Ps001177	Ps001172	Ps001177	AA474-443	0.884028	B	B	A	A	B	B	B	A	B	A	B	A	A	B	A	B	A	-	A	A	B	A	A	B	B	B	A	B	B	A	A	B	A	A	B	A	A	A	B	B	B	A
Ps152551	53.1	10.5	Ps001177	Ps001172	Ps001177	AA474-443	0.630954	-	B	-	A	B	B	B	A	B	A	B	A	A	B	A	B	A	A	A	-	B	A	A	-	-	B	A	-	B	-	A	B	A	A	B	A	A	A	B	-	-	A
Ps147122	53.1	11.4	Ps001177	Ps001172	Ps001177	Ps001298	0.342782	B	B	A	A	B	B	B	A	B	A	B	A	A	B	A	B	A	B	A	A	B	-	A	B	B	B	A	B	B	A	-	-	A	-	B	-	A	-	B	B	-	A
Ps142073	53.1	11.7	Ps001177	Ps001172	Ps001177	Ps118440	0.639412	B	B	A	-	B	B	B	A	B	A	-	A	A	B	A	B	-	-	A	A	B	A	A	B	B	B	A	B	B	A	A	-	A	A	B	A	A	-	B	B	B	A
Ps143567	53.1	12	Ps001177	Ps001172	Ps001177	AA474-443	0.43488	B	B	A	A	B	B	B	A	B	A	B	A	A	-	A	B	A	B	A	A	B	A	A	B	B	B	A	-	B	A	A	B	A	-	B	A	-	-	B	B	B	-
Ps147181	53.1	11.7	Ps001177	Ps001172	Ps001177	Ps001298	1	B	B	A	A	B	B	B	A	B	-	B	A	A	-	A	B	A	-	A	A	B	A	A	B	B	B	A	-	B	A	A	-	A	-	B	A	A	A	B	-	B	A
Ps150695	53.1	11.1	Ps001177	Ps001172	Ps001177	AA474-443	0.342782	B	B	A	A	B	B	B	A	B	A	B	-	-	B	A	B	A	-	A	-	B	A	A	B	B	-	A	B	B	A	A	B	A	A	B	-	A	-	B	B	B	A
Ps161262	53.1	10.2	Ps001177	Ps001172	Ps001177	AA474-443	0.869417	B	B	A	A	-	B	B	-	B	A	-	A	A	B	A	B	-	-	A	A	B	A	A	-	-	B	-	B	B	A	-	B	A	-	B	A	A	A	B	B	B	A
Ps163014	53.1	10.2	Ps001177	Ps001172	Ps001177	AA474-443	0.182422	B	B	-	A	B	B	B	-	B	-	B	A	A	B	A	B	A	B	A	-	B	A	A	B	B	B	A	-	B	A	-	B	A	A	B	-	A	-	-	B	B	A
Ps123888	53.1	12.6	Ps001177	Ps001172	Ps001177	AA474-443	0.647315	B	B	A	A	-	B	B	A	B	A	B	A	A	B	A	B	A	-	A	A	B	A	A	B	B	B	A	B	B	A	A	B	A	-	B	A	A	-	B	B	B	A
Ps157930	53.1	10.5	Ps001177	Ps001172	Ps001177	AA474-443	1	B	B	-	A	B	B	B	A	B	-	B	-	A	-	A	B	A	A	A	A	B	A	A	B	B	B	A	-	-	A	-	B	A	A	B	A	A	-	B	B	-	A
Ps152767	53.1	10.8	Ps001177	Ps001172	Ps001177	AA474-443	0.87278	B	B	A	A	B	B	B	A	B	A	B	A	-	B	A	B	A	-	A	-	B	A	A	B	B	-	A	B	B	A	-	B	A	-	B	A	A	A	-	-	B	A
Ps133674	53.1	11.7	Ps001177	Ps001172	Ps001177	Ps001298	0.757621	B	B	A	A	B	B	B	A	B	A	B	A	A	B	A	B	A	B	A	A	B	A	A	B	B	B	A	B	-	A	A	-	-	A	-	A	A	-	B	B	B	A
Ps149762	53.1	11.4	Ps001177	Ps001172	Ps001177	AA474-443	0.75183	B	B	A	A	B	B	B	A	B	A	-	A	A	B	-	B	A	-	A	-	B	A	A	B	B	B	A	B	-	A	A	B	A	A	B	A	A	-	B	B	-	A
Ps147437	53.6	9.4	Ps001172	AA474-443	Ps001172	Ps001298	1	B	B	A	A	B	B	B	A	B	-	B	A	A	B	A	-	A	-	A	A	B	A	A	B	B	B	A	B	-	A	-	A	A	A	B	A	-	-	-	B	B	A
Ps145236	53.6	9.4	Ps001172	AA474-443	Ps001172	Ps001298	0.342782	B	-	A	A	-	B	B	A	B	A	B	A	A	B	A	B	A	A	A	A	B	A	A	B	-	B	A	-	B	A	A	A	A	-	B	A	A	-	-	B	B	A
Ps127947	53.6	11.4	Ps001172	AA474-443	Ps001172	Ps118440	0.757621	B	B	A	A	B	B	B	-	B	A	-	A	A	B	A	B	A	B	A	A	B	A	A	B	B	B	A	B	B	A	A	A	A	B	-	A	A	-	B	B	B	A
Ps124457	53.6	9.7	Ps001172	AA474-443	Ps001172	Ps001298	0.757621	B	B	A	A	B	-	B	A	B	A	B	A	A	B	A	-	A	-	-	A	B	A	A	B	B	B	A	A	B	-	A	A	A	A	B	-	A	A	B	B	B	A
Ps158238	53.6	9.1	Ps001172	AA474-443	Ps001384	Ps001298	1	B	B	A	A	B	B	-	A	-	-	B	A	A	B	A	B	A	-	A	A	B	A	A	B	B	B	A	B	B	-	A	A	A	-	B	-	A	-	B	-	B	A
Ps142374	53.6	10	Ps001172	AA474-443	Ps001172	Ps001298	0.875896	B	B	A	A	B	B	B	-	B	A	B	A	A	B	A	B	A	-	A	A	B	A	-	B	B	B	A	-	B	A	A	A	A	A	B	-	-	A	B	B	B	A
Ps162872	53.6	9.6	Ps001172	AA474-443	Ps001172	AA155-365	0.738883	B	B	-	-	B	-	B	A	B	A	-	A	A	B	A	B	A	A	A	A	B	-	-	-	B	B	A	-	-	A	-	A	A	-	-	A	A	A	B	B	B	A
Ps135342	53.6	9.1	Ps001172	AA474-443	Ps001172	Ps001298	0.43488	B	B	A	-	B	-	B	A	B	A	B	-	-	B	A	B	A	B	A	A	B	A	A	B	B	B	A	B	-	A	A	A	A	B	B	-	A	A	B	B	B	A
Ps139914	53.6	10	Ps001172	AA474-443	Ps001172	Ps001298	0.875896	B	B	A	A	B	B	B	A	B	A	B	A	A	-	A	B	-	-	A	A	B	A	A	-	B	B	A	-	B	A	A	A	A	B	B	A	A	-	B	-	B	A
Ps129537	53.6	10.3	Ps001172	AA474-443	Ps001172	Ps001298	1	B	B	A	A	B	B	B	-	B	A	B	A	A	B	A	B	A	-	A	A	B	A	A	-	B	B	-	-	B	A	A	A	A	A	B	A	A	-	B	B	B	A
Ps132798	53.6	9.7	Ps001172	AA474-443	Ps001172	Ps001298	0.537094	B	B	A	A	B	B	B	-	B	-	B	A	-	B	A	B	A	-	A	A	B	-	-	B	B	B	A	B	B	A	A	A	A	A	B	A	A	A	B	B	B	A
AA474-443	54.1						1	B	B	A	A	B	B	B	A	B	A	B	A	A	B	A	B	A	-	A	A	B	A	A	B	B	B	A	-	B	A	A	A	A	A	B	A	A	-	B	B	B	A
Ps120286	54.1	12.3	Ps001172	AA474-443	Ps001172	Ps001298	0.878794	B	B	A	-	B	B	B	A	B	A	B	A	A	B	A	B	A	-	A	A	B	A	A	-	B	B	A	B	B	A	A	A	A	A	B	A	A	-	B	B	B	A
Ps153043	54.1	10.8	Ps001172	AA474-443	Ps001172	Ps001298	0.87278	B	B	A	A	-	B	B	A	B	-	B	A	A	B	A	B	A	-	A	A	B	-	A	-	B	B	A	B	B	-	A	A	A	-	B	A	A	A	B	B	B	A
Ps154332	54.1	11.1	Ps001172	AA474-443	Ps001172	Ps001298	0.87278	B	B	A	A	B	B	B	A	-	A	B	A	A	B	A	-	A	-	A	-	B	A	A	B	B	B	A	-	B	-	A	A	A	-	B	A	A	A	B	B	-	A
Ps155573	54.1	11.1	Ps001172	AA474-443	Ps001172	Ps001298	0.87278	B	B	A	A	B	B	B	-	B	A	B	A	A	B	A	B	A	B	A	-	B	A	A	B	-	B	A	-	B	-	A	A	A	A	B	A	A	-	B	B	-	A
Ps137905	54.1	11.4	Ps001172	AA474-443	Ps001172	Ps001298	0.639412	B	B	A	A	-	-	B	A	-	A	B	A	A	-	A	B	A	-	A	A	B	A	A	B	B	B	A	B	B	-	A	A	A	A	B	A	A	A	B	B	B	A
Ps133222	54.1	12	Ps001172	AA474-443	Ps001172	Ps105493	0.757621	B	B	-	A	-	B	B	A	B	A	-	A	A	B	A	B	A	-	A	A	B	A	A	B	B	B	A	B	B	-	A	A	A	A	B	A	A	-	B	B	B	A
Ps163366	54.1	9.6	Ps001172	AA474-443	Ps001172	Ps001298	0.236724	B	B	A	A	B	-	B	A	B	A	B	A	A	-	A	-	A	B	A	A	B	-	A	B	B	B	A	-	-	A	A	A	A	-	-	A	A	A	-	-	-	A
Ps121846	54.1	12	Ps001172	AA474-443	Ps001172	Ps001298	0.878794	B	B	A	A	B	B	B	A	B	A	B	A	A	B	A	B	-	A	A	A	B	A	A	-	B	B	A	-	B	A	A	A	-	A	B	A	A	A	B	B	B	A
Ps127986	54.1	12	Ps001172	AA474-443	Ps001172	Ps001298	0.757621	B	B	A	A	B	B	B	A	B	A	B	A	A	B	A	B	A	-	A	A	B	-	A	B	-	B	A	A	B	A	A	A	A	A	B	A	A	-	B	B	B	A
Ps153224	54.1	11.1	Ps001172	AA474-443	Ps001172	AA155-365	0.87278	B	B	A	A	-	B	B	A	B	A	-	A	-	B	A	B	A	B	A	A	B	A	A	B	B	B	A	-	B	-	A	A	A	A	B	A	-	A	-	B	B	A
Ps112185	54.1	12	Ps001172	AA474-443	Ps001172	Ps001298	0.763025	B	-	A	A	B	B	B	A	B	A	B	A	A	B	A	B	A	B	A	A	B	A	-	B	B	B	A	B	B	A	A	A	A	-	B	A	A	A	B	B	B	A
Ps145754	54.1	10.8	Ps001172	AA474-443	Ps001172	Ps118440	1	B	B	A	-	B	B	B	A	B	A	-	A	A	B	A	B	A	B	A	-	B	A	A	B	B	B	A	B	-	A	A	A	A	-	B	A	A	A	-	B	-	A
Ps124463	54.1	11.7	Ps001172	AA474-443	Ps001172	Ps118440	0.757621	B	B	A	A	B	B	B	A	B	A	-	A	A	B	-	B	-	B	A	-	B	A	A	B	B	B	A	-	B	A	A	A	A	A	B	A	A	A	B	B	B	A
Ps123909	54.1	12.6	Ps001172	AA474-443	Ps001172	Ps001298	0.878794	B	B	A	A	B	B	B	A	B	A	B	A	A	B	A	B	A	-	A	A	B	A	A	B	B	B	A	-	B	A	A	A	A	-	B	A	A	-	B	B	B	A
Ps157665	54.1	10.5	Ps001172	AA474-443	Ps001172	Ps001298	0.516412	B	B	-	A	B	B	-	A	-	A	B	A	-	B	A	B	A	B	A	A	B	A	A	B	B	B	A	-	B	A	A	A	A	A	B	-	-	B	-	B	B	-
Ps149352	54.1	11.1	Ps001172	AA474-443	Ps001172	Ps001298	0.75183	B	B	-	A	B	B	B	A	B	A	B	A	A	B	A	B	A	B	A	A	B	A	A	B	B	-	A	B	B	A	A	A	-	-	B	A	A	-	B	B	B	A
Ps140574	54.1	11.4	Ps001172	AA474-443	Ps001172	Ps001298	0.639412	B	B	A	-	B	B	B	A	B	-	B	A	A	B	A	-	-	B	A	A	B	A	A	B	B	B	A	B	B	A	A	A	A	A	B	A	A	-	-	B	B	A
Ps121736	54.1	12.3	Ps001172	AA474-443	Ps001172	Ps001298	0.647315	B	B	A	A	B	B	B	A	B	A	B	A	A	B	A	B	A	-	A	A	B	A	A	B	B	B	A	B	B	A	-	A	-	A	B	A	A	-	B	B	B	A
Ps118835	54.1	12	Ps001172	AA474-443	Ps001172	Ps001298	0.878794	B	B	A	-	B	B	B	A	B	A	B	A	A	B	A	B	A	-	A	A	B	A	A	B	B	B	A	B	B	A	A	A	A	A	-	A	A	A	-	B	B	A
Ps121745	54.1	12.3	Ps001172	AA474-443	Ps001172	Ps001298	0.878794	B	B	A	A	B	B	B	A	B	A	B	A	A	B	A	B	A	B	A	A	B	A	A	B	B	B	A	-	B	A	A	A	A	A	B	-	A	A	B	B	B	A
Ps131502	54.1	12.3	Ps001172	AA474-443	Ps001172	Ps001298	0.757621	B	B	A	-	B	B	B	A	B	A	B	A	A	B	A	B	A	-	A	A	B	A	A	B	B	B	A	-	B	-	A	A	A	A	B	A	A	-	B	B	B	A
Ps142938	54.1	11.7	Ps001172	AA474-443	Ps001172	Ps001298	0.43488	B	B	A	-	B	B	B	-	B	A	B	-	A	B	A	B	A	B	A	A	B	A	A	B	B	B	A	-	B	A	A	A	A	-	B	A	A	-	B	B	B	A
Ps141491	54.1	11.7	Ps001172	AA474-443	Ps001172	Ps001298	0.639412	B	B	A	A	B	B	B	A	-	A	B	A	A	B	A	B	A	-	A	A	B	A	A	B	B	B	A	-	B	A	A	A	A	-	B	A	A	A	-	-	B	A
Ps162788	54.1	10.2	Ps001172	AA474-443	Ps001172	Ps118440	0.738883	B	B	-	-	B	B	B	A	B	A	-	A	A	-	A	B	A	-	A	A	B	-	A	B	-	-	A	B	-	-	A	A	A	A	B	A	A	A	B	B	B	A
Ps119212	54.1	12.3	Ps001172	AA474-443	Ps001172	Ps001298	0.878794	B	B	A	A	B	B	B	A	B	A	B	A	A	B	A	B	A	B	A	A	B	A	A	B	B	B	A	-	B	-	A	A	A	A	B	A	A	-	-	B	B	A
Ps160192	54.1	11.1	Ps001172	AA474-443	Ps001172	Ps001298	0.516412	B	B	-	A	B	B	B	A	B	-	B	A	A	B	A	B	A	-	A	A	B	A	A	B	B	B	A	-	B	A	A	A	A	-	B	-	A	-	B	B	-	-
Ps143683	54.1	11.4	Ps001172	AA474-443	Ps001172	Ps118440	0.875896	-	B	A	A	B	B	B	A	B	-	-	-	-	B	A	B	A	B	A	A	B	A	A	B	B	B	A	-	B	A	A	A	A	A	B	A	A	A	B	B	B	A
Ps127148	54.1	11.7	Ps001172	AA474-443	Ps001172	Ps001298	0.537094	B	B	A	A	B	B	B	A	B	A	B	A	A	-	A	B	A	-	A	A	B	A	A	B	B	-	A	B	B	A	A	A	A	A	B	A	A	A	-	B	B	A
Ps147308	54.1	11.7	Ps001172	AA474-443	Ps001172	Ps001298	0.527089	B	B	-	A	B	B	B	A	B	A	B	A	A	B	A	B	A	B	A	A	B	A	A	B	B	B	A	-	B	A	A	A	A	A	B	A	-	-	B	B	B	-
Ps122392	54.1	12	Ps001172	AA474-443	Ps001172	Ps001298	0.878794	B	B	A	A	B	B	B	A	B	A	B	A	A	-	A	B	A	A	A	A	B	A	A	B	B	B	A	B	B	A	A	A	A	-	B	A	A	-	B	-	B	A
Ps154535	54.1	10.8	Ps001172	AA474-443	Ps001172	Ps001298	0.630954	B	B	A	A	B	B	B	A	B	-	B	A	A	B	A	B	-	B	-	A	B	A	A	B	-	B	-	-	-	A	A	A	A	A	B	A	-	A	B	B	B	A
Ps157948	54.1	10.8	Ps001172	AA474-443	Ps001172	Ps118440	0.516412	B	B	A	A	B	B	B	-	B	A	-	A	A	B	A	-	A	-	A	A	B	A	A	B	B	B	A	B	B	A	A	A	A	-	-	A	A	A	B	B	B	A
Ps110977	54.1	12.6	Ps001172	AA474-443	Ps001172	Ps001298	0.763025	B	B	A	A	B	B	B	-	B	A	B	A	A	B	A	B	A	B	A	A	B	A	A	B	B	B	A	-	B	A	A	A	A	A	B	A	A	-	B	B	B	A
Ps112791	54.1	12.6	Ps001172	AA474-443	Ps001172	Ps001298	0.763025	B	B	A	A	B	B	B	-	B	A	B	A	A	B	A	B	A	A	A	A	B	A	A	B	B	B	A	-	B	A	A	A	A	-	B	A	A	-	B	B	B	A
Ps133563	54.1	12.3	Ps001172	AA474-443	Ps001172	Ps001298	1	B	B	A	-	B	B	B	A	B	A	B	A	A	B	A	B	A	-	A	A	B	A	A	B	B	B	A	-	B	A	A	A	A	A	-	A	A	-	B	B	B	A
Ps133400	54.1	11.7	Ps001172	AA474-443	Ps001172	Ps118440	0.757621	B	B	A	A	B	B	B	A	B	A	-	A	A	B	-	B	A	B	A	A	B	A	A	B	B	-	A	-	B	A	A	A	A	A	B	A	A	A	B	B	B	A
Ps139856	54.1	11.4	Ps001172	AA474-443	Ps001172	Ps001298	0.274299	B	B	-	A	B	B	B	A	B	-	B	A	A	B	A	B	A	B	A	A	B	A	-	B	B	B	A	B	B	A	A	A	A	-	-	A	-	-	B	B	B	A
Ps157956	54.1	10.5	Ps001172	AA474-443	Ps001172	Ps105493	0.745603	B	B	A	-	-	B	B	A	B	A	-	A	A	B	A	B	A	-	A	A	B	A	A	B	B	B	A	B	B	A	A	A	A	A	-	-	-	A	B	-	-	A
Ps160108	54.1	10.8	Ps001172	AA474-443	Ps001172	Ps001298	0.745603	B	B	A	A	B	-	B	A	B	-	B	A	A	B	A	B	-	-	A	A	B	A	A	B	B	B	A	B	B	A	-	A	A	A	B	A	A	-	B	B	B	A
Ps154852	54.1	11.4	Ps001172	AA474-443	Ps001172	Ps001298	0.87278	B	B	A	A	B	B	B	A	B	A	B	A	A	B	A	B	-	-	-	A	B	A	A	B	-	B	A	-	-	-	A	A	A	A	B	A	A	-	B	B	B	A
Ps151633	54.1	11.7	Ps001172	AA474-443	Ps001172	Ps001298	0.75183	B	B	A	A	B	B	B	A	B	A	B	A	A	B	A	B	A	-	A	A	B	A	A	B	B	B	A	-	-	A	A	A	A	A	B	A	-	-	B	-	B	A
Ps143603	54.1	11.7	Ps001172	AA474-443	Ps001172	Ps001298	0.875896	-	B	A	A	B	B	B	A	B	A	B	A	A	B	A	B	-	-	A	A	B	A	A	B	B	B	A	A	B	A	A	A	A	-	B	A	A	-	B	B	B	-
Ps158140	54.1	10.8	Ps001172	AA474-443	Ps001172	Ps001298	0.745603	-	B	A	A	B	B	B	A	B	A	B	A	A	B	A	B	A	-	A	A	B	A	A	B	B	B	-	A	-	-	A	A	A	-	-	A	A	-	-	B	B	A
Ps139218	54.1	11.7	Ps001172	AA474-443	Ps001172	Ps118440	0.639412	B	B	A	A	B	B	B	A	B	A	-	A	A	B	A	B	A	-	A	A	B	A	A	B	B	B	A	B	B	A	A	A	A	A	B	A	-	A	B	-	B	A
Ps139150	54.1	11.4	Ps001172	AA474-443	Ps001172	Ps001298	0.639412	B	B	-	A	B	B	B	A	B	A	B	A	A	B	A	B	A	A	A	A	B	A	A	B	B	B	A	B	B	A	-	A	A	-	B	-	A	-	B	B	B	A
Ps118511	54.1	12.3	Ps001172	AA474-443	Ps001172	Ps001298	0.878794	B	B	A	A	B	B	B	A	B	A	B	A	A	B	A	B	A	-	A	-	B	A	A	B	B	B	A	-	B	A	A	A	A	A	B	A	-	A	B	B	B	A
Ps163673	54.1	9.9	Ps001172	AA474-443	Ps001172	Ps118440	0.865772	-	B	-	A	B	B	B	A	B	A	-	A	A	B	-	-	A	-	A	A	B	A	A	B	-	B	A	B	-	A	A	A	-	A	B	A	-	-	B	B	B	A
Ps157076	54.1	11.1	Ps001172	AA474-443	Ps001172	Ps001298	0.87278	B	-	A	A	B	B	B	A	B	A	B	-	A	B	-	-	-	-	A	A	B	A	A	B	B	B	A	-	-	A	A	A	A	A	B	A	A	A	B	B	B	A
Ps145792	54.5	10.8	AA474-443	Ps001298	AA474-443	Ps115719	0.527089	B	B	A	-	-	B	B	A	B	A	A	A	A	B	A	B	A	A	-	A	B	A	A	B	B	B	A	A	B	-	A	A	A	A	B	-	A	A	-	B	B	A
Ps001298	55						0.757621	B	B	A	A	B	B	B	A	B	A	A	A	A	B	A	B	A	-	A	A	B	A	A	B	-	B	A	-	B	A	A	A	A	-	B	A	A	-	B	B	B	A
Ps144019	55	11.4	AA474-443	Ps001298	AA474-443	Ps118440	0.875896	B	B	A	A	B	B	B	A	B	A	A	A	A	B	A	-	A	-	-	A	B	A	A	B	B	B	A	B	B	A	A	A	-	-	B	A	A	A	B	-	B	A
Ps151365	55	10.8	AA474-443	Ps001298	AA474-443	AA155-365	0.75183	B	B	A	A	B	B	B	A	B	A	A	A	-	B	A	B	-	-	A	A	B	-	-	B	B	B	A	-	-	A	A	A	A	A	B	A	A	A	B	B	B	A
Ps111058	55	12.3	Ps001298	Ps118440	Ps001172	Ps118440	0.546494	B	B	A	A	B	B	B	A	B	A	-	A	A	B	A	B	A	A	A	A	B	A	A	B	B	B	A	-	B	A	A	A	A	A	B	A	A	A	B	-	B	A
Ps152695	55	10.2	AA474-443	Ps001298	AA474-443	Ps118440	0.42334	B	-	A	A	B	B	B	A	B	A	A	-	A	B	A	B	-	-	A	A	B	A	-	B	B	B	-	B	B	A	-	A	-	A	B	A	A	A	B	B	B	A
Ps121123	55	11.7	AA474-443	Ps001298	AA474-443	Ps118440	0.647315	B	B	A	A	B	B	B	A	B	A	A	A	A	B	-	B	A	B	A	A	-	A	A	B	B	B	A	-	B	A	A	A	A	A	B	A	A	A	B	B	B	A
Ps151381	55	10.5	AA474-443	Ps001298	AA474-443	AA155-365	0.527089	B	B	A	A	B	B	B	A	-	A	A	A	A	-	A	B	A	B	A	A	B	A	A	B	B	-	-	-	B	-	A	A	-	A	B	A	A	A	B	B	B	A
Ps113313	55	12.3	AA474-443	Ps001298	AA474-443	Ps118440	0.763025	B	B	A	A	B	B	B	A	B	A	A	A	A	B	A	B	A	B	A	A	B	A	A	B	B	-	A	-	B	A	A	A	A	A	B	A	A	-	B	B	B	A
Ps132290	55	11.4	AA474-443	Ps001298	AA474-443	AA155-365	0.757621	-	B	A	A	B	B	B	A	B	A	A	A	A	B	A	B	A	-	A	A	B	A	A	B	B	-	A	B	B	A	-	A	A	-	B	A	A	A	B	B	B	A
Ps149958	55	11.1	AA474-443	Ps001298	AA474-443	AA155-365	0.527089	-	B	A	A	-	B	B	A	B	A	A	-	A	B	A	B	A	-	A	A	B	A	A	B	B	B	A	B	-	A	A	A	A	A	B	A	A	-	B	-	B	A
Ps147105	55	11.1	AA474-443	Ps001298	AA474-443	Ps118440	0.342782	B	B	A	A	B	B	-	A	-	A	A	A	A	B	A	B	A	-	A	A	B	A	A	B	B	-	A	-	B	A	A	A	A	A	B	A	A	A	B	-	B	A
Ps153940	55	10.8	AA474-443	Ps001298	AA474-443	Ps118440	0.87278	B	B	-	A	B	-	B	A	B	-	A	A	A	B	A	B	-	-	A	A	B	A	A	B	B	B	A	-	-	A	-	A	A	A	B	A	A	-	B	B	B	A
Ps132369	55	11.7	AA474-443	Ps001298	AA474-443	Ps118440	0.537094	B	B	A	A	B	B	B	A	B	A	A	A	A	B	A	B	A	-	A	A	B	A	A	-	B	B	A	B	B	A	A	A	A	A	B	A	A	-	B	-	-	A
Ps161026	55	10.5	Ps001298	Ps118440	Ps120105	Ps118440	0.869417	B	B	A	A	B	B	-	A	B	A	-	A	-	B	A	-	-	-	A	A	-	-	A	B	B	B	A	-	B	A	A	-	A	A	B	A	A	A	B	B	B	A
Ps135064	55	11.4	AA474-443	Ps001298	AA474-443	AA155-365	0.757621	B	B	A	A	B	B	B	A	B	-	A	A	A	B	A	B	A	A	A	A	B	A	A	B	B	B	A	-	-	A	A	A	A	-	B	-	A	A	B	B	B	A
Ps122470	55	12	AA474-443	Ps001298	AA474-443	Ps118440	0.878794	B	B	A	A	B	B	B	A	B	A	A	-	A	B	A	B	A	B	A	A	B	A	A	B	B	B	A	-	B	A	A	A	A	A	B	A	A	-	B	B	B	A
Ps154368	55	10.8	AA474-443	Ps001298	AA474-443	AA155-365	0.42334	-	B	A	A	B	B	-	A	B	A	A	A	-	B	A	B	A	-	A	A	-	A	A	B	B	B	A	-	B	-	A	A	A	-	-	A	A	A	B	B	B	A
Ps163216	55	9.9	AA474-443	Ps001298	AA474-443	AA155-365	0.317311	B	B	A	A	B	B	B	A	B	-	A	-	A	-	-	B	A	-	A	A	B	A	A	-	B	-	A	A	B	A	A	A	A	-	-	A	A	-	-	B	B	A
Ps163870	55	9.3	Ps001298	Ps118440	Ps001172	Ps118440	0.861804	B	-	-	A	B	-	B	A	B	A	-	-	-	B	-	B	A	-	A	A	B	-	A	-	B	B	A	-	B	A	A	A	A	A	B	-	-	A	B	B	B	A
Ps135114	55	11.4	AA474-443	Ps001298	AA474-443	AA155-365	0.639412	B	B	A	A	B	B	B	A	B	A	A	A	A	B	-	B	A	-	A	A	B	A	A	B	-	B	A	B	-	A	A	A	A	-	B	A	A	A	B	B	B	A
Ps131894	55	11.7	AA474-443	Ps001298	AA474-443	Ps118440	0.537094	B	B	A	-	B	B	B	A	B	A	A	A	A	B	A	B	A	-	A	A	B	-	-	B	B	B	A	B	B	A	A	A	A	-	B	A	A	-	B	B	B	A
Ps160383	55	10.8	Ps001298	Ps118440	Ps001172	Ps118440	0.745603	B	-	A	A	B	-	B	A	B	A	-	A	A	B	A	B	A	A	A	A	B	A	-	B	B	B	A	-	B	-	A	A	A	-	B	A	A	-	-	B	B	A
Ps132502	55	11.4	AA474-443	Ps001298	AA474-443	Ps118440	0.354539	B	B	A	A	B	B	B	A	B	A	A	A	A	B	A	B	A	-	A	A	B	A	A	-	B	B	A	A	B	A	A	-	A	A	B	A	A	A	-	B	-	A
Ps125953	55	11.4	AA474-443	Ps001298	AA474-443	AA155-365	0.757621	B	-	A	A	-	B	B	A	B	-	A	A	A	B	A	B	A	B	A	A	B	A	A	-	B	B	A	B	B	A	A	A	A	-	B	A	A	A	B	B	B	A
Ps143373	55	11.1	AA474-443	Ps001298	AA474-443	Ps118440	0.639412	B	B	A	A	B	B	B	A	B	A	A	A	A	B	A	B	-	A	A	A	B	A	A	B	B	B	-	-	B	-	A	A	A	A	B	A	A	A	B	B	B	A
Ps158169	55	9.9	AA474-443	Ps001298	AA474-443	Ps118440	0.516412	B	B	A	A	B	B	B	A	B	-	A	A	A	B	A	B	-	A	A	A	B	-	A	B	-	-	A	B	B	-	A	A	A	A	-	A	A	A	-	B	B	A
Ps143220	55	11.7	AA474-443	Ps001298	AA474-443	Ps118440	0.875896	B	B	-	A	B	B	B	A	B	A	A	A	A	B	A	B	-	-	A	-	B	A	A	B	B	B	A	-	B	A	A	A	A	-	B	A	A	A	B	B	B	A
Ps110158	55	12.3	AA474-443	Ps001298	AA474-443	Ps118440	0.546494	B	B	A	A	B	B	B	A	B	A	A	A	A	-	A	B	A	-	A	A	B	A	A	B	B	B	A	-	B	A	A	A	A	A	B	A	A	A	B	B	B	A
Ps156874	55	11.1	AA474-443	Ps001298	AA474-443	AA155-365	0.87278	B	B	A	A	B	B	B	A	B	A	A	A	A	B	A	B	A	-	A	A	B	A	A	B	B	B	-	-	B	-	A	A	A	-	B	-	A	-	B	B	B	A
Ps156418	55	11.1	Ps001298	Ps118440	Ps001172	Ps118440	0.87278	B	B	A	A	B	B	B	-	B	A	-	A	A	B	A	B	-	-	A	A	B	A	A	B	B	B	A	-	-	A	A	A	A	A	B	-	A	A	B	B	B	A
Ps141195	55	11.4	AA474-443	Ps001298	AA474-443	Ps118440	0.639412	B	B	A	A	B	B	B	A	-	A	A	A	A	B	A	B	A	-	A	A	B	A	A	B	B	B	A	-	-	-	A	A	A	A	B	A	A	B	B	B	B	A
Ps135994	55	11.1	AA474-443	Ps001298	AA474-443	Ps118440	0.43488	B	B	A	A	B	B	B	A	B	A	A	A	A	B	A	B	A	A	A	A	B	-	-	B	B	B	A	-	B	A	A	A	A	A	B	A	A	A	-	B	B	A
Ps110944	55	12	AA474-443	Ps001298	AA474-443	Ps118440	0.763025	B	-	A	A	B	B	B	A	B	A	A	A	A	B	A	B	A	B	A	A	B	A	A	B	B	B	A	-	-	A	A	A	A	A	B	A	A	B	B	B	B	A
Ps129176	55	11.4	AA474-443	Ps001298	AA474-443	Ps118440	0.757621	B	B	A	A	B	B	B	A	B	A	A	A	A	B	A	B	A	-	A	A	B	A	A	-	B	B	A	B	B	A	A	A	-	A	B	A	-	A	-	B	B	A
Ps122462	55	11.4	AA474-443	Ps001298	AA474-443	Ps118440	0.878794	B	B	A	-	B	B	B	-	B	A	A	A	A	B	A	-	A	A	A	A	B	A	A	B	B	B	-	B	B	A	A	A	A	A	B	A	A	A	B	B	B	A
Ps139720	55	10.8	AA474-443	Ps001298	Ps001177	AA155-365	0.639412	B	-	A	A	B	B	B	A	B	A	A	A	A	-	A	B	A	B	A	A	B	A	A	B	B	B	A	A	B	-	A	-	-	A	B	A	A	-	B	B	B	A
Ps129123	55	11.7	AA474-443	Ps001298	AA474-443	Ps118440	1	B	B	A	-	B	B	B	A	-	A	A	A	A	B	A	B	A	B	A	A	B	A	A	B	B	B	A	-	B	A	-	A	A	A	B	A	A	-	B	B	B	A
Ps140638	55	11.4	AA474-443	Ps001298	AA474-443	Ps118440	0.875896	B	-	A	A	B	B	B	A	B	A	A	A	A	B	A	B	-	B	A	A	B	A	A	B	B	B	A	-	B	A	A	A	-	A	B	A	A	-	B	B	B	A
Ps111322	55	11.4	AA474-443	Ps001298	AA474-443	AA155-365	0.546494	B	B	A	A	B	B	B	A	B	A	A	-	A	B	A	-	A	A	A	A	B	A	A	B	B	-	A	B	B	A	A	A	-	A	B	A	A	A	B	B	B	A
Ps142488	55	11.7	AA474-443	Ps001298	AA474-443	Ps118440	0.639412	B	B	A	A	B	-	B	A	B	A	A	A	A	B	A	B	A	-	A	A	B	A	A	B	B	B	A	-	B	-	A	A	A	A	B	A	A	-	-	B	B	A
Ps154259	55	10.8	AA474-443	Ps001298	AA474-443	Ps118440	0.42334	B	B	A	A	B	B	B	A	B	A	A	-	A	B	A	B	A	A	A	A	B	A	A	B	-	-	A	B	B	-	A	A	A	A	-	A	A	-	-	-	B	A
Ps156892	55	11.1	AA474-443	Ps001298	AA474-443	Ps118440	0.42334	B	B	A	A	B	-	B	A	B	A	A	A	A	B	A	B	-	-	A	A	-	A	A	B	B	B	A	-	-	A	A	A	A	A	B	A	A	-	B	B	B	A
Ps141437	55	11.4	AA474-443	Ps001298	AA474-443	Ps118440	0.639412	B	B	A	A	B	B	B	-	B	A	A	A	A	B	-	B	A	B	A	-	B	A	A	B	B	B	A	-	B	A	A	A	A	A	B	A	A	-	B	B	B	-
Ps119050	55	12	AA474-443	Ps001298	AA474-443	Ps118440	0.878794	B	B	A	A	B	-	B	A	B	A	A	A	A	B	A	B	A	-	A	A	B	A	A	B	B	B	A	B	B	A	A	A	A	A	B	A	A	-	B	B	B	A
Ps156565	55	10.8	Ps001298	Ps118440	Ps001172	Ps118440	0.630954	B	B	A	A	B	B	B	A	B	A	-	A	A	B	A	B	-	A	A	A	B	-	A	B	B	B	A	-	B	-	A	A	-	A	B	-	A	A	B	B	B	-
Ps126156	55	11.4	AA474-443	Ps001298	AA474-443	Ps118440	0.757621	B	B	A	A	B	B	B	A	-	A	A	A	A	B	A	B	A	-	-	A	B	A	A	B	B	B	A	A	B	A	A	A	A	-	B	-	A	A	B	B	-	A
Ps126885	55	11.4	AA474-443	Ps001298	AA474-443	Ps118440	1	B	B	A	A	B	B	-	A	B	A	A	A	A	B	A	B	A	B	A	-	B	A	A	B	B	B	A	-	B	-	A	A	A	A	B	-	A	A	B	B	B	A
Ps151138	55	11.1	AA474-443	Ps001298	AA474-443	Ps118440	0.75183	B	B	A	A	B	B	B	A	B	-	A	A	A	B	A	B	A	-	A	A	B	A	-	B	B	B	A	-	B	A	A	A	-	A	B	A	A	A	B	-	-	A
Ps105018	55	12	AA474-443	Ps001298	AA474-443	AA155-365	0.456057	B	B	A	A	B	B	B	A	B	A	A	-	A	B	A	-	A	-	A	A	B	A	A	B	B	B	A	A	B	A	A	A	A	A	B	A	A	A	B	B	B	A
Ps141881	55	11.1	AA474-443	Ps001298	AA474-443	AA155-365	0.639412	B	B	A	A	B	B	B	A	B	-	A	A	-	B	A	B	A	-	A	A	B	A	A	B	B	B	A	-	-	A	A	-	A	A	B	A	A	A	B	B	B	A
Ps143856	55	11.4	AA474-443	Ps001298	AA474-443	Ps118440	0.639412	B	B	A	A	B	B	B	A	B	A	A	A	A	B	A	B	A	-	A	A	-	A	A	B	B	B	A	A	B	A	A	-	A	-	B	A	A	-	B	-	B	A
Ps108781	55	11.4	AA474-443	Ps001298	AA474-443	AA155-365	0.365712	B	B	A	A	B	B	B	A	B	A	A	A	A	B	A	B	A	A	A	A	-	-	A	B	B	B	A	A	B	-	A	A	A	A	B	A	A	A	B	B	B	A
Ps156481	55	11.1	AA474-443	Ps001298	AA474-443	Ps118440	0.87278	-	B	-	A	B	B	B	A	B	A	A	A	A	B	A	B	A	A	A	A	B	A	A	B	B	B	A	-	B	A	A	A	-	-	B	A	A	-	B	B	B	-
Ps139131	55	11.4	AA474-443	Ps001298	AA474-443	Ps118440	0.43488	B	B	A	A	B	-	B	A	B	A	A	A	A	B	A	B	A	A	A	A	B	A	A	B	-	-	A	B	B	A	A	A	-	A	B	A	A	-	B	B	B	A
Ps110678	55	12	AA474-443	Ps001298	AA474-443	Ps118440	1	B	B	A	A	B	B	B	A	B	A	A	A	A	B	A	B	A	B	A	A	B	A	A	B	B	-	A	-	B	A	-	A	A	A	B	A	A	-	B	B	B	A
Ps149083	55	11.4	Ps001298	Ps118440	Ps001172	Ps118440	0.527089	B	B	A	A	B	-	B	-	B	A	-	A	A	B	A	-	A	-	A	A	B	A	A	B	B	B	A	-	B	A	A	A	A	A	B	A	A	A	-	B	B	A
Ps151795	55	11.1	AA474-443	Ps001298	AA474-443	Ps118440	1	B	B	A	A	B	B	B	-	B	A	A	-	A	B	A	B	A	-	A	A	B	-	A	B	B	B	A	A	B	A	A	A	A	-	B	A	A	A	B	-	B	-
Ps104519	55	12.3	AA474-443	Ps001298	AA474-443	Ps118440	0.654721	B	B	A	A	B	B	B	A	-	A	A	A	A	B	A	B	A	A	A	A	B	A	A	B	B	B	A	-	B	A	A	A	A	A	B	A	A	-	B	B	B	A
Ps153355	55	10.8	AA474-443	Ps001298	AA474-443	Ps118440	0.87278	B	B	A	A	B	B	B	A	B	A	A	-	A	B	-	B	-	-	A	A	B	A	A	B	-	B	A	-	B	A	A	A	A	A	-	A	-	A	B	B	B	A
Ps118267	55	12.3	AA474-443	Ps001298	AA474-443	Ps118440	0.445766	B	B	A	A	B	B	B	A	B	A	A	A	A	B	A	B	A	-	A	A	B	A	A	B	-	B	A	-	B	A	A	A	A	A	B	A	A	A	B	B	B	A
Ps111247	55	12	AA474-443	Ps001298	AA474-443	Ps118440	0.546494	B	B	A	-	B	B	B	A	-	A	A	A	A	B	A	B	A	A	A	A	B	A	A	B	B	B	A	A	B	A	A	A	A	A	B	A	A	-	B	B	B	A
Ps143984	55	11.4	AA474-443	Ps001298	AA474-443	Ps118440	0.875896	B	B	A	A	B	-	B	A	B	A	A	A	-	B	A	B	A	-	A	A	B	A	A	B	B	B	A	B	B	A	A	A	-	-	B	A	A	A	-	B	B	A
Ps136887	55	10.8	AA474-443	Ps001298	AA474-443	Ps118440	0.875896	B	B	A	A	B	B	B	A	B	-	A	A	A	B	-	B	A	B	A	A	-	A	A	B	B	B	A	B	B	-	A	A	-	A	B	A	A	A	B	B	B	A
Ps104184	55	12.3	AA474-443	Ps001298	AA474-443	AA155-365	0.654721	B	B	-	A	B	B	B	A	B	A	A	A	A	B	A	B	A	-	A	A	B	A	A	B	B	B	A	-	B	A	A	A	A	A	B	A	A	A	B	B	B	A
Ps150671	55	11.4	AA474-443	Ps001298	AA474-443	Ps118440	0.527089	-	B	A	A	B	B	B	A	B	A	A	A	A	B	A	B	A	-	A	A	B	A	A	B	B	B	-	-	-	A	A	A	A	-	B	A	A	A	-	B	B	A
Ps119135	55	11.7	AA474-443	Ps001298	AA474-443	AA155-365	0.647315	B	B	A	A	B	B	B	A	B	A	A	A	A	-	A	B	A	A	A	A	B	A	A	B	B	B	A	-	B	-	-	A	A	A	B	A	A	-	B	B	B	A
Ps112064	55	12	AA474-443	Ps001298	AA474-443	Ps118440	0.763025	B	B	A	A	B	B	B	A	B	A	A	A	A	B	A	B	A	A	A	A	B	A	A	B	B	B	A	B	B	A	A	A	A	A	B	A	A	-	B	B	B	A
Ps121667	55	11.7	AA474-443	Ps001298	AA474-443	Ps118440	0.647315	B	B	A	A	B	B	B	A	B	A	A	A	A	B	A	B	A	B	A	A	B	A	A	B	B	B	A	-	-	A	A	A	A	A	B	A	A	A	B	-	B	-
Ps156302	55	10.2	AA474-443	Ps001298	AA474-443	Ps105493	0.262332	-	-	A	A	-	B	B	A	-	A	A	A	A	-	A	-	A	B	A	A	-	A	A	B	B	B	A	-	B	A	A	A	A	B	B	A	A	A	B	B	B	A
Ps113856	55	12.6	AA474-443	Ps001298	AA474-443	Ps118440	0.763025	B	B	A	A	B	B	B	A	B	A	A	A	A	B	A	B	A	-	A	A	B	A	A	B	B	B	A	-	B	A	A	A	A	A	B	A	A	-	B	B	B	A
Ps148574	55	11.1	AA474-443	Ps001298	AA474-443	Ps118440	0.527089	B	B	A	A	B	B	-	A	B	-	A	-	A	B	A	B	A	A	A	A	B	A	A	B	B	B	A	-	-	A	A	A	A	A	B	A	A	-	-	B	B	A
Ps141375	55	11.7	Ps001298	Ps118440	Ps001172	Ps118440	0.875896	B	B	A	A	B	B	B	A	B	A	-	A	A	B	A	B	A	-	A	A	B	A	A	-	B	B	A	-	B	A	A	A	A	-	B	A	-	A	B	B	B	A
Ps111222	55	11.7	AA474-443	Ps001298	AA474-443	Ps118440	0.365712	-	B	A	A	B	B	-	A	B	A	A	A	A	B	A	B	A	-	A	A	B	A	A	B	B	B	A	A	B	A	A	A	A	A	B	A	A	A	B	B	-	A
Ps144600	55	11.7	AA474-443	Ps001298	AA474-443	AA155-365	0.875896	B	B	A	A	-	B	B	A	B	A	A	A	A	B	A	B	A	-	A	A	B	A	A	B	B	B	A	B	B	A	A	-	A	-	B	A	A	-	-	B	B	A
Ps119791	55	11.7	AA474-443	Ps001298	AA474-443	Ps118440	0.647315	B	B	A	A	B	B	B	-	B	A	A	A	A	B	A	-	A	-	A	A	B	A	A	B	B	B	A	B	-	A	A	A	A	A	B	A	A	A	B	B	B	A
Ps146978	55	10.8	AA474-443	Ps001298	AA474-443	Ps118440	1	B	B	A	A	B	-	B	A	B	A	A	-	A	B	A	B	A	B	A	A	B	A	-	B	B	B	A	B	-	A	A	A	A	A	-	-	A	-	B	B	B	A
Ps115240	55	11.7	AA474-443	Ps001298	AA474-443	AA155-365	0.445766	B	B	-	A	B	B	B	A	B	A	A	A	A	B	A	-	A	A	A	A	B	A	A	B	B	B	A	A	B	A	A	A	A	-	B	A	A	-	B	B	B	A
Ps151408	55	11.1	AA474-443	Ps001298	AA474-443	Ps118440	0.75183	B	B	A	A	B	-	B	A	-	A	A	A	-	B	A	B	A	-	A	A	B	A	A	B	B	B	A	A	B	A	A	-	A	-	B	A	A	B	B	B	B	A
Ps162990	55	10.5	AA474-443	Ps001298	AA474-443	Ps118440	0.738883	B	B	A	A	B	B	B	A	-	-	A	A	A	B	A	B	-	-	A	A	B	A	A	B	-	B	A	-	B	-	-	A	A	A	-	A	A	-	B	B	-	A
Ps159045	55.2	8.9	Ps001298	Ps118440	Ps001298	AA155-365	0.745603	B	B	A	A	A	B	B	A	B	-	A	-	A	B	A	-	A	-	A	A	B	A	-	B	B	B	A	-	B	A	A	A	A	B	-	A	A	-	-	B	B	A
Ps131845	55.2	11.7	Ps001298	Ps118440	Ps001298	AA155-365	0.757621	B	B	A	A	A	B	B	A	B	A	A	A	A	B	A	B	A	B	A	A	B	A	A	B	B	B	-	-	B	A	A	A	A	-	B	A	A	A	B	B	B	A
Ps157391	55.2	10.8	Ps001298	Ps118440	Ps001298	AA155-365	0.33039	-	-	A	-	A	B	B	A	B	A	A	A	A	B	A	B	A	B	A	A	B	A	A	B	-	B	-	A	-	A	-	A	A	A	B	A	A	-	B	B	-	A
Ps118440	55.5						0.647315	B	B	A	A	A	B	B	A	B	A	A	A	A	B	A	B	A	A	A	A	B	A	-	-	B	B	A	-	B	A	A	-	A	A	B	A	A	-	B	B	B	A
Ps001467	55.5	22.6	Ps118440	Ps105493	Ps001298	AA155-365	0.878794	B	B	A	A	A	B	B	A	B	A	A	A	A	B	A	B	A	-	A	A	B	A	A	B	B	B	-	B	B	A	A	A	A	-	B	A	A	-	B	B	B	A
Ps156799	55.5	10.5	Ps118440	Ps105493	Ps001298	AA155-365	0.87278	B	B	A	A	A	-	B	A	B	-	A	A	A	B	A	B	A	-	A	-	B	-	A	B	B	B	A	B	B	A	A	A	A	A	B	A	-	-	B	-	B	A
Ps136336	55.5	10.8	Ps118440	Ps105493	Ps001298	AA155-365	0.43488	B	B	A	A	A	B	B	A	B	A	A	A	A	B	A	B	A	-	A	-	B	A	A	B	B	B	A	B	B	A	A	A	A	A	-	A	-	A	B	-	-	A
Ps151252	55.5	11.1	Ps118440	Ps105493	Ps001298	AA155-365	0.342782	B	B	A	A	A	B	B	A	B	A	A	A	A	B	A	B	A	-	A	A	B	A	A	B	B	B	A	B	B	A	A	-	A	A	-	A	A	-	B	B	-	A
Ps111689	55.5	11.7	Ps118440	Ps105493	Ps001298	Ps101357	0.763025	B	B	A	A	A	B	B	A	B	A	A	A	A	B	-	B	A	A	-	A	B	-	A	B	B	B	A	B	B	A	A	A	A	A	B	A	A	A	B	B	B	A
Ps133283	55.5	11.7	Ps118440	Ps105493	Ps001298	AA155-365	0.537094	B	B	A	A	A	B	B	A	B	A	A	A	A	B	A	B	A	-	A	A	B	A	A	-	B	B	A	B	B	A	A	A	A	A	B	A	A	-	B	-	B	-
Ps107069	55.5	11.7	Ps001298	Ps118440	Ps001298	Ps105493	0.763025	B	B	A	-	A	B	B	A	B	-	A	A	A	B	A	B	A	A	A	-	B	A	A	B	B	B	A	B	B	A	A	A	A	A	B	A	A	A	B	B	B	A
Ps163506	55.5	9.6	Ps001298	Ps118440	Ps001298	Ps105493	0.61209	B	B	-	A	A	B	B	A	B	A	A	-	-	B	A	B	-	-	-	-	B	A	A	B	B	B	A	-	B	A	A	A	A	A	B	A	-	-	B	-	-	A
Ps155775	55.5	10.5	Ps118440	Ps105493	Ps001298	AA155-365	0.630954	B	B	A	A	A	B	B	-	B	-	A	A	A	B	A	B	A	A	A	-	B	A	A	B	B	-	A	B	-	-	A	A	A	A	-	A	A	-	B	B	B	A
Ps145710	55.5	10.5	Ps118440	Ps105493	Ps001298	AA67-403	0.75183	B	B	A	A	A	B	B	A	B	-	A	A	A	B	A	B	A	-	-	-	B	A	A	B	B	B	A	B	B	A	A	A	-	A	B	A	A	A	-	B	B	A
Ps131064	55.5	11.4	Ps118440	Ps105493	Ps001298	AA155-365	0.354539	B	B	A	A	A	B	B	A	B	A	A	A	A	B	A	B	A	A	A	A	B	A	A	B	B	B	A	B	-	A	A	A	A	A	-	A	A	-	-	B	B	-
Ps134518	55.5	11.4	Ps001298	Ps118440	Ps001298	Ps105493	0.757621	B	B	A	A	A	B	B	-	-	A	A	A	A	B	-	B	A	-	A	A	B	A	A	B	B	B	A	B	B	A	A	-	A	A	B	A	A	A	B	B	B	A
Ps122059	55.5	11.7	Ps001298	Ps118440	Ps001298	Ps105493	0.647315	B	B	A	A	A	B	B	A	B	A	A	A	A	B	A	B	A	A	-	A	B	A	A	B	B	-	A	B	B	A	A	-	-	A	B	A	A	A	B	-	B	A
Ps140087	55.5	11.1	Ps118440	Ps105493	Ps001298	AA155-365	0.639412	B	B	-	A	A	B	B	A	B	A	A	A	A	B	A	B	A	-	A	A	B	A	A	B	B	B	A	B	B	A	-	A	A	A	B	A	A	-	-	B	B	A
Ps132816	55.5	11.4	Ps118440	Ps105493	Ps001298	AA155-365	0.354539	B	B	A	A	A	B	B	A	-	A	A	A	A	-	A	B	A	A	A	-	B	A	A	-	B	B	A	B	B	A	A	A	A	-	B	A	A	A	B	B	B	A
Ps143346	55.5	11.4	Ps118440	Ps105493	Ps001298	AA155-365	0.43488	B	B	A	A	A	B	B	A	B	A	A	A	A	-	A	B	A	-	A	A	B	A	A	-	B	B	A	B	-	A	A	A	A	A	B	A	-	-	B	B	B	A
Ps107640	55.5	12.3	Ps118440	Ps105493	Ps001298	Ps105493	0.546494	B	B	A	A	A	B	B	A	B	A	-	A	A	B	A	B	A	A	A	A	B	A	A	-	B	B	A	-	B	A	A	A	A	-	B	A	A	A	B	B	B	A
Ps155323	55.5	10.8	Ps118440	Ps105493	Ps001298	Ps105493	0.630954	B	B	A	A	A	-	B	A	B	A	A	A	A	B	-	-	-	-	A	A	B	A	A	B	B	B	A	-	B	A	A	-	A	-	B	A	A	A	B	B	B	A
Ps119567	55.5	11.4	Ps001298	Ps118440	Ps001298	Ps105493	0.445766	B	B	A	A	A	B	B	A	B	A	A	A	A	B	A	-	A	-	A	A	B	A	A	B	B	-	A	B	B	A	A	A	A	-	B	A	A	A	-	B	B	A
Ps160387	55.5	10.2	Ps118440	Ps105493	Ps001298	AA155-365	0.33039	B	B	A	A	A	-	B	A	-	A	A	A	A	B	A	-	A	-	A	A	B	A	A	B	B	B	A	B	B	-	A	A	A	A	B	-	A	-	B	B	B	A
Ps155480	55.5	10.2	Ps118440	Ps105493	Ps001298	AA155-365	0.149541	B	B	A	A	A	-	B	A	B	-	A	A	-	-	A	-	A	A	A	A	B	A	A	B	B	-	A	B	B	A	A	A	A	A	-	A	A	A	B	B	B	A
Ps155488	55.5	10.8	Ps118440	Ps105493	Ps001298	AA155-365	0.630954	B	-	A	A	A	B	B	A	B	A	A	A	A	B	A	B	A	-	A	A	B	A	-	B	B	B	A	B	-	A	A	A	A	-	B	-	A	-	B	-	B	A
Ps122270	55.5	11.7	Ps118440	Ps105493	Ps001298	AA155-365	0.445766	B	B	A	A	A	B	B	A	B	A	A	A	A	-	-	B	A	A	A	A	B	A	A	B	B	B	A	B	B	A	A	A	A	A	B	A	A	-	B	B	B	A
Ps146892	55.5	11.1	Ps118440	Ps105493	Ps001298	AA155-365	0.75183	B	-	A	A	A	B	B	A	B	A	A	A	A	B	A	B	A	-	A	A	B	A	-	-	B	B	A	B	B	A	A	A	A	-	B	A	-	A	B	B	B	A
Ps141276	55.5	11.4	Ps118440	Ps105493	Ps001298	Ps105493	0.43488	B	B	A	A	A	B	B	A	B	-	A	A	A	B	A	B	A	-	A	A	B	A	-	-	B	B	A	A	B	A	A	A	A	-	-	A	A	A	B	-	B	A
Ps108986	55.5	11.7	Ps118440	Ps105493	Ps001298	AA155-365	0.2278	B	B	A	A	A	B	B	A	B	A	A	A	A	B	A	B	A	A	A	A	B	A	A	B	B	-	A	B	B	A	A	A	A	A	B	A	A	A	-	B	-	A
Ps162856	55.5	9.6	Ps118440	Ps105493	Ps001298	AA155-365	0.504985	B	B	A	-	A	B	B	A	-	A	-	A	A	-	A	-	A	A	A	A	B	A	A	B	B	B	-	B	B	-	A	A	A	A	B	-	A	-	-	-	B	A
Ps161843	55.5	9.9	Ps118440	Ps105493	Ps001298	AA155-365	0.621873	B	B	A	A	A	B	B	A	-	A	-	A	A	B	A	B	A	-	A	A	B	A	A	B	-	B	A	-	B	A	A	A	-	-	-	A	A	B	B	B	B	A
Ps137338	55.5	11.1	Ps118440	Ps105493	Ps001298	AA155-365	0.639412	B	B	A	A	A	B	B	A	B	A	-	A	A	B	A	B	A	-	A	-	B	A	A	B	B	-	A	B	B	A	A	A	A	A	B	A	A	-	B	B	B	A
Ps152085	55.5	11.1	Ps118440	Ps105493	Ps001298	AA155-365	0.342782	B	B	A	A	A	-	B	-	B	A	A	A	A	B	A	B	A	A	A	A	B	A	A	-	B	B	-	B	-	A	A	A	A	A	B	A	A	-	B	B	B	A
Ps147118	55.5	10.5	Ps001298	Ps118440	Ps001298	Ps105493	1	B	B	A	A	A	B	B	A	B	-	-	-	A	B	A	B	A	-	A	-	B	A	A	B	B	B	A	B	B	A	A	A	A	A	B	-	A	A	B	B	B	A
Ps159763	55.5	10.2	Ps118440	Ps105493	Ps001298	AA155-365	0.745603	B	B	A	A	A	B	B	A	B	A	-	-	A	B	A	B	A	A	A	A	-	A	A	B	B	B	A	B	B	A	-	A	A	-	B	A	A	-	-	B	B	A
Ps130734	55.5	11.1	Ps118440	Ps105493	Ps001298	Ps101357	0.537094	B	B	A	A	A	B	B	A	-	A	A	A	A	B	A	B	-	A	-	A	B	A	A	B	B	B	A	B	B	A	A	A	A	A	B	-	A	A	B	-	B	A
Ps156386	55.5	10.2	Ps001298	Ps118440	Ps001298	Ps105493	0.87278	B	B	A	A	A	B	B	A	B	A	A	A	A	B	-	B	A	-	A	A	B	A	A	B	B	-	A	B	B	-	A	A	-	A	B	A	A	B	B	B	B	A
Ps163654	55.5	9.3	Ps118440	Ps105493	Ps001298	Ps105493	0.61209	B	-	-	A	A	-	B	A	B	A	A	A	A	B	A	B	A	A	-	-	B	A	A	B	B	-	-	-	B	A	A	A	-	A	-	A	A	A	B	B	-	-
Ps156291	55.8	10.2	Ps118440	Ps105493	Ps118440	AA67-403	0.87278	B	B	A	-	A	B	B	A	-	A	A	A	A	B	A	B	-	-	-	A	B	A	A	B	B	B	A	B	B	A	A	A	A	-	B	-	-	A	B	-	B	A
Ps129841	55.8	9.7	Ps118440	Ps105493	Ps118440	AA155-365	1	B	B	A	A	A	B	B	A	B	A	A	A	A	B	-	B	A	A	A	-	B	A	A	B	B	B	A	-	B	A	A	-	A	-	B	A	A	B	B	B	B	-
Ps135539	55.8	10.8	Ps118440	Ps105493	Ps118440	AA155-365	0.274299	-	B	A	A	-	B	-	A	B	A	A	A	A	B	A	B	A	-	A	A	B	A	A	B	B	-	A	B	-	A	A	A	A	A	B	A	A	A	B	B	B	-
Ps161733	55.8	8.6	Ps118440	Ps105493	Ps118440	AA155-365	0.41108	B	B	A	A	A	-	B	A	B	A	A	A	A	B	A	B	-	A	A	A	B	A	-	B	B	B	-	B	B	A	A	-	A	A	B	-	A	-	B	-	-	A
Ps155902	55.8	9.9	Ps118440	Ps105493	Ps118440	AA67-403	0.630954	B	B	A	-	A	B	B	A	B	-	-	A	A	B	A	B	A	-	-	-	B	A	A	B	B	B	A	B	B	A	A	A	A	A	B	-	-	-	B	B	B	A
Ps107420	55.8	11.7	Ps118440	Ps105493	Ps118440	AA155-365	0.763025	B	B	A	A	-	B	B	A	B	A	A	A	A	B	A	B	A	A	A	A	B	A	-	B	B	B	A	B	B	-	A	A	A	A	B	A	A	-	B	B	B	A
Ps130345	55.8	9.7	Ps118440	Ps105493	Ps118440	AA155-365	0.757621	B	B	A	A	A	B	B	A	B	A	A	A	-	B	-	B	A	A	A	-	B	A	A	B	B	-	A	B	B	A	A	A	A	A	B	A	A	-	B	B	B	A
Ps129224	55.9	9.7	Ps118440	Ps105493	Ps118440	AA155-365	0.757621	B	B	A	A	A	B	B	A	B	-	A	A	A	B	A	B	A	B	A	A	B	A	-	B	B	B	A	B	B	A	A	A	A	A	B	A	-	-	B	-	B	A
[truncated: 4,164 more rows]
[truncated: 6 more columns]

## Sheet: PsLGII
SnpName	Genetic Position (cM)	Two-point LOD of linkage to the closest marker in the framework map	marker of the framework map on Left side of the placed marker	marker of the framework map on Right side of the placed marker	left marker of the framework map that delimit an interval into which the placed marker lies with a LOD score of at least 3.0	right marker of the framework map that delimit an interval into which the placed marker lies with a LOD score of at least 3.0	χ2	BAP8_043	BAP8_130	BAP8_184	BAP8_066	BAP8_142	BAP8_172	BAP8_186	BAP8_243	BAP8_018	BAP8_070	BAP8_136	BAP8_198	BAP8_006	BAP8_051	BAP8_057	BAP8_060	BAP8_109	BAP8_129	BAP8_183	BAP8_195	BAP8_215	BAP8_024	BAP8_110	BAP8_131	BAP8_165	BAP8_197	BAP8_203	BAP8_056	BAP8_094	BAP8_099	BAP8_126	BAP8_004	BAP8_116	BAP8_166	BAP8_177	BAP8_202	BAP8_029	BAP8_037	BAP8_047	BAP8_082	BAP8_090	BAP8_104
Ps160979	-3.1	7.2	NA	Ps100872	NA	Ps000201	0.138982	B	A	A	-	-	-	A	B	A	B	A	B	B	B	A	-	B	B	B	A	A	B	A	B	B	-	B	B	B	A	A	B	B	-	B	-	-	A	B	-	-	-
Ps152737	-2.9	7.8	NA	Ps100872	NA	Ps000201	0.149541	-	A	A	-	B	B	A	B	A	B	A	B	B	B	A	A	B	B	B	A	A	B	A	B	B	B	B	B	-	-	-	B	B	A	B	A	-	A	-	B	-	A
Ps157402	-2.9	7.8	NA	Ps100872	NA	Ps000201	0.194366	B	A	A	B	B	-	A	B	A	B	-	-	B	B	A	A	B	B	-	A	A	B	A	B	B	B	B	-	-	A	A	B	B	A	B	A	B	-	B	B	-	-
Ps139002	-2.8	8.3	NA	Ps100872	NA	Ps000201	0.159854	B	A	A	B	B	B	A	B	A	B	A	B	B	B	A	A	-	B	B	A	A	B	A	B	B	B	B	B	-	-	-	B	B	A	-	A	B	A	B	B	B	A
Ps137732	-2.7	8.6	NA	Ps100872	NA	Ps000201	0.159854	B	-	A	-	B	A	A	A	A	B	A	-	B	-	A	A	B	B	B	B	A	B	A	B	-	B	B	B	-	A	A	B	B	A	B	A	B	A	B	B	B	B
Ps133205	-2.7	8.6	NA	Ps100872	NA	Ps000201	0.0640775	B	-	A	B	B	B	A	B	-	B	A	-	B	B	A	A	B	B	B	A	A	B	A	B	B	B	-	B	B	A	A	B	B	A	B	A	B	A	-	B	B	A
Ps124918	-2.7	8.6	NA	Ps100872	NA	Ps000201	0.122823	B	A	A	B	B	B	A	B	A	B	A	B	-	B	A	A	-	B	B	A	A	B	A	B	B	B	B	B	-	-	A	B	B	-	B	A	B	A	B	B	B	A
Ps132106	-2.7	8.6	NA	Ps100872	NA	Ps000201	0.122823	B	A	A	B	B	B	A	B	A	B	A	B	B	B	-	A	B	B	B	A	A	B	A	B	B	B	B	B	-	A	A	B	B	A	B	A	-	A	B	B	B	-
Ps120889	-2.6	8.9	NA	Ps100872	NA	Ps000201	0.0934478	B	-	A	B	-	-	A	B	A	B	A	B	-	B	A	A	B	B	B	A	A	B	A	B	B	B	B	B	B	A	-	B	B	A	B	A	B	A	B	B	B	A
Ps119250	-2.6	9.2	NA	Ps100872	NA	Ps000201	0.0934478	B	A	A	B	B	-	A	B	A	B	-	B	B	B	A	A	B	B	B	A	A	-	A	B	B	B	B	B	B	A	A	-	B	A	B	A	B	A	B	B	B	A
Ps117078	-2.6	8.9	NA	Ps100872	NA	Ps000201	0.285751	B	A	A	B	B	B	A	B	A	B	A	B	-	B	A	A	-	B	B	A	A	-	A	B	B	B	B	B	-	A	A	B	B	A	B	A	B	A	B	B	B	A
Ps129080	-2.6	8.9	NA	Ps100872	NA	Ps000201	0.217044	B	A	A	B	B	B	A	B	A	B	A	B	-	B	A	A	B	B	B	A	A	B	A	B	-	-	B	B	B	A	A	B	B	A	B	A	-	A	B	B	B	A
Ps114847	-2.6	9.2	NA	Ps100872	NA	Ps000201	0.169912	B	A	A	B	B	B	A	B	A	B	-	B	-	B	A	A	B	B	B	A	A	-	A	B	B	B	B	B	-	A	A	B	B	A	B	A	B	A	B	B	-	A
Ps114486	-2.6	8.9	NA	Ps100872	NA	Ps000201	0.0474254	B	A	-	B	B	B	-	B	A	B	A	-	B	B	A	A	B	B	B	A	A	B	A	B	B	B	B	B	B	A	A	B	B	A	B	A	B	A	B	-	B	A
Ps162660	-1.5	8.3	NA	Ps100872	NA	Ps000201	0.317311	-	A	A	-	-	B	A	A	A	-	A	-	B	B	A	A	B	B	B	A	-	B	A	B	B	B	B	-	B	A	-	B	B	A	B	-	B	A	B	B	-	A
Ps161697	-1.5	8.6	NA	Ps100872	NA	Ps000201	0.249817	B	A	A	B	B	A	A	-	A	-	A	B	-	B	-	A	-	B	B	B	-	B	A	B	B	B	B	B	B	A	A	-	B	A	B	A	-	-	B	-	B	A
Ps156910	-1.4	9.1	NA	Ps100872	NA	Ps000201	0.42334	B	A	A	-	-	A	A	A	A	B	A	B	B	B	A	A	-	B	B	B	A	B	A	B	B	B	B	B	B	A	A	-	-	A	-	-	B	A	-	B	B	-
Ps159411	-1.4	8.9	NA	Ps100872	NA	Ps000201	0.33039	B	A	A	B	B	B	-	A	A	B	A	B	B	B	A	A	-	B	-	A	-	B	A	B	B	-	B	-	B	A	-	-	B	A	B	A	B	A	-	B	-	A
Ps146710	-1.4	9.4	NA	Ps100872	NA	Ps000201	0.342782	B	A	A	B	B	B	A	A	A	B	A	-	B	B	A	-	B	B	B	A	A	-	-	B	B	B	B	B	-	A	A	B	B	A	B	A	-	A	-	B	-	A
Ps127188	-1.3	10.3	NA	Ps100872	NA	Ps000201	0.354539	B	A	A	B	B	A	A	A	-	-	A	-	B	-	A	A	B	B	B	B	A	B	A	B	-	B	B	B	B	A	A	B	B	A	B	A	B	A	B	B	B	A
Ps136128	-1.3	10	NA	Ps100872	NA	Ps000201	0.159854	B	-	A	B	B	A	A	A	A	B	A	B	-	-	A	A	B	B	B	B	A	B	-	B	-	B	B	B	B	A	A	B	B	A	B	A	B	A	B	B	B	A
Ps133509	-1.3	10	NA	Ps100872	NA	Ps000201	0.354539	B	A	A	B	-	-	A	A	A	B	A	B	B	B	A	A	B	B	B	A	-	B	A	B	B	-	B	B	-	A	A	B	B	A	B	A	-	A	B	B	B	A
Ps117193	-1.3	10.3	NA	Ps100872	NA	Ps000201	0.169912	B	A	A	B	B	A	A	-	A	B	A	B	B	B	A	A	-	B	B	B	A	B	-	B	B	B	B	B	-	A	A	B	B	A	B	A	-	A	B	B	B	A
Ps131402	-1.3	10	NA	Ps100872	NA	Ps000201	0.217044	B	A	-	B	B	B	A	A	A	B	A	B	B	B	A	A	B	B	-	A	A	-	-	B	B	B	B	B	B	A	A	B	B	A	-	A	B	A	-	B	B	A
Ps120122	-1.3	10.3	NA	Ps100872	NA	Ps000201	0.285751	B	A	A	B	B	B	A	A	A	B	A	B	-	B	A	A	B	B	-	A	A	B	A	B	B	B	B	B	B	A	A	-	B	A	B	A	B	A	B	B	B	A
Ps117354	-1.3	10.3	NA	Ps100872	NA	Ps000201	0.0474254	B	-	A	B	B	B	A	A	A	B	A	B	B	B	-	A	B	B	B	A	A	B	A	B	B	B	B	B	B	A	A	B	B	A	B	-	B	A	B	B	-	A
Ps137282	-1.3	10	NA	Ps100872	NA	Ps000201	0.274299	B	A	A	B	B	A	A	A	-	B	A	B	B	B	A	-	B	B	B	B	A	B	A	-	-	B	B	B	B	A	A	B	B	A	B	A	B	A	B	-	-	A
Ps111252	-1.2	10.9	NA	Ps100872	NA	Ps000201	0.0348085	B	A	A	B	B	-	A	B	A	B	-	B	B	B	-	A	B	B	B	-	A	B	A	B	B	B	B	B	B	A	A	B	B	A	B	A	B	A	B	B	B	A
Ps118009	-1.2	10.6	NA	Ps100872	NA	Ps000201	0.445766	B	A	A	B	-	-	A	A	A	B	A	B	B	B	A	A	B	B	B	A	A	B	A	-	-	-	B	B	B	A	A	B	B	A	B	A	B	A	B	B	B	A
Ps111436	-1.2	10.6	NA	Ps100872	NA	Ps000201	0.131668	B	A	A	B	B	B	A	-	A	B	A	B	A	B	A	A	-	-	B	B	A	B	A	B	B	B	B	B	B	A	A	B	B	A	B	A	B	A	B	B	B	-
Ps104765	-1.2	10.9	NA	Ps100872	NA	Ps000201	0.10105	B	A	A	B	B	B	A	-	A	B	A	B	B	B	A	A	B	B	B	A	A	B	A	B	B	B	B	-	B	A	A	B	B	A	B	A	B	A	B	B	B	-
Ps103422	-1.2	10.9	NA	Ps100872	NA	Ps000201	0.179712	B	A	A	B	B	B	A	A	A	B	A	B	B	B	A	A	B	B	B	A	A	B	A	B	B	B	B	B	B	-	A	B	B	A	B	A	B	A	B	B	-	A
Ps100872	0						0.0768432	B	A	A	B	B	B	A	A	A	B	-	B	B	B	A	A	B	B	B	B	A	B	A	B	-	B	B	B	B	A	A	B	B	A	B	A	B	A	B	B	B	A
Ps117143	0	12.3	Ps100872	Ps000201	NA	Ps000201	0.0934478	B	A	A	B	B	B	A	A	A	B	A	B	-	B	A	A	B	B	B	B	A	-	A	B	B	B	B	B	B	A	-	B	B	A	B	A	B	A	B	-	B	-
Ps131360	0	12.3	NA	Ps100872	NA	Ps000201	0.122823	B	A	A	-	B	B	A	-	A	-	A	B	B	B	A	A	B	B	B	B	A	B	A	B	-	B	B	B	B	A	-	B	B	A	-	A	B	A	B	B	B	A
Ps162547	0	10.2	NA	Ps100872	NA	Ps000201	0.182422	B	A	A	B	B	B	A	A	A	-	A	B	B	-	A	-	B	B	B	B	A	-	-	-	B	B	B	B	B	A	A	B	B	A	B	-	B	A	-	-	-	A
Ps145167	0	11.4	NA	Ps100872	NA	Ps000201	0.205903	B	A	A	B	B	-	-	A	A	B	A	B	-	-	-	A	B	B	B	-	A	B	A	B	B	B	B	-	B	A	A	B	B	A	B	A	-	A	B	B	B	A
Ps118132	0	12.3	NA	Ps100872	NA	Ps000201	0.0934478	B	A	A	B	B	-	A	A	A	B	A	B	-	B	-	A	B	B	B	B	A	B	A	B	B	B	B	B	B	A	A	-	B	A	B	A	B	A	B	B	B	A
Ps160816	0	10.5	Ps100872	Ps000201	NA	Ps000201	0.138982	B	-	-	B	-	B	A	A	A	-	A	B	B	B	A	A	B	B	-	B	A	B	-	B	B	B	B	-	B	A	A	-	B	A	-	-	B	A	B	-	B	A
Ps151490	0	11.7	NA	Ps100872	NA	Ps000201	0.113846	B	A	A	B	B	B	-	A	A	B	A	B	B	B	A	A	B	B	-	B	A	B	-	-	-	B	B	B	-	A	A	B	B	A	B	-	B	A	B	B	B	A
Ps103086	0	12.9	NA	Ps100872	NA	Ps000201	0.179712	B	A	A	B	B	-	A	A	A	-	A	B	-	B	A	A	B	B	B	B	A	B	A	B	B	B	B	B	B	A	A	B	B	A	B	A	B	A	B	B	B	A
Ps102249	0	13.2	Ps100872	Ps000201	NA	Ps000201	0.140369	B	A	A	B	B	-	A	A	A	B	A	B	-	B	A	A	B	B	B	B	A	B	A	B	B	B	B	B	B	A	A	B	B	A	B	A	B	A	B	B	B	A
Ps150775	0	11.7	NA	Ps100872	NA	Ps000201	0.205903	-	A	A	B	-	-	-	A	A	-	-	B	-	B	A	A	B	B	B	B	A	B	A	B	B	B	B	B	B	A	A	B	B	A	B	A	B	A	-	B	B	A
Ps120986	0	12.3	NA	Ps100872	NA	Ps000201	0.169912	-	A	A	B	B	B	A	A	A	B	A	B	B	B	A	A	B	B	B	B	A	B	A	B	B	B	B	B	B	A	A	-	B	A	B	A	B	A	B	-	B	A
Ps103973	0	12.9	NA	Ps100872	NA	Ps000201	0.179712	-	A	A	B	B	B	A	A	A	B	A	B	-	B	A	A	B	B	B	B	A	B	A	B	B	-	B	B	B	A	A	B	B	A	B	A	B	A	B	B	B	A
Ps111402	0	12.6	NA	Ps100872	NA	Ps000201	0.131668	B	A	A	-	B	B	A	A	A	B	A	B	-	B	A	A	B	B	B	B	A	B	A	B	B	B	B	B	B	A	A	B	B	A	B	A	B	A	B	-	B	A
Ps146926	0	11.7	Ps100872	Ps000201	NA	Ps000201	0.0577796	B	A	A	B	B	B	A	A	A	B	-	B	B	-	A	A	B	B	B	B	A	B	A	-	B	B	B	B	B	A	A	B	B	-	B	A	B	A	B	-	B	-
Ps116894	0	12.3	NA	Ps100872	NA	Ps000201	0.285751	B	A	A	-	B	B	A	A	A	B	A	-	B	B	A	A	-	-	B	B	A	B	A	B	B	B	B	B	B	A	A	B	B	A	B	A	B	A	-	B	B	A
Ps153019	0	11.4	NA	Ps100872	NA	Ps000201	0.0781691	B	A	A	B	B	B	A	A	A	B	-	B	-	-	A	A	B	B	B	B	A	B	-	B	B	-	B	B	-	A	-	B	B	A	B	A	B	A	B	B	B	A
Ps158667	0	10.8	NA	Ps100872	NA	Ps000201	0.516412	B	A	A	B	B	-	A	A	A	-	A	-	B	-	A	A	B	B	B	B	A	-	A	B	B	B	-	B	B	A	A	B	-	-	B	A	-	A	B	B	B	A
Ps137489	0	12	NA	Ps100872	NA	Ps000201	0.0858128	B	A	A	B	B	B	A	A	-	B	-	B	-	B	A	A	B	B	B	B	A	B	-	B	B	-	B	B	B	A	A	B	B	A	B	A	B	A	-	B	B	A
Ps161657	0	10.5	Ps100872	Ps000201	NA	Ps000201	0.0325828	B	-	-	B	B	-	A	A	-	-	A	B	B	-	A	A	-	B	B	B	A	B	-	B	B	B	B	B	B	-	A	B	B	A	B	A	B	A	B	B	B	-
Ps116458	0	12.3	Ps100872	Ps000201	NA	Ps000201	0.0934478	B	A	A	B	B	B	A	A	A	B	A	B	B	B	A	A	B	B	B	B	A	B	-	B	B	B	B	-	B	A	A	B	B	A	B	A	-	A	B	B	B	-
Ps142300	0	12	NA	Ps100872	NA	Ps000201	0.43488	B	A	A	B	B	B	A	A	A	-	A	-	B	B	A	A	B	B	B	B	A	B	A	-	-	-	B	B	B	A	A	B	B	A	B	A	B	A	B	B	B	A
Ps131294	0	12.3	NA	Ps100872	NA	Ps000201	0.217044	-	A	A	B	B	-	A	A	A	B	-	B	-	B	A	A	B	B	B	B	A	B	A	-	B	B	B	B	B	A	A	B	B	A	B	A	B	A	B	B	B	A
Ps114363	0	12.3	NA	Ps100872	NA	Ps000201	0.0221679	B	A	A	B	B	B	-	A	A	B	A	B	B	B	-	A	B	B	-	B	A	B	-	B	B	B	B	B	B	-	A	B	B	A	B	A	B	A	B	B	B	A
Ps109822	0	12.9	NA	Ps100872	NA	Ps000201	0.131668	B	A	A	B	B	B	A	A	A	B	-	B	-	B	A	A	-	B	B	B	A	B	A	B	B	B	B	B	B	A	A	B	-	A	B	A	B	A	B	B	B	A
Ps152932	0	11.4	NA	Ps100872	NA	Ps000201	0.262332	B	-	A	B	-	-	A	A	A	B	-	B	B	B	A	A	-	B	B	B	A	B	A	B	B	B	B	B	-	A	A	B	-	A	B	A	B	A	B	B	B	A
Ps153212	0	11.4	NA	Ps100872	NA	Ps000201	0.0781691	B	A	A	B	-	B	A	A	A	B	-	B	B	B	A	A	B	B	B	B	A	B	-	-	B	B	B	B	B	-	-	B	B	A	B	A	-	A	B	-	-	A
Ps122443	0	12.6	NA	Ps100872	NA	Ps000201	0.0934478	B	A	A	B	B	B	A	A	-	B	-	B	B	-	A	A	B	B	B	B	A	B	A	B	B	B	B	-	B	A	A	B	B	A	B	A	B	A	-	B	B	A
Ps130341	0	12.3	NA	Ps100872	NA	Ps000201	0.0640775	B	-	A	B	-	B	A	A	A	B	-	B	B	B	A	A	B	B	B	-	A	B	A	B	B	B	B	B	B	A	A	B	B	A	B	A	B	A	B	-	B	A
Ps116704	0	12.6	Ps100872	Ps000201	NA	Ps000201	0.0474254	B	A	A	B	B	-	A	A	A	B	-	B	B	B	A	A	B	B	B	B	A	B	-	B	B	B	B	B	B	A	A	B	B	A	B	A	-	-	B	B	B	A
Ps155023	0	11.4	NA	Ps100872	NA	Ps000201	0.0163092	B	A	A	B	B	-	A	A	A	B	-	B	-	B	-	-	B	B	-	B	A	B	-	B	B	B	B	B	B	A	A	B	B	A	B	-	B	A	B	B	B	A
Ps163473	0	10.2	NA	Ps100872	NA	Ps000201	0.236724	B	-	A	B	B	-	A	-	A	B	-	B	-	B	A	A	B	-	-	B	A	B	A	B	B	B	-	B	B	A	A	B	B	A	B	A	B	A	B	-	B	A
Ps157949	0	10.8	NA	Ps100872	NA	Ps000201	0.33039	B	A	A	-	B	-	A	A	A	B	A	B	-	B	-	A	B	B	B	B	A	B	A	B	B	B	-	-	B	A	A	B	-	A	-	A	B	A	B	B	-	A
Ps114023	0	12.6	NA	Ps100872	NA	Ps000201	0.2278	B	A	A	B	B	B	A	A	A	B	A	B	-	B	A	A	B	B	-	B	A	-	A	B	B	B	B	B	B	A	A	B	B	A	-	A	B	A	B	B	B	A
Ps160831	0	10.8	NA	Ps100872	NA	Ps000201	0.249817	B	A	A	B	B	-	A	-	A	B	-	B	B	B	A	A	B	B	B	-	A	-	A	B	B	B	B	-	-	A	-	B	-	A	B	A	B	A	-	B	B	A
Ps125282	0	12	NA	Ps100872	NA	Ps000201	0.122823	B	A	A	B	B	B	A	A	A	B	A	B	B	-	A	A	B	B	B	B	A	B	A	B	B	B	B	-	-	-	A	B	B	A	B	A	B	A	B	B	B	A
Ps125648	0	12.3	NA	Ps100872	NA	Ps000201	0.217044	B	A	A	B	B	-	A	A	A	B	-	B	B	B	A	A	B	B	B	B	A	B	A	B	B	B	B	B	-	A	A	B	B	A	B	A	-	A	B	-	B	A
Ps129797	0	12	NA	Ps100872	NA	Ps000201	0.122823	B	A	A	B	B	B	A	A	-	B	A	B	-	B	A	A	-	B	B	B	A	B	A	B	B	B	B	B	B	A	A	B	B	A	B	-	B	A	-	B	B	A
Ps126035	0	12	NA	Ps100872	NA	Ps000201	0.122823	B	A	A	B	B	B	A	A	A	B	A	B	B	B	A	A	B	B	B	B	A	-	A	B	B	-	B	B	B	-	A	B	B	A	B	-	B	A	-	B	B	A
Ps127369	0	12	Ps100872	Ps000201	NA	Ps000201	0.0640775	B	A	-	B	B	B	A	A	A	B	A	B	-	B	A	A	B	B	B	-	A	B	A	B	B	B	B	B	B	-	A	B	B	A	B	A	B	A	-	B	B	A
Ps153833	0	11.1	NA	Ps100872	NA	Ps000201	0.149541	B	A	A	B	B	-	A	A	A	B	A	B	B	B	A	A	B	B	B	B	A	-	A	B	B	B	B	B	-	-	A	B	B	-	B	-	B	A	-	B	-	A
Ps100402	0	13.5	Ps100872	Ps000201	NA	Ps000201	0.0579277	B	A	A	B	B	B	A	A	A	B	A	B	B	B	A	A	B	B	B	B	A	B	A	B	B	B	B	B	B	A	A	B	B	-	B	A	B	A	B	B	B	A
Ps128699	0	12	NA	Ps100872	NA	Ps000201	0.0640775	B	A	A	B	B	B	A	A	A	B	A	B	B	B	-	A	B	B	B	B	A	-	-	B	B	B	B	B	B	A	A	B	B	A	B	-	-	A	B	B	B	A
Ps152277	0	11.4	NA	Ps100872	NA	Ps000201	0.262332	B	A	A	B	B	-	A	A	A	-	A	B	B	B	A	A	B	B	-	B	A	-	A	B	-	B	-	B	-	A	A	B	B	-	B	-	B	A	B	B	B	A
Ps125192	0	12	NA	Ps100872	NA	Ps000201	0.0135547	B	-	A	B	B	B	A	A	-	B	A	B	B	B	A	-	B	B	B	B	-	B	A	B	B	B	B	B	B	A	A	B	B	A	-	A	B	A	B	B	B	A
Ps133534	0	12	NA	Ps100872	NA	Ps000201	0.354539	-	A	A	B	-	B	A	A	A	B	A	B	B	B	A	A	B	-	B	B	A	B	A	B	B	B	B	B	B	A	A	-	B	A	B	A	B	A	-	B	B	A
Ps111033	0	12.6	Ps100872	Ps000201	NA	Ps000201	0.131668	B	A	-	B	B	B	A	A	A	-	A	B	B	B	A	A	B	B	B	-	A	B	A	B	B	B	B	B	B	A	A	B	B	A	B	A	B	A	B	-	B	A
Ps159694	0	10.8	NA	Ps100872	NA	Ps000201	0.194366	B	A	A	B	-	-	-	A	-	B	A	B	-	B	A	A	-	B	B	-	A	B	A	B	B	B	B	B	B	A	A	B	B	A	B	A	B	A	-	B	B	A
Ps126443	0	12	Ps100872	Ps000201	NA	Ps000201	0.217044	B	A	A	B	B	-	A	A	A	B	A	B	B	-	A	A	B	B	B	-	A	B	A	B	B	B	B	B	B	A	A	B	-	A	B	A	B	-	B	B	B	A
Ps144747	0	11.7	NA	Ps100872	NA	Ps000201	0.0577796	B	A	A	-	B	B	-	A	A	B	-	-	-	B	A	A	B	B	B	B	A	B	-	B	B	B	B	B	B	A	A	B	B	A	B	-	B	A	B	-	B	A
Ps150163	0	11.4	Ps100872	Ps000201	NA	Ps000201	0.113846	B	A	-	-	B	-	A	A	A	B	A	B	-	B	A	A	B	B	B	B	A	B	A	B	B	B	B	B	-	A	A	B	B	A	-	-	B	A	B	B	B	A
Ps146665	0	11.4	Ps100872	Ps000201	NA	Ps000201	0.0577796	B	A	-	B	-	-	A	A	A	B	A	B	B	B	A	A	B	B	B	B	A	B	A	B	B	B	B	-	B	-	-	B	B	-	B	A	-	A	B	B	B	A
Ps105720	0	12.9	NA	Ps100872	NA	Ps000201	0.0526323	B	A	A	B	B	B	A	A	A	B	A	B	B	B	A	-	B	B	B	B	A	B	A	B	B	B	B	B	B	A	-	B	B	A	B	A	B	A	-	B	B	A
Ps139569	0	11.7	Ps100872	Ps000201	NA	Ps000201	0.0858128	B	A	A	-	B	B	A	A	A	B	A	-	B	B	A	A	B	B	B	B	-	-	-	B	B	B	B	B	B	A	A	B	B	A	-	A	B	A	B	B	B	-
Ps119531	0	12.6	NA	Ps100872	NA	Ps000201	0.0934478	B	A	A	B	B	B	A	A	-	B	-	B	B	B	A	A	B	-	B	-	A	B	A	B	B	B	B	B	B	A	A	B	B	A	B	A	B	A	-	B	B	A
Ps135804	0	11.7	NA	Ps100872	NA	Ps000201	0.274299	B	A	A	B	-	-	A	A	A	B	A	B	-	B	-	A	-	B	B	B	A	B	A	B	B	B	B	-	B	A	A	B	B	A	B	A	B	A	-	B	B	A
Ps163398	0	9.9	NA	Ps100872	NA	Ps000201	0.236724	-	A	A	B	B	-	A	-	A	B	A	B	-	B	-	-	B	B	-	B	A	B	A	B	B	B	B	B	B	A	A	-	-	A	B	-	B	A	-	B	-	A
Ps120471	0	12.3	NA	Ps100872	NA	Ps000201	0.0474254	B	-	A	B	B	-	A	A	A	B	A	B	B	B	A	A	B	B	B	B	-	B	A	B	B	-	B	B	B	A	-	B	B	A	B	A	B	A	B	B	B	A
Ps126543	0	12	NA	Ps100872	NA	Ps000201	0.217044	B	-	A	B	B	B	A	A	A	B	A	-	-	B	A	A	B	B	B	B	A	B	A	B	B	B	B	B	-	A	A	B	-	A	B	A	B	A	B	B	B	A
Ps144827	0	11.4	NA	Ps100872	NA	Ps000201	0.342782	-	A	A	B	B	B	A	A	A	B	A	B	-	-	A	A	-	B	B	-	-	B	A	B	B	-	B	B	B	A	A	B	B	A	B	A	B	A	B	B	-	A
Ps152073	0	11.4	Ps100872	Ps000201	NA	Ps000201	0.113846	B	A	-	B	B	-	A	A	-	-	A	-	B	B	A	A	B	B	B	-	A	B	A	B	B	B	B	B	B	A	A	B	-	-	B	A	B	A	B	B	B	A
Ps125153	0	12	NA	Ps100872	NA	Ps000201	0.122823	B	A	A	-	B	-	A	-	A	B	A	-	B	B	A	A	B	-	B	B	A	B	A	B	B	B	B	B	B	A	A	B	B	A	B	-	B	A	B	B	B	A
Ps124597	0	12.6	NA	Ps100872	NA	Ps000201	0.122823	B	A	A	B	B	-	A	A	A	B	-	B	B	B	A	A	-	B	B	B	A	B	A	B	-	B	B	B	B	A	A	B	B	A	B	-	-	A	B	B	B	A
Ps140483	0	11.7	NA	Ps100872	NA	Ps000201	0.159854	B	A	A	B	B	-	A	A	A	B	A	B	B	B	-	A	B	-	B	B	A	B	-	-	B	-	B	B	B	A	A	B	B	A	B	A	B	A	B	B	B	A
Ps159082	0	10.8	NA	Ps100872	NA	Ps000201	0.194366	B	A	A	B	-	B	-	A	A	B	A	-	B	B	A	A	B	B	B	B	A	B	A	-	B	-	B	B	B	A	A	B	B	-	B	-	B	A	-	B	B	A
Ps135110	0	12	NA	Ps100872	NA	Ps000201	0.122823	-	A	A	B	-	B	A	A	A	B	A	B	B	B	A	-	B	B	B	B	A	B	-	B	B	B	-	B	B	A	A	B	B	A	-	A	B	A	B	B	B	A
Ps107777	0	12.9	NA	Ps100872	NA	Ps000201	0.0348085	B	A	A	B	B	B	A	A	A	B	-	B	B	B	A	A	B	-	B	B	A	B	A	B	B	B	B	B	B	A	A	B	B	-	B	A	B	A	B	B	B	A
Ps130065	0	12	NA	Ps100872	NA	Ps000201	0.217044	B	A	A	B	B	-	A	A	A	B	A	-	B	B	A	A	B	B	B	B	A	B	A	B	B	-	-	B	B	A	A	B	B	A	B	-	B	A	B	B	B	A
Ps157725	0	11.1	Ps100872	Ps000201	NA	Ps000201	0.0515759	B	A	A	B	B	-	A	A	A	-	-	B	-	B	A	A	-	B	B	B	A	B	A	B	B	B	B	B	B	-	A	B	-	-	B	-	B	A	B	B	B	-
Ps162897	0	10.2	Ps100872	Ps000201	NA	Ps000201	0.0455003	B	-	-	B	B	B	A	-	-	B	A	B	B	B	A	-	-	B	B	B	A	B	A	B	B	-	B	B	-	A	A	B	B	-	B	A	B	A	-	B	B	A
Ps101031	0	13.2	NA	Ps100872	NA	Ps000201	0.0768432	B	A	A	B	B	B	A	A	A	B	A	B	B	B	A	A	B	B	-	B	A	B	A	B	B	B	B	B	B	A	A	B	B	A	B	A	B	A	B	B	B	A
Ps108931	0	12.6	NA	Ps100872	NA	Ps000201	0.0704404	B	A	A	B	B	-	A	-	A	B	A	B	B	B	A	A	B	B	B	B	A	B	A	B	B	B	B	B	-	A	A	B	B	A	B	-	B	A	B	B	B	A
Ps122761	0	12.3	Ps100872	Ps000201	NA	Ps000201	0.0934478	B	-	-	B	B	B	A	A	A	B	A	B	-	B	A	A	B	-	B	B	A	B	A	B	B	B	B	B	B	A	A	B	B	A	B	A	B	A	B	B	B	A
Ps150145	0	11.4	NA	Ps100872	NA	Ps000201	0.342782	B	A	A	B	-	B	A	A	A	B	A	B	B	B	A	A	B	B	B	-	A	B	-	B	B	-	B	-	B	A	A	B	B	A	-	A	B	A	B	B	B	A
Ps129885	0	12	NA	Ps100872	NA	Ps000201	0.217044	B	A	A	B	B	B	A	A	A	B	A	-	B	B	A	-	-	B	B	-	A	B	A	B	B	B	B	B	B	A	A	B	B	A	B	A	B	A	B	-	-	A
Ps130538	0	12	Ps100872	Ps000201	NA	Ps000201	0.0307536	B	A	A	B	B	-	-	A	-	B	A	B	B	B	A	A	-	B	B	B	A	B	-	B	B	B	B	B	B	A	A	B	B	A	B	A	B	A	B	B	B	-
Ps107475	0	12.6	Ps100872	Ps000201	NA	Ps000201	0.0348085	B	A	A	B	B	B	A	A	A	B	A	B	B	B	A	A	-	B	B	B	A	B	-	B	B	B	B	B	B	A	A	B	B	-	B	A	B	-	B	B	B	A
Ps125521	0	12.3	NA	Ps100872	NA	Ps000201	0.122823	B	A	A	B	B	B	A	A	A	B	A	-	B	B	A	A	B	B	B	B	-	-	A	B	-	B	B	B	-	-	A	B	B	A	B	A	B	A	B	B	B	A
Ps109495	0	12.6	NA	Ps100872	NA	Ps000201	0.131668	B	A	A	B	B	B	A	A	-	B	A	B	B	B	A	A	B	B	B	-	A	B	A	B	B	B	B	B	B	A	A	B	B	A	B	A	B	A	B	B	B	A
Ps106093	0	12.9	NA	Ps100872	NA	Ps000201	0.179712	B	A	A	B	B	B	A	A	A	B	A	B	B	B	A	A	B	B	B	B	A	B	A	B	B	B	B	-	B	A	A	B	B	A	B	A	B	A	B	-	-	A
Ps129047	0	12	NA	Ps100872	NA	Ps000201	0.217044	B	A	A	B	B	-	A	A	A	B	A	B	-	B	A	A	B	B	B	B	A	B	-	B	B	B	B	B	B	A	A	-	B	A	-	A	B	A	B	B	-	A
Ps131940	0	12	NA	Ps100872	NA	Ps000201	0.122823	B	A	A	B	B	B	A	A	A	B	A	B	-	B	A	A	-	B	B	B	A	B	-	B	B	B	B	B	B	A	A	B	B	-	B	A	B	A	B	B	B	A
Ps100274	0	13.5	Ps100872	Ps000201	NA	Ps000201	0.108601	B	A	A	B	B	B	A	A	A	B	A	B	B	B	A	A	B	B	B	-	A	B	A	B	B	B	B	B	B	A	A	B	B	A	B	A	B	A	B	B	B	A
Ps125430	0	12.3	NA	Ps100872	NA	Ps000201	0.0640775	B	A	A	B	-	B	A	A	A	-	-	B	B	B	A	A	B	B	B	B	A	B	-	B	B	B	B	B	B	A	A	B	B	A	B	-	B	A	B	B	B	A
Ps114430	0	12.3	NA	Ps100872	NA	Ps000201	0.0934478	B	A	A	B	B	B	A	A	A	B	A	B	B	B	-	-	B	B	-	B	A	B	A	B	B	-	B	B	B	A	A	B	B	A	B	A	B	A	B	B	B	A
Ps157359	0	10.8	NA	Ps100872	NA	Ps000201	0.194366	B	A	A	B	-	B	A	-	A	-	A	-	B	B	A	A	B	-	-	B	A	B	A	B	B	B	B	B	-	-	A	B	B	A	B	-	B	A	-	B	B	A
Ps158760	0	10.8	NA	Ps100872	NA	Ps000201	0.33039	B	A	A	B	B	-	A	A	A	-	A	B	B	B	A	-	B	B	-	B	A	B	A	B	B	-	B	-	-	A	A	B	B	A	-	-	B	A	B	B	B	A
Ps147604	0	11.7	NA	Ps100872	NA	Ps000201	0.113846	B	A	A	B	B	-	-	A	A	-	-	B	-	-	A	A	-	B	B	B	A	B	A	B	B	B	B	B	B	A	-	B	B	A	B	A	B	A	B	B	B	A
Ps102469	0	13.2	Ps100872	Ps000201	NA	Ps000201	0.0768432	B	A	A	B	B	B	A	A	A	B	A	B	-	B	A	A	B	B	B	B	A	B	A	B	B	B	B	B	B	A	A	B	B	A	B	A	B	-	B	B	B	A
Ps161290	0	10.8	NA	Ps100872	NA	Ps000201	0.070546	-	A	A	-	B	B	-	A	A	B	-	-	-	-	A	-	B	B	B	B	-	B	A	B	B	B	B	B	B	A	A	B	B	A	-	-	B	A	B	B	B	A
Ps149707	0	11.7	NA	Ps100872	NA	Ps000201	0.0577796	B	-	A	B	B	B	A	-	A	B	-	B	-	B	A	A	B	B	B	-	-	B	A	B	B	B	B	B	B	A	A	B	B	A	-	A	B	A	B	B	-	A
Ps142637	0	11.7	NA	Ps100872	NA	Ps000201	0.0858128	-	A	A	B	B	B	A	-	A	B	A	B	B	B	A	A	B	-	B	B	-	-	A	B	B	B	-	B	B	-	A	B	B	A	B	A	B	A	B	B	B	A
Ps108242	0	12.9	NA	Ps100872	NA	Ps000201	0.2278	B	A	A	B	B	-	A	A	A	B	A	B	B	B	A	A	B	B	B	B	A	B	A	-	-	B	B	B	-	A	A	B	B	A	B	A	B	A	B	B	B	A
Ps137466	0	11.7	NA	Ps100872	NA	Ps000201	0.0423302	B	A	A	B	B	-	-	A	A	B	A	-	B	B	A	A	B	B	B	B	-	B	A	B	B	B	B	B	B	A	-	B	B	-	B	A	-	A	B	B	B	A
Ps122990	0	12.6	NA	Ps100872	NA	Ps000201	0.0934478	B	A	A	B	B	-	A	A	-	B	-	B	B	B	A	A	B	B	B	B	A	B	A	B	B	B	B	-	B	A	A	B	B	A	B	A	B	A	-	B	B	A
Ps148324	0	11.4	NA	Ps100872	NA	Ps000201	0.113846	-	A	A	B	B	-	A	-	A	B	A	B	B	-	-	A	B	B	B	B	A	-	A	B	B	B	B	B	B	A	A	B	B	A	B	A	-	A	B	B	B	A
Ps107367	0	12.6	NA	Ps100872	NA	Ps000201	0.2278	B	A	A	B	B	B	A	A	A	B	A	B	B	B	A	A	-	B	B	B	A	B	A	B	B	B	B	B	B	A	A	B	-	A	B	A	B	A	-	B	B	A
Ps138670	0	11.7	NA	Ps100872	NA	Ps000201	0.0423302	B	A	A	B	B	B	A	A	A	B	A	B	-	B	-	A	-	B	B	B	A	B	A	B	B	B	B	B	B	-	A	B	B	-	B	A	B	A	B	B	-	A
Ps162071	0	10.5	NA	Ps100872	NA	Ps000201	0.138982	B	-	A	B	B	-	A	A	A	B	A	B	-	B	-	A	B	B	B	B	A	B	-	B	B	-	B	B	B	A	A	B	-	A	-	A	-	A	B	-	B	A
Ps137543	0	11.7	NA	Ps100872	NA	Ps000201	0.0858128	B	A	A	-	B	B	A	A	A	B	A	B	B	B	A	A	B	B	B	B	A	B	-	-	B	B	B	-	-	A	-	B	B	A	B	-	B	A	B	B	B	A
Ps144250	0	12	NA	Ps100872	NA	Ps000201	0.43488	B	A	A	B	B	-	A	A	A	B	A	B	-	B	A	A	-	B	B	B	A	B	A	B	-	B	B	B	B	A	A	-	B	A	B	A	B	A	-	B	B	A
Ps161562	0	10.8	NA	Ps100872	NA	Ps000201	0.138982	B	-	A	B	B	B	A	A	A	B	-	B	B	B	A	A	-	B	B	B	-	B	A	B	B	B	B	-	B	A	A	B	B	A	-	-	-	A	-	B	B	A
Ps135902	0	11.7	Ps100872	Ps000201	NA	Ps000201	0.159854	B	A	-	B	B	B	A	A	A	B	A	B	B	B	A	A	-	-	B	B	A	B	A	B	B	B	B	-	B	A	A	B	B	A	B	A	B	-	-	B	-	A
Ps109180	0	12.6	Ps100872	Ps000201	NA	Ps000201	0.131668	B	A	A	B	-	B	A	A	A	B	A	B	B	B	A	A	B	B	B	B	A	B	A	B	B	B	B	B	-	A	A	B	B	A	B	A	B	A	-	B	B	-
Ps122799	0	12.6	Ps100872	Ps000201	NA	Ps000201	0.0934478	B	A	A	-	B	B	A	A	A	B	A	B	B	B	A	A	B	B	B	B	A	B	A	B	-	B	B	B	B	A	A	B	B	A	-	A	B	-	B	B	B	A
Ps123618	0	12.3	Ps100872	Ps000201	NA	Ps000201	0.0934478	B	A	A	B	B	B	A	A	A	B	A	B	-	B	A	A	-	B	B	B	-	B	A	B	B	B	B	B	B	A	A	B	B	A	B	A	B	A	B	B	B	-
Ps125388	0	12	NA	Ps100872	NA	Ps000201	0.122823	B	A	A	-	B	B	A	A	A	B	A	B	B	B	A	A	B	B	B	B	A	-	A	B	B	B	B	B	B	-	A	B	B	A	B	A	B	A	B	B	-	A
Ps136277	0	11.7	NA	Ps100872	NA	Ps000201	0.274299	B	A	A	B	B	-	A	A	A	B	A	B	-	B	A	A	B	B	-	B	A	B	A	B	B	-	B	B	-	A	A	B	B	A	B	-	B	A	B	B	B	A
Ps147884	0	11.7	NA	Ps100872	NA	Ps000201	0.0577796	B	A	A	B	B	-	-	A	A	B	-	B	B	B	-	A	B	B	B	B	A	B	A	B	B	-	B	B	B	A	A	B	B	-	B	A	B	A	B	B	B	A
Ps116253	0	12.3	Ps100872	Ps000201	NA	Ps000201	0.0934478	B	A	-	B	B	B	A	A	A	B	A	B	B	-	A	A	B	B	B	B	A	B	-	B	B	B	B	B	B	A	A	B	B	A	B	A	-	A	-	B	B	A
Ps120665	0	12.3	Ps100872	Ps000201	NA	Ps000201	0.0934478	B	A	-	B	B	-	A	A	A	B	A	B	B	B	A	A	B	B	B	B	-	-	A	B	B	B	B	B	B	A	A	B	-	A	B	A	B	A	B	B	B	A
Ps152256	0	11.1	Ps100872	Ps000201	NA	Ps000201	0.262332	B	A	-	B	B	-	-	A	A	B	A	-	B	B	A	A	-	B	B	B	A	B	A	B	B	-	B	B	-	A	A	B	B	A	B	A	B	A	B	B	B	A
Ps163766	0	9.9	Ps100872	Ps000201	NA	Ps000201	0.170067	-	A	A	B	B	B	-	A	A	B	-	-	-	B	-	A	B	B	-	B	A	B	A	B	B	B	B	-	B	A	A	-	B	A	B	A	B	A	B	-	-	-
Ps136197	0	12	NA	Ps100872	NA	Ps000201	0.159854	B	A	A	B	B	B	A	A	A	B	A	-	B	B	A	A	B	B	-	-	A	B	-	B	-	B	B	B	B	A	-	B	B	A	B	A	B	A	-	B	B	A
Ps135780	0	12	NA	Ps100872	NA	Ps000201	0.159854	B	A	A	B	B	B	A	-	A	B	-	B	B	B	A	A	-	B	B	B	A	B	A	B	B	B	B	B	B	A	A	B	-	A	-	A	B	A	B	B	-	A
Ps142813	0	11.7	Ps100872	Ps000201	NA	Ps000201	0.274299	B	A	A	-	B	-	A	A	A	B	A	B	B	-	A	A	-	B	B	B	A	B	A	B	B	B	-	B	B	A	A	B	-	A	B	A	B	-	B	B	B	A
Ps122869	0	12.3	NA	Ps100872	NA	Ps000201	0.169912	B	A	A	B	B	-	A	A	A	B	A	B	B	B	A	A	B	B	B	B	-	B	A	-	B	B	B	B	B	A	A	-	B	A	B	A	B	A	B	-	B	A
Ps117913	0	12.3	Ps100872	Ps000201	NA	Ps000201	0.0934478	B	A	-	B	B	-	A	A	A	B	A	B	B	B	A	A	B	B	B	B	A	-	A	B	B	B	B	B	B	A	A	B	B	A	B	A	B	A	B	B	-	-
Ps000023	0.9	17.9	Ps100872	Ps000201	NA	Ps000201	0.0579277	B	A	A	B	B	B	A	A	A	B	A	B	-	B	A	A	B	B	B	B	A	B	A	B	B	B	B	B	B	A	A	B	B	A	B	A	B	A	B	B	B	B
Ps150008	1.1	9.7	Ps100872	Ps000201	NA	Ps000201	0.205903	B	A	A	B	B	-	A	A	A	B	-	-	B	B	A	A	B	B	B	B	A	B	A	B	B	B	B	B	-	A	A	B	B	A	B	A	B	A	B	B	-	B
Ps119154	1.1	10.6	Ps100872	Ps000201	NA	Ps000201	0.0934478	B	-	A	B	B	B	A	A	A	B	A	B	B	B	A	A	B	B	B	-	A	B	A	B	-	-	B	B	B	A	A	B	B	A	B	A	B	A	B	B	B	B
Ps106812	1.2	10.9	Ps100872	Ps000201	NA	Ps000201	0.0526323	B	A	A	B	B	-	A	A	A	B	A	-	B	B	A	A	B	B	B	B	-	B	A	B	B	B	B	B	B	A	A	B	B	A	B	A	B	A	B	B	B	B
Ps108286	1.2	10.6	Ps100872	Ps000201	NA	Ps000201	0.0704404	B	A	A	-	B	B	A	A	A	B	A	B	B	B	A	A	B	B	B	B	A	B	A	B	B	B	B	B	B	-	A	B	B	A	B	A	B	A	-	B	B	B
Ps145469	1.2	9.4	Ps100872	Ps000201	NA	Ps000201	0.113846	B	A	A	B	-	B	-	-	A	B	A	B	B	B	A	A	B	B	B	B	A	B	A	B	B	-	B	B	B	A	A	-	B	A	B	A	-	A	B	-	-	B
Ps100456	1.2	11.5	Ps100872	Ps000201	NA	Ps000201	0.0579277	B	A	A	B	B	B	A	A	A	B	A	B	-	B	A	A	B	B	B	B	A	B	A	B	B	B	B	B	B	A	A	B	B	A	B	A	B	A	B	B	B	B
Ps148556	1.2	9.4	Ps100872	Ps000201	NA	Ps000201	0.205903	B	-	A	-	B	-	A	A	A	B	A	B	B	-	A	A	B	B	B	B	A	-	A	B	B	B	B	-	B	A	A	-	B	A	B	A	B	A	B	B	B	B
Ps139600	1.2	9.7	Ps100872	Ps000201	NA	Ps000201	0.0191496	B	A	A	B	B	B	A	A	A	B	A	B	-	B	A	-	B	B	B	B	A	B	A	B	B	B	B	B	B	A	A	-	-	-	B	A	B	A	B	B	B	B
Ps144758	1.2	9.4	Ps100872	Ps000201	NA	Ps000201	0.113846	B	A	A	B	B	-	A	A	-	B	A	B	-	B	A	A	B	B	B	B	A	B	A	-	B	B	B	B	B	A	A	B	B	-	B	A	-	A	-	B	B	B
Ps114584	1.2	10.3	Ps100872	Ps000201	NA	Ps000201	0.169912	B	A	A	B	B	-	A	A	A	B	A	B	B	B	A	A	B	B	B	B	A	B	A	-	B	B	-	B	B	A	A	B	-	A	B	A	B	A	B	B	B	B
Ps162116	1.2	8.6	Ps100872	Ps000201	NA	Ps000201	0.0325828	B	A	A	-	B	B	A	A	A	B	A	B	-	-	A	A	B	B	B	B	-	B	-	B	B	B	B	B	B	-	A	B	B	-	-	-	B	A	B	B	-	B
Ps152144	1.2	9.4	Ps100872	Ps000201	NA	Ps000201	0.0781691	B	A	A	B	B	-	A	A	A	B	-	-	B	B	A	A	B	-	B	-	A	B	A	B	B	-	B	B	-	-	A	B	B	A	B	-	B	A	B	B	B	B
Ps140538	1.2	9.7	Ps100872	Ps000201	NA	Ps000201	0.159854	B	A	A	B	B	B	A	A	A	-	A	-	B	B	A	A	B	-	B	B	A	B	-	-	B	B	B	B	B	A	A	B	B	A	B	A	B	A	-	B	B	B
Ps115615	1.2	10.3	Ps100872	Ps000201	NA	Ps000201	0.0474254	B	A	A	B	B	B	A	A	A	B	A	B	-	B	A	A	B	B	B	B	-	B	A	B	B	B	B	B	B	-	A	B	B	A	B	A	-	A	B	-	B	B
Ps146193	1.2	9.4	Ps100872	Ps000201	NA	Ps000201	0.0577796	B	-	A	B	B	B	A	A	A	B	A	B	B	B	A	-	B	B	B	B	A	B	A	-	B	B	B	-	B	-	A	B	-	A	B	A	B	A	-	B	-	B
Ps101103	1.2	11.2	Ps100872	Ps000201	NA	Ps000201	0.0183207	B	A	A	B	B	B	A	A	A	B	A	B	B	B	-	A	B	B	B	B	A	B	A	B	B	B	B	B	B	A	A	B	B	-	B	A	B	A	B	B	B	B
Ps133873	1.2	10	Ps100872	Ps000201	NA	Ps000201	0.122823	-	A	A	B	B	B	A	A	A	B	A	B	B	B	A	A	-	B	B	B	-	B	A	B	B	B	-	B	B	A	A	-	B	A	B	A	B	A	B	B	B	B
Ps124607	1.2	10	Ps100872	Ps000201	NA	Ps000201	0.122823	B	A	A	B	B	B	A	A	A	-	A	B	B	-	A	A	-	B	B	-	-	B	A	B	B	B	B	B	B	A	A	B	B	A	B	A	B	A	B	B	B	B
Ps112150	1.2	10.6	Ps100872	Ps000201	NA	Ps000201	0.0348085	B	A	A	B	B	B	A	A	-	B	A	-	B	B	-	A	B	B	B	B	A	B	A	B	B	B	B	B	B	A	A	B	B	A	B	A	B	A	B	-	B	B
Ps124450	1.2	10	Ps100872	Ps000201	NA	Ps000201	0.217044	B	A	A	-	B	B	A	A	A	-	A	B	-	B	A	A	B	B	B	B	A	-	A	-	B	B	B	B	B	A	A	B	B	A	B	A	B	A	-	B	B	B
Ps106196	1.2	10.9	Ps100872	Ps000201	NA	Ps000201	0.0526323	B	A	A	B	B	B	A	A	A	B	A	B	B	B	A	A	B	B	B	B	-	B	A	-	B	B	B	B	-	A	A	B	B	A	B	A	B	A	B	B	B	B
Ps136928	1.2	10	Ps100872	Ps000201	NA	Ps000201	0.0423302	B	-	A	B	B	B	A	A	A	B	-	-	B	B	A	A	B	B	B	B	-	B	A	B	B	B	B	B	B	A	A	-	-	A	B	A	B	A	B	-	B	B
Ps115648	1.2	10.3	Ps100872	Ps000201	NA	Ps000201	0.0474254	B	A	A	B	B	-	A	-	A	B	A	B	B	B	A	A	B	B	B	B	A	B	A	B	B	-	B	B	B	A	A	B	B	A	B	-	B	A	B	B	-	B
Ps111169	1.2	10.6	Ps100872	Ps000201	NA	Ps000201	0.0704404	B	-	A	B	B	-	A	A	A	B	A	B	B	B	A	A	B	B	B	B	A	B	A	B	B	B	B	-	B	A	A	B	B	A	B	A	B	A	B	-	B	B
Ps125561	1.2	10	Ps100872	Ps000201	NA	Ps000201	0.122823	B	A	A	B	B	-	A	A	A	B	A	B	B	B	A	A	B	B	B	B	A	B	A	-	B	B	-	-	B	-	A	B	B	A	B	A	B	A	B	B	-	B
Ps123036	1.2	10.6	Ps100872	Ps000201	NA	Ps000201	0.0934478	B	A	A	B	B	-	A	A	A	B	A	B	-	B	A	A	B	B	B	B	A	B	-	B	-	B	B	B	-	A	A	B	B	A	B	A	B	A	B	B	B	B
Ps116830	1.2	10.3	Ps100872	Ps000201	NA	Ps000201	0.0934478	B	A	A	B	B	B	A	A	A	B	A	B	B	B	A	-	-	B	B	B	A	B	A	B	B	B	-	-	B	A	A	B	B	A	B	A	B	A	B	B	-	B
Ps156307	1.2	9.4	Ps100872	Ps000201	NA	Ps000201	0.149541	B	A	A	B	-	B	A	A	A	-	-	B	-	B	A	A	B	B	B	B	A	B	-	-	B	B	B	B	B	A	A	-	B	A	B	A	-	A	B	B	B	B
Ps106703	1.2	10.9	Ps100872	Ps000201	NA	Ps000201	0.0526323	B	A	A	B	B	B	A	A	A	B	A	B	-	B	A	A	B	B	B	B	A	B	-	B	B	B	B	B	-	A	A	B	B	A	B	A	B	A	B	B	B	B
Ps103650	1.2	10.9	Ps100872	Ps000201	NA	Ps000201	0.0526323	B	A	A	B	B	B	A	A	A	B	A	B	B	-	A	A	B	B	B	B	A	B	A	B	B	B	B	B	-	A	A	B	B	A	B	A	B	A	B	B	B	B
Ps122559	1.2	10.3	Ps100872	Ps000201	NA	Ps000201	0.0934478	B	A	A	B	B	B	A	A	A	B	A	B	-	B	A	A	B	-	B	B	A	B	A	B	B	-	B	B	B	A	A	B	B	A	B	A	B	A	B	-	B	B
Ps100861	1.2	11.2	Ps100872	Ps000201	NA	Ps000201	0.0768432	B	A	A	B	B	B	A	A	A	B	A	B	B	B	A	A	B	B	B	B	A	B	A	B	B	B	B	B	B	A	A	B	B	A	B	A	-	A	B	B	-	B
Ps120279	1.2	10.6	Ps100872	Ps000201	NA	Ps000201	0.0934478	B	A	A	B	B	-	A	A	A	-	A	B	-	B	A	A	B	B	B	B	A	B	A	B	-	B	B	B	B	A	A	B	B	A	B	-	B	A	B	B	B	B
Ps107992	1.2	10.9	Ps100872	Ps000201	NA	Ps000201	0.0348085	B	A	A	B	B	B	-	A	A	B	A	B	-	B	A	-	B	B	B	B	A	B	A	B	-	B	B	B	B	A	A	B	B	A	B	A	B	A	B	B	B	B
Ps160560	1.2	8.6	Ps100872	Ps000201	NA	Ps000201	0.621873	B	A	A	B	B	B	A	A	A	-	A	-	B	B	A	A	B	B	-	-	A	B	A	B	B	B	-	B	B	A	A	B	-	A	-	A	-	A	B	-	-	B
Ps152219	1.8	9.4	Ps100872	Ps000201	NA	Ps000201	0.00648531	B	A	B	B	B	B	A	A	-	-	A	B	B	B	-	A	B	B	B	B	A	B	-	B	B	B	B	B	B	A	A	B	B	A	-	A	B	A	B	B	B	-
Ps159374	1.8	9.1	Ps100872	Ps000201	NA	Ps000201	0.0515759	B	A	A	B	B	-	A	A	A	B	A	-	B	-	A	A	B	B	B	B	-	B	A	B	B	B	B	B	B	-	A	B	B	-	B	A	-	-	B	B	-	B
Ps128407	1.8	10.3	Ps100872	Ps000201	NA	Ps000201	0.122823	B	A	-	B	B	B	A	A	A	-	A	B	B	-	A	A	-	B	B	B	A	B	A	B	B	B	B	B	-	A	A	B	B	A	B	A	B	A	B	B	-	B
eSSR182-305	1.9	35.7	Ps100872	Ps000201	Ps100872	Ps000201	0.0474254	-	A	B	B	B	B	A	A	A	B	A	-	-	B	A	A	B	B	B	B	A	B	A	B	B	B	-	B	B	A	A	B	B	A	B	A	B	B	B	B	B	-
Ps103435	1.9	9.7	Ps100872	Ps000201	NA	Ps000201	0.10105	B	A	-	B	B	B	A	A	A	B	A	B	B	B	A	A	B	B	B	B	A	B	A	B	B	B	B	B	B	A	A	B	B	A	B	A	B	A	B	B	B	B
Ps138602	2.2	8.6	Ps100872	Ps000201	NA	Ps000201	0.0191496	B	A	B	B	B	B	A	-	A	B	A	B	B	-	A	A	B	B	B	B	A	B	A	B	-	B	B	B	B	-	A	B	B	A	B	-	B	A	-	B	B	B
Ps142015	2.4	10	Ps100872	Ps000201	Ps100872	Ps000201	0.0858128	B	A	B	B	-	-	A	-	A	-	A	B	B	B	A	A	-	B	B	B	A	B	A	B	B	B	B	B	-	A	A	B	B	A	B	A	B	A	-	B	B	B
Ps139228	2.4	10	Ps100872	Ps000201	Ps100872	Ps000201	0.0191496	B	A	B	B	B	B	-	A	A	B	A	-	B	B	A	A	B	B	B	B	-	B	A	B	-	B	B	B	B	A	A	B	B	A	B	A	B	A	B	-	-	B
Ps121780	2.4	10.6	Ps100872	Ps000201	Ps100872	Ps000201	0.00952879	B	A	B	B	B	B	A	A	-	B	A	-	B	B	A	A	B	B	B	B	-	B	A	B	-	B	B	B	B	A	A	B	B	A	B	A	B	A	B	B	B	B
Ps107629	2.4	10.9	Ps100872	Ps000201	Ps100872	Ps000201	0.00665561	B	A	B	B	B	B	A	A	-	B	-	B	B	B	A	-	B	B	B	B	A	B	A	B	B	B	-	B	B	A	A	B	B	A	B	A	B	A	B	B	B	B
Ps158354	2.4	9.1	Ps100872	Ps000201	Ps100872	Ps000201	0.104757	B	A	B	B	B	-	-	A	A	B	A	B	B	B	A	A	B	-	B	-	-	-	A	B	-	-	B	B	B	A	A	B	-	A	B	A	B	A	B	B	-	B
Ps156165	2.4	9.4	Ps100872	Ps000201	Ps100872	Ps000201	0.149541	B	-	B	B	B	B	A	A	A	B	A	B	B	B	A	A	-	-	-	-	A	B	A	B	B	-	B	-	B	A	A	-	B	A	B	A	B	A	B	B	B	B
Ps108072	2.4	10.9	Ps100872	Ps000201	Ps100872	Ps000201	0.0158613	B	A	B	-	B	-	A	A	A	B	A	B	B	B	A	A	B	B	B	B	A	B	A	B	B	B	B	B	B	A	A	B	B	-	B	-	B	A	B	B	B	B
Ps109552	2.4	10.9	Ps100872	Ps000201	Ps100872	Ps000201	0.0348085	B	A	B	B	B	-	A	A	A	-	A	B	B	B	A	-	B	B	B	B	A	B	A	B	B	B	B	B	B	A	A	B	B	A	B	A	B	A	-	B	B	B
Ps162494	2.4	8.6	Ps100872	Ps000201	Ps100872	Ps000201	0.182422	-	A	B	B	B	B	A	A	A	B	A	-	B	B	A	-	-	B	-	-	A	B	A	B	-	-	B	-	B	A	A	B	B	A	B	-	-	A	B	B	-	B
Ps120017	2.4	10.6	Ps100872	Ps000201	Ps100872	Ps000201	0.0474254	B	A	B	-	B	-	A	A	A	B	A	B	B	B	A	A	B	B	-	B	A	B	A	B	-	B	B	B	B	A	A	B	B	A	B	A	B	A	B	B	B	B
Ps100732	2.5	11.5	Ps100872	Ps000201	Ps100872	Ps000201	0.0183207	B	-	B	B	B	B	A	A	A	B	A	B	B	B	A	A	B	B	B	B	A	B	A	B	-	B	B	B	B	A	A	B	B	A	B	A	B	A	B	B	B	B
Ps101835	2.5	11.5	Ps100872	Ps000201	Ps100872	Ps000201	0.039	B	A	B	B	B	B	A	A	A	B	A	B	B	B	A	A	B	-	B	-	A	B	A	B	B	B	B	B	B	A	A	B	B	A	B	A	B	A	B	B	B	B
Ps144810	2.5	9.7	Ps100872	Ps000201	Ps100872	Ps000201	0.113846	B	A	B	B	B	B	A	A	A	-	A	-	B	B	A	A	B	B	B	B	A	B	A	-	B	B	B	-	B	A	A	B	-	A	B	-	B	A	B	-	B	B
Ps159102	2.7	9.1	Ps100872	Ps000201	NA	Ps000228	0.0515759	B	A	-	-	-	A	A	A	-	-	A	B	B	B	A	A	B	B	B	B	A	B	A	B	-	B	B	B	B	A	A	B	B	-	-	A	B	B	B	B	-	B
Ps154650	2.7	9.4	Ps100872	Ps000201	NA	Ps000228	0.037373	B	A	-	B	-	A	A	A	A	B	A	B	B	B	A	A	B	-	B	B	A	B	A	B	B	-	B	B	B	A	-	B	B	-	B	A	B	B	B	-	-	B
Ps127870	2.7	10.3	Ps100872	Ps000201	NA	Ps000228	0.0307536	B	A	B	B	B	-	A	-	A	B	A	B	B	B	A	A	B	B	B	B	A	B	A	B	B	-	B	B	B	A	A	B	B	-	B	A	B	-	B	B	B	B
Ps136186	2.7	10	Ps100872	Ps000201	NA	Ps000228	0.0191496	B	A	B	B	B	A	A	-	-	-	A	B	B	B	A	A	B	B	B	B	A	B	A	B	-	B	B	-	B	A	-	B	B	A	B	A	B	B	B	B	B	-
Ps101078	2.8	11.5	Ps100872	Ps000201	NA	Ps000228	0.0183207	B	A	B	B	B	B	A	A	A	B	A	B	B	B	A	A	B	B	B	B	-	B	A	B	B	B	B	B	B	A	A	B	B	A	B	A	B	-	B	B	B	B
Ps135809	2.8	10	Ps100872	Ps000201	NA	Ps000228	0.0191496	B	A	B	B	B	B	-	A	A	-	A	-	B	B	A	A	B	B	B	B	A	B	A	B	B	B	B	B	B	A	A	B	B	-	B	A	B	-	B	B	-	B
Ps118902	2.8	10.6	Ps100872	Ps000201	NA	Ps000228	0.0221679	-	A	-	B	B	A	A	-	A	B	-	B	B	B	A	A	B	-	B	B	A	B	A	B	B	B	B	B	B	A	A	B	B	A	B	A	B	B	B	B	B	B
Ps145862	2.8	10	Ps100872	Ps000201	NA	Ps000228	0.205903	B	A	-	B	B	A	A	A	A	-	A	-	-	B	A	A	B	B	B	B	A	B	A	-	B	B	-	B	B	A	A	B	B	A	B	A	B	B	B	-	B	B
Ps121979	2.8	10.6	Ps100872	Ps000201	NA	Ps000228	0.0474254	B	A	B	B	B	A	A	A	A	B	A	B	B	B	A	-	B	B	-	B	A	-	A	-	B	B	B	B	B	A	A	B	B	A	B	A	B	-	B	B	B	B
Ps146922	2.8	9.7	Ps100872	Ps000201	NA	Ps000228	0.0268567	B	A	-	B	B	A	A	A	A	-	A	B	B	B	A	A	B	B	-	B	A	B	-	B	B	B	-	B	-	-	A	B	B	A	B	-	B	B	B	B	B	B
Ps100083	2.9	12	Ps100872	Ps000201	Ps100872	Ps000228	0.0209213	B	A	B	B	B	B	A	A	A	B	A	B	B	B	A	A	B	B	B	B	A	B	A	B	B	B	B	B	B	A	A	B	B	A	B	A	B	B	B	B	B	B
Ps106996	2.9	10.9	Ps100872	Ps000201	Ps100872	Ps000228	0.0158613	B	A	B	B	B	B	A	A	A	-	-	B	B	B	A	A	B	B	B	B	A	B	A	B	B	B	B	B	B	A	A	B	B	-	B	A	B	B	B	B	B	B
Ps106574	2.9	11.2	Ps100872	Ps000201	Ps100872	Ps000228	0.0253473	B	A	B	B	B	-	A	A	A	B	A	B	B	B	A	A	B	B	B	B	A	B	-	B	B	B	B	B	B	A	A	B	B	A	B	A	B	B	B	-	B	B
Ps153991	3	9.7	Ps100872	Ps000201	NA	Ps000228	0.0781691	B	A	B	B	B	B	A	A	A	B	A	B	-	B	-	A	-	-	B	B	A	B	A	B	B	B	B	B	B	A	A	-	B	-	B	A	-	B	-	B	B	B
Ps136673	3	10	Ps100872	Ps000201	Ps100872	Ps000228	0.00793192	B	-	B	B	B	B	-	A	A	B	A	-	B	-	A	A	B	B	B	B	A	B	A	B	B	B	B	B	A	A	A	B	B	-	B	A	B	B	-	B	B	B
Ps153012	3	9.4	Ps100872	Ps000201	NA	Ps000228	0.0163092	B	A	B	B	B	A	A	A	A	B	A	B	B	B	A	-	B	-	-	B	A	B	-	B	B	B	B	B	-	A	A	B	-	A	B	-	B	B	B	B	-	B
Ps100458	3	11.8	Ps100872	Ps000201	Ps100872	Ps000228	0.0286714	B	A	B	B	B	A	A	A	A	B	A	B	B	B	A	A	B	B	B	B	A	B	A	B	B	B	B	B	B	A	A	B	B	A	B	A	B	B	B	B	B	B
Ps106275	3	11.5	Ps100872	Ps000201	Ps100872	Ps000228	0.0253473	B	A	B	B	B	B	A	A	A	B	-	B	-	B	A	A	B	B	B	B	A	B	A	B	B	B	-	B	B	A	A	B	B	A	B	A	B	B	B	B	B	B
Ps162975	3	8.9	Ps100872	Ps000201	NA	Ps000228	0.0455003	B	A	B	B	B	-	A	A	A	-	-	B	-	B	-	-	B	B	B	B	A	B	A	-	B	B	B	B	B	A	A	-	-	-	B	A	B	B	-	-	B	B
Ps110325	3	11.2	Ps100872	Ps000201	Ps100872	Ps000228	0.0704404	B	A	B	B	B	A	A	A	A	-	A	B	-	B	A	A	B	B	B	B	A	B	A	B	B	B	B	B	B	A	A	B	B	A	B	A	-	B	B	B	-	B
Ps135839	3	10	Ps100872	Ps000201	Ps100872	Ps000228	0.0423302	B	A	B	B	B	B	A	A	A	-	A	B	B	-	A	A	B	-	B	B	A	B	A	B	B	B	B	B	-	-	A	B	B	A	B	A	B	B	B	B	B	B
Ps101969	3	11.8	Ps100872	Ps000201	Ps100872	Ps000228	0.039	B	A	B	B	B	-	A	A	A	B	A	B	-	B	A	A	B	B	B	B	A	B	A	B	B	B	B	B	B	A	A	B	B	A	B	A	B	B	B	B	B	B
Ps115078	3	10.6	Ps100872	Ps000201	Ps100872	Ps000228	0.0221679	B	A	B	B	-	A	A	A	A	B	A	B	B	B	A	A	B	B	B	B	A	B	-	B	-	B	B	B	-	-	A	B	B	A	B	A	B	B	B	B	B	B
Ps113886	3	10.9	Ps100872	Ps000201	Ps100872	Ps000228	0.0348085	B	A	B	B	B	B	A	A	-	B	A	B	B	B	A	A	B	B	B	B	A	-	A	B	B	B	B	B	B	A	A	-	B	A	B	A	B	B	B	B	B	B
Ps000201	3.6						0.0131491	B	A	B	B	B	B	A	A	A	B	A	B	-	B	A	A	B	B	B	B	A	B	A	B	B	B	B	B	B	A	A	B	B	A	B	A	B	B	B	B	B	B
Ps001058	3.6	25.9	Ps100872	Ps000201	Ps100872	Ps000228	0.00795544	B	A	B	B	B	B	A	A	A	B	A	B	-	B	A	A	B	B	B	B	-	B	A	B	B	B	B	B	B	A	A	B	B	A	B	A	B	B	B	B	B	B
Ps000316	3.6	26.2	Ps100872	Ps000201	Ps100872	Ps000228	0.0131491	B	A	B	B	B	B	A	A	A	B	A	B	-	B	A	A	B	B	B	B	A	B	A	B	B	B	B	B	B	A	A	B	B	A	B	A	B	B	B	B	B	B
Ps114394	3.6	12.6	Ps100872	Ps000201	Ps100872	Ps000228	0.00952879	B	A	B	B	B	B	A	A	A	B	A	-	B	B	A	A	B	B	B	B	A	B	A	B	B	B	B	-	B	-	A	B	B	A	B	-	B	B	B	B	B	-
Ps145337	3.6	11.7	Ps100872	Ps000201	Ps100872	Ps000228	0.011412	B	A	B	B	B	B	A	A	A	B	-	-	B	B	A	A	B	-	B	B	A	B	A	B	B	B	B	-	B	A	-	B	B	-	B	A	B	B	B	B	-	-
Ps155965	3.6	11.7	Ps000201	Ps000228	Ps100872	Ps000228	0.0163092	B	A	B	B	B	B	A	A	A	B	A	-	-	-	A	A	B	B	B	-	A	-	-	B	B	B	-	B	B	-	-	B	B	A	B	A	B	B	B	B	B	B
Ps161598	3.6	11.1	Ps100872	Ps000201	Ps100872	Ps000228	0.0136637	B	-	B	B	B	-	A	A	-	B	A	B	-	B	A	A	-	B	B	B	A	-	-	B	-	B	B	-	B	A	A	B	B	A	B	-	B	B	B	B	B	B
Ps156329	3.6	11.4	Ps100872	Ps000201	Ps100872	Ps000228	0.0163092	-	-	B	B	B	-	A	A	-	B	-	B	B	B	A	A	B	B	B	B	A	B	A	B	B	B	B	-	B	A	A	B	-	A	B	A	B	-	B	-	B	B
Ps157030	3.6	11.7	Ps100872	Ps000201	Ps100872	Ps000228	0.0781691	B	A	B	B	B	B	A	A	A	B	A	B	-	B	A	A	B	B	-	B	A	B	A	-	-	B	B	B	-	A	A	B	-	-	B	A	B	B	B	B	-	B
Ps115624	3.6	12.6	Ps000201	Ps000228	Ps100872	Ps000228	0.0221679	-	A	B	-	B	B	A	A	-	B	A	B	B	B	A	A	B	B	B	B	A	B	A	B	B	B	B	B	B	A	A	B	B	A	B	A	B	-	B	-	B	B
Ps140948	3.6	12.3	Ps000201	Ps000228	Ps100872	Ps000228	0.0191496	-	A	B	B	B	B	A	A	A	B	A	B	-	B	A	-	B	B	B	-	A	B	A	-	B	B	B	B	-	-	A	B	B	A	B	A	B	B	B	B	B	B
Ps109417	3.6	12.9	Ps100872	Ps000201	Ps100872	Ps000228	0.0158613	B	A	B	B	B	-	A	A	A	B	A	B	B	B	A	A	B	B	B	B	A	-	-	B	B	B	B	B	B	A	A	B	B	A	B	A	-	B	B	B	B	B
Ps142046	3.6	12.3	Ps100872	Ps000201	Ps100872	Ps000228	0.0858128	-	A	-	B	B	B	A	A	A	B	A	B	-	B	A	A	B	B	B	B	A	B	A	-	B	B	-	B	B	A	A	B	B	A	B	A	-	B	B	-	B	B
Ps117628	3.6	12.6	Ps100872	Ps000201	Ps100872	Ps000228	0.00376182	B	A	B	B	B	B	A	-	-	-	A	B	B	B	A	-	B	B	B	B	A	B	A	B	B	B	B	B	B	A	A	B	-	A	B	A	B	B	B	B	B	B
Ps140864	3.6	12.3	Ps000201	Ps000228	Ps100872	Ps000228	0.0423302	B	A	B	B	B	-	-	A	A	-	A	B	-	-	A	A	-	B	B	-	A	B	A	B	B	B	B	B	B	A	A	B	B	A	B	A	B	B	B	B	B	B
Ps129860	3.6	12.6	Ps100872	Ps000201	Ps100872	Ps000228	0.0307536	B	A	B	B	B	B	A	A	A	B	A	B	-	B	A	A	B	B	B	B	A	B	A	-	B	B	B	B	B	A	A	B	B	A	B	A	B	B	B	B	B	-
Ps140142	3.6	12	Ps100872	Ps000201	Ps100872	Ps000228	0.00793192	B	A	B	B	B	-	A	-	A	B	A	B	B	B	A	A	B	B	B	B	A	B	A	B	B	B	B	B	B	A	A	-	B	-	B	A	B	B	B	B	-	B
Ps130488	3.6	12.3	Ps100872	Ps000201	Ps100872	Ps000228	0.0135547	B	A	B	B	B	B	A	A	A	B	A	B	B	B	A	A	B	-	B	B	A	B	-	B	B	B	B	B	-	A	A	B	-	-	B	A	B	B	B	B	B	B
Ps103774	3.6	13.5	Ps000201	Ps000228	Ps100872	Ps000228	0.0253473	B	A	B	-	B	B	A	A	A	B	A	B	-	B	A	A	B	B	B	B	A	B	A	B	B	B	B	B	-	A	A	B	B	A	B	A	B	B	B	B	B	B
Ps161533	3.6	10.8	Ps100872	Ps000201	Ps100872	Ps000228	0.0136637	B	-	B	B	-	B	A	A	A	-	A	-	B	B	-	A	B	B	B	B	A	B	A	B	-	B	B	-	B	-	A	-	B	A	B	A	B	B	B	-	B	B
Ps142384	3.6	12	Ps000201	Ps000228	Ps100872	Ps000228	0.0191496	B	A	B	B	B	-	A	A	A	B	-	B	B	B	A	A	B	B	B	-	A	B	A	B	B	B	B	-	B	A	A	B	B	A	B	-	B	B	B	-	B	B
Ps148016	3.6	12	Ps100872	Ps000201	Ps100872	Ps000228	0.00442653	B	A	B	B	B	B	A	A	A	B	A	B	-	B	-	A	B	B	B	B	A	B	A	-	B	B	B	B	B	-	-	-	-	-	B	A	B	B	B	B	B	B
Ps107827	3.6	12.9	Ps100872	Ps000201	Ps100872	Ps000228	0.0158613	-	A	B	B	B	-	A	A	A	B	A	B	B	B	A	A	-	B	B	B	A	B	A	B	B	B	B	B	B	-	A	B	B	A	B	A	B	B	B	B	B	B
Ps157462	3.6	11.1	Ps000201	Ps000228	Ps100872	Ps000228	0.00944417	B	A	B	B	B	B	A	A	A	-	A	B	B	B	A	A	B	B	B	-	A	B	-	B	-	B	B	B	-	-	A	B	B	-	B	-	B	B	B	B	B	B
Ps143694	3.6	12	Ps100872	Ps000201	Ps100872	Ps000228	0.0423302	B	A	-	B	B	-	A	A	A	B	A	B	B	B	A	-	B	B	B	B	A	B	A	-	B	B	B	B	-	A	A	-	B	A	B	A	B	B	B	B	-	B
Ps152598	3.6	11.4	Ps100872	Ps000201	Ps100872	Ps000228	0.037373	B	A	-	B	-	B	A	A	A	B	-	-	B	B	A	A	B	B	B	B	A	B	-	B	B	B	B	B	B	A	A	-	-	A	B	A	-	B	B	B	B	B
Ps147627	3.6	11.7	Ps100872	Ps000201	Ps100872	Ps000228	0.00442653	B	-	B	B	B	-	A	A	A	B	A	B	B	B	-	A	B	B	B	B	A	B	A	B	B	B	-	-	B	-	A	B	-	A	B	A	B	B	B	B	B	B
Ps122925	3.6	12.9	Ps100872	Ps000201	Ps100872	Ps000228	0.00952879	B	A	B	B	B	-	A	A	A	B	A	-	-	B	A	A	B	B	B	B	A	B	-	B	B	B	B	B	B	A	-	B	B	A	B	A	B	B	B	B	B	B
Ps142765	3.6	12	Ps000201	Ps000228	Ps100872	Ps000228	0.0191496	B	A	B	-	-	-	-	A	A	-	A	B	B	B	-	A	B	B	B	B	A	B	A	B	B	B	B	B	B	A	A	B	B	A	B	A	-	B	B	B	B	B
Ps118066	3.6	12.6	Ps000201	Ps000228	Ps100872	Ps000228	0.00952879	B	A	B	-	B	B	A	A	A	B	-	B	B	B	A	A	B	B	B	B	A	B	A	B	B	B	B	B	-	A	A	B	B	A	B	A	B	B	B	-	B	B
Ps117699	3.6	12.6	Ps000201	Ps000228	Ps100872	Ps000228	0.00376182	B	A	B	-	B	B	A	-	A	B	A	B	B	B	A	A	B	B	B	B	A	B	A	B	B	B	B	B	-	A	-	B	B	A	B	A	B	B	B	B	B	B
Ps129038	3.6	12.6	Ps100872	Ps000201	Ps100872	Ps000228	0.0135547	B	A	B	B	B	B	A	A	-	B	-	B	-	B	A	A	B	B	B	B	A	B	A	B	B	B	B	B	-	A	A	-	B	A	B	A	B	B	-	B	B	B
Ps154280	3.6	11.4	Ps100872	Ps000201	Ps100872	Ps000260	0.0163092	B	A	B	-	B	B	A	A	A	B	-	B	B	B	-	A	B	B	B	-	A	B	A	-	B	B	B	B	B	A	A	-	B	A	B	A	B	B	B	B	-	B
Ps113070	3.6	13.2	Ps100872	Ps000201	Ps100872	Ps000228	0.00665561	B	A	B	B	B	B	A	A	A	B	A	B	-	B	A	A	B	B	-	B	-	B	A	B	B	B	B	B	B	A	A	B	B	A	B	A	B	B	B	B	B	B
Ps158599	3.6	11.1	Ps100872	Ps000201	Ps100872	Ps000228	0.0231409	B	A	B	B	B	-	A	A	-	B	A	-	B	B	A	-	B	B	-	B	A	-	A	B	B	B	-	B	-	A	A	B	B	A	B	A	B	B	B	B	B	B
Ps106726	3.6	13.5	Ps100872	Ps000201	Ps100872	Ps000228	0.0253473	B	A	B	B	B	-	A	A	A	B	A	B	-	B	A	A	-	B	B	B	A	B	A	B	B	B	B	B	B	A	A	B	B	A	B	A	B	B	B	B	B	B
Ps126355	3.6	12.6	Ps100872	Ps000201	Ps100872	Ps000228	0.00202823	B	A	B	B	B	B	A	A	A	B	A	-	-	B	A	A	B	B	B	B	A	B	-	B	B	B	B	B	B	A	A	B	B	-	B	-	B	B	B	B	B	B
Ps127980	3.6	12.3	Ps000201	Ps000228	Ps100872	Ps000228	0.00202823	B	A	B	-	B	-	-	-	A	B	A	B	B	B	A	A	B	B	B	B	A	B	A	B	B	B	B	B	B	-	-	B	B	A	B	A	B	B	B	B	B	B
Ps141890	3.6	12	Ps100872	Ps000201	Ps100872	Ps000228	0.0423302	B	A	B	B	B	B	A	A	A	-	A	B	B	B	A	A	B	B	-	B	A	B	A	B	B	B	B	-	B	A	A	B	B	A	B	A	B	B	-	-	B	B
Ps154550	3.6	11.7	Ps100872	Ps000201	Ps100872	Ps000228	0.0163092	B	A	B	B	B	-	A	A	A	B	A	-	-	-	-	-	-	B	B	B	A	B	-	B	B	B	B	B	B	A	A	B	B	A	B	A	-	B	B	B	B	B
Ps157021	3.6	11.4	Ps100872	Ps000201	Ps100872	Ps000228	0.0781691	B	A	B	B	-	-	A	A	A	-	A	-	B	B	A	A	B	B	B	B	A	B	-	-	B	B	B	B	-	A	A	B	B	A	B	A	B	B	B	-	B	B
Ps148686	3.6	11.7	Ps100872	Ps000201	Ps100872	Ps000228	0.011412	B	A	B	B	B	-	A	A	A	B	-	B	B	-	A	A	B	B	B	B	-	B	A	B	-	B	-	B	B	A	A	B	B	-	B	A	-	B	B	B	B	B
Ps159955	3.6	11.4	Ps100872	Ps000201	Ps100872	Ps000228	0.104757	B	A	B	B	B	-	A	A	A	B	A	B	-	B	A	A	-	B	B	B	A	B	A	B	-	B	-	B	B	A	A	-	B	A	B	A	-	B	B	B	-	B
Ps105981	3.6	13.5	Ps100872	Ps000201	Ps100872	Ps000228	0.0112701	B	A	B	B	B	B	A	-	A	B	A	B	-	B	A	A	B	B	B	B	A	B	A	B	B	B	-	B	B	A	A	B	B	A	B	A	B	B	B	B	B	B
Ps126415	3.6	12.6	Ps100872	Ps000201	Ps100872	Ps000228	0.00547855	B	A	B	B	B	B	-	A	A	-	A	B	-	B	A	-	B	B	B	B	A	B	A	B	B	B	B	B	B	A	A	B	B	A	B	-	B	B	B	B	B	B
Ps101253	3.6	13.5	Ps000201	Ps000228	Ps100872	Ps000228	0.0183207	B	A	B	-	B	B	A	A	A	B	A	B	B	B	A	A	B	B	B	B	A	B	A	B	B	B	B	B	B	A	A	B	-	A	B	A	B	B	B	B	B	B
Ps146266	3.6	11.7	Ps100872	Ps000201	Ps100872	Ps900115	0.113846	B	A	B	-	B	B	A	A	A	-	A	B	B	B	A	A	B	B	B	-	A	-	A	B	B	-	B	B	B	A	A	-	B	A	B	A	B	-	B	B	B	B
Ps118031	3.6	12.9	Ps100872	Ps000201	Ps100872	Ps000228	0.0474254	B	A	B	B	B	B	A	A	A	-	A	B	-	-	A	A	B	-	B	B	A	B	A	B	B	B	B	B	B	A	A	-	B	A	B	A	B	B	B	B	B	B
Ps146303	3.6	12	Ps100872	Ps000201	Ps100872	Ps000228	0.011412	B	A	B	B	B	-	-	A	A	B	A	B	-	B	A	A	B	B	B	B	A	B	A	-	B	B	B	B	-	-	-	B	B	A	B	A	B	B	B	B	B	B
Ps119675	3.6	12.6	Ps100872	Ps000201	Ps100872	Ps000228	0.00136255	B	A	B	B	B	B	A	A	-	B	-	-	B	B	A	-	B	B	B	B	A	B	A	B	B	B	B	B	B	A	A	B	B	-	B	A	B	B	B	B	B	B
Ps127710	3.6	12.3	Ps100872	Ps000201	Ps100872	Ps000228	0.0135547	B	A	B	B	-	B	A	A	A	B	-	B	B	B	A	A	B	B	B	B	A	B	A	-	B	-	B	B	B	A	-	B	B	A	B	A	B	B	B	B	B	B
Ps107565	3.6	13.2	Ps100872	Ps000201	Ps100872	Ps000228	0.00256883	B	A	B	B	B	B	A	A	A	B	A	B	-	B	A	A	B	B	B	B	A	B	-	B	B	B	B	B	B	-	-	B	B	A	B	A	B	B	B	B	B	B
Ps162587	3.6	10.8	Ps100872	Ps000201	Ps100872	Ps000228	0.0955807	B	A	B	B	B	-	A	A	-	B	A	B	-	B	-	A	-	-	-	B	A	B	A	B	B	B	B	B	B	A	A	B	B	A	B	A	-	-	-	B	B	B
Ps138288	3.6	12	Ps100872	Ps000201	Ps100872	Ps000228	0.0191496	-	A	-	B	-	-	A	A	A	B	A	B	B	B	A	A	B	B	B	B	-	B	A	B	B	B	B	B	B	A	A	B	B	-	B	A	B	B	-	B	B	B
Ps148525	3.6	11.7	Ps100872	Ps000201	Ps100872	Ps000228	0.011412	B	-	B	B	B	-	A	A	-	B	A	B	B	B	A	A	B	-	B	B	A	B	A	B	B	B	B	B	B	A	A	B	B	A	B	A	B	B	B	B	B	B
Ps135950	3.6	12.3	Ps000201	Ps000228	Ps100872	Ps000228	0.0423302	B	A	B	-	B	B	A	A	A	-	A	B	-	B	A	A	B	-	B	B	A	B	A	B	B	B	B	B	B	A	A	B	B	A	B	A	B	-	B	B	B	B
Ps102705	3.6	13.2	Ps100872	Ps000201	Ps100872	Ps000228	0.0253473	B	A	B	B	B	B	A	A	A	B	A	-	B	B	A	A	B	B	-	B	A	-	A	B	B	B	B	B	B	A	A	B	B	A	B	A	B	B	B	B	B	B
Ps158443	3.6	11.4	Ps100872	Ps000201	Ps100872	Ps000228	0.0515759	B	A	B	B	B	B	A	A	A	-	A	B	-	B	A	A	B	-	B	B	A	B	A	B	B	B	B	B	-	A	-	B	B	A	B	A	-	-	B	B	-	B
Ps103589	3.6	13.2	Ps100872	Ps000201	Ps100872	Ps000228	0.0253473	B	A	B	B	B	B	A	A	A	B	A	B	B	B	A	A	B	B	B	B	A	B	A	B	B	B	B	B	-	A	A	B	B	A	B	A	B	B	-	B	B	B
Ps107324	3.6	12.9	Ps100872	Ps000201	Ps100872	Ps000228	0.00256883	B	A	B	B	B	B	A	A	A	B	A	-	B	B	A	A	B	B	B	B	A	B	-	B	B	B	B	B	B	A	A	B	B	-	B	-	B	B	B	B	B	B
Ps111215	3.6	12.9	Ps100872	Ps000201	Ps100872	Ps000228	0.00256883	B	A	B	B	B	B	-	A	A	B	A	B	B	B	A	A	B	B	B	B	A	B	-	B	B	B	B	-	B	A	A	B	B	A	B	A	B	B	B	B	B	B
Ps148186	3.6	12	Ps000201	Ps000228	Ps100872	Ps000228	0.0577796	B	A	B	B	B	-	A	A	-	B	A	B	-	-	A	A	B	B	B	-	A	B	A	B	-	B	B	-	-	A	A	B	B	A	B	A	B	B	B	B	B	B
Ps134452	3.6	12.3	Ps100872	Ps000201	Ps100872	Ps000228	0.0135547	-	A	B	B	-	B	A	A	A	B	A	B	B	B	A	A	B	B	B	B	A	B	A	B	B	B	B	-	B	-	A	B	B	A	-	A	B	B	B	B	B	B
Ps124944	3.6	12.3	Ps000201	Ps000228	Ps100872	Ps000228	0.0307536	B	A	B	-	B	B	A	A	A	B	A	B	B	B	A	A	B	B	B	B	A	B	A	B	B	B	B	-	B	A	-	B	-	A	B	A	B	-	-	B	B	B
Ps139987	3.6	12	Ps100872	Ps000201	Ps100872	Ps000228	0.0191496	B	-	B	B	B	B	A	A	A	B	A	B	B	-	A	A	B	B	B	B	A	B	-	B	B	B	B	B	B	A	A	B	B	A	B	A	-	B	B	-	-	-
Ps137123	3.6	12	Ps100872	Ps000201	Ps100872	Ps000228	0.0423302	B	A	-	B	B	B	-	A	A	B	A	B	B	-	A	A	B	B	B	B	A	-	A	B	B	-	B	B	B	A	A	B	B	A	B	A	B	B	B	-	B	B
Ps136218	3.6	12.3	Ps100872	Ps000201	Ps100872	Ps000228	0.00793192	B	A	B	B	B	B	A	A	A	B	A	-	-	B	-	-	B	B	B	B	A	B	A	B	B	B	B	B	B	A	A	B	-	A	B	A	B	B	B	B	-	B
Ps107187	3.6	12.9	Ps100872	Ps000201	Ps100872	Ps000228	0.00256883	B	A	B	B	B	B	A	A	A	B	A	B	B	B	A	A	B	B	B	B	A	B	A	B	B	B	B	B	B	-	A	B	B	-	B	-	B	B	B	B	B	B
Ps118742	3.6	12.6	Ps100872	Ps000201	Ps100872	Ps000228	0.00952879	B	A	B	B	B	-	A	A	A	B	-	B	B	B	A	A	B	B	B	B	A	B	A	B	B	B	B	B	B	-	A	B	B	A	B	A	-	-	B	B	B	B
Ps156489	3.6	11.4	Ps100872	Ps000201	Ps100872	Ps000228	0.037373	B	A	B	B	B	B	A	A	A	B	A	B	B	B	A	-	B	B	B	B	A	-	A	B	B	B	B	-	-	A	A	-	-	A	B	A	-	B	B	-	B	B
Ps156148	3.6	11.4	Ps100872	Ps000201	Ps100872	Ps000228	0.037373	B	A	B	B	B	-	A	-	A	B	A	B	B	B	A	A	B	-	B	B	A	-	A	B	B	B	-	B	B	A	A	B	B	A	B	A	B	B	-	B	-	B
Ps135344	3.6	12	Ps000201	Ps000228	Ps100872	Ps000228	0.0858128	B	A	B	-	-	B	A	A	A	-	A	B	B	-	A	A	B	B	B	B	A	B	A	B	B	B	B	B	-	A	A	B	B	A	B	A	B	B	B	B	-	B
Ps111633	3.6	12.9	Ps100872	Ps000201	Ps100872	Ps000228	0.0348085	B	A	-	B	B	B	A	A	A	B	A	B	B	B	A	A	B	B	B	B	A	B	A	B	B	B	B	-	B	A	A	B	B	A	-	A	B	B	-	B	B	B
Ps113518	3.6	12.9	Ps100872	Ps000201	Ps100872	Ps000228	0.00665561	B	A	B	B	B	B	A	A	A	B	A	B	B	-	A	A	B	B	B	B	A	-	-	B	B	B	B	B	B	A	-	B	B	A	B	A	B	B	B	B	B	B
Ps152589	3.6	11.4	Ps100872	Ps000201	Ps100872	Ps000228	0.0163092	B	A	B	B	B	B	-	A	A	-	A	B	B	B	A	A	-	-	B	B	A	B	-	B	B	B	B	B	-	A	A	B	B	A	B	-	B	-	B	B	B	B
Ps154295	3.6	11.7	Ps100872	Ps000201	Ps100872	Ps000228	0.037373	B	A	B	B	B	-	A	A	-	B	A	B	-	B	A	A	B	B	-	B	A	B	-	B	-	B	B	B	B	A	A	B	B	A	B	A	B	B	B	B	-	B
Ps137573	3.6	12	Ps100872	Ps000201	Ps100872	Ps000228	0.00793192	B	A	B	B	-	B	A	A	A	B	-	B	B	B	A	A	B	B	B	B	A	B	A	B	B	-	B	B	-	A	A	B	B	-	B	-	B	B	B	-	B	B
Ps108732	3.6	12.9	Ps100872	Ps000201	Ps100872	Ps000228	0.0158613	B	A	B	B	B	B	A	A	A	B	-	B	B	-	A	A	B	B	B	B	A	B	A	B	B	B	-	B	B	A	A	B	B	A	B	A	B	B	B	B	B	B
Ps118882	3.6	12.6	Ps000201	Ps000228	Ps100872	Ps000228	0.00952879	B	-	-	-	B	B	A	A	A	B	A	B	B	B	A	-	B	B	B	B	A	B	A	B	B	B	B	B	B	A	A	B	B	A	B	A	B	B	B	-	B	B
Ps128032	3.6	12.3	Ps100872	Ps000201	Ps100872	Ps000228	0.00547855	-	A	B	B	B	B	A	A	A	B	-	B	B	B	-	A	B	B	B	B	A	B	A	B	B	B	B	B	-	-	A	B	B	A	B	A	B	B	-	B	B	B
Ps112200	3.6	12.9	Ps100872	Ps000201	Ps100872	Ps000228	0.0348085	B	A	B	B	B	B	A	A	A	B	A	B	B	B	A	A	B	B	B	B	A	B	A	B	-	B	B	-	-	A	A	B	B	A	B	A	B	B	B	B	B	B
Ps139292	3.6	12	Ps100872	Ps000201	Ps100872	Ps000228	0.0191496	B	A	B	B	B	-	A	A	A	B	-	B	B	B	A	-	B	B	-	B	A	B	A	-	B	B	B	B	B	A	A	B	-	A	B	A	B	B	B	B	B	B
Ps134604	3.6	12.3	Ps100872	Ps000201	Ps100872	Ps000228	0.00547855	-	A	B	B	B	-	A	A	A	B	A	B	B	B	A	A	B	B	B	B	A	B	-	B	B	B	B	B	B	-	A	B	-	-	B	A	B	B	B	B	B	B
Ps131881	3.6	12.6	Ps000201	Ps000228	Ps100872	Ps000228	0.0307536	B	A	B	-	-	B	-	A	A	B	A	B	-	B	A	A	B	B	B	B	A	B	A	B	B	B	B	B	B	A	A	B	B	A	B	A	B	B	-	B	B	B
Ps148852	3.6	11.7	Ps100872	Ps000201	Ps100872	Ps000228	0.0577796	B	A	B	B	B	B	A	A	A	B	A	B	B	B	A	A	B	B	B	B	A	-	A	B	B	B	B	B	-	A	-	-	-	A	-	A	B	B	B	B	B	B
Ps154387	3.6	11.4	Ps100872	Ps000201	Ps100872	Ps000228	0.00648531	B	-	B	B	-	B	A	A	-	B	-	B	B	-	A	A	B	B	B	B	A	B	-	B	B	B	B	B	B	A	A	B	B	A	B	A	B	B	-	B	-	B
Ps113941	3.6	13.2	Ps100872	Ps000201	Ps100872	Ps000228	0.0158613	-	A	B	B	B	B	A	A	A	B	A	B	-	B	A	A	B	B	B	B	A	B	A	B	B	B	B	B	B	A	A	B	B	A	B	A	B	B	B	B	B	B
Ps146026	3.6	11.7	Ps100872	Ps000201	Ps100872	Ps000228	0.0015654	B	A	B	B	B	B	A	A	A	B	A	B	B	B	A	A	B	-	B	B	A	B	-	B	B	-	B	B	B	-	-	B	B	-	B	-	B	B	B	B	B	B
Ps154082	3.6	11.7	Ps100872	Ps000201	Ps100872	Ps000228	0.037373	B	A	B	B	B	-	A	-	A	B	-	B	-	B	A	A	B	B	B	B	A	-	A	B	B	-	B	B	-	A	A	B	B	A	B	A	-	B	B	B	B	B
Ps102329	3.6	13.5	Ps100872	Ps000201	Ps100872	Ps000228	0.0183207	B	A	B	B	B	-	A	A	A	B	A	B	B	B	A	A	B	B	B	B	A	B	A	B	B	B	B	B	B	A	A	B	B	A	B	A	B	B	B	B	B	B
Ps104177	3.6	13.2	Ps100872	Ps000201	Ps100872	Ps000228	0.0253473	B	A	B	B	-	-	A	A	A	-	A	B	B	B	A	A	B	B	B	B	A	B	A	B	B	B	B	B	B	A	A	B	B	A	B	A	B	B	B	B	B	B
Ps146486	3.6	12	Ps100872	Ps000201	Ps100872	Ps000228	0.011412	B	A	-	B	B	B	A	A	A	B	-	B	-	B	A	A	B	B	B	B	-	-	A	B	B	B	B	B	B	A	A	-	B	A	B	A	B	B	B	B	B	B
Ps158508	3.6	11.4	Ps100872	Ps000201	Ps100872	Ps000228	0.0231409	B	A	-	B	B	-	A	A	-	B	A	-	-	B	A	-	-	B	B	B	A	B	A	B	B	B	B	-	B	A	A	B	B	A	B	-	B	B	B	B	B	B
Ps137839	3.6	12	Ps100872	Ps000201	Ps100872	Ps000228	0.0191496	B	A	B	B	-	B	A	-	A	B	A	B	B	-	A	A	B	B	B	B	A	B	A	B	B	B	-	-	B	A	A	B	B	A	B	A	B	B	B	B	B	B
Ps123265	3.6	12.9	Ps100872	Ps000201	Ps100872	Ps000228	0.00952879	B	A	B	B	B	B	-	A	A	B	-	B	-	B	A	A	B	B	B	B	A	B	A	B	B	-	B	B	B	A	A	-	B	A	B	A	B	B	B	B	B	B
Ps138837	3.6	12	Ps100872	Ps000201	Ps100872	Ps000228	0.0191496	B	-	B	B	B	B	-	A	A	B	A	B	B	-	A	A	-	B	B	B	A	B	A	B	B	B	-	B	-	A	A	B	B	A	B	A	-	B	B	B	B	B
Ps105289	3.6	13.2	Ps000201	Ps000228	Ps100872	Ps000228	0.0253473	B	A	B	-	B	-	A	A	A	B	A	B	B	B	A	A	B	B	B	B	A	B	A	B	B	B	B	B	-	A	A	B	B	A	B	A	B	B	B	B	B	B
Ps153282	3.6	11.4	Ps000201	Ps000228	Ps100872	Ps000228	0.00234673	B	A	B	B	B	-	A	A	A	B	-	B	B	B	A	A	B	B	B	-	A	B	-	-	B	B	B	B	B	-	-	B	B	A	B	A	B	B	-	B	B	B
Ps114809	3.6	12.6	Ps100872	Ps000201	Ps100872	Ps000228	0.0221679	-	A	B	B	B	-	A	A	A	B	A	B	B	B	A	A	B	B	B	B	A	B	A	B	B	B	B	-	B	-	A	B	B	A	B	A	B	B	B	B	B	B
Ps157324	3.6	11.1	Ps000201	Ps000228	Ps100872	Ps000228	0.00350048	B	A	B	-	B	B	A	A	-	B	A	B	B	B	A	A	B	-	B	B	A	B	A	-	B	B	B	B	B	-	-	B	B	A	-	-	B	B	B	B	B	B
Ps142124	3.6	12	Ps100872	Ps000201	Ps100872	Ps000228	0.0191496	B	A	B	B	B	-	A	A	A	B	-	-	B	B	A	-	B	B	B	B	A	B	A	B	-	B	-	B	B	A	A	B	B	A	B	A	B	B	B	B	B	B
Ps100205	3.6	13.8	Ps100872	Ps000201	Ps100872	Ps000228	0.0131491	B	A	B	B	B	-	A	A	A	B	A	B	B	B	A	A	B	B	B	B	A	B	A	B	B	B	B	B	B	A	A	B	B	A	B	A	B	B	B	B	B	B
Ps120863	3.6	12.6	Ps100872	Ps000201	Ps100872	Ps000228	0.00376182	B	-	B	B	B	B	A	A	A	B	A	B	B	B	-	A	B	B	B	B	A	B	A	B	B	-	B	B	B	A	A	-	B	A	B	A	B	B	B	B	B	B
Ps159456	3.6	11.1	Ps100872	Ps000201	Ps100872	Ps000228	0.104757	B	A	-	B	B	-	A	A	A	B	A	B	B	B	A	A	-	B	-	B	A	-	A	B	-	B	B	B	B	A	A	-	B	A	-	-	B	B	B	-	B	B
Ps119332	3.6	12.6	Ps100872	Ps000201	Ps100872	Ps000228	0.00952879	B	A	B	B	B	B	A	A	A	B	A	B	B	B	A	A	B	B	B	B	-	B	A	B	B	B	B	-	B	A	A	B	-	A	B	-	B	-	B	B	B	B
Ps124195	3.6	12.6	Ps100872	Ps000201	Ps100872	Ps000228	0.0221679	-	A	B	B	B	-	A	A	A	B	A	B	B	B	A	A	B	B	B	B	A	B	A	B	B	B	-	B	B	A	A	B	B	A	B	A	B	-	B	B	B	B
Ps136731	3.6	12	Ps100872	Ps000201	Ps100872	Ps000228	0.0191496	B	A	-	B	B	-	A	A	A	B	A	B	B	B	A	-	B	B	B	B	A	B	A	-	B	B	B	B	B	A	A	B	-	A	-	A	B	B	B	B	B	B
Ps144976	3.6	11.7	Ps000201	Ps000228	Ps100872	Ps000228	0.011412	B	A	B	-	B	B	A	A	A	B	A	B	B	B	-	A	-	B	-	B	-	-	A	B	B	B	B	B	B	-	A	B	B	A	B	A	B	B	B	B	B	B
Ps141765	3.6	12	Ps100872	Ps000201	Ps100872	Ps000228	0.00793192	-	A	B	B	B	-	A	-	A	-	A	B	B	B	-	A	B	B	B	B	A	B	A	B	B	B	B	B	B	A	A	B	B	-	B	A	B	B	B	B	B	B
Ps116968	3.6	12.9	Ps100872	Ps000201	Ps100872	Ps000228	0.0474254	B	A	B	B	B	B	A	A	A	B	A	-	-	B	A	A	B	-	B	B	A	B	A	B	B	B	B	B	B	A	A	B	B	A	B	A	B	B	B	-	B	B
Ps112825	3.6	13.2	Ps100872	Ps000201	Ps100872	Ps000228	0.0158613	B	A	B	B	-	-	A	A	A	B	A	B	-	B	A	A	B	B	B	B	A	B	A	B	B	B	B	B	B	-	A	B	B	A	B	A	B	B	B	B	B	B
Ps118543	3.6	12.6	Ps100872	Ps000201	Ps100872	Ps000228	0.00952879	B	A	B	B	B	-	-	A	A	-	A	B	B	B	A	A	B	B	B	B	-	B	A	B	B	B	B	-	B	A	A	B	B	A	B	A	B	B	B	B	B	B
Ps116910	3.6	12.9	Ps100872	Ps000201	Ps100872	Ps000228	0.0221679	B	A	B	B	-	B	A	A	A	B	A	B	-	-	-	A	B	B	B	B	A	B	A	B	B	B	-	B	B	A	A	B	B	A	B	A	B	B	B	B	B	B
Ps126010	3.6	12.3	Ps100872	Ps000201	Ps100872	Ps000228	0.0135547	B	A	B	B	B	B	A	A	A	B	A	B	B	B	A	-	B	B	B	B	A	B	A	B	B	B	B	B	B	-	A	B	-	A	B	A	B	B	B	-	B	B
Ps155168	3.6	11.4	Ps100872	Ps000201	Ps100872	Ps900115	0.037373	B	A	B	-	B	B	A	A	A	-	A	B	B	-	A	A	B	B	B	-	A	B	A	B	B	B	-	B	B	-	A	B	B	A	B	-	B	B	B	B	B	-
Ps145715	3.6	11.7	Ps000201	Ps000228	Ps100872	Ps000228	0.0268567	B	A	B	-	B	B	-	A	A	B	-	-	B	B	A	A	B	B	B	B	A	B	A	B	B	B	B	B	-	A	A	B	B	A	B	A	B	B	-	B	B	B
Ps134533	3.6	12.6	Ps100872	Ps000201	Ps100872	Ps000228	0.0135547	B	A	-	B	B	B	A	A	A	B	A	B	-	B	A	A	B	-	B	B	A	B	-	B	-	B	B	B	B	-	A	B	B	A	B	A	B	B	B	B	B	B
Ps147533	3.6	11.7	Ps100872	Ps000201	Ps100872	Ps000228	0.0268567	B	-	B	B	B	-	A	A	A	B	A	B	B	-	A	A	B	B	B	B	-	B	A	B	B	B	B	B	-	A	A	B	B	A	-	A	B	B	-	B	B	-
Ps139872	3.6	12.3	Ps100872	Ps000201	Ps100872	Ps000228	0.00793192	B	A	-	B	B	B	A	A	A	-	A	B	-	B	A	A	B	B	B	B	A	B	A	B	B	B	B	B	B	-	A	B	B	-	B	A	B	B	B	B	B	B
Ps117944	3.6	12.6	Ps100872	Ps000201	Ps100872	Ps000228	0.0221679	B	A	B	B	B	-	A	A	A	-	A	B	B	B	A	A	B	-	B	B	A	-	A	B	B	B	B	B	B	A	-	B	B	A	B	A	B	B	B	B	B	B
Ps161089	3.6	11.1	Ps000201	Ps000228	Ps100872	Ps000228	0.070546	-	A	B	-	-	-	-	A	-	B	A	B	-	B	A	A	B	B	B	B	A	B	A	B	B	B	B	B	-	A	A	B	B	A	B	A	B	-	B	B	-	B
Ps147480	3.6	11.7	Ps000201	Ps000228	Ps100872	Ps000228	0.00442653	B	A	B	-	B	B	A	A	A	B	A	B	B	B	-	A	B	B	B	B	A	B	A	B	B	B	-	B	B	-	A	-	B	-	B	A	B	B	B	B	B	-
Ps136912	3.6	12	Ps100872	Ps000201	Ps100872	Ps000228	0.0191496	B	A	-	B	B	-	A	A	-	B	A	B	B	B	A	A	B	B	B	B	A	B	A	B	B	B	B	-	B	A	-	B	B	A	B	A	-	B	B	B	B	B
Ps147905	3.6	11.7	Ps100872	Ps000201	Ps100872	Ps000228	0.0015654	B	A	B	B	B	B	A	-	A	-	-	-	B	B	A	-	B	B	B	B	A	B	-	B	B	B	B	B	B	A	A	B	B	A	B	-	B	B	B	B	B	B
Ps130945	3.6	12.6	Ps000201	Ps000228	Ps100872	Ps000228	0.00547855	B	-	B	-	B	B	A	A	A	B	A	B	-	B	A	A	B	B	B	B	A	B	A	B	B	B	B	-	B	A	-	B	B	A	B	-	B	B	B	B	B	B
Ps106426	3.6	13.2	Ps100872	Ps000201	Ps100872	Ps000228	0.0112701	B	A	B	B	B	-	A	A	-	B	A	B	B	B	A	A	B	B	B	B	A	B	A	B	B	B	B	B	B	A	A	B	B	A	B	A	B	B	B	B	B	-
Ps119005	3.6	12.9	Ps000201	Ps000228	Ps100872	Ps000228	0.00376182	B	-	B	-	B	B	A	A	A	B	A	B	-	B	A	-	B	B	B	B	A	B	-	B	B	B	B	B	B	A	A	B	B	A	B	A	B	B	B	B	B	B
Ps117081	3.6	12.6	Ps100872	Ps000201	Ps100872	Ps000228	0.0221679	B	A	B	B	B	B	A	A	-	B	A	B	B	B	A	A	B	B	B	B	A	B	A	-	B	B	B	B	B	A	A	B	B	A	B	A	B	B	B	-	B	-
Ps105185	3.6	13.2	Ps100872	Ps000201	Ps100872	Ps000228	0.0253473	B	A	B	B	B	-	A	A	A	-	A	B	B	B	A	A	B	B	B	B	A	B	A	B	B	B	B	B	B	A	A	B	B	A	B	A	B	B	-	B	B	B
Ps134948	3.6	12.3	Ps100872	Ps000201	Ps100872	Ps000228	0.0135547	-	A	B	B	-	-	A	A	A	B	A	B	B	B	A	A	B	B	B	B	A	B	-	-	B	B	B	B	B	A	A	B	B	A	B	A	B	B	B	B	B	B
Ps104628	3.6	13.5	Ps100872	Ps000201	Ps100872	Ps000228	0.0253473	B	A	B	B	B	B	A	A	A	B	A	B	-	-	A	A	B	B	B	B	A	B	A	B	B	B	B	B	B	A	A	B	B	A	B	A	B	B	B	B	B	B
Ps113793	3.6	12.9	Ps000201	Ps000228	Ps100872	Ps000228	0.0158613	-	A	B	B	B	B	A	-	A	B	A	B	B	B	A	A	B	-	B	-	A	B	A	B	B	B	B	B	B	A	A	B	B	A	B	A	B	B	B	B	B	B
Ps138088	3.6	12	Ps100872	Ps000201	Ps100872	Ps000228	0.00300426	-	A	B	B	B	B	-	A	-	-	-	B	B	B	A	A	B	B	B	B	-	B	A	B	-	B	B	B	B	A	A	B	B	A	B	A	B	B	B	B	B	B
Ps148905	3.6	12	Ps100872	Ps000201	Ps100872	Ps000228	0.00442653	B	A	B	B	B	-	A	A	A	B	A	B	-	-	A	-	B	B	B	B	A	B	-	B	-	B	B	B	B	A	-	B	B	-	B	A	B	B	B	B	B	B
Ps119114	3.6	12.6	Ps100872	Ps000201	Ps100872	Ps000228	0.00136255	B	A	B	B	B	B	A	A	A	B	A	B	B	B	-	A	B	B	B	B	A	B	-	B	B	B	B	B	B	-	-	B	B	A	B	A	B	B	B	B	B	-
Ps155108	3.6	11.4	Ps000201	Ps000228	Ps100872	Ps000228	0.00648531	B	A	B	B	B	-	-	A	A	-	-	B	B	B	A	A	B	B	B	-	A	B	-	B	B	B	B	B	B	A	A	B	B	A	B	-	B	-	B	B	B	B
Ps104456	3.6	13.2	Ps100872	Ps000201	Ps100872	Ps000228	0.0253473	B	A	B	B	B	B	A	A	A	B	A	-	B	B	A	A	B	B	B	B	A	B	A	B	B	B	B	B	B	A	A	-	B	A	B	A	B	B	-	B	B	B
Ps146573	3.6	12	Ps100872	Ps000201	Ps100872	Ps000228	0.0268567	B	A	B	B	B	B	A	A	-	-	A	B	-	B	A	A	-	B	-	B	A	B	A	B	-	B	-	B	B	A	A	B	B	-	B	A	B	B	B	B	B	B
Ps138616	3.6	12.3	Ps100872	Ps000201	Ps100872	Ps000228	0.0191496	B	-	B	B	B	-	A	A	A	B	A	B	-	-	A	A	B	B	B	B	A	B	A	B	B	B	B	B	-	A	A	B	B	-	B	A	B	B	B	B	B	-
Ps137444	3.6	12	Ps100872	Ps000201	Ps100872	Ps000228	0.00103936	B	A	B	B	B	B	A	-	A	B	A	B	B	B	A	A	B	B	B	B	A	B	-	B	B	B	B	B	-	A	-	B	B	A	B	A	B	B	-	B	B	B
Ps145343	3.6	11.7	Ps100872	Ps000201	Ps100872	Ps000228	0.0268567	B	A	B	B	B	B	-	A	A	B	A	-	B	-	A	A	B	B	B	B	A	B	A	-	B	B	B	B	-	A	A	B	-	A	B	-	B	-	B	B	B	B
Ps151820	3.6	11.7	Ps000201	Ps000228	Ps100872	Ps000228	0.00442653	-	A	B	B	B	B	A	-	A	-	A	B	B	B	-	A	B	B	B	-	A	B	-	B	B	B	B	B	B	A	A	B	B	-	B	A	B	B	B	B	B	B
Ps114725	3.6	12.6	Ps100872	Ps000201	Ps100872	Ps000228	0.00952879	B	A	B	B	B	B	A	A	A	B	A	-	B	B	A	-	-	B	B	B	A	B	A	B	B	B	B	B	B	A	A	B	B	-	-	A	B	B	B	B	B	B
Ps103687	3.6	13.2	Ps100872	Ps000201	Ps100872	Ps000228	0.00462068	B	-	B	B	B	B	A	A	A	B	A	B	B	B	A	A	B	B	B	B	A	B	A	B	B	B	B	B	B	A	A	B	B	-	B	A	B	B	-	B	B	B
Ps155477	3.6	11.4	Ps100872	Ps000201	Ps100872	Ps000228	0.0163092	B	A	B	B	B	-	A	A	A	B	-	B	B	B	A	A	-	B	-	B	-	B	-	B	-	B	B	B	B	A	A	B	B	A	B	A	B	-	-	B	B	B
Ps145340	3.6	11.7	Ps000201	Ps000228	Ps100872	Ps000228	0.00442653	B	A	B	-	-	B	A	A	A	B	-	-	B	B	A	A	B	B	B	B	A	B	A	B	B	B	B	B	B	-	-	B	B	A	B	-	B	B	B	-	B	B
Ps157239	3.6	11.1	Ps000201	Ps000228	Ps100872	Ps000228	0.0515759	B	A	B	B	B	B	A	A	A	B	A	B	A	B	A	-	-	B	B	-	A	B	A	B	-	B	B	-	-	-	-	B	B	A	B	A	B	B	B	B	B	B
Ps156876	3.6	11.4	Ps100872	Ps000201	Ps100872	Ps000228	0.00648531	B	A	B	B	B	B	A	-	A	B	A	B	B	B	-	A	B	B	B	B	-	-	A	B	B	B	-	B	B	A	A	B	-	A	B	A	B	-	B	B	-	B
Ps159402	3.6	11.1	Ps100872	Ps000201	Ps100872	Ps000228	0.00350048	B	A	B	B	B	B	A	A	A	-	A	B	B	B	A	-	B	B	B	B	A	B	A	B	B	-	B	-	B	-	-	B	B	A	B	-	B	B	B	B	-	B
Ps149304	3.6	11.7	Ps100872	Ps000201	Ps100872	Ps000228	0.0577796	B	-	-	B	B	B	A	A	A	B	A	B	B	B	A	A	-	-	B	B	A	-	A	B	B	B	B	B	-	A	A	B	B	A	B	A	B	B	B	B	B	B
Ps157463	3.6	11.1	Ps100872	Ps000201	NA	Ps000228	0.104757	B	A	B	B	-	-	A	A	-	B	A	B	B	B	A	A	B	B	B	B	A	B	A	B	B	B	B	-	B	A	A	-	-	A	B	A	-	-	-	B	B	-
Ps156083	3.6	11.7	Ps000201	Ps000228	Ps100872	Ps000228	0.0163092	B	A	B	B	B	-	A	A	A	-	A	B	-	B	A	A	B	B	B	-	A	B	-	B	B	B	B	B	B	A	-	B	B	-	B	A	B	B	B	B	B	B
Ps141752	3.6	12	Ps000201	Ps000228	Ps100872	Ps000228	0.0423302	B	A	B	B	B	-	A	A	-	-	A	B	B	B	A	A	B	B	B	-	A	B	A	B	B	B	B	B	-	A	A	B	-	A	B	A	B	B	B	-	B	B
Ps159024	3.6	11.4	Ps100872	Ps000201	Ps100872	Ps000228	0.00944417	B	A	B	B	B	-	A	A	A	B	A	-	-	-	A	A	B	B	B	B	-	B	-	B	B	B	B	B	B	A	-	B	-	A	B	-	B	B	-	B	B	B
Ps101796	3.6	13.8	Ps100872	Ps000201	Ps100872	Ps000228	0.0183207	B	A	B	B	B	-	A	A	A	B	A	B	-	B	A	A	B	B	B	B	A	B	A	B	B	B	B	B	B	A	A	B	B	A	B	A	B	B	B	B	B	B
Ps157169	3.6	11.4	Ps100872	Ps000201	Ps100872	Ps000228	0.0781691	B	A	B	B	B	-	A	A	A	B	A	B	B	B	A	A	B	-	-	B	A	B	-	B	-	-	B	B	B	A	A	B	-	A	B	A	-	B	B	B	B	B
Ps107054	3.6	12.9	Ps100872	Ps000201	Ps100872	Ps000228	0.00665561	B	A	B	B	B	B	A	A	-	B	A	-	B	B	A	A	B	B	B	B	A	B	A	B	B	B	B	B	B	A	-	B	-	A	B	A	B	B	B	B	B	B
Ps154609	3.6	11.7	Ps100872	Ps000201	NA	Ps000228	0.0163092	B	A	B	B	B	B	A	A	A	B	A	B	-	B	A	A	B	B	B	B	A	B	-	B	-	B	B	B	B	A	A	-	B	A	B	-	B	-	B	B	B	-
Ps102553	3.6	13.2	Ps100872	Ps000201	Ps100872	Ps000228	0.0112701	B	A	B	B	B	-	A	A	A	B	A	B	B	B	A	A	B	B	B	B	A	B	A	B	-	B	B	B	B	A	A	B	B	-	B	A	B	B	B	B	B	B
Ps157036	3.6	11.7	Ps000201	Ps000228	Ps100872	Ps000228	0.037373	B	A	B	B	B	B	A	A	A	-	A	B	-	B	A	A	B	B	B	-	-	B	A	B	B	B	B	-	-	-	A	B	B	A	-	A	B	B	B	B	B	B
Ps130702	3.6	12.6	Ps100872	Ps000201	Ps100872	Ps000228	0.0307536	B	A	B	B	B	B	A	A	A	B	A	B	-	B	A	A	B	B	B	B	A	B	A	B	B	B	B	B	-	A	A	B	-	A	B	A	B	B	B	B	B	B
Ps116564	3.6	12.6	Ps100872	Ps000201	Ps100872	Ps000228	0.00952879	B	A	B	B	B	B	A	A	A	B	A	-	B	B	A	-	B	B	B	B	A	B	A	B	B	B	B	B	B	-	A	-	B	A	B	A	B	B	B	-	B	B
Ps149833	3.6	11.7	Ps100872	Ps000201	Ps100872	Ps000228	0.011412	B	-	-	B	B	-	A	A	A	B	A	B	B	B	A	A	B	B	B	B	A	B	A	B	B	B	B	B	B	-	A	-	B	A	B	-	B	B	B	B	-	B
Ps144753	3.6	12	Ps000201	Ps000228	NA	Ps000228	0.00442653	B	A	-	B	B	B	-	A	-	B	A	B	-	B	A	A	B	B	B	B	A	B	A	B	B	B	B	B	B	-	A	B	B	A	B	A	B	-	B	B	B	-
Ps104937	3.6	13.5	Ps100872	Ps000201	Ps100872	Ps000228	0.0253473	B	A	B	B	B	B	A	A	A	B	A	B	-	B	A	A	B	B	B	B	A	B	A	B	B	B	B	B	-	A	A	B	B	A	B	A	B	B	B	B	B	B
Ps102916	3.6	13.2	Ps100872	Ps000201	Ps100872	Ps000228	0.0112701	B	A	B	B	B	-	A	A	A	B	-	B	B	B	A	A	B	B	B	B	A	B	A	B	B	B	B	B	B	A	A	B	B	A	B	A	B	B	-	B	B	B
Ps136160	3.6	12	Ps100872	Ps000201	Ps100872	Ps000228	0.0191496	-	A	B	B	B	B	A	A	A	-	A	B	B	B	A	-	B	B	B	B	A	B	A	B	B	B	B	B	B	A	-	B	-	A	-	A	B	B	B	B	B	B
Ps135167	3.6	12.3	Ps100872	Ps000201	Ps100872	Ps000228	0.00793192	B	-	B	B	B	B	A	A	A	-	A	B	-	B	A	A	B	B	B	B	A	B	A	B	B	B	B	B	B	-	A	B	B	A	B	A	B	B	-	B	B	B
Ps127540	3.6	12.3	Ps100872	Ps000201	Ps100872	Ps000228	0.0135547	B	A	B	B	B	-	A	A	A	B	A	B	B	B	A	A	-	B	B	B	A	B	A	B	B	B	B	-	B	A	A	B	B	A	B	-	B	B	B	B	B	B
Ps115814	3.6	12.6	Ps100872	Ps000201	Ps100872	Ps000228	0.0221679	-	A	B	B	B	B	A	A	A	B	A	B	B	B	A	A	B	-	B	B	A	B	A	B	B	B	B	B	-	A	A	B	B	A	B	-	B	B	-	B	B	B
Ps160601	3.6	10.8	Ps100872	Ps000201	Ps100872	Ps000228	0.0136637	B	A	-	B	B	-	A	-	A	B	A	B	B	B	A	A	-	B	B	B	A	B	A	-	B	-	B	B	B	-	A	B	B	-	B	A	B	B	-	B	-	B
Ps146002	3.6	11.7	Ps100872	Ps000201	Ps100872	Ps000260	0.011412	B	A	B	-	B	-	A	A	A	B	A	B	B	B	-	A	B	B	B	-	-	B	A	B	B	-	B	B	B	-	A	B	B	A	B	A	B	B	-	B	B	B
Ps151796	3.6	12	Ps100872	Ps000201	Ps100872	Ps000228	0.0268567	B	A	B	B	B	B	A	-	-	B	A	-	-	B	A	A	B	B	B	B	A	B	A	B	B	B	B	B	-	A	A	B	B	A	-	A	B	B	B	B	B	-
Ps101379	3.6	13.5	Ps000201	Ps000228	Ps100872	Ps000228	0.0183207	B	A	B	-	B	B	A	A	A	B	A	B	B	B	A	A	-	B	B	B	A	B	A	B	B	B	B	B	B	A	A	B	B	A	B	A	B	B	B	B	B	B
Ps118915	3.6	12.6	Ps100872	Ps000201	Ps100872	Ps000228	0.00952879	B	A	B	B	B	B	A	A	A	B	A	B	B	B	A	A	B	-	B	B	A	B	A	B	B	B	B	B	B	-	A	B	B	A	B	A	B	B	B	-	B	-
Ps127199	3.6	12.3	Ps100872	Ps000201	Ps100872	Ps000228	0.0640775	B	A	B	B	B	B	A	A	A	B	A	-	B	B	A	A	B	B	-	B	A	B	A	B	-	B	B	B	-	A	A	B	B	A	B	A	B	B	B	-	-	B
Ps162605	3.6	10.5	Ps100872	Ps000201	Ps100872	Ps000260	0.0196307	B	A	B	-	B	B	A	A	A	-	-	B	B	-	-	A	-	B	B	-	A	B	-	B	-	B	B	B	-	-	A	B	B	A	B	A	B	B	B	B	B	-
Ps158130	3.6	11.1	Ps000201	Ps000228	Ps100872	Ps000228	0.0231409	-	A	B	-	B	-	A	A	-	B	A	B	B	B	A	A	B	-	B	B	A	B	A	B	B	B	B	B	B	A	A	B	B	-	B	A	B	-	B	B	B	B
Ps137022	3.6	12	Ps000201	Ps000228	Ps100872	Ps000228	0.00793192	B	A	B	B	B	B	A	A	A	B	-	-	B	B	A	-	B	-	B	-	A	B	A	B	B	B	B	B	-	A	A	B	B	A	B	-	B	B	B	B	B	B
Ps130151	3.6	12.3	Ps100872	Ps000201	Ps100872	Ps000228	0.00547855	B	A	B	B	B	B	A	A	A	-	-	B	B	B	A	A	B	B	B	B	A	B	A	B	B	B	B	B	B	A	A	B	B	-	-	A	B	B	B	-	B	B
Ps136627	3.6	12	Ps100872	Ps000201	Ps100872	Ps000228	0.00793192	-	A	B	B	B	B	A	A	A	B	A	B	B	B	A	A	-	B	B	B	A	B	A	B	B	B	B	B	B	A	A	B	-	-	B	A	-	B	B	B	B	B
Ps153457	3.6	11.4	Ps100872	Ps000201	Ps100872	Ps000228	0.0781691	B	A	-	B	B	-	-	A	A	B	A	B	B	-	A	A	B	-	-	B	A	B	A	B	B	B	B	B	-	A	A	B	B	A	B	A	B	B	-	B	-	B
Ps129277	3.6	12.6	Ps100872	Ps000201	Ps100872	Ps000228	0.0307536	B	A	-	B	B	B	A	A	A	B	A	B	-	B	A	A	B	B	B	B	-	B	A	B	B	B	B	B	B	A	A	-	B	A	B	A	B	B	B	B	B	B
Ps137527	3.6	12	Ps000201	Ps000228	Ps100872	Ps000228	0.00793192	B	A	B	-	B	B	A	-	A	B	A	B	B	B	-	A	B	B	B	B	A	B	A	B	B	B	B	B	B	A	A	B	-	A	B	-	-	B	B	B	-	B
Ps113598	3.6	13.2	Ps100872	Ps000201	Ps100872	Ps000228	0.0348085	B	A	B	B	B	-	A	A	A	B	A	B	-	-	A	A	B	B	B	B	A	B	A	B	B	B	B	B	B	A	A	B	B	A	B	A	B	B	B	-	B	B
Ps119621	3.6	12.9	Ps100872	Ps000201	Ps100872	Ps000228	0.00952879	B	A	B	B	B	-	A	A	A	B	A	B	-	B	A	A	B	B	B	B	A	B	-	B	B	B	B	B	B	A	A	B	B	-	B	A	-	B	B	B	B	B
Ps151099	3.6	12	Ps000201	Ps000228	Ps100872	Ps000228	0.011412	B	A	B	B	B	B	A	-	A	B	A	B	-	B	A	A	B	B	B	-	A	B	A	B	B	B	B	B	B	-	A	-	B	A	B	-	B	B	B	B	B	-
Ps152441	3.6	11.4	Ps100872	Ps000201	Ps100872	Ps000228	0.037373	B	A	B	B	B	-	A	A	A	B	A	B	B	-	A	A	B	B	B	B	A	-	A	-	B	B	B	B	B	-	A	-	B	A	-	-	B	B	B	B	B	B
Ps110778	3.6	12.9	Ps100872	Ps000201	Ps100872	Ps000228	0.0158613	B	A	B	B	B	B	A	A	A	B	-	B	B	B	A	A	B	B	B	B	A	B	A	-	B	B	B	B	B	A	A	-	-	A	B	A	B	B	B	B	B	B
Ps100175	3.6	13.8	Ps100872	Ps000201	Ps100872	Ps000228	0.00558098	B	A	B	B	B	B	A	A	-	B	A	B	B	B	A	A	B	B	B	B	A	B	A	B	B	B	B	B	B	A	A	B	B	A	B	A	B	B	B	B	B	B
Ps134538	3.6	12.6	Ps100872	Ps000201	Ps100872	Ps000228	0.0640775	-	A	B	B	B	B	A	A	A	B	A	B	-	B	A	A	B	-	B	B	A	-	A	B	B	B	B	B	B	A	A	-	B	A	B	A	B	-	B	B	B	B
Ps155801	3.6	11.7	Ps100872	Ps000201	Ps100872	Ps000228	0.0163092	B	A	B	B	-	B	-	A	A	B	A	-	-	B	A	A	B	B	B	B	A	B	A	B	-	B	-	B	B	-	A	B	-	A	B	-	B	B	B	B	B	B
Ps105612	3.6	13.2	Ps100872	Ps000201	Ps100872	Ps000228	0.0253473	B	A	B	B	B	B	A	A	A	B	A	B	B	B	A	A	-	B	B	B	A	B	A	B	B	B	B	B	B	A	A	B	-	A	B	A	B	B	B	-	B	B
Ps102226	3.6	13.8	Ps100872	Ps000201	Ps100872	Ps000228	0.0183207	B	A	B	B	B	-	A	A	A	B	A	B	-	B	A	A	B	B	B	B	A	B	A	B	B	B	B	B	B	A	A	B	B	A	B	A	B	B	B	B	B	B
Ps163685	3.6	10.2	Ps100872	Ps000201	NA	Ps900115	0.12819	B	A	B	-	B	-	A	A	A	B	A	-	B	B	A	A	B	B	-	-	A	B	-	B	B	-	B	B	B	A	-	B	-	A	B	A	B	-	B	B	B	-
Ps113185	3.6	12.9	Ps100872	Ps000201	Ps100872	Ps900115	0.0158613	-	-	B	-	B	B	A	A	A	B	A	B	B	B	A	A	B	B	B	-	A	B	A	B	B	B	B	B	B	A	A	B	B	A	B	A	B	B	B	B	B	B
Ps160703	3.6	10.8	Ps000201	Ps000228	Ps100872	Ps000228	0.0325828	B	A	B	B	B	B	A	A	-	B	A	-	B	B	A	A	B	-	B	-	A	B	A	-	B	B	B	B	B	A	-	-	B	A	B	-	B	B	B	-	-	B
Ps131129	3.6	12.3	Ps100872	Ps000201	Ps100872	Ps000228	0.0307536	B	A	-	B	B	-	A	A	A	B	A	B	B	B	A	-	B	B	B	B	A	B	A	-	B	B	B	B	B	A	A	B	B	A	B	A	B	B	B	B	-	B
Ps104375	3.6	13.2	Ps000201	Ps000228	Ps100872	Ps000228	0.0112701	B	A	B	-	B	B	A	-	A	B	A	B	B	B	A	A	B	B	B	B	A	B	A	B	B	B	B	B	B	A	A	B	B	A	B	A	B	B	B	B	B	B
Ps161480	3.6	11.1	Ps100872	Ps000201	Ps100872	Ps000228	0.070546	B	A	B	B	B	B	A	A	-	B	A	-	-	B	A	-	B	B	B	B	A	B	A	-	B	B	B	B	-	A	A	B	-	A	B	A	-	-	-	B	B	B
Ps145258	3.6	11.7	Ps100872	Ps000201	Ps100872	Ps000228	0.00442653	B	A	B	B	B	B	A	A	A	B	A	B	B	B	-	A	B	B	-	B	A	-	A	B	B	-	B	B	-	-	-	B	B	A	B	-	B	B	B	B	B	B
Ps144478	3.6	12	Ps100872	Ps000201	Ps100872	Ps000228	0.0858128	B	A	B	B	B	-	A	A	A	B	A	-	B	B	A	A	B	B	B	B	A	B	A	B	-	-	B	-	-	A	A	B	B	A	B	A	B	B	B	-	B	B
Ps103557	3.6	13.2	Ps100872	Ps000201	Ps100872	Ps000228	0.0253473	B	A	B	B	B	-	A	A	A	B	A	B	B	B	A	A	B	B	B	B	A	B	A	B	B	B	B	B	-	A	A	B	B	A	B	A	B	B	B	B	B	-
Ps106289	3.6	13.2	Ps100872	Ps000201	Ps100872	Ps000228	0.0253473	B	A	B	B	B	B	A	A	A	B	A	B	B	B	A	A	B	-	B	B	A	B	A	B	B	B	B	B	B	A	A	B	B	A	B	A	B	B	B	B	B	-
Ps112722	3.6	12.9	Ps100872	Ps000201	Ps100872	Ps000228	0.0158613	B	A	B	B	B	B	A	A	A	B	A	B	B	B	A	-	B	B	-	B	A	B	A	B	B	B	-	B	B	A	A	-	B	A	B	A	B	B	B	B	B	B
Ps137604	3.6	12	Ps100872	Ps000201	Ps100872	Ps000228	0.0191496	B	A	B	B	B	B	A	A	A	-	A	B	B	-	A	-	B	B	B	B	A	B	A	B	B	B	B	B	-	A	A	B	B	-	-	A	B	-	B	B	B	B
Ps109203	3.6	12.9	Ps000201	Ps000228	Ps100872	Ps000228	0.0348085	B	A	B	-	B	B	A	A	A	B	A	B	B	B	A	A	-	B	B	B	A	-	A	B	B	B	B	B	B	A	A	B	B	A	B	A	-	B	B	B	B	B
Ps152383	3.6	11.4	Ps100872	Ps000201	Ps100872	Ps000228	0.037373	B	A	B	B	B	B	A	A	A	B	-	B	B	B	A	A	-	B	B	B	A	B	A	B	B	B	B	-	-	A	A	B	-	-	B	A	B	B	-	B	B	B
Ps155009	3.6	11.4	Ps100872	Ps000201	Ps100872	Ps000228	0.0781691	B	A	-	B	B	B	A	A	A	-	A	-	B	B	A	A	B	-	B	B	-	B	A	B	B	B	B	-	B	A	A	B	-	A	B	A	B	B	B	B	B	B
Ps113484	3.6	12.9	Ps100872	Ps000201	Ps100872	Ps000228	0.00256883	B	-	B	B	B	B	A	-	A	B	A	B	B	B	A	A	B	B	B	B	-	-	A	B	B	B	B	B	B	A	A	B	B	A	B	A	B	B	B	B	B	B
Ps155379	3.6	11.4	Ps100872	Ps000201	Ps100872	Ps000228	0.0163092	B	A	-	B	B	B	A	A	-	B	A	-	A	B	A	A	B	B	B	B	A	B	A	B	B	B	B	B	B	-	A	-	-	-	B	-	B	B	B	B	B	B
Ps155284	3.6	11.4	Ps100872	Ps000201	Ps100872	Ps000228	0.0163092	-	A	B	B	B	-	-	A	A	B	A	-	B	B	A	-	B	B	B	B	A	-	A	B	B	B	B	B	B	A	A	B	B	-	B	A	B	B	B	B	B	B
Ps104454	3.6	13.5	Ps100872	Ps000201	Ps100872	Ps000228	0.0253473	B	A	B	B	B	B	A	A	A	B	A	-	-	B	A	A	B	B	B	B	A	B	A	B	B	B	B	B	B	A	A	-	B	A	B	A	B	B	B	B	B	B
Ps107957	3.6	13.2	Ps100872	Ps000201	Ps100872	Ps000228	0.00665561	B	A	B	B	B	B	A	A	A	-	A	B	-	B	A	A	B	B	B	B	A	B	-	B	B	B	B	B	B	-	A	B	B	A	B	A	B	B	B	B	B	B
Ps148420	3.6	12	Ps100872	Ps000201	Ps100872	Ps000228	0.0268567	-	A	B	B	B	-	A	A	-	-	-	B	-	B	A	A	B	B	B	B	A	B	A	B	B	B	B	B	B	A	A	B	B	A	B	A	B	B	B	B	-	B
Ps115122	3.6	12.6	Ps100872	Ps000201	Ps100872	Ps000228	0.0221679	B	A	-	B	B	B	A	A	A	B	A	B	B	B	A	A	B	B	B	B	-	B	A	B	B	B	B	B	B	A	A	B	B	A	B	A	B	B	B	B	-	B
Ps144960	3.6	11.7	Ps100872	Ps000201	Ps100872	Ps000228	0.0268567	-	A	B	B	B	-	-	A	A	-	A	B	B	B	A	A	B	B	B	B	A	B	A	-	B	B	B	B	B	A	A	B	B	A	B	A	-	B	B	B	B	B
Ps118033	3.6	12.6	Ps100872	Ps000201	Ps100872	Ps000228	0.0221679	B	A	B	B	B	B	A	A	A	B	A	B	B	B	A	A	B	B	-	B	A	B	A	B	B	-	B	B	B	A	-	-	B	A	-	A	B	B	B	B	B	B
Ps138255	3.6	12	Ps100872	Ps000201	Ps100872	Ps000228	0.00300426	B	A	B	B	B	B	A	A	A	-	-	B	B	B	A	-	-	B	B	B	A	B	-	B	B	B	B	B	-	A	A	B	B	-	B	A	B	B	B	B	B	B
Ps100272	3.6	13.8	Ps100872	Ps000201	Ps100872	Ps000228	0.00558098	B	A	B	B	B	B	A	A	A	B	A	B	B	B	A	-	B	B	B	B	A	B	A	B	B	B	B	B	B	A	A	B	B	A	B	A	B	B	B	B	B	B
Ps116191	3.6	12.6	Ps100872	Ps000201	Ps100872	Ps000228	0.00952879	B	-	B	B	B	-	A	A	A	B	A	B	B	-	A	A	B	-	B	B	A	B	-	B	B	B	B	B	B	A	A	B	B	A	B	A	B	B	B	B	B	B
Ps146217	3.6	11.7	Ps000201	Ps000228	Ps100872	Ps000228	0.113846	B	A	B	-	B	-	A	A	A	B	A	B	B	-	A	A	B	B	B	B	A	B	A	B	-	B	B	B	B	A	A	B	B	A	B	A	B	-	B	B	-	B
Ps163113	3.6	10.5	Ps100872	Ps000201	Ps100872	Ps000228	0.182422	B	A	B	B	-	B	A	A	A	B	A	B	B	B	A	A	B	B	B	B	A	B	A	B	B	B	-	-	B	A	A	-	-	A	B	A	-	-	-	-	-	B
Ps120887	3.6	12.6	Ps100872	Ps000201	Ps100872	Ps000228	0.00952879	B	A	-	B	B	B	A	A	-	-	A	B	B	B	A	A	B	B	-	B	A	B	-	B	B	B	B	B	B	A	A	B	B	A	B	A	B	B	B	B	B	B
Ps146851	3.6	11.7	Ps000201	Ps000228	Ps100872	Ps000228	0.011412	B	A	B	-	B	-	-	A	A	B	-	B	B	B	A	-	B	B	B	B	A	B	A	B	B	B	B	B	-	A	A	B	B	A	-	A	B	B	-	B	B	B
Ps120013	3.6	12.6	Ps100872	Ps000201	Ps100872	Ps000228	0.00952879	B	A	-	B	B	-	A	A	A	B	A	B	B	-	A	A	B	B	B	B	-	B	A	B	B	B	B	B	B	A	A	B	B	A	B	A	B	B	B	B	B	B
Ps153281	3.6	11.4	Ps000201	Ps000228	Ps100872	Ps000228	0.0163092	B	A	B	-	B	B	-	A	A	-	A	B	B	B	A	A	B	-	B	B	A	B	A	B	B	B	-	B	B	-	A	B	B	-	-	A	B	B	B	B	B	B
Ps113775	3.6	12.9	Ps100872	Ps000201	Ps100872	Ps000228	0.00256883	B	A	B	B	B	B	A	-	A	B	A	B	B	B	-	A	B	B	B	B	A	B	A	B	B	B	-	B	B	-	A	B	B	A	B	A	B	B	B	B	B	B
Ps130171	3.6	12.3	Ps100872	Ps000201	Ps100872	Ps000228	0.0135547	B	A	B	B	B	B	A	A	A	-	A	B	B	B	A	A	B	B	B	B	A	B	A	B	B	B	B	B	B	A	-	B	B	A	-	A	B	B	-	B	B	B
Ps157792	3.6	11.4	Ps100872	Ps000201	Ps100872	Ps000260	0.00350048	B	A	B	-	B	B	A	A	A	B	-	B	-	B	-	A	B	B	B	-	A	B	-	B	B	B	B	B	-	A	A	B	B	-	B	A	-	B	B	B	B	B
Ps142692	3.6	12.3	Ps100872	Ps000201	Ps100872	Ps000228	0.0191496	-	A	B	B	B	-	A	A	A	B	A	B	-	B	-	A	B	-	B	B	A	B	A	B	B	B	B	B	-	A	-	B	B	A	B	A	B	B	B	B	B	B
Ps150270	3.6	12	Ps000201	Ps000228	Ps100872	Ps000228	0.0268567	B	A	B	-	B	B	-	A	A	B	A	B	-	B	A	A	B	B	B	B	A	B	-	B	-	B	B	B	B	A	A	-	B	A	B	A	B	-	-	B	B	B
Ps102701	3.6	13.2	Ps100872	Ps000201	Ps100872	Ps000228	0.0253473	B	A	B	B	B	-	A	A	A	B	A	B	B	B	A	A	B	-	B	B	A	B	A	B	B	B	B	B	B	A	A	B	B	A	B	A	B	B	B	B	B	B
Ps124807	3.6	12.3	Ps100872	Ps000201	Ps100872	Ps000228	0.0135547	-	A	B	B	B	-	A	A	A	B	A	-	B	B	A	A	B	B	B	B	A	B	A	B	B	B	B	B	B	A	A	B	B	A	-	-	B	B	B	B	B	B
Ps110319	3.6	13.2	Ps100872	Ps000201	Ps100872	Ps000228	0.00665561	B	A	B	B	B	B	A	A	A	B	A	B	-	B	A	A	B	B	B	B	A	B	-	B	B	B	-	B	B	A	A	B	B	-	B	A	B	B	B	B	B	B
Ps151989	3.6	12	Ps100872	Ps000201	Ps100872	Ps000228	0.011412	B	-	B	B	B	B	A	A	A	B	A	-	-	-	A	A	B	B	B	B	A	B	-	B	B	B	B	-	B	A	A	B	B	-	B	A	B	B	B	B	-	B
Ps106451	3.6	13.2	Ps100872	Ps000201	Ps100872	Ps000228	0.0253473	B	A	B	B	B	B	A	A	A	B	A	B	B	-	A	A	-	B	B	B	A	B	A	B	B	B	-	B	B	A	A	B	B	A	B	A	B	B	B	B	B	B
Ps157572	3.6	11.1	Ps100872	Ps000201	Ps100872	Ps000228	0.00350048	B	-	B	B	B	B	A	A	A	B	A	-	B	B	A	-	B	B	B	B	A	B	A	-	-	B	B	B	B	-	-	B	-	-	B	A	B	B	-	B	B	B
Ps108389	3.6	12.9	Ps100872	Ps000201	Ps100872	Ps000228	0.0158613	B	-	-	B	B	B	A	A	A	B	A	B	B	B	A	A	B	B	B	B	A	B	A	B	B	B	B	B	-	A	A	-	B	A	B	A	B	B	B	B	B	B
Ps105614	3.6	13.2	Ps100872	Ps000201	Ps100872	Ps000228	0.0112701	B	A	B	B	B	B	A	A	A	B	A	-	B	B	A	A	B	B	B	B	A	-	-	B	B	B	B	B	B	A	A	B	B	A	B	A	B	B	B	B	B	B
Ps152346	3.6	11.4	Ps100872	Ps000201	Ps100872	Ps000228	0.00648531	B	A	B	B	B	-	A	A	A	B	-	B	B	B	-	A	B	B	B	B	A	B	-	B	B	B	B	B	B	A	A	B	-	-	B	A	B	B	B	-	-	B
Ps163099	3.6	10.5	Ps100872	Ps000201	Ps100872	Ps000228	0.00766076	-	A	B	B	B	-	A	-	A	B	-	-	B	B	A	-	B	-	B	B	A	B	-	B	B	B	B	B	B	A	-	B	B	A	B	A	-	B	B	-	B	B
Ps158439	3.6	11.1	Ps000201	Ps000228	Ps100872	Ps000228	0.00350048	B	-	B	B	B	B	A	A	A	B	-	B	B	B	-	-	B	B	B	-	A	B	A	B	B	B	-	B	B	-	A	B	-	A	B	A	B	B	B	B	-	B
Ps111959	3.6	12.9	Ps100872	Ps000201	Ps100872	Ps000228	0.0348085	B	A	-	B	B	B	A	A	A	-	A	B	B	B	A	A	B	B	B	B	A	B	A	B	B	B	B	B	B	A	A	B	B	A	-	A	B	B	B	-	B	B
Ps110504	3.6	12.9	Ps100872	Ps000201	Ps100872	Ps000228	0.0158613	B	A	B	B	B	-	A	A	A	B	-	B	B	B	A	A	B	B	-	B	A	B	A	B	B	B	B	B	B	A	A	B	B	A	B	A	-	B	B	B	B	B
Ps155669	3.6	11.4	Ps100872	Ps000201	Ps100872	Ps000228	0.037373	B	A	B	B	-	-	A	A	A	B	A	B	B	B	A	A	B	B	B	B	A	B	-	B	-	B	B	B	-	A	A	B	B	A	-	A	B	B	-	B	B	B
Ps151247	3.6	11.7	Ps000201	Ps000228	NA	Ps000228	0.113846	B	A	-	B	B	-	A	A	A	B	A	B	B	B	A	A	B	B	B	B	A	B	A	B	B	B	B	B	B	A	A	-	-	A	B	A	B	-	B	-	B	-
Ps100518	3.6	13.8	Ps100872	Ps000201	Ps100872	Ps000228	0.0131491	B	A	B	B	B	-	A	A	A	B	A	B	B	B	A	A	B	B	B	B	A	B	A	B	B	B	B	B	B	A	A	B	B	A	B	A	B	B	B	B	B	B
Ps130304	4.3	10.3	Ps000201	Ps000228	Ps100872	Ps000228	0.0307536	B	A	B	A	B	B	A	A	A	B	A	B	B	B	A	A	B	-	B	B	-	B	A	B	B	B	B	B	B	A	A	B	-	A	B	A	B	B	B	B	-	-
Ps129867	4.3	10.6	Ps000201	Ps000228	Ps000201	Ps000228	0.0640775	B	A	B	A	B	-	A	A	A	-	A	B	-	B	A	A	-	B	B	B	A	B	A	B	B	B	B	B	B	A	A	B	B	A	B	A	B	B	B	B	B	B
Ps119820	4.3	10.6	Ps000201	Ps000228	Ps000201	Ps000228	0.0221679	B	A	B	A	B	B	-	A	A	B	A	B	B	B	A	A	B	B	B	B	A	B	A	B	B	-	B	B	B	-	A	B	B	A	B	A	B	B	B	B	B	B
Ps115955	4.3	10.9	Ps000201	Ps000228	Ps100872	Ps000228	0.0221679	B	A	-	A	B	B	A	A	A	B	A	B	-	B	A	A	B	B	B	B	A	B	-	B	B	B	B	B	B	A	-	B	-	A	B	A	B	B	B	B	B	B
Ps110521	4.3	10.9	Ps000201	Ps000228	Ps000201	Ps000228	0.0348085	-	A	B	A	B	B	A	A	A	B	A	B	B	B	A	A	B	-	B	B	A	B	-	B	B	B	B	B	-	A	A	B	B	A	B	A	B	B	B	B	B	B
Ps125686	4.3	10.3	Ps000201	Ps000228	Ps000201	Ps000228	0.0307536	B	A	B	A	B	B	A	A	A	B	A	B	B	B	A	A	B	B	B	B	A	-	A	B	B	B	B	B	B	-	A	B	B	A	B	A	-	B	-	B	B	B
Ps149590	4.3	9.7	Ps000201	Ps000228	Ps000201	Ps000228	0.0268567	B	A	B	A	B	-	-	-	-	-	A	B	B	B	A	A	B	B	B	B	A	B	A	B	B	B	B	-	B	A	A	-	B	A	B	A	B	B	B	B	B	B
Ps111070	4.3	11.2	Ps000201	Ps000228	Ps000201	Ps000228	0.0704404	B	A	B	A	B	-	A	A	A	B	A	B	-	B	A	A	B	B	B	B	A	B	A	B	-	B	B	B	B	A	A	B	B	A	B	A	B	B	B	B	-	B
Ps146976	4.3	10	Ps000201	Ps000228	Ps000201	Ps000228	0.0268567	B	A	B	A	B	-	A	A	A	B	-	B	-	B	A	A	B	B	-	B	A	B	-	B	B	B	B	B	B	-	A	B	B	A	B	A	B	B	B	-	B	B
Ps156922	4.3	9.4	Ps000201	Ps000228	Ps000201	Ps000228	0.0163092	B	A	B	A	B	B	A	A	A	B	-	B	B	-	-	A	B	B	B	B	A	B	-	B	B	B	B	-	B	A	A	B	B	-	B	A	B	B	-	-	B	B
Ps142608	4.3	10.3	Ps000201	Ps000228	Ps000201	Ps000228	0.0423302	B	A	B	A	B	-	A	A	A	B	A	B	-	B	A	A	B	B	B	B	A	B	-	B	-	B	-	B	B	A	-	B	B	A	B	A	B	B	-	B	B	B
Ps105133	4.3	11.2	Ps000201	Ps000228	Ps100872	Ps000228	0.0526323	B	A	B	A	B	B	A	A	A	B	A	B	B	B	A	A	B	B	B	B	A	B	A	B	B	B	-	B	B	A	A	B	B	A	B	A	B	-	B	B	B	B
Ps108355	4.3	9.4	Ps000201	Ps000228	Ps100872	Ps000228	0.0704404	B	A	B	A	B	A	-	A	A	B	A	-	B	-	A	A	B	B	B	B	A	B	A	B	B	B	B	B	B	A	A	B	B	A	B	A	B	B	B	B	B	B
Ps103573	4.3	11.5	Ps000201	Ps000228	Ps000201	Ps000228	0.0112701	B	A	B	A	B	B	A	A	-	B	A	B	-	B	A	A	B	B	B	B	A	B	A	B	B	B	B	B	B	A	-	B	B	A	B	A	B	B	B	B	B	B
Ps128783	4.3	10.6	Ps000201	Ps000228	Ps100872	Ps000228	0.0307536	B	A	-	A	-	-	A	A	A	B	A	B	-	B	A	A	B	B	B	B	A	B	-	B	B	B	B	B	B	A	A	B	B	A	B	-	B	B	B	B	B	B
Ps161101	4.3	8.9	Ps000201	Ps000228	Ps000201	Ps000228	0.00519346	B	-	B	A	B	-	-	A	-	B	A	-	B	B	-	A	B	B	B	B	A	B	A	B	-	B	B	B	B	A	-	B	B	A	-	-	B	B	B	-	B	B
Ps126460	4.3	10.3	Ps000201	Ps000228	Ps000201	Ps000228	0.0135547	B	A	B	A	B	B	-	A	-	B	A	B	B	-	A	-	B	B	B	B	A	B	A	B	B	B	B	B	B	A	A	B	B	A	B	A	B	B	-	-	B	B
Ps162095	4.3	8.9	Ps000201	Ps000228	Ps000201	Ps000228	0.0325828	B	-	B	A	B	B	A	-	A	B	A	-	B	B	A	A	B	B	B	B	A	B	-	B	B	B	B	B	B	A	-	-	B	A	B	A	-	B	-	B	B	B
Ps132880	4.3	10.3	Ps000201	Ps000228	Ps100872	Ps000228	0.0307536	B	A	B	A	B	B	A	A	A	-	A	B	B	B	A	A	-	B	B	B	A	B	-	B	B	B	B	B	B	A	A	B	B	A	B	A	B	B	B	-	B	-
Ps139770	4.3	10	Ps000201	Ps000228	Ps100872	Ps000228	0.0858128	B	A	-	A	B	-	A	A	A	B	A	B	B	-	A	A	B	B	B	B	A	B	A	B	B	B	B	B	B	A	-	B	B	A	-	A	B	B	B	B	B	B
Ps130322	4.3	10.6	Ps000201	Ps000228	Ps100872	Ps000228	0.0640775	B	A	B	A	B	B	A	A	A	B	A	B	-	B	A	A	B	B	B	B	A	-	A	B	B	B	B	B	B	-	A	B	B	A	-	A	B	B	B	B	B	-
Ps100599	4.3	11.8	Ps000201	Ps000228	Ps000201	Ps000228	0.0286714	B	A	B	A	B	B	A	A	A	B	A	B	B	B	A	A	B	B	B	B	A	B	A	B	B	B	B	B	-	A	A	B	B	A	B	A	B	B	B	B	B	B
Ps146302	4.3	9.7	Ps000201	Ps000228	Ps000201	Ps000228	0.011412	B	A	B	A	B	-	A	A	A	B	-	B	B	B	A	-	B	B	B	B	A	B	-	B	B	B	B	B	B	-	A	B	B	A	B	A	B	B	-	B	-	B
Ps115736	4.3	10.6	Ps000201	Ps000228	Ps000201	Ps000228	0.0221679	B	A	B	A	B	-	A	A	A	B	A	B	B	-	A	A	B	B	B	B	A	B	A	B	B	B	B	B	B	A	A	B	-	A	B	-	B	B	B	B	B	B
Ps122441	4.3	10.6	Ps000201	Ps000228	Ps000201	Ps000228	0.0221679	B	A	B	A	B	B	A	A	A	B	A	B	B	B	-	A	B	B	-	B	A	B	A	B	B	B	B	B	-	A	-	B	B	A	B	A	B	B	B	B	B	B
Ps125243	4.3	10.3	Ps000201	Ps000228	Ps100872	Ps000228	0.0307536	B	A	B	A	B	B	A	A	-	B	A	B	B	-	A	A	B	B	B	B	A	B	A	B	B	B	B	B	-	A	A	B	B	A	B	A	B	B	B	B	B	-
Ps108722	4.3	10.9	Ps000201	Ps000228	Ps000201	Ps000228	0.0348085	B	A	B	A	B	-	A	A	A	B	A	B	B	B	A	-	B	B	B	B	A	B	A	-	B	-	B	B	B	A	A	B	B	A	B	A	B	B	B	B	B	B
Ps162424	4.3	8.9	Ps000201	Ps000228	Ps000201	Ps000228	0.0196307	B	A	B	A	B	-	A	A	A	B	-	-	-	B	-	-	B	B	-	B	A	B	A	B	B	B	B	-	B	A	A	B	-	-	B	-	B	B	B	-	B	B
Ps159439	4.3	9.4	Ps000201	Ps000228	Ps100872	Ps000228	0.194366	B	A	B	A	-	B	A	A	A	-	A	B	-	B	A	A	B	-	B	B	A	B	A	B	B	B	B	B	B	A	-	-	B	A	B	A	-	-	B	-	B	-
Ps108969	4.3	10.9	Ps000201	Ps000228	Ps000201	Ps000228	0.0348085	B	A	B	A	B	-	A	A	A	B	A	B	B	B	A	A	B	B	B	B	A	B	-	B	B	B	B	-	B	A	A	B	B	A	B	A	B	B	B	B	B	B
Ps125604	4.3	10.6	Ps000201	Ps000228	Ps000201	Ps000228	0.0307536	B	A	B	A	B	-	A	A	-	B	A	B	-	B	A	A	B	B	B	B	A	-	A	B	B	B	B	B	B	-	A	B	B	A	B	A	B	B	-	B	B	B
Ps151854	4.3	9.7	Ps000201	Ps000228	Ps000201	Ps000228	0.0268567	B	A	B	A	B	B	A	A	-	B	A	B	B	B	A	-	B	-	-	B	A	B	-	B	B	B	B	-	B	A	A	B	B	A	B	A	B	B	B	-	B	B
Ps145779	4.3	9.7	Ps000201	Ps000228	Ps000201	Ps000228	0.113846	B	A	B	A	B	-	A	-	A	-	A	B	B	B	A	A	-	B	-	B	A	B	A	B	B	B	B	B	-	A	A	B	B	A	B	A	B	B	B	B	-	B
Ps133298	4.3	10.3	Ps000201	Ps000228	Ps000201	Ps000228	0.0307536	-	A	B	A	B	-	A	A	A	B	A	B	B	B	A	-	-	B	B	B	A	B	A	B	B	B	B	B	B	A	A	B	B	A	-	A	B	B	B	B	B	B
Ps135614	4.3	10	Ps000201	Ps000228	Ps000201	Ps000228	0.0191496	-	-	B	A	B	-	A	A	A	-	A	B	B	B	A	A	-	B	B	B	A	B	-	B	B	B	B	B	B	A	A	B	B	A	B	-	B	B	B	B	B	B
Ps117034	4.3	10.6	Ps000201	Ps000228	Ps000201	Ps000228	0.0221679	B	A	B	A	B	B	A	A	-	B	-	B	B	-	A	A	B	B	B	B	A	B	A	B	B	B	B	B	B	A	A	B	B	A	B	A	B	B	-	-	B	B
Ps113093	4.3	10.9	Ps000201	Ps000228	Ps000201	Ps000228	0.0704404	B	A	B	A	B	B	A	A	A	B	A	-	B	B	A	A	B	B	-	B	A	B	A	B	B	B	B	B	B	A	A	-	B	A	B	A	-	B	B	B	B	B
Ps101164	4.3	11.5	Ps000201	Ps000228	Ps000201	Ps000228	0.039	B	A	B	A	B	-	A	A	A	B	A	B	B	B	A	A	B	B	B	B	A	B	A	B	B	B	B	B	B	A	A	B	B	A	B	A	B	B	B	-	B	B
Ps128509	4.3	10.3	Ps000201	Ps000228	Ps000201	Ps000228	0.0307536	B	A	B	A	B	-	A	A	A	B	-	B	B	B	A	A	B	B	-	B	A	B	A	B	B	B	-	B	B	A	A	B	B	A	B	-	B	B	B	-	B	B
Ps154423	4.3	9.4	Ps000201	Ps000228	Ps000201	Ps000228	0.037373	B	-	B	A	B	B	A	A	A	B	A	B	B	B	-	A	B	B	B	B	A	B	A	B	B	-	-	-	-	-	A	B	B	A	B	A	B	B	B	-	B	B
Ps106014	4.3	11.2	Ps000201	Ps000228	Ps000201	Ps000228	0.0253473	B	A	B	A	B	B	A	A	A	B	A	-	B	B	A	A	B	B	B	B	-	B	A	B	B	B	B	B	B	A	A	B	B	A	B	A	B	B	B	B	B	B
Ps124385	4.3	10.3	Ps000201	Ps000228	Ps000201	Ps000228	0.0640775	B	A	B	A	B	-	A	A	A	B	A	B	B	B	-	A	B	-	B	B	A	B	A	B	B	B	B	B	B	A	A	B	B	A	-	A	B	B	-	B	B	B
Ps108674	4.3	9.4	Ps000201	Ps000228	Ps100872	Ps000228	0.0704404	B	A	B	A	B	A	A	A	A	B	A	B	B	B	A	A	-	B	B	B	A	B	A	B	B	B	B	B	-	-	A	B	B	A	-	A	B	B	B	B	B	B
Ps106869	4.3	10.9	Ps000201	Ps000228	Ps000201	Ps000228	0.0158613	B	A	B	A	B	B	A	A	A	-	A	B	B	B	A	A	B	B	B	B	A	B	A	B	B	-	B	B	B	-	-	B	B	A	B	A	B	B	B	B	B	B
Ps158249	4.3	9.1	Ps000201	Ps000228	Ps100872	Ps000228	0.104757	B	A	B	A	B	-	A	A	A	B	A	-	B	-	A	A	B	B	-	B	A	B	A	B	B	-	B	B	B	-	A	B	-	A	B	A	-	B	B	B	B	-
Ps117273	4.3	10.9	Ps000201	Ps000228	Ps000201	Ps000228	0.0221679	B	-	B	A	B	B	A	A	A	B	A	B	-	B	A	A	B	B	B	B	A	B	A	B	B	-	B	B	B	A	A	B	B	-	B	A	B	B	B	-	B	B
Ps114390	4.3	10.6	Ps000201	Ps000228	Ps000201	Ps000228	0.0474254	B	A	B	A	B	B	A	A	A	B	A	B	B	B	A	A	-	B	B	B	A	-	A	B	B	B	B	B	-	A	A	B	B	-	B	A	B	B	B	B	-	B
Ps118703	4.3	10.6	Ps000201	Ps000228	Ps000201	Ps000228	0.0474254	B	A	B	A	B	-	A	A	A	-	A	-	B	B	A	A	B	B	B	B	A	B	A	B	B	B	B	B	B	A	-	B	-	A	B	A	B	B	B	B	B	B
Ps000228	5.1						0.0579277	B	A	B	A	B	B	A	A	A	B	A	B	-	B	A	A	B	B	B	A	A	B	A	B	B	B	B	B	B	A	A	B	B	A	B	A	B	B	B	B	B	B
Ps138056	5.1	12	Ps000201	Ps000228	Ps000201	Ps900115	0.0858128	B	A	B	A	B	-	A	A	A	B	A	B	B	B	A	A	-	B	B	-	-	B	A	B	B	B	B	B	-	A	A	B	B	A	B	A	-	-	B	B	B	B
Ps114229	5.1	12.6	Ps000201	Ps000228	Ps000201	Ps000260	0.0474254	B	A	B	A	B	B	A	A	A	B	A	B	B	-	-	A	B	B	B	A	-	B	A	B	B	B	B	B	B	A	A	B	B	A	B	A	B	B	-	B	-	B
Ps112592	5.1	12.9	Ps000201	Ps000228	Ps000201	Ps900115	0.0348085	B	A	B	A	B	-	A	A	A	B	-	B	B	B	A	A	B	B	B	-	A	B	A	B	B	B	-	B	B	A	A	B	B	A	B	A	B	B	B	B	B	B
Ps112216	5.1	13.2	Ps000201	Ps000228	Ps000201	Ps000260	0.0704404	B	A	B	A	B	-	A	A	A	B	A	-	-	B	-	A	B	B	B	A	A	B	A	B	B	B	B	B	B	A	A	B	B	A	B	A	B	B	B	B	B	B
Ps114240	5.1	12.6	Ps000228	Ps900115	Ps000201	Ps900115	0.0934478	B	A	B	A	-	B	A	A	A	B	A	B	B	-	A	-	-	B	B	A	A	B	A	B	B	B	B	B	-	A	A	B	B	A	B	A	B	B	B	B	B	B
Ps115022	5.1	12.9	Ps000228	Ps900115	Ps000201	Ps900115	0.0934478	B	A	-	A	B	-	A	A	A	B	A	B	-	-	A	-	B	B	B	A	A	B	A	B	B	B	B	B	B	A	A	B	B	A	B	A	B	B	B	B	B	B
Ps159899	5.1	11.4	Ps000201	Ps000228	Ps000201	Ps000260	0.104757	-	A	B	A	-	B	A	A	A	-	A	B	-	B	-	A	B	B	B	A	A	B	A	B	B	B	B	B	-	A	A	B	B	-	B	-	B	B	B	B	B	B
Ps129729	5.1	12.3	Ps000228	Ps900115	Ps000201	Ps900115	0.0135547	B	-	B	A	B	B	A	A	A	B	A	B	B	B	A	-	B	B	B	A	A	B	A	B	B	B	-	B	B	A	-	B	B	-	B	A	B	B	B	B	B	B
Ps101367	5.1	13.5	Ps000228	Ps900115	Ps000201	Ps900115	0.0768432	B	A	B	A	B	B	A	A	A	B	A	B	B	B	A	A	B	B	B	A	A	-	A	B	B	B	B	-	B	A	A	B	B	A	B	A	B	B	B	B	B	B
Ps105769	5.1	13.2	Ps000228	Ps900115	Ps000201	Ps900115	0.10105	B	A	B	A	B	B	A	A	A	B	A	B	B	B	A	A	B	B	-	A	A	B	A	B	B	B	-	-	B	A	A	B	B	A	B	A	B	B	B	B	B	B
Ps112054	5.1	12.9	Ps000228	Ps900115	Ps000201	Ps900115	0.131668	B	A	B	A	B	-	A	A	A	B	A	B	B	-	A	A	B	B	B	A	A	B	A	B	B	B	B	B	B	A	A	B	B	A	B	A	B	-	B	-	B	B
Ps122769	5.1	12.9	Ps000228	Ps900115	Ps000201	Ps900115	0.0221679	B	A	B	A	B	B	A	A	A	B	A	B	-	B	A	A	B	B	B	A	-	B	A	B	B	B	B	B	B	A	A	B	B	A	B	-	B	B	B	B	B	B
Ps156031	5.1	11.7	Ps000228	Ps900115	Ps000201	Ps900115	0.149541	-	A	B	A	B	B	A	A	A	B	-	B	-	B	A	A	B	B	B	A	A	B	A	-	B	B	B	B	B	-	A	B	-	A	B	A	B	B	-	-	B	B
Ps140743	5.1	12	Ps000228	Ps900115	Ps000201	Ps900115	0.0423302	B	A	B	A	-	-	A	A	A	-	-	-	B	B	A	A	B	B	B	A	A	B	A	B	B	B	B	B	B	A	A	B	B	A	B	-	B	B	B	B	B	B
Ps135499	5.1	12	Ps000201	Ps000228	Ps000201	Ps000260	0.0423302	B	A	B	A	B	-	A	A	A	B	A	B	B	-	-	A	B	B	-	A	A	B	A	B	B	B	B	-	B	A	-	B	B	A	B	A	B	B	B	B	B	B
Ps124345	5.1	12.3	Ps000228	Ps900115	Ps000201	Ps900115	0.0135547	B	A	-	A	B	B	-	A	A	B	A	-	B	B	A	A	B	B	B	-	A	B	A	B	B	B	B	B	B	A	-	B	B	A	B	A	B	B	B	B	B	B
Ps160989	5.1	10.8	Ps000228	Ps900115	Ps000201	Ps900115	0.249817	B	A	B	A	B	-	A	A	-	B	A	B	B	B	A	A	-	B	B	A	-	B	A	-	B	B	-	-	B	A	A	B	B	A	B	A	-	B	-	B	-	B
Ps114924	5.1	12.6	Ps000201	Ps000228	Ps000201	Ps000260	0.0221679	B	A	B	A	B	B	A	A	A	B	A	B	B	B	-	A	B	B	B	-	A	B	A	B	B	-	B	B	B	A	A	-	B	-	B	A	B	B	B	B	B	B
Ps156332	5.1	11.4	Ps000228	Ps900115	Ps000201	Ps900115	0.149541	B	-	B	A	B	B	A	A	A	B	A	-	B	B	A	A	-	-	-	A	A	B	A	B	B	B	B	B	B	A	A	-	B	A	B	A	B	B	-	B	B	B
Ps154823	5.1	11.4	Ps000228	Ps900115	Ps000201	Ps900115	0.0781691	-	A	B	A	B	B	A	A	A	B	-	B	B	B	A	-	B	B	B	A	A	B	A	-	-	B	B	B	B	-	A	B	B	A	-	A	-	B	B	B	-	B
Ps135132	5.1	12	Ps000228	Ps900115	Ps000201	Ps900115	0.274299	B	A	B	A	B	B	A	A	A	B	A	-	B	-	A	A	B	B	B	A	A	B	A	-	-	B	B	B	B	A	A	B	B	A	B	A	-	B	B	B	B	B
Ps124363	5.1	12.3	Ps000228	Ps900115	Ps000201	Ps900115	0.0640775	B	A	B	A	-	B	-	A	A	B	A	-	B	B	A	A	B	B	B	A	A	B	A	B	B	B	B	B	B	A	A	B	-	A	B	A	B	B	B	B	-	B
Ps121695	5.1	12.6	Ps000228	Ps900115	Ps000201	Ps900115	0.0474254	B	-	B	A	B	-	A	A	A	B	A	B	B	B	A	A	B	B	B	A	A	B	-	B	B	B	B	B	B	A	A	B	B	A	B	A	B	B	B	B	B	B
Ps107886	5.1	12.9	Ps000228	Ps900115	Ps000201	Ps900115	0.0348085	B	-	B	A	B	B	A	A	A	B	A	B	B	B	A	A	B	B	B	A	A	B	A	-	B	B	B	B	-	A	A	B	B	A	B	A	B	B	B	B	B	B
Ps151246	5.1	12	Ps000228	Ps900115	Ps000201	Ps900115	0.0577796	B	A	B	A	B	-	A	A	A	B	A	-	-	B	A	-	B	B	B	A	-	B	A	B	B	B	B	B	B	A	A	B	B	-	B	A	B	-	B	-	B	B
Ps152920	5.1	11.4	Ps000228	Ps900115	Ps000201	Ps900115	0.149541	B	A	B	A	B	-	A	A	A	B	A	B	B	B	A	A	B	-	B	A	-	B	A	B	-	B	-	B	-	A	A	B	B	A	B	A	-	-	B	B	B	B
Ps105306	5.1	13.2	Ps000201	Ps000228	Ps000201	Ps900115	0.0526323	B	A	B	-	B	-	A	A	A	B	A	B	B	B	A	A	B	B	B	A	A	B	A	B	B	B	B	B	B	A	A	B	B	A	B	A	-	B	B	B	B	B
Ps157592	5.1	11.1	Ps000201	Ps000228	Ps000201	Ps900115	0.0515759	B	A	B	A	B	B	A	A	-	-	A	B	B	B	A	A	-	B	B	-	A	B	A	B	B	B	B	B	-	A	-	B	B	A	B	-	B	B	-	B	B	B
Ps138562	5.1	12.3	Ps000228	Ps900115	Ps000201	Ps900115	0.159854	B	A	B	A	-	B	A	A	A	B	A	B	-	B	A	A	B	B	B	A	A	B	-	B	-	B	B	B	-	A	A	B	B	A	B	A	B	B	B	-	B	B
Ps146636	5.1	11.7	Ps000201	Ps000228	Ps000201	Ps900115	0.0577796	-	A	B	A	B	-	A	A	A	B	A	B	B	B	A	-	-	B	B	-	A	-	A	B	B	B	B	B	B	A	-	B	-	A	B	A	B	B	B	B	B	B
Ps163390	5.1	10.5	Ps000228	Ps900115	Ps100872	Ps900115	0.0629791	-	A	B	-	B	-	A	A	A	B	A	B	-	B	A	A	B	B	-	-	A	B	A	B	-	B	B	B	-	A	-	B	B	A	-	-	B	B	B	B	B	B
Ps106608	5.1	13.2	Ps000228	Ps900115	Ps000201	Ps900115	0.0253473	B	-	B	A	B	B	A	A	A	B	A	B	B	B	A	A	B	B	-	A	A	B	A	B	B	B	B	B	B	A	A	B	B	-	B	A	B	B	B	B	B	B
Ps100717	5.1	13.5	Ps000228	Ps900115	Ps000201	Ps900115	0.0768432	B	A	B	A	B	B	A	A	A	B	A	-	B	B	A	A	B	B	B	A	A	B	A	B	B	B	B	B	B	A	A	B	-	A	B	A	B	B	B	B	B	B
Ps125562	5.1	12.3	Ps000201	Ps000228	Ps000201	Ps900115	0.0307536	B	A	B	-	B	B	A	A	A	-	A	B	B	B	A	A	B	B	B	A	A	B	A	B	B	B	B	B	B	-	-	B	-	A	B	A	B	B	B	B	B	B
Ps147722	5.1	11.7	Ps000201	Ps000228	Ps000201	Ps900115	0.113846	B	A	B	-	B	B	A	A	A	B	A	B	B	B	A	A	-	B	B	A	A	B	A	-	B	B	B	B	-	A	A	B	-	A	B	-	-	B	-	B	B	B
Ps157603	5.1	11.1	Ps000201	Ps000228	Ps000201	Ps900115	0.0231409	B	A	B	A	B	-	A	A	A	B	A	B	B	B	A	A	-	-	-	-	A	B	-	B	B	B	-	B	B	A	A	B	B	-	B	-	B	B	B	B	B	B
Ps162776	5.1	10.8	Ps000201	Ps000228	Ps000201	Ps000260	0.0196307	B	A	B	A	B	B	A	-	A	B	-	B	-	-	-	A	B	B	B	A	A	-	A	B	B	B	B	B	-	A	-	B	B	-	B	-	B	B	-	B	B	B
Ps145121	5.1	11.7	Ps000201	Ps000228	Ps000201	Ps900115	0.0577796	-	-	B	A	B	-	A	A	A	-	A	B	B	B	A	A	-	B	B	-	A	B	A	B	B	B	B	B	B	A	A	B	B	A	B	A	-	B	B	B	B	B
Ps138113	5.1	12.3	Ps000228	Ps900115	Ps000201	Ps900115	0.0858128	B	A	B	A	B	B	A	A	A	B	A	B	-	B	A	A	B	B	B	A	A	B	-	-	B	B	B	B	-	A	A	B	B	A	B	-	-	-	B	B	B	B
Ps142425	5.1	12.3	Ps000228	Ps900115	Ps000201	Ps900115	0.0191496	B	A	B	A	B	-	A	A	-	B	-	B	-	B	A	A	B	B	-	A	-	B	A	B	B	B	B	B	B	A	A	B	B	A	B	A	B	B	B	B	B	B
Ps123805	5.1	12.6	Ps000228	Ps900115	Ps000201	Ps900115	0.0221679	B	A	B	A	B	B	-	-	A	B	A	B	B	B	A	A	B	B	B	A	A	-	-	B	B	B	B	B	B	A	A	B	B	A	-	A	B	B	B	B	B	B
Ps152474	5.1	11.4	Ps000228	Ps900115	Ps000201	Ps900115	0.149541	B	A	B	A	B	B	A	A	A	B	A	B	B	-	A	A	B	B	-	A	A	-	A	-	B	B	B	-	-	A	A	B	B	-	-	A	B	B	B	B	B	B
Ps139918	5.1	12	Ps000228	Ps900115	Ps000201	Ps900115	0.0858128	B	A	B	A	B	B	A	A	A	B	A	B	B	B	A	-	B	B	-	A	A	B	A	B	B	B	B	B	B	A	-	B	B	A	B	A	B	B	B	-	-	-
Ps109216	5.1	12.9	Ps000201	Ps000228	Ps000201	Ps000260	0.00665561	B	-	B	A	B	B	A	A	-	B	A	B	B	B	-	A	B	B	B	A	-	B	A	B	B	B	B	B	B	A	A	B	B	A	B	A	B	B	B	B	B	B
Ps102076	5.1	13.5	Ps000228	Ps900115	Ps000201	Ps900115	0.0768432	B	A	B	A	B	-	A	A	A	B	A	B	B	B	A	A	B	B	B	A	A	B	A	B	B	B	B	B	B	A	A	B	B	A	B	A	B	B	B	B	B	-
Ps163033	5.1	10.8	Ps000228	Ps900115	Ps000201	Ps900115	0.0955807	B	A	B	A	B	B	-	A	A	B	A	-	-	B	A	-	B	B	-	A	A	B	-	B	B	B	B	B	B	A	A	-	-	A	-	-	-	B	B	B	B	-
Ps145399	5.1	11.7	Ps000201	Ps000228	Ps000201	Ps000260	0.0577796	B	A	B	A	B	B	A	A	A	B	A	B	B	B	-	A	B	B	B	-	A	B	A	B	B	B	B	B	-	A	A	B	-	A	B	-	B	B	-	B	B	-
Ps163124	5.1	10.8	Ps000228	Ps900115	Ps000201	Ps900115	0.0955807	-	-	B	A	B	-	A	A	A	-	A	-	-	B	A	A	B	B	B	A	A	B	-	B	B	B	B	B	B	-	A	B	B	A	B	-	-	B	B	-	-	B
Ps101779	5.1	13.5	Ps000228	Ps900115	Ps000201	Ps900115	0.039	B	A	B	A	B	-	A	A	A	B	A	B	B	B	A	A	B	B	B	A	A	B	-	B	B	B	B	B	B	A	A	B	B	A	B	A	B	B	B	B	B	B
Ps115082	5.1	12.6	Ps000201	Ps000228	Ps000201	Ps900115	0.0221679	B	A	-	A	B	B	A	A	A	B	A	B	B	B	A	A	B	B	B	-	-	B	A	B	B	B	B	B	B	A	A	B	B	A	B	-	B	B	B	-	B	B
Ps152758	5.1	11.7	Ps000201	Ps000228	Ps000201	Ps000260	0.037373	B	A	B	A	B	B	A	A	A	B	-	B	-	B	-	A	B	B	B	A	-	B	A	B	-	-	B	B	B	A	A	B	B	-	B	A	-	B	B	B	-	B
Ps114127	5.1	12.6	Ps000228	Ps900115	Ps000201	Ps900115	0.169912	-	A	B	A	B	-	A	A	A	B	A	B	B	B	A	A	B	B	-	A	A	B	A	B	B	B	B	B	-	A	A	B	B	A	B	A	B	B	B	-	B	B
Ps147648	5.1	11.7	Ps000228	Ps900115	Ps000201	Ps900115	0.0577796	B	A	B	A	B	-	A	A	A	B	-	B	B	B	A	A	-	B	B	A	-	B	-	B	B	B	B	B	-	A	A	B	B	A	-	A	B	B	-	B	B	B
Ps118435	5.1	12.6	Ps000228	Ps900115	Ps000201	Ps900115	0.0934478	B	A	B	A	-	-	A	A	A	B	-	B	B	B	A	A	-	B	B	A	A	B	A	B	B	B	B	B	B	A	A	B	B	A	B	A	B	B	-	B	B	B
Ps161532	5.1	11.1	Ps000228	Ps900115	Ps000201	Ps900115	0.138982	B	A	-	A	-	B	A	A	A	B	A	B	-	B	A	A	B	B	B	A	-	-	-	B	B	-	B	-	-	A	A	B	B	-	B	A	-	B	B	B	B	B
Ps104134	5.1	13.2	Ps000228	Ps900115	Ps000201	Ps900115	0.0526323	B	A	B	A	B	B	A	A	A	B	A	B	B	B	A	A	B	B	B	A	A	B	A	-	B	B	B	B	B	A	A	B	B	-	B	A	B	B	B	B	-	B
Ps148884	5.1	11.7	Ps000228	Ps900115	Ps000201	Ps900115	0.205903	-	-	B	A	B	-	A	A	A	-	A	B	B	B	A	A	B	B	B	A	A	B	A	-	B	B	B	B	B	A	A	B	B	A	-	A	B	B	B	-	B	B
Ps115376	5.1	12.6	Ps000228	Ps900115	Ps000201	Ps900115	0.0474254	B	A	B	A	B	-	A	A	-	B	A	B	B	B	A	A	B	-	B	A	A	-	A	B	B	B	B	B	B	A	A	B	B	A	B	A	B	B	B	B	B	B
Ps138276	5.1	12	Ps000228	Ps900115	Ps000201	Ps900115	0.0191496	B	-	B	A	B	B	A	A	A	B	-	-	B	B	A	A	B	B	B	A	-	B	A	-	B	B	B	B	-	A	A	B	B	A	B	A	B	B	B	B	B	B
Ps105167	5.1	13.2	Ps000201	Ps000228	Ps000201	Ps000260	0.0526323	B	A	B	A	B	-	A	A	A	B	A	B	B	B	-	A	B	B	B	A	A	B	A	B	B	B	B	B	B	A	A	B	B	A	B	A	B	B	B	-	B	B
Ps161570	5.1	11.1	Ps000201	Ps000228	Ps000201	Ps000260	0.070546	B	A	B	A	B	-	A	A	A	B	A	B	-	-	-	A	B	B	B	-	A	B	A	B	-	B	B	B	B	-	A	B	B	A	-	-	B	B	-	B	B	B
Ps128807	5.1	12.3	Ps000228	Ps900115	Ps000201	Ps900115	0.0307536	B	A	B	A	B	B	A	A	A	B	A	B	B	-	A	-	B	-	B	A	-	B	A	B	B	B	B	B	B	-	A	B	B	A	B	A	B	B	-	B	B	B
Ps148076	5.1	11.7	Ps000228	Ps900115	Ps000201	Ps900115	0.0577796	B	A	B	A	B	-	A	-	-	B	A	B	B	B	A	A	-	B	B	A	A	B	A	B	B	B	B	B	B	A	A	B	B	-	B	A	B	-	-	B	-	B
Ps128246	5.1	12.6	Ps000228	Ps900115	Ps000201	Ps900115	0.0640775	B	A	B	A	B	B	A	A	A	B	A	B	-	B	A	A	B	B	B	A	-	B	A	B	B	B	B	B	B	A	-	B	B	A	B	A	B	B	-	-	-	B
Ps137894	5.1	12	Ps000228	Ps900115	Ps000201	Ps900115	0.0858128	B	A	B	A	B	-	A	A	A	B	A	B	B	B	A	-	B	B	B	A	A	B	A	B	-	B	B	B	-	A	A	B	B	A	B	-	B	B	B	B	B	B
Ps136533	5.1	12.3	Ps000228	Ps900115	Ps000201	Ps900115	0.0858128	B	A	B	A	B	-	A	-	A	B	A	B	-	-	A	A	B	B	-	A	A	-	A	B	B	B	B	B	B	A	A	B	B	A	B	A	B	B	B	B	B	B
Ps139134	5.1	12.3	Ps000201	Ps000228	Ps000201	Ps000260	0.0423302	B	A	B	-	B	B	A	A	A	B	A	-	-	B	-	A	B	B	B	A	A	B	-	B	-	B	B	B	B	A	A	B	B	A	B	A	B	B	B	B	-	B
Ps129745	5.1	12.3	Ps000228	Ps900115	Ps000201	Ps900115	0.122823	B	A	B	A	-	B	A	A	A	B	A	B	B	B	A	A	B	B	B	A	-	B	A	B	B	B	B	B	-	A	A	B	-	A	B	A	B	-	-	B	B	B
Ps118785	5.1	12.6	Ps000228	Ps900115	Ps000201	Ps900115	0.0934478	B	-	B	A	B	-	A	A	A	B	A	B	B	B	A	A	B	B	B	A	A	B	A	-	B	B	B	B	B	A	A	B	-	A	B	A	B	B	B	B	B	B
Ps137711	5.1	12	Ps000228	Ps900115	Ps000201	Ps900115	0.0191496	B	A	-	A	B	B	A	A	A	B	A	-	B	B	A	-	B	B	B	A	-	B	-	B	B	B	-	B	B	-	A	B	B	A	B	A	B	B	B	B	B	B
Ps136051	5.1	12.3	Ps000228	Ps900115	Ps000201	Ps900115	0.0191496	B	A	B	A	B	B	A	A	A	B	-	B	-	B	A	A	B	-	B	A	A	B	A	-	B	B	B	B	B	-	-	B	B	A	B	A	B	B	B	B	B	B
Ps108459	5.1	12.9	Ps000201	Ps000228	Ps000201	Ps900115	0.0704404	B	A	B	-	B	-	A	A	A	B	A	B	B	-	A	A	B	B	B	A	A	B	A	B	B	B	B	B	-	A	A	B	B	A	B	A	B	B	B	B	B	B
Ps154603	5.1	11.4	Ps000228	Ps900115	Ps000201	Ps900115	0.0781691	-	A	B	A	B	B	A	A	A	B	A	-	B	B	A	-	-	-	B	A	A	B	A	B	B	B	B	B	B	A	A	B	B	-	-	A	-	B	B	B	B	B
Ps125256	5.1	12.3	Ps000201	Ps000228	Ps000201	Ps900115	0.0307536	B	A	B	-	B	-	A	A	A	B	A	B	B	B	A	A	B	B	B	A	A	B	-	B	B	B	B	B	B	A	A	B	B	A	-	A	B	B	B	B	-	B
Ps126280	5.1	12.3	Ps000228	Ps900115	Ps000201	Ps900115	0.122823	B	A	-	A	-	-	A	A	A	B	-	B	B	B	A	A	B	B	B	A	A	B	A	-	B	B	B	B	B	A	A	B	B	A	B	A	B	B	B	B	B	B
Ps112019	5.1	12.9	Ps000228	Ps900115	Ps000201	Ps900115	0.131668	B	A	B	A	B	-	A	A	A	B	A	-	B	B	A	A	B	B	B	A	A	B	A	B	B	B	B	B	B	A	A	B	B	A	-	A	B	B	B	B	B	B
Ps143306	5.1	12	Ps000228	Ps900115	Ps000201	Ps900115	0.0858128	B	A	B	A	B	-	A	A	-	B	A	B	B	B	A	A	B	-	B	A	A	B	-	B	B	B	-	B	B	A	A	B	B	A	B	A	B	B	B	-	B	B
Ps162476	5.1	10.5	Ps000228	Ps900115	Ps000201	Ps900115	0.00766076	B	A	B	A	B	-	A	A	-	B	-	B	B	B	A	A	B	B	B	A	A	-	-	B	B	B	B	B	B	-	-	B	B	-	B	-	B	B	-	B	B	B
Ps104747	5.1	13.5	Ps000228	Ps900115	Ps000201	Ps900115	0.0526323	B	A	B	A	B	B	A	A	A	B	A	B	-	B	A	-	B	B	-	A	A	B	A	B	B	B	B	B	B	A	A	B	B	A	B	A	B	B	B	B	B	B
Ps106023	5.1	13.2	Ps000201	Ps000228	Ps000201	Ps000260	0.0526323	B	A	B	A	B	-	A	A	A	B	A	B	B	B	-	A	B	B	B	A	A	B	A	B	B	B	B	B	B	A	A	B	B	A	B	A	B	B	B	B	B	-
Ps118165	5.1	12.6	Ps000228	Ps900115	Ps000201	Ps900115	0.0474254	B	A	B	A	B	B	A	A	A	B	A	B	B	B	A	A	B	B	B	A	A	-	A	B	B	B	B	B	B	A	A	B	B	A	B	-	B	B	B	-	B	B
Ps141954	5.1	12	Ps000228	Ps900115	Ps000201	Ps900115	0.274299	-	A	-	A	B	B	A	A	A	B	A	B	B	B	A	A	B	B	B	A	A	B	A	B	B	B	-	B	-	A	A	B	B	A	B	A	B	B	B	-	B	B
Ps161053	5.1	10.8	Ps000228	Ps900115	Ps000201	Ps900115	0.070546	B	A	B	A	B	-	A	A	A	B	A	-	B	-	A	A	B	B	B	-	A	B	-	B	-	B	B	B	B	-	-	B	-	A	B	A	B	B	B	B	-	B
Ps125673	5.1	12.3	Ps000201	Ps000228	Ps000201	Ps900115	0.122823	-	A	-	A	B	B	A	A	A	-	A	B	B	B	A	A	-	B	B	-	A	B	A	-	B	B	B	B	B	A	A	B	B	A	B	A	B	B	B	B	B	B
Ps115225	5.1	12.6	Ps000228	Ps900115	Ps000201	Ps900115	0.0934478	B	A	B	A	B	B	A	A	A	B	A	B	B	B	A	A	B	B	B	A	A	B	A	-	B	B	B	B	B	-	A	B	-	A	B	A	B	B	B	B	-	B
Ps128139	5.1	12.6	Ps000228	Ps900115	Ps000201	Ps900115	0.0640775	B	A	B	A	B	-	A	A	-	B	A	-	-	B	A	A	B	B	B	A	A	B	A	B	B	B	B	B	-	A	-	B	B	A	B	A	B	B	B	B	B	B
Ps132223	5.1	12.3	Ps000228	Ps900115	Ps000201	Ps900115	0.122823	B	A	B	A	B	B	A	A	A	B	A	B	B	B	A	A	B	B	B	A	-	B	A	B	B	B	B	B	B	A	A	-	B	A	B	A	-	B	B	-	B	B
Ps144570	5.1	12	Ps000228	Ps900115	Ps000201	Ps900115	0.0191496	-	A	B	A	B	-	-	A	A	B	-	B	B	B	A	-	B	B	B	A	A	B	A	B	B	-	B	B	B	A	A	B	B	A	B	A	B	B	B	B	B	B
Ps125114	5.1	12.3	Ps000228	Ps900115	Ps000201	Ps900115	0.122823	-	A	-	A	-	-	A	A	A	B	A	B	B	B	A	A	B	B	B	A	A	B	A	B	B	B	B	B	B	A	A	B	B	-	B	A	B	B	-	B	B	B
Ps114992	5.1	12.6	Ps000201	Ps000228	Ps000201	Ps900115	0.0221679	-	A	B	A	B	B	A	A	A	B	A	B	B	B	A	A	B	B	B	-	A	B	A	B	B	B	B	-	B	A	A	B	B	A	B	-	B	B	B	B	B	B
Ps157771	5.1	11.1	Ps000228	Ps900115	Ps000201	Ps900115	0.104757	B	A	-	A	B	-	A	-	A	B	A	-	B	B	A	A	-	B	B	A	A	B	A	B	B	B	B	B	B	-	A	-	B	-	B	A	B	B	-	B	B	B
Ps142180	5.1	12.3	Ps000201	Ps000228	Ps000201	Ps000260	0.0423302	B	A	B	A	B	-	A	A	A	B	A	-	-	B	-	A	B	B	B	A	A	B	A	B	B	B	B	B	B	A	A	B	B	-	B	-	B	B	B	B	B	B
Ps132768	5.1	12.3	Ps000201	Ps000228	Ps000201	Ps000260	0.0640775	B	A	B	A	B	B	A	A	A	B	A	B	B	B	-	A	B	-	B	A	A	B	A	-	B	B	B	B	B	A	A	-	B	-	B	A	-	B	B	B	B	B
Ps125165	5.1	12.3	Ps000228	Ps900115	Ps000201	Ps900115	0.217044	B	A	-	A	B	B	A	A	A	-	A	B	B	B	A	A	-	B	B	A	A	B	A	B	B	B	B	B	B	A	A	-	B	A	B	A	-	B	B	B	B	B
Ps157850	5.1	11.1	Ps000201	Ps000228	Ps000201	Ps900115	0.104757	B	A	-	-	B	B	A	A	A	-	A	B	B	B	A	A	B	B	B	A	-	B	A	-	B	B	-	B	-	A	-	B	B	A	-	A	B	B	B	-	B	B
Ps159770	5.1	11.1	Ps000228	Ps900115	Ps000201	Ps900115	0.104757	B	-	B	A	-	-	A	A	A	B	-	-	B	B	A	A	B	B	B	A	A	B	A	B	B	-	B	B	B	A	A	-	B	A	B	A	-	B	-	B	B	B
Ps150944	5.1	12	Ps000228	Ps900115	Ps000201	Ps900115	0.0268567	B	A	B	A	B	B	-	A	-	B	-	B	-	B	A	A	B	B	B	A	A	B	A	-	B	B	B	B	B	A	A	B	B	A	B	A	B	B	B	B	B	-
Ps119444	5.1	12.6	Ps000228	Ps900115	Ps000201	Ps900115	0.0474254	B	A	B	A	B	B	A	A	A	B	A	B	B	B	A	-	-	B	B	A	A	-	A	B	B	B	B	B	B	A	-	B	B	A	B	A	B	B	B	B	B	B
Ps119637	5.1	12.9	Ps000228	Ps900115	Ps000201	Ps900115	0.0474254	B	A	B	A	B	B	A	A	A	B	A	B	-	B	A	A	B	B	B	A	A	B	-	B	B	B	B	B	B	A	A	B	B	A	-	A	B	B	-	B	B	B
Ps157192	5.1	11.1	Ps000201	Ps000228	Ps000201	Ps000260	0.0231409	B	A	B	-	B	B	A	A	A	-	A	B	B	-	-	A	-	B	B	A	-	B	A	B	B	B	B	B	B	A	A	B	B	A	-	-	B	B	B	B	B	-
Ps158033	5.1	11.1	Ps000228	Ps900115	Ps000201	Ps900115	0.0515759	-	A	B	A	B	-	A	A	A	B	-	-	B	B	A	A	B	B	B	A	A	-	-	B	B	B	B	B	B	A	A	B	B	-	B	-	B	B	-	B	-	B
Ps135423	5.1	12	Ps000228	Ps900115	Ps000201	Ps900115	0.0191496	B	A	B	A	B	B	A	A	A	B	A	B	B	B	A	A	B	B	-	A	A	B	-	B	B	B	B	B	B	A	-	B	B	-	B	-	-	B	B	B	-	B
Ps152562	5.1	11.4	Ps000228	Ps900115	Ps000201	Ps900115	0.0781691	B	A	B	A	-	-	A	A	A	B	A	B	B	B	A	A	B	B	B	A	A	B	A	B	B	B	B	B	-	-	A	B	B	A	B	-	-	B	-	B	-	B
Ps119161	5.1	12.6	Ps000228	Ps900115	Ps000201	Ps900115	0.169912	B	A	B	A	B	B	A	A	A	B	A	B	B	-	A	A	B	B	-	A	A	B	A	B	B	B	B	B	B	A	A	B	-	A	-	A	B	B	-	B	B	B
Ps136119	5.1	12	Ps000228	Ps900115	Ps000201	Ps900115	0.274299	B	A	B	A	B	B	A	A	A	B	A	-	B	B	A	A	B	B	B	A	A	-	A	B	-	B	B	B	B	A	A	B	B	A	B	A	B	B	-	B	-	-
Ps135305	5.1	12	Ps000228	Ps900115	Ps000201	Ps900115	0.0858128	B	A	B	A	B	B	A	A	A	B	A	B	B	B	A	A	B	B	B	A	A	B	A	-	B	B	B	B	B	-	A	B	B	-	B	A	B	-	-	B	B	B
Ps142842	5.1	12	Ps000201	Ps000228	Ps000201	Ps900115	0.0858128	B	A	B	A	B	B	A	A	A	B	A	B	B	B	A	A	B	B	B	-	-	-	A	-	B	B	B	B	B	A	A	B	B	A	B	A	B	B	-	B	B	B
Ps150709	5.1	12	Ps000228	Ps900115	Ps000201	Ps900115	0.0577796	B	A	B	A	B	B	A	A	-	B	A	B	-	-	A	A	B	B	B	A	-	B	A	B	B	B	B	-	B	A	A	B	B	A	B	-	-	B	B	B	B	B
Ps157617	5.1	11.4	Ps000228	Ps900115	Ps000201	Ps900115	0.194366	B	A	-	A	B	B	A	A	A	B	A	B	-	B	A	A	-	B	B	A	A	B	A	B	B	-	-	B	-	-	A	B	B	-	B	A	B	B	B	B	B	B
Ps134946	5.1	12.6	Ps000228	Ps900115	Ps000201	Ps900115	0.0307536	B	A	B	A	B	B	A	-	-	B	A	B	-	B	A	A	B	B	B	A	A	-	-	B	B	B	B	B	B	A	A	B	B	A	B	A	B	B	B	B	B	-
Ps137017	5.1	12	Ps000201	Ps000228	Ps000201	Ps000260	0.0423302	B	A	B	-	B	-	A	A	A	B	A	B	B	B	-	A	B	B	B	A	A	B	A	B	B	-	B	B	-	A	-	B	B	A	B	A	B	B	B	B	-	B
Ps135956	5.1	12	Ps000228	Ps900115	Ps000201	Ps900115	0.0423302	B	A	B	A	B	B	A	A	A	B	-	B	B	B	A	A	-	B	B	A	A	B	-	B	B	B	B	-	-	A	A	B	B	A	B	-	B	B	B	-	B	B
Ps147351	5.1	11.7	Ps000228	Ps900115	Ps000201	Ps900115	0.0268567	B	-	B	A	B	B	A	A	A	B	-	-	B	B	A	A	B	B	B	A	A	B	-	B	B	-	B	B	-	A	A	B	B	-	B	A	B	B	B	B	B	B
Ps144969	5.1	11.7	Ps000228	Ps900115	Ps000201	Ps900115	0.0268567	B	A	B	A	B	B	A	-	A	B	-	B	B	B	A	A	B	B	-	A	A	-	A	B	B	B	-	B	B	-	A	B	B	-	B	A	B	B	-	B	B	B
Ps103700	5.1	13.2	Ps000228	Ps900115	Ps000201	Ps900115	0.0526323	B	A	B	A	B	B	A	A	A	B	A	B	B	-	A	A	B	B	B	A	A	B	A	B	B	B	B	B	B	A	A	B	B	A	-	-	B	B	B	B	B	B
Ps103033	5.1	13.2	Ps000201	Ps000228	Ps000201	Ps000260	0.0526323	B	A	B	A	B	-	A	A	A	B	A	B	B	B	-	A	B	B	B	A	A	B	A	B	-	B	B	B	B	A	A	B	B	A	B	A	B	B	B	B	B	B
Ps162342	5.1	10.8	Ps000228	Ps900115	Ps000201	Ps900115	0.41108	B	A	B	A	B	-	A	A	-	-	A	-	B	-	A	A	B	B	B	A	A	B	A	-	-	B	B	B	-	A	A	B	B	A	-	A	B	B	B	B	B	-
Ps118300	5.1	12.6	Ps000228	Ps900115	Ps000201	Ps900115	0.169912	B	A	-	A	B	B	A	A	A	B	A	B	B	B	A	A	B	B	B	A	A	B	A	B	-	B	-	B	B	A	A	B	B	A	B	A	B	B	B	-	B	B
Ps138861	5.1	12	Ps000228	Ps900115	Ps000201	Ps900115	0.274299	B	A	B	A	B	-	A	A	A	B	A	B	B	B	A	A	B	B	B	A	A	B	A	B	B	B	B	-	-	A	A	-	B	A	-	A	B	B	B	B	-	B
Ps150736	5.1	11.7	Ps000201	Ps000228	Ps000201	Ps900115	0.0577796	-	A	-	-	B	B	A	A	A	-	A	B	B	B	A	A	B	B	-	A	A	B	A	B	-	B	B	B	B	A	A	B	B	-	B	-	B	B	B	B	B	B
Ps146436	5.1	11.7	Ps000201	Ps000228	Ps000201	Ps000260	0.113846	B	A	B	A	B	-	A	A	A	B	A	B	B	B	-	A	B	-	B	A	A	B	A	-	B	B	B	B	-	A	-	B	B	A	-	A	B	B	B	B	B	B
Ps153825	5.1	11.4	Ps000228	Ps900115	Ps000201	Ps900115	0.149541	B	A	B	A	B	B	A	A	A	B	-	B	B	B	A	A	-	B	B	A	A	B	-	B	-	B	B	B	-	A	A	B	-	A	B	A	-	B	B	B	B	B
Ps129870	5.1	12.3	Ps000228	Ps900115	Ps000201	Ps900115	0.0640775	B	A	B	A	B	B	A	A	A	B	A	B	B	B	A	A	B	B	B	A	A	-	A	B	B	B	B	B	B	A	A	B	B	A	B	A	B	B	B	-	B	-
Ps137276	5.1	12	Ps000228	Ps900115	Ps000201	Ps900115	0.159854	-	A	B	A	B	B	A	A	A	-	A	-	B	B	A	A	B	B	B	A	A	B	A	B	B	B	B	B	B	A	A	-	B	A	-	A	-	B	B	B	B	B
Ps153579	5.1	11.4	Ps000201	Ps000228	Ps000201	Ps000260	0.0781691	B	A	B	A	B	B	A	A	A	-	A	B	B	-	-	-	B	B	B	A	A	B	A	B	B	B	B	-	B	A	A	B	B	A	-	A	B	-	B	B	B	B
Ps135006	5.1	12.6	Ps000201	Ps000228	Ps000201	Ps900115	0.0640775	B	A	B	-	B	B	A	-	A	B	A	B	-	B	A	A	B	B	B	A	A	-	A	B	B	B	B	B	B	A	A	B	B	A	B	A	B	-	B	B	B	B
Ps146212	5.1	11.7	Ps000228	Ps900115	Ps000201	Ps900115	0.113846	B	A	-	A	-	-	A	-	-	B	A	B	B	B	A	A	B	B	B	A	A	B	A	-	B	B	B	B	B	A	A	B	B	A	B	A	B	B	-	B	B	B
Ps154696	5.1	11.4	Ps000228	Ps900115	Ps000201	Ps900115	0.0163092	B	-	B	A	B	B	A	A	A	B	-	B	B	B	A	-	B	-	B	A	A	B	A	B	-	B	B	B	B	-	A	B	B	-	B	A	B	B	B	B	-	B
Ps127431	5.1	12.3	Ps000228	Ps900115	Ps000201	Ps900115	0.0640775	B	A	B	A	B	B	A	A	A	B	A	B	B	B	A	A	B	-	B	A	A	B	A	B	B	B	B	B	B	-	A	B	-	-	B	A	B	B	B	B	-	B
Ps122096	5.1	12.6	Ps000228	Ps900115	Ps000201	Ps900115	0.0474254	B	-	B	A	B	-	A	A	A	B	A	B	B	B	A	-	B	B	B	A	A	B	A	B	B	B	-	B	B	A	A	B	B	A	B	A	B	B	-	B	B	B
Ps124624	5.1	12.3	Ps000201	Ps000228	Ps000201	Ps000260	0.0640775	B	A	B	A	B	-	A	A	-	B	A	B	B	B	-	A	B	B	B	A	A	B	A	B	B	B	B	B	-	A	A	B	B	A	B	A	B	B	B	B	-	B
Ps155996	5.1	11.4	Ps000201	Ps000228	Ps000201	Ps900115	0.149541	B	A	B	-	B	-	A	A	A	B	-	B	B	B	A	A	B	B	-	A	A	B	A	B	B	-	B	B	B	A	A	B	B	A	-	A	B	-	B	B	B	-
Ps150572	5.1	12	Ps000228	Ps900115	Ps000201	Ps900115	0.113846	B	A	B	A	B	-	A	-	A	B	A	B	-	B	A	A	-	B	B	A	A	B	A	B	B	B	B	B	B	-	A	-	B	A	B	A	B	-	B	B	-	B
Ps108632	5.1	12.9	Ps000228	Ps900115	Ps000201	Ps900115	0.0704404	B	A	B	A	B	B	A	-	A	B	A	B	B	B	A	A	B	B	B	A	A	B	A	B	B	B	B	B	B	A	A	B	B	A	B	A	B	B	-	-	-	B
Ps160640	5.1	10.8	Ps000228	Ps900115	Ps000201	Ps900115	0.138982	B	A	B	A	B	-	A	A	A	B	A	B	B	-	A	A	B	-	B	A	A	B	A	B	-	-	B	B	-	A	A	-	B	-	B	A	B	B	B	B	B	B
Ps126178	5.1	12.3	Ps000228	Ps900115	Ps000201	Ps900115	0.0640775	B	A	B	A	B	B	A	A	-	-	A	B	B	B	A	A	B	B	B	A	A	B	A	B	B	B	B	-	B	A	A	B	B	A	B	-	B	B	-	-	B	B
Ps158111	5.1	11.4	Ps000228	Ps900115	Ps000201	Ps900115	0.0231409	B	A	B	A	B	B	A	A	A	-	-	B	-	B	A	A	B	B	B	A	-	B	-	B	B	B	B	B	B	-	A	B	B	-	B	A	B	B	B	-	B	B
Ps159584	5.1	11.4	Ps000201	Ps000228	Ps000201	Ps900115	0.0515759	B	A	B	-	B	B	A	A	A	B	A	B	-	B	A	A	B	B	-	A	-	B	A	-	B	-	B	B	-	-	A	B	B	A	B	-	-	B	B	B	B	B
Ps124655	5.1	12.3	Ps000228	Ps900115	Ps000201	Ps900115	0.0640775	B	A	B	A	-	-	A	A	A	B	A	B	B	B	A	A	B	B	B	A	A	B	A	B	B	B	B	B	B	A	A	B	B	A	B	-	-	B	B	B	-	B
Ps154064	5.1	11.4	Ps000228	Ps900115	Ps000201	Ps900115	0.037373	B	A	B	A	-	B	A	A	-	-	A	B	B	B	A	A	B	B	-	A	-	B	A	B	B	B	B	-	B	-	A	B	B	-	B	A	B	B	B	B	B	B
Ps152931	5.1	11.4	Ps000201	Ps000228	Ps000201	Ps000260	0.0163092	B	A	-	A	B	-	A	A	A	B	-	B	B	B	-	A	B	B	-	A	-	B	A	B	B	B	B	B	B	A	A	B	B	-	B	A	B	-	B	B	B	B
Ps156647	5.1	11.7	Ps000201	Ps000228	Ps000201	Ps900115	0.037373	B	A	B	A	B	-	A	A	A	B	-	B	-	B	A	-	B	-	B	-	A	B	A	B	B	B	B	B	B	A	A	B	-	-	B	A	B	B	B	B	B	-
Ps111371	5.1	12.9	Ps000228	Ps900115	Ps000201	Ps900115	0.0348085	B	A	B	A	B	B	A	A	A	B	-	-	B	B	A	A	B	B	B	A	-	B	A	B	B	B	B	B	B	A	A	B	-	A	B	A	B	B	B	B	B	B
Ps149934	5.1	12	Ps000228	Ps900115	Ps000201	Ps900115	0.0577796	B	-	-	A	B	B	A	-	A	B	A	B	-	B	A	A	B	B	B	A	A	-	A	B	B	B	B	-	B	-	A	B	-	A	B	A	B	B	B	B	B	B
Ps107954	5.1	12.9	Ps000228	Ps900115	Ps000201	Ps900115	0.131668	B	A	-	A	B	-	A	A	A	B	A	B	B	B	A	A	B	B	B	A	A	-	A	B	B	B	B	B	B	A	A	B	-	A	B	A	B	B	B	B	B	B
Ps146187	5.1	11.7	Ps000228	Ps900115	Ps000201	Ps900115	0.205903	B	A	B	A	B	B	A	A	A	B	A	B	B	B	A	A	B	B	B	A	A	-	A	B	-	B	B	-	-	A	A	B	B	A	B	A	B	B	-	B	-	B
Ps123630	5.1	12.9	Ps000228	Ps900115	Ps000201	Ps900115	0.169912	B	A	B	A	B	B	A	A	A	B	A	B	-	B	A	A	B	B	B	A	A	B	A	B	B	B	B	-	-	A	A	B	B	A	B	A	B	B	-	B	B	B
Ps145827	5.1	12	Ps000228	Ps900115	Ps000201	Ps900115	0.113846	B	A	B	A	B	-	A	A	A	B	A	B	-	B	A	A	B	-	B	A	A	-	A	B	B	B	B	B	B	A	A	B	B	A	B	-	B	B	B	B	-	B
Ps161160	5.1	11.1	Ps000201	Ps000228	Ps000201	Ps000260	0.070546	B	A	B	-	B	B	A	A	A	B	A	B	-	B	-	A	B	B	B	A	A	B	A	B	-	B	B	-	-	-	A	B	B	A	-	-	B	B	-	B	-	B
Ps160828	5.1	10.8	Ps000201	Ps000228	Ps000201	Ps000260	0.138982	B	A	B	A	B	-	A	A	A	B	A	B	B	B	-	-	-	B	B	A	A	B	A	B	B	B	B	-	-	A	A	B	-	A	B	A	B	-	B	B	B	B
Ps124486	5.1	12.3	Ps000228	Ps900115	Ps000201	Ps900115	0.0640775	B	A	B	A	B	B	A	A	A	B	A	B	B	B	A	A	-	B	B	A	A	-	A	B	B	B	B	B	B	A	A	B	B	-	-	-	B	B	-	B	B	B
Ps160849	5.1	10.8	Ps000228	Ps900115	Ps000201	Ps900115	0.138982	B	-	-	A	B	-	A	A	A	-	-	B	B	B	A	A	B	B	B	A	A	B	A	B	B	B	B	B	-	A	A	-	B	-	B	A	B	B	B	-	B	B
Ps104784	5.1	13.2	Ps000228	Ps900115	Ps000201	Ps900115	0.0253473	B	A	B	A	B	B	A	A	A	B	A	B	B	B	A	A	B	B	B	A	A	B	A	B	B	B	B	B	B	A	A	B	B	-	B	A	B	B	B	B	B	-
Ps161259	5.1	10.8	Ps000228	Ps900115	Ps000201	Ps900115	0.138982	B	A	-	A	B	-	A	A	-	B	-	-	B	B	A	A	B	B	B	-	A	-	A	B	B	B	B	B	-	A	A	B	-	A	B	A	B	B	B	B	B	B
Ps134125	5.1	12.6	Ps000201	Ps000228	Ps000201	Ps000260	0.0307536	B	-	B	A	B	B	A	A	A	B	A	B	-	B	-	A	B	-	B	A	A	B	A	B	B	-	B	B	B	A	A	B	B	-	B	A	B	B	B	B	B	B
Ps138456	5.1	12.3	Ps000228	Ps900115	Ps000201	Ps900115	0.0423302	B	-	-	A	B	B	A	A	A	B	-	B	-	B	A	A	B	B	B	A	A	B	A	B	-	B	B	B	B	-	A	B	B	A	B	A	-	B	B	B	B	B
Ps147124	5.1	11.7	Ps000201	Ps000228	Ps000201	Ps900115	0.205903	B	A	B	A	B	-	A	A	A	-	A	B	B	B	A	A	-	B	B	-	A	B	A	B	B	B	B	B	B	A	A	B	B	A	B	A	B	B	B	-	-	B
Ps156245	5.1	11.4	Ps000201	Ps000228	Ps000201	Ps900115	0.0781691	B	A	B	A	B	B	A	-	A	B	A	B	B	-	A	A	B	B	B	-	A	-	A	B	-	B	-	B	B	A	A	B	B	-	-	A	B	B	B	-	B	B
Ps107988	5.1	12.9	Ps000228	Ps900115	Ps000201	Ps900115	0.0704404	B	A	B	A	B	B	A	A	A	B	A	B	B	B	A	A	B	B	B	A	A	B	A	B	B	-	B	B	B	A	A	B	B	-	B	A	B	B	-	B	B	B
Ps152126	5.1	11.4	Ps000201	Ps000228	Ps000201	Ps000260	0.0163092	B	A	-	A	-	B	A	A	A	B	A	B	B	B	-	A	B	B	B	A	-	B	A	B	B	B	B	B	B	-	A	B	B	-	-	A	-	B	B	B	B	B
Ps125492	5.1	12.3	Ps000201	Ps000228	Ps000201	Ps900115	0.0640775	B	A	B	-	B	-	A	A	A	B	A	B	B	B	A	A	-	B	B	A	-	B	A	-	B	B	B	B	B	A	A	B	B	A	B	A	B	B	B	B	B	B
Ps144114	5.1	12	Ps000228	Ps900115	Ps000201	Ps900115	0.0423302	B	A	B	A	B	B	A	-	A	B	A	-	B	B	A	A	B	B	B	A	A	B	-	B	B	B	-	B	B	A	A	-	-	A	B	-	B	B	B	B	B	B
Ps145459	5.1	11.7	Ps000228	Ps900115	Ps000201	Ps900115	0.0577796	B	-	B	A	B	-	A	A	A	B	A	B	B	-	A	A	-	-	-	A	A	B	A	B	B	B	B	B	B	-	A	B	B	A	B	-	B	B	B	B	B	B
Ps109126	5.1	12.9	Ps000228	Ps900115	Ps000201	Ps900115	0.0704404	B	A	B	A	B	B	A	A	A	B	A	B	B	B	A	A	B	-	B	A	A	-	A	B	B	B	B	B	B	A	A	B	B	A	B	A	B	B	-	B	B	B
Ps146669	5.1	12	Ps000228	Ps900115	Ps000201	Ps900115	0.113846	B	A	-	A	B	-	A	A	A	B	A	-	-	B	A	A	B	B	B	-	A	B	A	B	B	B	B	B	B	A	A	B	-	-	B	A	B	B	B	-	B	B
Ps160497	5.1	11.1	Ps000201	Ps000228	Ps000201	Ps900115	0.0136637	B	-	B	A	-	B	A	A	A	B	A	B	-	B	A	A	B	B	-	-	-	B	-	B	B	B	B	-	B	A	A	B	B	A	B	-	B	-	B	B	B	B
Ps136256	5.1	12	Ps000228	Ps900115	Ps000201	Ps900115	0.0858128	B	A	-	A	-	B	A	-	A	B	A	B	B	B	A	A	B	B	B	A	A	B	A	B	B	B	B	B	B	A	A	-	-	A	-	A	B	B	B	B	B	B
Ps158394	5.1	11.4	Ps000228	Ps900115	Ps000201	Ps900115	0.516412	-	A	B	A	B	-	A	A	A	-	A	-	-	-	A	A	B	-	B	A	A	B	A	B	-	B	B	B	B	A	A	B	-	A	B	A	B	B	B	-	B	B
Ps160296	5.1	11.4	Ps000228	Ps900115	Ps000201	Ps900115	0.0515759	B	-	B	A	B	B	A	A	A	B	-	B	-	-	A	A	B	-	B	A	A	B	A	-	B	B	B	B	B	-	A	B	B	A	-	-	B	B	B	B	B	-
Ps102279	5.1	13.5	Ps000228	Ps900115	Ps000201	Ps900115	0.0768432	B	A	B	A	B	-	A	A	A	B	A	B	B	B	A	A	B	B	B	A	A	B	A	B	B	B	B	B	B	A	A	B	B	A	B	A	B	B	B	B	B	B
Ps121386	5.1	12.6	Ps000228	Ps900115	Ps000201	Ps900115	0.169912	B	A	-	A	B	B	A	A	A	B	A	-	B	B	A	A	B	B	B	A	A	B	A	B	B	B	B	-	-	A	A	B	B	A	B	A	-	B	B	B	B	B
Ps127303	5.1	12.3	Ps000228	Ps900115	Ps000201	Ps900115	0.0640775	B	A	B	A	B	-	A	A	A	B	-	B	B	B	A	A	B	B	B	A	A	B	A	B	B	B	B	B	-	A	A	B	B	A	B	A	B	B	-	-	B	B
Ps130476	5.1	12.3	Ps000201	Ps000228	Ps000201	Ps900115	0.00547855	B	A	B	-	B	B	A	A	A	B	A	B	B	B	A	A	B	B	B	A	A	B	A	B	B	B	B	B	B	A	-	B	B	-	B	-	B	B	B	-	B	B
Ps127057	5.1	12.3	Ps000228	Ps900115	Ps000201	Ps900115	0.0640775	B	A	B	A	B	B	A	A	A	B	A	B	B	B	A	A	-	B	B	A	A	B	A	B	B	B	B	B	B	A	A	B	B	A	B	-	B	B	-	-	B	B
Ps120799	5.1	12.6	Ps000228	Ps900115	Ps000201	Ps900115	0.0474254	B	A	B	A	B	B	-	A	A	B	A	-	B	B	A	-	B	B	B	A	A	B	A	B	B	B	B	B	-	A	A	B	B	A	B	A	B	B	B	B	B	B
Ps134544	5.1	12.3	Ps000228	Ps900115	Ps000201	Ps900115	0.0307536	B	A	B	A	B	B	A	-	A	B	A	B	B	B	A	A	B	B	B	A	A	-	A	B	B	B	B	B	-	A	A	B	B	-	B	A	B	B	B	B	B	B
Ps158878	5.1	11.1	Ps000228	Ps900115	Ps000201	Ps900115	0.0515759	-	A	B	A	B	B	A	-	A	B	A	-	B	-	A	A	B	-	B	-	A	B	A	B	B	B	-	B	B	A	A	B	B	-	B	-	B	B	B	-	B	B
Ps117189	5.1	12.6	Ps000228	Ps900115	Ps000201	Ps900115	0.0934478	B	A	B	A	B	B	A	A	A	B	A	B	B	B	A	A	-	B	B	A	A	B	A	B	B	B	B	-	-	A	-	B	B	A	B	A	B	B	B	B	B	-
Ps122263	5.1	12.9	Ps000228	Ps900115	Ps000201	Ps900115	0.0934478	-	A	B	A	B	B	A	A	A	B	A	B	-	B	A	A	B	B	-	A	A	B	A	B	B	B	-	B	B	A	A	B	B	-	B	A	B	B	B	B	B	B
Ps160590	5.1	10.8	Ps000228	Ps900115	Ps000201	Ps900115	0.249817	B	A	B	A	-	-	A	A	A	-	A	B	B	B	A	-	-	B	B	A	A	B	A	B	-	B	B	B	B	-	A	B	-	A	B	A	-	B	B	B	-	B
Ps145277	5.1	11.7	Ps000201	Ps000228	Ps000201	Ps900115	0.0577796	B	A	B	A	B	B	A	A	A	B	A	B	B	B	A	-	-	B	-	-	A	B	A	B	B	B	B	-	B	A	A	B	B	A	B	-	B	-	B	B	B	B
Ps114757	5.1	12.6	Ps000228	Ps900115	Ps000201	Ps900115	0.0934478	B	A	-	A	B	B	A	-	A	B	A	B	B	B	A	A	B	-	B	A	A	B	A	B	B	B	B	B	B	A	A	B	B	A	B	A	B	-	B	B	B	B
Ps103156	5.1	13.2	Ps000228	Ps900115	Ps000201	Ps900115	0.0526323	B	-	B	A	B	B	A	A	A	B	A	B	B	B	A	A	B	B	B	A	A	B	A	B	B	B	B	B	B	A	A	B	B	A	B	A	B	B	B	B	-	B
Ps145542	5.1	12	Ps000201	Ps000228	Ps000201	Ps900115	0.205903	B	A	B	A	B	-	A	A	A	B	A	B	-	-	A	A	-	B	-	-	A	B	A	B	B	B	B	B	B	A	A	B	B	A	B	A	-	B	-	B	B	B
[truncated: 8,285 more rows]
[truncated: 6 more columns]

## Sheet: PsLGIII
SnpName	Genetic Position (cM)	Two-point LOD of linkage to the closest marker in the framework map	marker of the framework map on Left side of the placed marker	marker of the framework map on Right side of the placed marker	left marker of the framework map that delimit an interval into which the placed marker lies with a LOD score of at least 3.0	right marker of the framework map that delimit an interval into which the placed marker lies with a LOD score of at least 3.0	χ2	BAP8_043	BAP8_130	BAP8_184	BAP8_066	BAP8_142	BAP8_172	BAP8_186	BAP8_243	BAP8_018	BAP8_070	BAP8_136	BAP8_198	BAP8_006	BAP8_051	BAP8_057	BAP8_060	BAP8_109	BAP8_129	BAP8_183	BAP8_195	BAP8_215	BAP8_024	BAP8_110	BAP8_131	BAP8_165	BAP8_197	BAP8_203	BAP8_056	BAP8_094	BAP8_099	BAP8_126	BAP8_004	BAP8_116	BAP8_166	BAP8_177	BAP8_202	BAP8_029	BAP8_037	BAP8_047	BAP8_082	BAP8_090	BAP8_104
[truncated: 12,868 more rows]
[truncated: 6 more columns]

[truncated: 4 more sheets: PsLGIV, PsLGV, PsLGVI, PsLVII]
