# Supplementary material for: SNP discovery and genetic mapping using genotyping by sequencing of whole genome genomic DNA from a pea RIL population
Source: BMC Genomics. 2016 Feb 18;17:121. doi: 10.1186/s12864-016-2447-2 (PMC4758021; doi:10.1186/s12864-016-2447-2)
Supplement: Additional file 8: Table S5. — Polymorphism data in the 8 sequenced pea parental lines and 4 F1 selected from a set of 953 SNP genotyped in LGC Kasp™ assay methods on 1438 different pea accessions. “A” corresponds to ‘Baccara’ homozygous parental genotype, “B” to ‘PI180693’ homozygous parental genotype, “H” to an heterozygous genotype, “-” indicates uncalled data. For each pea line, if available, different seed lots were genotyped (seed-DNA lot numbers in parenthesis). (XLSX 115 kb) [file 12864_2016_2447_MOESM8_ESM.xlsx]

## Sheet: Additional file 8 – Table S5
		PI180693		F1 Baccara*PI180693	Baccara			F1 Baccara*552	552	DP			F1 JI296*DP	JI296			F1 JI296*FP	FP	Champagne		Terese
SNP	IdSnp / DNA Id	5576	1358	3134	1540	2671	2503	3133	2490	5803	3127	2690	3130	3129	1689	2712	3131	2649	2684	5757	2743
A/G	Ps100098	B	B	H	A	A	A	H	B	B	B	B	H	A	A	A	A	A	B	B	A
A/C	Ps100112	B	B	H	A	A	A	H	B	B	B	B	B	B	B	B	H	A	B	B	A
A/G	Ps100151	B	B	H	A	A	A	-	A	B	B	B	B	B	B	B	B	B	B	B	B
A/G	Ps100163	B	B	H	A	A	A	H	B	B	B	B	B	B	B	B	B	B	B	B	H
A/G	Ps100218	B	B	H	A	A	A	H	-	A	A	A	H	B	B	B	H	A	A	A	A
C/T	Ps100355	B	B	H	A	A	A	H	B	B	B	B	H	A	A	A	H	B	B	B	A
C/T	Ps100364	B	B	H	A	A	A	H	B	B	B	B	H	A	A	A	H	B	B	B	A
A/G	Ps100397	B	B	H	A	A	A	H	B	B	B	B	B	B	B	B	-	A	B	B	A
A/G	Ps100487	B	B	H	A	A	A	H	B	A	A	A	A	-	A	A	A	A	A	A	B
A/G	Ps100494	B	B	H	A	A	A	A	-	A	A	A	H	B	B	B	B	B	A	A	A
A/G	Ps100591	-	-	-	A	A	A	A	-	-	-	-	A	A	A	A	A	-	-	-	A
T/G	Ps100622	B	B	H	A	A	A	H	B	A	A	A	H	B	B	B	H	A	B	B	H
C/T	Ps100641	B	B	H	A	A	A	A	A	B	B	B	H	A	A	A	H	B	B	B	A
T/G	Ps100801	B	B	H	A	A	A	-	H	B	B	B	H	A	A	A	H	B	B	B	A
A/G	Ps100966	B	B	H	A	-	A	H	B	B	B	B	-	A	A	A	A	A	B	B	A
A/C	Ps101097	B	B	H	A	A	A	H	B	B	B	B	B	B	B	B	B	B	B	B	A
C/T	Ps101177	B	B	H	A	A	A	H	B	B	B	B	B	B	B	B	H	A	B	B	A
A/G	Ps101228	B	B	H	A	A	A	A	A	B	B	B	H	A	A	A	H	B	B	B	A
T/G	Ps101246	B	B	H	A	A	A	H	-	A	A	A	H	B	B	B	H	A	A	A	H
A/C	Ps101252	-	-	-	A	A	A	A	A	-	-	-	-	-	-	-	A	A	-	-	A
C/T	Ps101340	B	B	H	A	A	A	A	A	B	B	B	B	B	B	B	B	B	B	B	A
A/G	Ps101401	B	B	H	A	A	A	A	A	B	B	B	H	A	A	A	H	B	B	B	A
C/G	Ps101490	B	B	H	A	A	A	A	A	B	B	B	H	A	A	A	H	B	B	B	A
T/G	Ps101546	B	B	H	A	A	A	H	B	A	A	A	H	B	B	B	H	H	A	A	B
C/T	Ps101554	B	B	H	A	A	A	H	B	B	B	B	B	B	B	B	B	B	B	B	A
C/T	Ps101682	B	B	H	A	A	A	H	-	B	B	B	B	B	B	B	H	A	B	B	A
A/G	Ps101848	B	B	H	A	A	A	A	A	B	B	B	-	A	A	A	H	B	B	B	B
C/G	Ps101909	B	B	H	A	A	A	A	A	B	B	B	H	A	A	A	H	B	B	B	A
C/T	Ps101971	B	B	H	A	A	A	H	-	B	B	B	H	A	A	A	H	B	B	B	A
A/G	Ps102082	B	B	H	A	A	A	H	-	B	B	B	H	A	A	A	H	B	B	B	A
C/T	Ps102310	B	B	H	A	A	A	-	H	B	B	B	H	A	A	A	H	B	B	B	A
A/G	Ps102315	B	B	H	A	A	A	H	-	B	B	B	H	A	A	A	H	B	B	B	A
A/G	Ps102379	B	B	H	A	A	A	H	H	B	B	B	H	A	A	A	H	B	B	B	A
C/T	Ps102389	B	B	-	A	A	A	A	-	B	B	B	B	B	B	B	-	A	B	B	A
C/T	Ps102444	B	B	H	-	A	A	H	B	B	B	B	H	A	A	A	H	B	A	A	B
A/G	Ps102447	B	B	H	A	A	A	H	B	B	B	B	H	A	A	A	A	A	B	B	A
A/T	Ps102494	B	B	H	A	A	A	A	A	A	A	A	A	A	A	A	A	A	A	A	A
A/G	Ps102533	B	B	H	A	A	A	-	-	B	B	B	B	B	B	B	H	A	B	B	A
A/G	Ps102541	B	B	H	A	A	A	H	B	B	B	B	H	A	A	A	A	A	B	B	A
A/G	Ps102543	B	B	H	A	A	A	H	B	A	A	A	-	B	B	B	H	A	A	A	A
C/T	Ps102581	B	B	H	A	A	A	H	B	B	B	B	H	A	A	A	A	A	B	B	A
C/T	Ps102620	B	B	H	A	A	A	A	A	B	B	B	H	A	A	A	A	A	B	B	A
C/T	Ps102706	B	B	H	A	A	A	A	A	B	B	B	H	A	A	A	H	B	B	B	A
C/T	Ps102918	B	B	H	A	A	A	-	H	B	B	B	H	A	A	A	A	A	B	B	B
A/C	Ps102939	B	B	H	A	A	A	H	B	B	B	B	B	B	B	H	H	A	B	B	A
C/G	Ps102958	B	B	H	A	A	A	H	B	B	B	B	H	A	A	A	H	B	B	B	-
A/T	Ps103181	B	B	H	A	A	A	A	A	A	A	A	A	-	-	-	A	A	A	A	A
A/G	Ps103202	B	B	H	A	A	A	A	A	A	A	A	A	A	A	A	A	A	A	A	A
C/T	Ps103238	B	B	-	A	A	A	H	H	A	A	A	H	B	B	B	H	A	B	B	A
A/C	Ps103268	B	B	H	A	A	A	H	B	B	B	B	H	A	A	A	A	A	B	B	A
A/G	Ps103288	B	B	H	A	A	A	H	B	B	B	B	H	A	A	A	A	A	B	B	A
A/G	Ps103435	B	B	H	A	A	A	A	A	B	B	B	H	A	A	A	A	A	B	B	A
A/G	Ps103563	B	B	H	A	A	A	-	B	A	A	A	A	A	A	A	A	A	A	A	A
C/G	Ps103581	B	B	H	A	A	A	A	-	B	B	B	B	B	B	B	H	A	B	B	A
A/C	Ps103610	B	B	H	A	A	A	-	H	B	B	B	B	B	B	B	H	A	B	B	A
C/T	Ps103620	B	B	H	A	A	A	A	-	B	B	B	B	B	B	B	B	B	B	B	A
A/G	Ps103625	B	B	H	A	A	A	H	B	B	B	B	B	B	B	B	H	A	B	B	A
A/T	Ps103650	B	B	H	A	A	A	A	A	B	B	B	H	A	A	A	A	A	B	B	A
A/C	Ps103749	B	B	H	A	A	A	A	A	B	B	B	H	A	A	A	A	A	B	B	A
A/G	Ps103820	B	B	H	A	A	A	H	B	B	B	B	H	A	A	A	A	A	B	B	B
C/T	Ps103978	B	B	H	A	A	A	A	A	B	B	B	H	A	A	A	A	A	B	B	A
C/T	Ps104072	B	B	H	A	A	A	H	B	B	B	B	B	B	B	B	H	A	B	B	A
A/C	Ps104092	B	B	H	A	A	A	A	A	B	B	B	H	A	A	A	H	B	B	B	A
A/G	Ps104176	B	B	H	A	A	A	H	B	B	B	B	B	B	B	B	B	B	B	B	A
A/T	Ps104200	B	B	H	A	A	A	A	A	B	B	B	H	A	A	A	A	A	B	B	A
C/T	Ps104352	B	B	H	A	A	A	A	A	B	B	B	H	A	A	A	A	A	B	B	A
C/T	Ps104660	B	B	H	A	A	A	H	B	A	A	A	H	B	B	B	H	A	A	A	B
C/T	Ps104666	B	B	-	A	A	A	-	B	B	B	B	-	A	A	A	A	A	B	B	A
T/G	Ps104712	B	B	H	A	A	A	H	B	B	B	B	H	A	A	A	A	A	A	A	B
A/G	Ps104721	B	B	H	A	A	A	A	A	A	A	A	A	A	A	A	H	B	A	A	A
C/T	Ps104823	B	B	H	A	A	A	A	A	B	B	B	B	B	B	B	B	B	B	B	B
T/G	Ps104825	B	B	H	A	A	A	A	-	B	B	B	B	B	B	B	B	B	B	B	A
A/G	Ps104848	B	B	H	A	A	A	H	B	B	B	B	B	B	B	B	H	A	B	B	A
A/G	Ps104917	B	B	H	A	A	A	A	A	B	B	B	H	A	A	A	A	A	B	B	A
A/C	Ps104954	B	B	H	A	A	A	A	A	B	B	B	H	A	A	A	H	B	A	A	-
A/T	Ps105042	B	B	-	A	A	A	-	-	B	B	B	B	B	B	B	H	A	B	B	A
A/G	Ps105087	B	B	H	A	A	A	A	A	A	A	A	A	A	A	A	H	B	A	A	A
T/G	Ps105189	B	-	H	A	A	A	H	B	B	B	B	H	A	A	A	H	B	B	B	A
C/T	Ps105237	B	B	H	A	-	A	A	A	A	A	A	H	B	B	B	-	A	A	A	A
C/T	Ps105262	B	B	H	A	A	A	H	B	B	B	B	H	A	A	A	H	B	B	B	A
A/G	Ps105413	B	B	H	A	A	A	H	B	B	B	B	B	B	B	B	B	B	B	B	A
C/G	Ps105455	B	B	H	A	A	A	H	B	B	B	B	H	A	A	A	A	A	B	B	A
T/G	Ps105528	B	B	H	A	A	A	-	-	-	-	-	A	A	A	A	A	-	B	B	A
A/G	Ps105548	B	B	-	A	A	A	A	-	B	B	B	H	A	A	A	A	A	B	B	A
T/G	Ps105549	B	B	H	A	A	A	A	-	B	B	B	H	A	A	A	A	A	B	B	A
T/G	Ps105558	B	B	H	A	A	A	A	A	B	B	B	B	B	B	B	H	A	B	B	A
C/T	Ps105642	B	B	H	A	A	A	H	B	B	B	B	B	B	B	B	B	B	B	B	A
A/T	Ps105680	B	B	H	A	A	A	H	B	A	A	A	H	B	B	B	H	A	B	B	A
A/G	Ps105710	B	B	H	A	A	A	-	B	B	B	B	H	A	A	A	H	B	B	B	B
A/G	Ps105740	B	B	H	A	A	A	H	B	B	B	B	H	A	A	A	A	A	B	B	A
A/G	Ps105752	B	B	H	A	A	A	A	A	B	B	B	B	B	B	B	H	A	B	B	A
C/T	Ps105826	B	B	H	A	A	A	H	B	A	A	A	H	B	B	-	H	A	B	B	A
A/C	Ps105985	B	B	-	A	A	A	A	A	A	A	A	H	B	B	B	H	A	A	A	A
A/G	Ps106049	B	B	H	A	A	A	A	A	B	B	B	H	A	A	A	A	A	B	B	A
A/G	Ps106068	B	B	H	A	A	A	H	B	A	A	A	H	B	B	B	B	B	B	B	A
A/C	Ps106146	B	B	H	A	A	A	A	A	A	A	A	A	A	A	A	H	B	B	B	A
C/T	Ps106244	B	B	H	A	A	A	A	A	B	B	B	H	A	A	A	A	A	B	B	A
A/C	Ps106249	B	B	H	A	A	A	A	A	A	A	A	A	A	A	A	A	A	A	A	A
A/G	Ps106291	B	B	H	A	A	A	A	A	B	B	B	H	A	A	A	H	B	B	B	A
A/G	Ps106299	B	B	H	A	A	A	H	-	B	B	B	H	A	A	A	A	A	B	B	A
A/G	Ps106302	B	B	H	A	A	A	-	-	B	B	B	H	A	A	A	H	B	B	B	A
C/T	Ps106320	B	B	H	A	A	A	A	A	B	B	B	H	A	A	A	H	B	B	B	A
C/T	Ps106337	B	B	H	A	A	A	H	-	B	B	B	B	B	B	B	H	A	B	B	A
C/T	Ps106404	B	B	H	A	A	A	A	A	B	B	B	H	A	A	A	A	A	B	B	A
T/G	Ps106483	B	B	H	A	A	A	-	H	B	B	B	H	A	A	A	A	A	B	B	A
A/G	Ps106505	B	B	H	A	A	A	A	-	A	A	A	H	B	B	B	B	B	A	A	A
C/T	Ps106552	B	B	H	A	A	A	A	A	A	A	A	H	B	B	B	H	A	B	B	A
T/G	Ps106556	B	B	H	A	A	A	H	B	B	B	B	B	B	B	B	H	A	B	B	A
A/G	Ps106649	B	B	-	A	A	A	H	B	B	B	B	H	A	A	A	H	B	B	B	B
A/G	Ps106650	B	B	H	A	A	A	H	-	B	B	B	H	A	A	A	A	A	B	B	B
T/G	Ps106663	B	B	H	A	A	A	H	B	A	A	A	H	B	B	B	H	A	B	B	A
C/T	Ps106718	B	B	H	A	A	A	A	A	B	B	B	H	A	A	A	A	A	B	B	A
A/G	Ps106736	B	B	-	A	A	A	H	-	A	A	A	H	B	B	B	H	A	A	A	A
C/G	Ps106751	B	B	H	A	A	A	A	A	B	B	B	H	A	A	A	H	B	B	B	A
C/T	Ps106793	B	B	H	-	A	A	H	B	B	B	B	B	B	B	B	H	A	B	B	A
C/T	Ps106926	B	B	H	A	A	A	H	B	A	A	A	A	A	A	A	A	A	A	A	A
A/G	Ps106996	B	-	H	-	A	A	-	B	B	B	B	B	B	B	B	H	A	B	B	A
C/T	Ps107078	B	B	H	A	A	A	A	A	B	B	B	H	A	A	A	H	B	B	B	A
A/C	Ps107087	B	B	-	A	A	-	H	B	B	B	B	H	A	A	A	A	A	B	B	A
A/T	Ps107159	B	B	H	A	A	A	H	B	B	B	B	B	B	B	B	H	A	B	B	B
A/G	Ps107179	B	B	H	A	A	A	H	B	B	B	B	H	A	A	A	A	A	B	B	A
C/T	Ps107181	B	B	H	A	A	A	A	A	B	B	B	H	A	A	A	A	A	B	B	A
C/T	Ps107193	B	B	H	A	A	A	H	B	B	B	B	H	A	A	A	H	B	B	B	B
C/T	Ps107257	B	B	H	A	A	A	A	A	B	B	B	H	A	A	A	H	B	B	B	A
A/C	Ps107355	B	B	H	A	A	A	H	B	B	B	B	H	A	A	A	A	A	B	B	A
T/G	Ps107952	B	B	H	A	A	A	H	B	B	B	B	B	B	B	B	B	B	B	B	A
C/T	Ps108006	B	B	H	A	A	A	A	A	A	A	A	A	A	A	A	A	A	A	A	B
A/C	Ps108091	B	B	H	A	A	A	H	B	A	A	A	H	B	B	B	B	B	B	B	A
C/T	Ps108142	B	B	H	A	A	A	A	A	A	A	A	A	A	A	A	H	B	A	A	A
C/T	Ps108199	B	B	H	A	A	A	H	H	B	B	B	H	A	A	A	H	B	B	B	A
A/G	Ps108200	B	B	H	A	A	A	-	-	B	B	B	B	B	B	B	-	A	B	B	A
A/C	Ps108240	B	B	H	A	A	A	-	-	-	-	-	A	A	A	A	H	B	-	-	A
A/G	Ps108273	B	B	H	A	A	A	A	A	B	B	B	-	A	A	A	-	B	B	B	A
A/T	Ps108355	B	-	H	A	A	A	H	B	B	B	B	B	B	B	B	H	A	B	B	A
A/G	Ps108543	B	B	H	A	A	A	H	B	B	B	B	B	B	B	B	H	A	A	A	A
T/G	Ps108967	B	B	H	A	A	A	-	A	B	B	B	B	B	B	B	B	B	B	B	A
A/G	Ps109185	B	B	H	A	A	A	A	A	A	A	A	A	A	A	A	H	B	A	A	A
C/T	Ps109264	B	B	H	H	A	A	-	-	B	B	B	H	A	A	A	A	A	B	B	B
C/T	Ps109268	B	B	H	A	A	A	H	B	B	B	B	H	A	A	A	H	B	B	B	A
T/G	Ps109292	B	B	-	A	A	A	A	-	B	B	B	B	B	B	B	H	A	B	B	A
A/G	Ps109329	B	B	H	A	A	A	H	B	A	A	A	H	B	B	B	H	A	A	A	B
C/T	Ps109348	B	B	-	A	A	A	H	B	A	A	A	H	B	B	B	H	A	A	A	A
C/T	Ps109377	B	B	-	A	A	A	-	-	B	B	B	B	-	-	-	A	A	-	-	A
A/T	Ps109379	B	B	H	A	A	A	A	A	B	B	B	H	A	A	A	H	-	B	B	A
T/G	Ps109507	B	B	H	A	A	A	H	B	A	A	A	H	B	B	B	H	A	B	B	A
A/G	Ps109708	B	B	-	A	A	A	H	B	B	B	B	H	A	A	A	H	B	B	B	A
C/T	Ps109799	B	B	H	A	A	A	A	A	A	A	A	A	A	A	A	A	A	A	A	A
A/C	Ps109855	B	B	H	A	A	A	H	H	A	A	A	H	B	B	B	B	B	B	B	A
T/G	Ps109909	B	B	H	A	A	A	A	A	B	B	B	B	B	B	B	B	B	B	B	A
A/G	Ps109910	B	B	H	A	A	A	H	H	B	B	B	H	A	A	A	H	B	B	B	A
A/G	Ps110001	B	B	H	A	A	A	H	B	B	B	B	H	A	A	A	A	A	B	B	A
C/T	Ps110021	B	B	H	A	A	A	H	B	A	A	A	H	B	B	B	H	A	B	B	A
C/T	Ps110077	B	B	H	A	A	A	A	A	A	A	A	H	B	B	B	H	A	A	A	H
C/T	Ps110082	B	B	H	A	A	A	-	-	-	B	B	-	A	A	A	A	A	B	B	A
C/T	Ps110093	B	B	H	A	A	A	A	A	A	A	A	H	B	B	B	H	A	A	A	B
C/T	Ps110094	B	B	H	A	A	A	H	B	A	A	A	A	A	A	A	H	B	A	A	A
A/G	Ps110121	B	B	H	A	A	A	A	A	A	A	A	A	A	A	A	A	A	B	B	A
A/G	Ps110186	B	B	H	A	A	A	H	B	B	B	B	H	A	A	A	A	A	B	B	A
A/G	Ps110201	B	B	H	A	A	A	H	B	B	B	B	H	A	A	A	A	A	B	B	A
A/G	Ps110223	B	B	H	A	A	A	H	B	B	B	B	B	B	B	B	A	A	B	B	A
A/G	Ps110240	B	B	H	A	A	A	A	A	B	B	B	B	B	B	B	B	B	B	B	B
A/T	Ps110285	B	B	H	A	A	A	A	A	-	B	B	B	B	B	B	B	B	B	B	A
A/C	Ps110297	B	B	H	A	A	A	H	B	B	B	B	-	A	A	A	H	B	B	B	A
C/G	Ps110424	B	B	H	A	A	A	H	B	A	A	A	-	B	B	B	H	A	B	B	A
T/G	Ps110455	B	B	H	A	A	A	A	-	B	B	B	H	A	A	A	A	A	B	B	A
A/G	Ps110456	B	B	-	A	A	A	A	A	B	B	B	-	A	A	A	H	B	B	B	A
A/G	Ps110609	B	B	H	A	A	A	A	A	A	A	A	H	B	B	B	H	A	A	A	A
A/C	Ps110617	B	B	H	A	A	A	H	-	B	B	B	H	A	A	A	A	A	B	B	A
A/G	Ps110653	B	B	H	A	A	A	-	B	-	-	-	B	B	B	B	B	B	B	B	B
A/G	Ps110669	B	B	-	A	A	A	A	A	A	A	A	A	A	A	A	H	B	A	A	-
C/T	Ps110789	B	B	H	A	A	A	A	-	B	B	B	B	B	B	B	B	B	B	B	A
C/G	Ps110828	B	B	H	A	A	A	H	B	B	B	B	B	B	B	B	H	A	B	B	A
T/G	Ps110837	B	B	H	A	A	A	-	H	B	B	B	B	B	B	B	B	B	B	B	A
A/G	Ps110867	B	B	H	A	A	A	H	B	A	A	A	H	B	B	B	B	B	A	A	A
C/T	Ps110954	B	B	H	A	A	A	A	B	B	B	B	H	A	A	A	H	B	B	B	A
C/T	Ps111007	B	B	H	A	A	A	H	B	B	B	B	H	A	A	A	A	A	B	B	A
A/G	Ps111111	B	B	H	A	A	A	H	B	A	A	A	H	B	B	B	H	A	A	A	B
C/T	Ps111129	B	B	H	A	A	A	H	B	B	B	B	-	B	B	B	H	A	B	B	A
T/G	Ps111175	B	B	H	A	A	A	H	H	B	B	B	B	B	B	B	B	B	B	B	A
C/T	Ps111293	B	B	H	A	A	A	H	B	B	B	B	H	A	A	A	A	A	B	B	A
C/T	Ps111307	B	B	H	A	A	A	A	A	A	A	A	A	A	A	A	A	A	B	B	A
A/G	Ps111348	B	B	H	A	A	A	H	B	B	B	B	H	A	A	A	H	B	B	B	A
C/T	Ps111545	B	B	H	A	A	A	A	A	B	-	B	H	A	A	A	A	A	B	B	A
C/T	Ps111568	B	B	H	A	A	A	A	A	A	A	A	A	A	A	A	A	A	A	A	A
T/G	Ps111669	B	B	H	A	A	A	A	A	A	A	A	A	A	A	A	A	A	B	B	A
A/T	Ps111681	B	B	H	A	A	A	A	-	B	B	B	H	A	A	A	H	B	B	B	A
C/T	Ps111817	B	B	H	A	A	A	A	-	B	B	B	B	B	B	B	H	A	B	B	A
A/G	Ps111823	B	B	H	A	A	A	H	B	B	B	B	B	B	B	-	H	A	B	B	A
A/G	Ps111879	B	B	H	A	A	A	-	B	B	B	B	B	B	B	B	B	B	B	B	A
C/T	Ps111960	B	B	H	A	A	A	H	B	B	B	B	H	A	A	A	H	B	B	B	A
A/T	Ps112024	B	B	H	A	A	A	A	A	B	B	B	H	A	A	A	A	A	B	B	A
C/G	Ps112141	B	B	H	A	A	A	A	A	B	B	B	H	A	A	A	A	A	B	B	A
A/C	Ps112146	B	B	-	A	A	A	H	B	A	A	A	H	B	B	B	H	A	B	B	A
A/G	Ps112218	B	B	H	A	A	-	H	-	B	B	B	H	A	A	A	H	B	B	B	A
T/G	Ps112270	B	B	H	A	A	A	H	B	B	B	B	H	A	A	A	A	A	B	B	A
A/C	Ps112294	B	B	H	A	A	A	A	A	B	B	B	B	B	B	B	H	A	B	B	A
A/G	Ps112303	B	B	H	A	A	A	H	B	B	B	B	B	B	B	B	H	A	B	B	A
A/T	Ps112320	B	B	H	A	A	A	H	B	B	B	B	H	A	A	A	A	A	B	B	A
A/G	Ps112334	B	B	H	A	A	A	H	B	B	B	B	B	B	B	B	H	A	B	B	A
C/T	Ps112388	B	B	H	A	A	A	A	A	B	B	B	B	B	B	B	B	B	B	B	A
C/T	Ps112408	B	B	H	A	A	A	H	H	B	B	B	H	A	A	A	H	B	B	B	A
A/G	Ps112412	B	B	H	A	A	A	H	-	B	B	B	B	B	B	B	H	A	B	B	A
A/G	Ps112567	B	B	H	A	A	A	A	A	B	B	B	B	B	B	B	B	B	B	B	A
A/T	Ps112573	B	B	H	A	A	A	H	-	B	B	B	-	A	A	A	A	A	B	B	A
C/T	Ps112681	B	B	H	A	A	A	H	-	B	B	B	B	B	B	B	H	A	B	B	A
A/T	Ps112686	B	B	H	A	A	A	H	B	B	B	B	H	A	A	A	A	A	B	B	B
C/G	Ps112692	B	B	H	A	A	A	-	A	A	A	A	H	B	B	B	H	A	B	B	A
A/C	Ps112749	B	B	H	A	A	A	A	-	B	B	B	B	B	B	B	H	A	B	B	A
C/T	Ps112781	B	B	H	A	A	A	H	B	B	B	B	B	B	B	B	H	A	B	B	B
C/T	Ps112806	B	B	H	A	A	A	H	B	B	B	B	B	B	-	B	B	B	B	B	A
C/T	Ps112898	B	B	H	A	A	A	H	B	B	B	B	B	B	B	B	H	A	B	B	A
A/T	Ps112927	B	B	H	A	A	A	A	A	B	B	B	H	A	A	A	A	A	B	B	A
A/G	Ps112981	B	B	H	A	A	A	A	A	B	B	B	H	A	A	A	-	-	B	B	A
T/G	Ps113246	B	B	-	A	A	A	A	A	B	B	B	H	A	A	A	A	A	B	B	A
A/T	Ps113270	B	B	H	A	A	A	H	H	B	B	B	H	A	A	A	H	B	B	B	A
C/T	Ps113378	B	B	-	A	A	A	H	B	B	B	B	H	A	A	A	H	B	B	B	A
C/T	Ps113393	B	B	-	A	A	A	H	B	B	B	B	B	B	B	B	B	B	B	B	A
A/T	Ps113402	B	B	H	A	A	A	A	A	A	A	A	A	A	A	A	A	A	A	A	A
A/G	Ps113452	B	B	H	A	A	A	A	A	B	B	B	H	A	A	A	H	B	B	B	A
T/G	Ps113489	B	B	H	A	A	A	H	B	B	B	B	H	A	A	A	-	B	B	B	A
A/G	Ps113505	B	B	H	A	A	A	H	B	B	B	B	B	B	B	B	B	B	B	B	A
C/T	Ps113510	B	B	H	A	A	A	H	-	A	A	A	B	B	B	B	B	B	B	B	A
A/G	Ps113599	B	B	H	A	A	A	H	B	B	B	B	B	B	B	B	H	A	B	B	A
C/T	Ps113777	B	B	-	A	A	A	A	A	A	A	A	A	A	A	A	A	A	A	A	A
A/T	Ps113778	B	B	H	A	A	A	H	B	A	A	A	H	B	B	B	H	A	A	A	A
C/T	Ps113779	B	B	H	A	A	A	A	-	-	B	B	B	B	B	B	H	A	B	B	A
A/G	Ps113842	B	B	H	A	A	A	H	B	B	B	B	H	A	A	A	H	B	B	B	A
C/T	Ps113988	B	B	H	A	A	A	H	B	B	B	B	B	B	B	B	H	A	B	B	A
T/G	Ps113990	B	B	H	A	A	A	A	B	B	B	B	H	A	A	A	H	B	B	B	A
A/G	Ps114007	B	B	H	A	A	A	H	H	B	B	B	H	A	A	A	H	B	B	B	A
A/G	Ps114008	B	B	H	A	A	A	H	B	B	B	B	B	B	B	B	B	B	B	B	A
A/G	Ps114333	B	B	H	A	A	A	H	-	B	B	B	H	A	A	A	A	A	B	B	A
A/G	Ps114369	B	B	H	A	A	A	H	B	B	B	B	H	A	A	A	H	B	B	B	A
A/G	Ps114463	B	B	H	A	A	A	H	B	B	B	B	B	B	B	B	H	A	B	B	A
A/G	Ps114617	B	B	H	A	A	A	A	A	B	B	B	H	A	A	A	A	A	B	B	A
A/G	Ps114865	B	B	H	A	A	A	-	-	B	B	B	B	B	B	B	H	A	B	B	A
A/G	Ps114914	B	B	H	A	A	A	A	A	B	B	B	H	A	A	A	H	B	B	B	A
A/C	Ps115178	B	B	H	A	A	A	A	A	A	A	A	H	B	B	B	H	A	B	B	A
A/T	Ps115232	B	B	H	A	A	A	A	A	B	B	B	H	A	A	A	H	B	B	B	A
A/C	Ps115235	B	B	H	A	A	A	H	B	B	B	B	H	A	A	A	H	B	B	B	A
A/G	Ps115304	B	B	-	A	A	A	A	A	B	B	B	H	A	A	A	A	A	A	A	A
C/T	Ps115330	B	B	H	A	A	A	A	A	A	A	A	H	B	B	B	H	A	B	B	A
A/G	Ps115349	B	B	H	A	A	A	A	A	B	B	B	H	A	A	A	H	B	B	B	A
A/C	Ps115413	B	B	H	A	A	A	-	B	B	B	B	H	A	A	A	A	A	B	B	A
C/G	Ps115429	B	B	-	A	A	A	A	A	A	A	A	A	A	A	A	A	A	A	A	A
A/G	Ps115506	B	B	H	A	A	A	H	B	B	B	B	B	B	B	B	B	B	B	B	B
C/T	Ps115588	B	B	H	A	A	A	A	A	B	B	B	H	A	A	A	A	A	B	B	A
A/C	Ps115599	B	B	H	A	A	A	H	B	B	B	B	B	B	B	B	H	A	B	B	A
A/G	Ps115663	B	B	H	A	A	A	H	B	B	B	B	H	A	A	A	H	B	B	B	A
A/C	Ps115675	B	B	H	A	A	A	-	A	A	A	A	H	B	B	B	H	A	B	B	A
A/T	Ps115730	B	B	H	A	A	A	H	B	B	B	B	H	A	A	A	H	B	B	B	A
T/G	Ps115766	B	B	H	A	A	A	A	A	A	A	A	A	A	A	A	A	A	A	A	A
A/G	Ps115795	B	B	-	A	A	A	A	A	A	A	A	A	A	A	A	A	A	A	A	H
A/G	Ps116059	B	B	H	A	A	A	A	A	A	A	A	H	B	B	B	H	A	A	A	B
A/G	Ps116119	B	B	H	A	A	A	A	A	B	B	B	H	A	A	A	H	B	B	B	A
A/G	Ps116163	B	B	H	A	A	A	A	A	A	A	A	H	B	B	B	H	A	A	A	A
C/T	Ps116211	B	B	H	A	A	A	H	B	B	B	B	H	A	A	A	H	B	B	B	A
C/T	Ps116219	B	B	H	A	A	A	A	A	B	B	B	B	B	B	B	H	A	A	A	H
A/C	Ps116316	B	B	H	A	A	A	H	B	B	B	B	H	A	A	A	H	B	B	B	A
T/G	Ps116638	B	B	H	A	A	A	H	B	A	A	A	H	B	B	B	H	A	-	-	A
C/T	Ps116642	B	B	H	A	A	A	A	A	A	A	A	A	A	A	A	A	A	A	A	A
C/T	Ps116715	B	B	H	A	A	A	H	-	B	B	B	H	A	A	A	H	B	B	B	B
A/G	Ps116769	B	B	-	A	A	A	H	B	B	B	B	H	A	A	A	H	B	B	B	A
T/G	Ps116989	B	B	H	A	A	A	H	B	B	B	B	B	B	B	B	H	A	B	B	A
C/T	Ps116992	B	B	-	A	A	A	A	A	B	B	B	H	A	A	A	A	A	A	A	A
T/G	Ps117103	B	B	H	A	A	A	A	A	B	B	B	H	A	A	A	H	B	B	B	A
A/C	Ps117338	B	B	H	A	A	A	H	-	B	B	B	H	A	A	A	-	-	B	B	A
C/T	Ps117406	B	B	H	A	A	A	H	B	B	B	B	H	A	A	A	A	A	B	B	A
C/T	Ps117512	B	B	-	A	A	A	A	A	B	B	B	H	A	A	A	H	B	B	B	A
A/G	Ps117529	B	B	H	A	A	A	-	B	B	B	B	B	B	B	B	B	B	B	B	A
A/G	Ps117544	B	B	H	A	A	A	H	B	B	B	B	B	B	B	B	B	B	B	B	A
C/T	Ps117578	B	B	-	A	A	A	H	B	B	B	B	B	A	A	A	B	B	B	B	A
A/C	Ps117580	B	B	H	A	A	A	H	B	B	B	B	H	A	A	A	A	A	B	B	A
C/T	Ps117648	B	B	H	A	A	A	H	B	B	B	B	H	A	A	A	A	A	B	B	A
C/T	Ps117712	B	B	H	A	A	A	H	B	A	A	A	H	B	B	B	H	A	B	B	A
A/G	Ps117733	B	B	H	A	A	A	H	B	B	B	B	H	A	A	A	H	B	B	B	A
C/T	Ps117783	B	B	-	A	A	A	H	B	B	B	B	B	B	B	B	H	A	B	B	B
A/G	Ps117919	B	B	H	A	A	A	H	B	B	B	B	H	A	A	A	H	B	B	B	B
A/G	Ps117934	B	B	H	A	A	A	A	A	B	B	B	H	A	A	A	A	A	B	B	A
A/G	Ps117947	B	B	H	A	A	A	A	A	-	B	B	H	A	A	A	A	A	B	B	A
A/G	Ps117995	B	B	-	A	A	A	A	A	A	A	A	A	-	-	-	A	A	A	A	A
A/T	Ps118016	B	B	H	A	A	A	-	B	-	B	B	H	A	A	A	A	A	B	B	A
C/T	Ps118030	B	B	H	A	A	A	H	B	B	B	B	B	B	B	B	H	A	B	B	A
A/G	Ps118038	B	B	H	A	A	A	H	B	B	B	B	B	B	B	B	H	A	B	B	A
A/G	Ps118291	B	B	-	A	A	A	H	B	B	B	B	H	A	A	A	H	B	A	A	B
C/G	Ps118506	B	B	H	A	A	A	H	B	B	B	B	B	B	B	B	B	B	B	B	A
A/C	Ps118566	B	B	H	A	A	A	H	B	B	B	B	B	B	B	B	H	A	B	B	A
C/G	Ps118585	B	B	H	A	A	A	H	B	B	B	B	B	B	B	B	H	A	B	B	A
C/T	Ps118634	B	B	H	A	A	A	A	A	B	B	B	B	B	B	B	H	A	B	B	A
T/G	Ps118749	B	B	H	A	A	A	H	-	A	A	A	H	B	B	B	H	A	B	B	A
A/T	Ps118750	B	B	H	A	A	A	A	A	B	B	B	H	A	A	A	H	B	B	B	A
C/T	Ps118768	B	B	H	A	A	A	H	B	A	A	A	H	B	B	B	B	B	B	B	B
C/T	Ps118776	B	B	H	A	A	A	H	B	B	B	B	H	A	A	A	A	A	B	B	A
A/T	Ps118920	B	B	H	A	A	A	H	B	A	A	A	H	B	B	B	H	A	B	B	A
A/G	Ps118927	B	B	H	A	A	A	A	A	A	A	A	A	A	A	A	A	A	A	A	A
T/G	Ps119053	B	B	H	A	A	A	A	A	A	A	A	A	A	A	A	A	A	A	A	B
C/T	Ps119072	B	B	H	A	A	A	H	-	A	A	A	H	B	B	B	H	A	A	A	B
A/G	Ps119093	B	B	H	A	A	A	-	A	A	A	A	H	B	B	B	H	A	B	B	A
A/T	Ps119102	B	B	-	A	A	A	-	B	B	B	B	B	B	B	B	B	B	B	B	A
C/G	Ps119276	B	B	H	A	A	A	A	A	B	B	B	B	B	B	B	B	B	B	B	A
A/G	Ps119277	B	B	H	A	A	A	A	-	A	A	A	H	B	B	B	H	A	B	B	A
C/T	Ps119301	B	B	H	A	A	A	H	B	B	B	B	B	B	B	B	B	B	B	B	A
C/T	Ps119345	B	B	H	A	A	A	H	B	B	B	B	H	A	A	A	H	B	B	B	A
A/T	Ps119434	B	B	-	A	A	A	H	B	B	B	B	H	A	A	A	A	A	B	B	A
T/G	Ps119732	B	B	H	A	A	A	A	A	B	B	B	B	B	B	B	H	A	A	A	A
C/G	Ps119772	B	B	H	A	A	A	A	-	B	B	B	H	A	A	A	H	B	B	B	B
A/G	Ps119924	B	B	H	A	A	A	H	B	B	B	B	B	B	B	B	B	B	B	B	A
A/T	Ps120008	B	B	-	A	A	A	H	B	B	B	B	-	A	A	A	A	A	B	B	A
T/G	Ps120017	B	B	H	A	A	A	A	A	B	B	B	H	A	A	A	A	A	B	B	A
A/G	Ps120041	B	B	H	A	A	A	H	B	B	B	-	H	A	A	A	A	A	B	B	A
A/T	Ps120103	B	B	H	A	A	A	H	B	B	B	B	H	A	A	A	A	A	B	B	A
A/T	Ps120151	B	B	H	A	A	A	H	-	B	B	B	H	A	A	A	A	A	B	B	A
C/G	Ps120169	B	B	H	A	A	A	-	-	B	B	B	H	A	A	A	H	B	B	B	A
C/T	Ps120192	B	B	H	A	A	A	A	A	A	A	A	H	B	B	B	H	A	A	A	A
A/C	Ps120228	B	B	H	A	A	A	A	-	B	B	B	B	B	B	B	H	A	B	B	A
A/G	Ps120281	B	B	H	A	A	A	-	B	B	B	B	B	B	B	B	B	B	B	B	B
A/C	Ps120288	B	B	H	A	A	A	A	A	B	B	B	B	B	B	B	B	B	B	B	A
A/G	Ps120292	B	B	H	A	A	A	H	B	B	B	B	B	B	B	B	H	A	-	B	A
C/T	Ps120419	B	B	-	A	A	A	H	B	B	B	B	H	A	A	A	A	A	B	B	A
C/G	Ps120430	B	B	H	A	A	A	H	B	B	B	B	H	A	A	A	A	A	B	B	B
T/G	Ps120465	B	B	H	A	A	A	H	B	A	A	A	H	B	B	B	H	A	B	B	A
C/T	Ps120524	B	B	H	A	A	A	H	-	B	B	B	H	A	A	A	A	A	B	B	A
A/T	Ps120567	B	B	-	A	A	A	H	B	B	B	B	H	A	A	A	A	A	B	B	A
A/G	Ps120576	B	B	H	A	A	A	A	A	B	B	B	H	A	A	A	H	B	B	B	A
A/T	Ps120613	B	B	H	A	A	A	H	B	B	B	B	B	B	B	B	B	B	B	B	A
A/G	Ps120662	B	B	H	A	A	A	H	B	B	B	B	B	B	B	B	H	A	B	B	A
A/C	Ps120693	B	B	H	A	A	A	A	A	B	B	B	B	B	B	B	H	A	B	B	B
A/G	Ps120750	B	B	H	A	A	A	H	H	B	B	B	H	A	A	A	H	B	B	B	A
C/T	Ps120930	B	B	H	H	A	A	A	A	A	A	A	A	A	A	A	A	A	B	B	A
T/G	Ps121052	B	B	H	A	A	A	H	B	A	A	A	H	B	B	B	H	A	A	A	B
A/G	Ps121107	B	B	H	A	A	A	A	-	B	B	B	H	A	A	A	A	A	B	B	A
A/G	Ps121108	B	B	H	A	A	A	A	A	B	B	B	H	A	A	A	H	B	B	B	A
A/G	Ps121268	B	B	H	A	A	A	H	-	B	B	B	H	A	A	A	H	B	B	B	B
A/G	Ps121438	B	B	H	A	A	A	H	B	B	B	B	B	B	B	B	H	A	B	B	A
A/G	Ps121467	B	B	H	A	A	A	H	B	B	B	B	B	B	B	B	H	A	B	B	A
A/G	Ps121520	B	B	H	A	A	A	A	A	A	A	A	A	A	A	A	A	A	A	A	A
C/T	Ps121600	B	B	-	A	A	A	H	B	B	B	B	H	A	A	A	A	A	B	B	A
A/T	Ps121622	B	B	H	A	A	A	H	B	A	A	A	A	A	A	A	A	A	A	A	A
A/G	Ps121637	B	B	-	A	A	A	A	A	B	B	B	H	A	A	A	A	A	B	B	A
T/G	Ps121729	B	B	H	A	A	A	A	A	B	B	B	H	A	A	A	H	B	B	B	A
C/T	Ps121784	B	B	H	A	A	A	H	B	B	B	B	H	A	A	A	H	B	B	B	A
C/T	Ps121886	B	B	H	A	A	A	H	B	B	B	B	B	B	B	B	B	B	B	B	B
A/C	Ps121905	B	B	H	A	A	A	H	B	A	A	A	H	B	B	B	B	B	A	A	A
A/G	Ps121916	B	B	H	A	A	A	H	B	B	B	B	H	A	A	A	A	A	B	B	A
A/T	Ps121979	B	B	H	A	A	A	A	A	B	B	B	B	B	B	B	H	A	B	B	A
C/T	Ps121982	B	B	H	A	A	A	H	B	B	B	B	H	A	A	A	A	A	B	B	B
C/T	Ps122026	B	B	-	A	A	A	A	A	B	B	B	H	A	A	A	H	B	B	B	A
C/T	Ps122045	B	B	H	A	A	A	A	A	B	B	B	H	A	A	A	A	A	B	B	A
A/G	Ps122047	B	B	H	A	A	A	A	-	B	B	B	B	B	B	B	H	A	B	B	A
A/G	Ps122410	B	B	H	A	A	A	H	B	B	B	B	H	A	A	A	H	B	B	B	A
C/T	Ps122452	B	B	H	A	A	A	A	A	A	A	A	A	A	A	A	A	A	A	A	A
C/T	Ps122510	B	B	H	A	A	A	H	-	B	B	B	H	A	A	A	A	A	B	B	A
A/G	Ps122639	B	B	H	A	A	A	H	B	A	A	A	-	B	B	B	H	A	B	B	A
A/G	Ps122666	B	B	H	A	A	A	A	A	B	B	B	H	A	A	A	H	B	B	B	A
A/G	Ps122708	B	B	H	A	A	A	H	B	B	B	B	H	A	A	A	A	A	B	B	A
A/G	Ps122710	B	B	H	A	A	A	H	B	A	A	A	H	B	B	B	B	B	A	A	B
A/C	Ps122808	B	B	H	A	A	A	A	A	B	B	B	H	A	A	A	H	B	B	B	A
C/T	Ps122998	B	B	H	A	A	A	H	-	B	B	B	B	B	B	B	H	A	B	B	A
A/C	Ps123131	B	B	H	A	A	A	-	H	B	B	B	H	A	A	A	H	B	B	B	A
C/G	Ps123139	B	B	H	A	A	A	H	B	B	B	B	H	A	A	A	H	B	B	B	A
C/T	Ps123153	B	B	H	A	A	A	A	A	A	A	A	A	A	A	A	A	A	A	A	A
A/T	Ps123374	B	B	H	A	A	A	H	B	B	B	B	H	A	A	A	H	B	B	B	A
A/G	Ps123535	B	B	H	A	A	A	A	A	A	A	A	A	A	A	A	H	B	A	A	B
A/G	Ps123567	B	B	H	A	A	A	A	A	A	A	A	H	B	B	B	H	A	A	A	B
C/T	Ps123606	B	B	H	A	A	A	H	B	B	B	B	H	A	A	A	H	B	B	B	A
A/G	Ps123768	B	B	H	A	A	A	H	B	A	A	A	H	B	B	B	H	A	B	B	A
A/T	Ps123781	B	B	H	A	A	A	H	B	B	B	B	H	A	A	A	H	B	B	B	A
A/C	Ps123906	B	B	H	A	A	A	A	A	B	B	B	B	B	B	B	B	B	B	B	A
A/G	Ps123932	B	B	H	A	A	A	H	B	B	B	B	B	B	B	B	B	B	B	B	A
C/T	Ps123982	B	B	H	A	A	A	A	A	B	B	B	H	A	A	A	A	A	B	B	A
A/G	Ps124040	B	B	H	A	A	A	H	B	B	B	B	H	A	A	A	H	B	B	B	A
A/G	Ps124058	B	B	B	-	-	-	-	A	B	B	B	B	-	-	-	-	-	B	B	-
A/T	Ps124060	B	B	H	A	A	A	H	B	B	B	B	H	A	A	A	A	A	B	B	A
C/T	Ps124063	B	B	H	A	A	A	H	B	A	A	A	A	A	A	A	H	B	B	B	A
C/T	Ps124082	B	B	H	A	A	A	H	B	B	B	B	H	A	A	A	A	A	B	B	A
A/G	Ps124189	B	B	-	A	A	A	H	B	A	A	A	A	A	A	A	A	A	B	B	A
C/T	Ps124241	B	B	H	A	A	A	A	A	B	B	B	B	B	B	B	B	B	B	B	B
A/G	Ps124242	B	B	H	A	A	A	A	A	B	B	B	H	A	A	A	H	B	B	B	A
A/T	Ps124285	B	B	H	A	A	A	H	B	A	A	A	H	B	B	B	H	-	A	A	B
A/T	Ps124321	B	B	H	A	A	A	A	A	B	B	B	H	A	A	A	H	B	B	B	A
T/G	Ps124332	B	B	H	A	A	A	H	B	A	A	A	H	B	B	B	H	A	A	A	A
C/T	Ps124377	B	B	H	A	A	A	H	-	B	B	B	H	A	A	A	H	B	B	B	B
A/C	Ps124828	B	B	H	A	A	A	H	B	A	A	A	H	B	B	B	H	A	A	A	B
A/G	Ps124832	B	B	H	A	A	A	A	A	B	B	B	H	A	A	A	H	B	B	B	A
A/G	Ps125012	B	B	-	A	A	A	A	A	B	B	B	H	A	A	A	H	B	B	B	A
T/G	Ps125091	B	B	H	A	A	A	H	B	B	B	B	B	B	B	B	B	B	B	B	A
T/G	Ps125112	B	B	H	A	A	A	H	B	-	A	A	H	B	B	B	H	A	A	A	A
A/G	Ps125170	B	B	H	A	A	A	H	B	B	B	B	H	A	A	A	A	A	B	B	A
A/T	Ps125247	B	B	H	A	A	A	H	B	A	A	A	A	A	A	A	A	A	A	A	A
A/T	Ps125382	B	B	H	A	A	A	H	-	A	A	A	H	B	B	B	H	A	A	A	A
C/G	Ps125474	B	B	H	A	A	A	A	A	B	B	B	H	A	A	A	H	B	B	B	A
A/G	Ps125475	B	B	H	A	A	A	A	A	B	B	B	H	A	A	A	H	B	B	B	A
A/C	Ps125483	B	B	H	A	A	A	H	B	B	B	B	H	A	A	A	H	B	B	B	A
C/T	Ps125583	B	B	-	A	A	A	A	A	B	B	B	H	A	A	A	A	A	B	B	A
A/G	Ps125587	B	B	H	A	A	A	A	-	B	B	B	B	B	B	B	H	A	B	B	A
A/G	Ps125608	B	B	H	A	A	A	H	B	B	B	B	B	B	B	B	B	B	B	B	A
A/G	Ps125610	B	B	H	A	A	A	H	-	B	B	B	H	A	A	A	H	B	B	B	B
A/G	Ps125650	B	B	H	-	A	A	A	A	B	B	B	H	A	A	A	A	A	B	B	A
C/T	Ps125671	B	B	H	A	A	A	H	-	A	A	A	A	A	A	A	A	A	A	A	A
C/T	Ps125768	B	B	-	A	A	A	H	B	B	B	B	H	A	A	A	A	A	B	B	A
C/T	Ps125871	B	-	H	A	A	A	-	-	B	B	B	H	A	A	A	H	B	A	A	B
A/G	Ps126209	B	B	H	A	A	A	H	B	A	A	A	A	A	A	A	H	B	A	A	A
A/G	Ps126239	B	B	H	A	A	A	H	B	B	B	B	B	B	B	B	H	A	B	B	A
A/G	Ps126256	B	B	-	A	A	A	-	H	B	B	B	B	B	B	B	H	A	B	B	A
A/G	Ps126285	B	B	-	A	A	A	H	B	B	B	B	B	B	B	B	B	B	B	B	A
A/G	Ps126295	B	B	H	A	A	A	H	B	B	B	B	B	B	B	B	B	B	B	B	A
A/G	Ps126522	B	B	H	A	A	A	A	A	B	B	B	H	A	A	A	H	B	B	B	A
C/T	Ps126629	B	B	H	A	A	A	H	B	B	B	B	H	A	A	A	H	B	B	B	A
T/G	Ps126650	B	B	H	A	A	A	A	H	B	B	B	H	A	A	A	A	A	B	B	A
A/G	Ps126734	B	B	H	A	A	A	H	H	B	B	B	H	A	A	A	H	B	B	B	A
A/G	Ps126767	B	B	H	A	A	A	H	B	A	A	A	H	B	B	B	H	A	B	B	A
C/T	Ps126895	B	B	H	A	A	A	H	B	A	A	A	B	B	B	B	B	A	A	A	A
T/G	Ps126943	B	B	-	A	A	A	H	B	B	B	B	H	A	A	A	A	A	B	B	A
C/T	Ps126981	B	B	H	A	A	A	H	B	B	B	B	H	A	A	A	H	B	B	B	A
A/G	Ps126996	B	B	H	A	A	A	A	A	B	B	B	B	B	B	B	B	B	B	B	A
C/T	Ps127003	B	B	H	A	A	A	H	B	A	A	A	H	B	B	B	H	A	A	A	A
C/G	Ps127016	B	B	-	A	A	A	A	A	A	A	A	A	A	A	A	A	A	B	B	A
C/T	Ps127045	B	B	H	A	A	A	H	B	A	A	A	H	B	B	B	B	B	B	B	A
A/C	Ps127127	B	B	H	A	A	A	-	H	B	B	B	B	B	B	B	H	H	B	B	A
A/G	Ps127129	B	B	H	A	A	A	H	B	B	B	B	H	A	A	A	H	B	B	B	A
A/G	Ps127145	B	B	B	-	-	-	B	B	B	B	B	B	-	-	-	-	-	B	B	-
T/G	Ps127154	B	B	H	A	A	A	H	B	B	B	B	H	A	A	A	H	B	B	B	B
A/G	Ps127185	B	B	H	A	A	A	A	A	A	A	A	H	B	B	B	H	A	A	A	A
T/G	Ps127335	B	B	H	A	A	A	A	A	B	B	B	H	A	A	A	H	B	B	B	A
A/T	Ps127351	B	B	H	A	A	A	A	A	B	B	B	H	A	A	A	A	A	B	B	A
C/G	Ps127357	B	B	-	A	A	A	H	-	B	B	B	H	A	A	A	A	A	B	B	A
C/T	Ps127359	B	B	H	A	A	A	A	A	B	B	B	H	A	A	A	A	A	B	B	A
A/C	Ps127422	B	B	H	A	A	A	A	A	B	B	B	H	A	A	A	H	B	B	B	B
A/C	Ps127456	B	B	H	A	A	A	H	-	B	B	B	H	A	A	A	A	A	B	B	A
C/T	Ps127653	B	B	H	A	A	A	A	A	B	B	B	B	B	B	B	-	A	B	B	A
C/T	Ps127675	B	B	H	A	A	A	H	B	B	B	B	H	A	A	A	H	B	B	B	A
C/T	Ps127689	B	B	H	A	A	A	H	B	B	B	B	H	A	A	A	H	B	B	B	A
A/T	Ps127697	B	B	H	A	A	A	A	A	B	B	B	B	B	B	B	H	A	B	B	A
A/T	Ps127752	B	B	H	A	A	A	A	A	B	B	B	H	A	A	A	H	B	B	B	A
C/T	Ps128203	B	B	H	A	A	A	H	H	B	B	B	H	A	A	A	H	B	B	B	A
C/G	Ps128263	B	B	H	A	A	A	H	B	A	A	A	H	B	B	B	H	A	B	B	A
A/G	Ps128292	B	B	H	A	-	A	-	-	-	-	-	A	A	A	A	A	A	A	A	A
A/G	Ps128294	B	B	H	A	A	A	-	B	B	B	B	H	A	A	A	H	B	B	B	A
A/G	Ps128398	B	B	H	A	A	A	H	B	A	A	A	A	A	A	A	A	A	A	A	A
A/G	Ps128477	B	B	H	A	A	A	H	B	B	B	B	B	B	B	B	B	B	B	B	A
A/G	Ps128667	B	B	H	A	A	A	A	-	B	B	B	B	B	B	B	H	A	B	B	A
C/T	Ps128703	B	B	H	A	A	A	A	A	B	B	B	H	A	A	A	A	A	B	B	A
C/T	Ps128837	B	B	H	A	A	A	H	B	B	B	B	B	B	B	B	H	A	B	B	A
A/G	Ps128889	B	B	H	A	A	A	H	B	B	B	B	B	-	B	B	B	B	B	B	B
A/C	Ps129118	B	B	H	A	A	A	-	B	B	B	B	H	A	A	A	A	A	B	B	A
T/G	Ps129271	B	B	-	A	A	A	H	-	B	B	B	B	B	B	B	B	B	B	B	A
C/T	Ps129290	B	B	H	A	A	A	-	H	A	A	A	H	B	B	B	H	A	B	B	-
A/T	Ps129315	B	B	H	A	A	A	A	A	B	B	B	H	A	A	A	A	A	B	B	A
C/G	Ps129342	B	B	H	A	A	A	H	-	B	B	B	B	B	B	B	B	B	B	B	A
A/G	Ps129589	B	B	H	A	A	A	H	B	B	B	B	H	A	A	A	H	B	B	B	A
C/T	Ps129675	B	B	H	A	A	A	H	B	A	A	A	-	B	B	B	H	A	B	B	A
C/T	Ps129683	B	B	H	A	A	A	A	A	B	B	B	H	A	A	A	A	A	B	B	A
A/T	Ps129767	B	B	-	A	A	A	A	A	A	A	A	A	A	A	A	A	A	A	A	A
A/C	Ps129908	B	B	H	A	A	A	A	A	B	B	B	H	A	A	A	A	A	B	B	A
A/G	Ps129933	B	B	H	A	A	A	H	B	B	B	B	H	A	A	A	A	A	B	B	A
A/G	Ps129936	B	B	H	A	A	A	H	B	B	B	B	B	-	-	-	A	A	B	B	A
A/G	Ps129945	B	B	H	A	A	A	H	-	B	B	B	H	A	A	A	H	B	B	B	A
A/G	Ps129977	B	B	H	A	A	A	A	B	B	B	B	B	B	B	B	B	B	B	B	A
A/C	Ps130008	B	B	-	A	A	A	H	-	A	A	A	A	A	A	A	A	A	B	B	A
C/T	Ps130039	B	B	-	A	A	A	A	A	B	B	B	H	A	A	A	H	B	B	B	B
T/G	Ps130064	B	B	H	A	A	A	H	B	A	A	A	H	B	B	B	B	B	B	B	A
C/T	Ps130087	B	B	H	A	A	A	H	B	B	B	B	B	B	B	B	H	A	B	B	A
A/T	Ps130096	B	B	H	A	A	A	H	B	B	B	B	H	A	A	A	A	A	B	B	A
C/T	Ps130097	B	B	H	A	A	A	H	B	A	A	A	H	B	B	B	H	A	B	B	A
A/G	Ps130123	B	B	H	A	A	A	H	B	B	B	B	H	A	A	A	H	B	B	B	A
A/C	Ps130143	B	B	H	A	A	A	-	B	B	B	B	B	B	B	B	B	B	B	B	A
C/T	Ps130159	B	B	H	A	A	A	A	A	B	B	B	B	B	B	B	H	A	B	B	B
C/T	Ps130195	B	B	H	A	A	A	A	A	B	B	B	H	A	A	A	A	A	A	A	A
A/G	Ps130258	B	B	H	A	A	A	H	B	B	B	B	H	A	A	A	H	B	A	A	B
C/T	Ps130309	B	B	H	A	A	A	A	A	A	A	A	A	A	A	A	H	B	B	B	A
A/G	Ps130323	B	B	-	A	A	A	-	A	B	B	B	H	A	A	A	H	B	B	B	A
A/G	Ps130328	B	B	H	A	A	A	H	-	A	A	A	H	B	B	B	H	A	A	A	A
C/T	Ps130351	B	B	H	A	A	A	H	B	B	B	B	H	A	A	A	A	A	A	A	B
C/T	Ps130406	B	B	H	A	A	A	A	A	B	B	B	H	A	A	A	A	A	B	B	A
A/C	Ps130453	B	B	H	A	A	A	A	-	B	B	B	B	B	B	B	H	A	-	B	A
A/C	Ps130478	B	B	H	A	A	A	H	B	A	A	A	H	B	B	B	H	A	A	A	A
C/T	Ps130483	B	B	H	A	A	A	A	A	B	B	B	-	A	A	A	A	A	B	B	A
C/T	Ps130485	B	B	H	A	A	A	A	A	A	A	A	A	A	A	A	H	B	A	A	A
A/G	Ps130525	B	B	H	A	A	A	A	A	A	A	A	A	A	A	A	A	A	A	A	A
T/G	Ps130592	B	B	H	A	A	A	H	B	B	B	B	H	A	A	A	H	B	B	B	A
A/G	Ps130596	B	B	-	A	A	A	H	B	A	A	A	H	B	B	B	B	B	A	A	B
C/T	Ps130807	B	B	H	A	A	A	H	B	B	B	B	B	B	B	B	B	B	B	B	A
C/T	Ps130833	B	B	H	A	A	A	A	A	B	B	B	B	B	B	B	H	A	B	B	A
A/G	Ps130890	B	B	H	A	-	A	H	B	B	B	B	H	A	A	A	H	B	B	B	A
T/G	Ps130918	B	B	H	A	A	A	A	A	B	B	B	B	B	B	B	H	A	B	B	A
C/T	Ps131102	B	B	H	A	A	A	A	A	A	A	A	A	A	A	A	A	A	A	A	A
A/C	Ps131335	B	B	H	A	A	A	A	A	B	B	B	A	A	A	A	A	A	B	B	A
A/G	Ps131409	B	B	H	A	A	A	H	B	B	B	B	H	A	A	A	A	A	B	B	A
A/G	Ps131484	B	-	-	A	A	A	A	A	A	A	A	A	A	A	A	A	A	A	A	A
C/T	Ps131516	B	B	H	A	A	A	H	B	B	B	B	H	A	A	A	A	A	B	B	A
A/G	Ps131557	B	B	H	A	A	A	H	B	B	B	B	B	B	B	B	B	B	B	B	B
C/T	Ps131566	B	B	H	A	A	A	A	A	A	A	A	A	A	A	A	-	A	A	A	A
A/C	Ps131601	B	B	H	A	A	A	H	B	A	A	A	H	B	B	B	H	-	A	A	B
C/T	Ps131694	B	B	H	A	A	A	A	A	B	B	B	H	A	A	A	A	A	B	B	A
A/C	Ps131783	B	B	H	A	A	A	A	A	B	B	B	H	A	A	A	A	A	B	B	A
A/G	Ps131798	B	B	H	A	A	A	H	-	B	B	B	H	A	A	A	H	B	B	B	A
A/G	Ps131943	B	B	H	A	A	A	H	B	B	B	B	B	B	B	B	B	B	B	B	B
T/G	Ps131985	B	B	H	A	A	A	A	A	A	A	A	H	B	B	B	H	A	B	B	A
C/G	Ps132070	B	B	H	A	A	A	A	A	A	A	A	A	A	A	A	A	A	A	A	A
A/G	Ps132111	B	B	H	A	A	A	A	A	B	B	B	B	B	B	B	H	A	B	B	A
A/G	Ps132117	B	B	H	A	A	A	-	A	A	A	A	A	A	A	A	A	A	A	A	A
A/C	Ps132126	B	B	-	A	A	A	H	B	B	B	B	H	A	A	A	H	B	B	B	A
C/G	Ps132199	B	B	H	A	A	A	A	A	B	B	B	H	A	A	A	H	B	B	B	A
C/T	Ps132228	B	B	H	A	A	A	H	B	B	B	B	B	B	B	B	B	B	B	B	A
A/G	Ps132248	B	B	H	A	A	A	A	A	B	B	B	H	A	A	A	H	B	B	B	A
T/G	Ps132295	B	B	-	A	A	A	H	B	B	B	B	B	B	B	B	H	A	B	B	A
A/C	Ps132306	B	B	H	A	A	A	A	A	B	B	B	H	A	A	A	A	A	B	B	A
A/G	Ps132370	B	B	-	A	A	A	-	-	B	B	B	H	A	A	A	H	B	B	B	A
C/T	Ps132386	B	B	H	A	A	A	H	B	B	B	B	H	A	A	A	H	B	B	B	A
C/T	Ps132393	B	B	H	A	A	A	H	B	B	B	B	H	A	A	A	-	B	B	B	A
A/G	Ps132403	B	B	H	A	A	A	A	A	A	A	A	A	A	A	A	H	B	A	A	A
C/T	Ps132415	B	B	H	A	A	A	A	A	B	B	B	H	A	A	A	A	A	B	B	A
T/G	Ps132434	B	B	H	A	A	A	A	A	B	B	B	B	B	B	B	H	A	B	B	B
A/C	Ps132446	B	B	H	A	A	A	A	-	B	B	B	B	B	B	B	H	A	B	B	A
C/T	Ps132637	B	B	H	A	A	A	H	B	B	B	B	B	B	B	B	B	B	B	B	A
C/T	Ps132671	B	B	H	A	A	A	H	-	B	B	B	B	B	B	B	H	A	B	B	A
A/C	Ps132775	B	B	-	A	A	A	A	A	B	B	B	H	A	A	A	A	A	B	B	A
C/T	Ps132878	B	B	H	A	A	A	H	B	B	B	B	H	A	A	A	H	B	B	B	A
C/T	Ps132890	B	B	H	A	A	A	A	A	A	A	A	A	A	A	A	H	B	A	A	A
A/G	Ps132891	B	B	H	A	A	A	H	B	A	A	A	H	B	B	B	H	A	A	A	A
A/T	Ps132981	B	B	H	A	A	A	H	B	-	B	B	B	B	B	B	H	A	B	B	A
A/G	Ps133018	B	B	H	A	A	A	H	B	B	B	B	H	A	A	A	H	B	B	B	A
T/G	Ps133021	B	B	H	A	A	A	A	A	B	B	B	H	A	A	A	H	B	B	B	A
A/G	Ps133094	B	B	-	A	A	A	H	B	B	B	B	B	B	B	B	-	A	B	B	A
A/G	Ps133146	B	B	H	A	A	A	H	H	B	B	B	H	A	A	A	H	B	B	B	A
C/T	Ps133296	B	B	H	A	A	A	H	B	B	B	B	H	A	A	A	H	B	B	B	A
A/G	Ps133331	B	B	H	A	A	A	H	-	A	A	A	A	A	A	A	A	A	A	A	A
C/G	Ps133428	B	B	H	A	A	A	H	B	A	A	A	H	B	B	B	H	A	B	B	A
A/T	Ps133533	B	B	H	A	A	A	H	B	B	B	B	B	B	B	B	B	B	B	B	A
C/T	Ps133721	B	B	-	A	A	A	H	B	B	B	B	B	B	B	B	B	B	B	B	A
C/T	Ps133911	B	B	H	A	A	A	H	B	B	B	B	H	A	A	A	H	B	B	B	A
A/G	Ps133955	B	B	H	A	A	A	A	A	B	B	B	H	A	A	A	H	B	B	B	A
C/T	Ps133973	B	B	H	A	A	A	A	A	B	B	B	H	A	A	A	H	B	B	B	-
A/G	Ps134031	B	B	H	A	A	A	A	A	B	B	B	B	B	B	B	B	B	B	B	A
C/T	Ps134068	B	B	H	A	A	A	H	-	-	B	B	H	A	A	A	A	A	B	B	A
A/G	Ps134189	B	B	-	A	A	A	H	B	A	A	A	-	B	B	B	H	A	A	A	A
T/G	Ps134241	B	B	H	A	A	A	A	A	B	B	B	-	A	A	A	A	A	A	A	A
A/G	Ps134345	B	B	H	A	A	A	A	A	B	B	B	H	A	A	A	A	A	B	B	A
A/G	Ps134375	B	B	H	A	A	A	A	A	B	B	B	B	B	B	B	B	B	B	B	A
C/T	Ps134428	B	B	-	A	A	A	H	B	B	B	B	H	A	A	A	H	B	B	B	B
A/G	Ps134615	B	B	H	A	A	A	H	B	B	B	B	B	B	B	B	H	A	B	B	B
C/T	Ps134681	B	B	H	A	A	A	A	-	B	B	B	B	B	B	B	-	A	B	B	A
A/C	Ps134716	B	B	H	A	A	A	A	A	A	A	A	A	A	A	A	A	A	B	B	A
T/G	Ps134717	B	B	H	A	A	A	H	-	B	B	B	H	A	A	A	A	A	B	B	A
C/T	Ps134752	B	B	-	A	A	A	H	B	A	A	A	H	B	B	B	H	A	B	B	A
A/G	Ps134836	B	B	-	A	A	A	-	B	B	B	B	B	B	B	B	B	B	B	B	A
C/T	Ps134965	B	B	H	A	A	A	-	A	-	B	B	H	A	A	A	H	B	B	B	A
C/T	Ps134982	B	B	H	A	A	A	A	A	-	B	B	B	B	B	B	H	A	B	B	A
A/T	Ps135096	B	B	H	A	A	A	A	A	B	B	B	H	A	A	A	H	B	B	B	B
A/G	Ps135191	B	B	H	A	A	A	A	A	A	A	A	A	A	A	A	H	B	B	B	B
C/G	Ps135370	B	B	H	A	A	A	A	A	B	B	B	H	A	A	A	H	B	B	B	A
C/G	Ps135557	B	B	H	A	A	A	H	B	A	A	A	H	B	B	B	H	A	A	A	B
C/T	Ps135676	B	B	H	A	A	A	H	B	B	B	B	B	B	B	B	B	B	A	A	B
A/C	Ps135682	B	B	H	A	A	A	-	H	B	B	B	H	A	A	A	A	A	B	B	A
A/G	Ps135694	B	B	H	A	A	A	H	B	B	B	B	B	B	B	B	H	A	B	B	A
A/G	Ps135722	B	B	H	A	A	A	-	-	B	-	B	H	A	A	A	H	B	B	B	A
A/G	Ps135789	B	B	H	A	A	A	A	A	B	B	B	H	A	A	A	H	B	B	B	A
C/T	Ps135812	B	B	H	A	A	A	H	B	B	B	B	H	A	A	A	A	A	B	B	A
C/T	Ps135869	B	B	H	A	A	A	A	A	B	B	B	B	B	B	B	B	B	B	B	A
C/G	Ps135906	B	B	H	A	A	A	A	A	B	B	B	B	B	B	B	H	A	A	A	A
C/T	Ps135927	B	B	H	A	A	A	-	A	-	-	-	B	B	B	B	H	A	-	-	A
A/G	Ps135952	B	B	-	A	A	A	-	-	B	B	B	B	B	B	B	B	B	B	B	A
A/G	Ps136061	B	B	H	A	A	A	H	B	A	A	A	H	B	B	B	H	A	B	B	A
C/T	Ps136063	B	B	H	A	A	A	A	A	B	B	B	-	A	A	A	-	B	B	B	A
T/G	Ps136108	B	B	H	A	A	A	H	B	B	B	B	B	B	B	B	B	B	B	B	B
C/T	Ps136116	B	B	H	A	A	A	A	A	B	B	B	H	A	A	A	H	B	B	B	A
A/G	Ps136186	B	B	H	A	A	A	H	-	A	A	A	H	B	B	B	H	A	A	A	A
C/T	Ps136244	B	B	H	-	A	A	A	A	A	A	A	H	B	B	B	H	A	B	B	A
C/T	Ps136286	B	B	H	A	A	A	A	A	A	A	A	A	A	A	A	A	A	A	A	A
C/T	Ps136346	B	B	H	A	A	A	A	A	B	B	B	B	B	B	B	H	A	B	B	A
A/T	Ps136512	B	B	H	A	A	A	H	B	A	A	A	H	B	B	B	H	A	B	B	A
A/C	Ps136525	B	B	H	A	A	A	A	A	B	B	B	H	A	A	A	H	B	B	B	A
A/G	Ps136713	B	B	H	A	A	A	A	-	A	-	A	H	B	B	B	H	A	B	B	A
A/C	Ps136983	B	B	H	A	A	A	H	B	B	B	B	H	A	A	A	A	A	B	B	A
C/T	Ps137077	B	B	H	A	A	A	-	A	B	B	B	B	B	B	B	B	B	B	B	A
A/C	Ps137100	B	B	H	A	A	A	H	B	B	B	B	H	A	-	A	A	A	B	B	A
A/G	Ps137127	B	B	H	A	A	A	H	B	A	A	A	H	B	B	B	B	B	A	A	A
A/G	Ps137145	B	B	H	A	A	A	H	B	A	A	A	A	B	B	B	A	A	B	B	A
C/T	Ps137195	B	B	H	A	A	A	A	A	B	B	B	H	A	A	A	H	B	B	B	A
A/C	Ps137278	B	B	-	A	A	A	H	B	A	A	A	H	B	B	B	H	A	A	A	A
A/G	Ps137315	B	B	H	A	A	A	A	A	B	B	B	H	A	A	A	A	A	B	B	A
T/G	Ps137391	B	B	-	A	A	A	A	A	A	A	A	-	B	B	B	-	A	B	B	A
A/C	Ps137672	B	B	H	A	A	A	H	B	B	B	B	H	A	A	A	H	B	B	B	B
C/G	Ps137816	B	B	H	A	A	A	A	A	B	B	B	B	B	B	B	H	A	B	B	A
T/G	Ps137837	B	-	-	-	A	A	-	A	B	B	B	H	A	A	A	H	B	B	B	A
C/T	Ps137992	B	B	-	A	A	A	A	A	B	B	B	H	A	A	A	H	B	B	B	A
C/G	Ps138169	B	B	H	A	A	A	H	B	B	B	B	B	B	B	B	-	A	B	B	A
A/G	Ps138212	B	B	H	A	A	A	H	B	A	A	A	H	B	B	B	B	B	A	A	B
A/G	Ps138228	B	B	H	A	A	A	H	B	A	A	A	H	B	B	B	H	A	B	B	A
C/T	Ps138263	B	B	H	A	A	A	H	B	B	B	B	-	A	A	A	H	-	B	B	A
A/T	Ps138444	B	B	H	A	A	A	H	B	B	B	B	B	B	B	B	H	A	B	B	A
T/G	Ps138500	B	B	H	A	A	A	H	-	A	A	A	H	B	B	B	H	A	A	A	B
A/G	Ps138518	B	B	H	A	A	A	H	B	B	B	B	B	B	B	B	H	A	B	B	A
A/G	Ps138557	B	B	H	A	A	A	A	A	B	B	B	H	A	A	A	A	A	B	B	A
A/G	Ps138574	B	B	H	A	A	A	A	A	B	B	B	B	B	B	B	B	B	B	B	A
A/G	Ps138602	B	B	H	A	A	A	A	-	B	B	B	H	A	A	A	A	A	B	B	A
C/T	Ps138765	B	B	H	A	A	A	H	B	B	B	B	B	B	B	B	H	A	B	B	B
C/T	Ps138779	B	B	H	A	A	A	A	A	B	B	B	B	B	B	B	B	B	B	B	B
C/T	Ps138782	B	B	H	A	A	A	H	B	B	B	B	B	B	B	B	H	A	B	B	A
C/T	Ps138860	B	B	H	A	A	A	H	B	B	B	B	B	B	B	B	B	B	B	B	A
A/T	Ps138921	B	B	H	A	A	A	H	B	B	B	B	B	B	B	B	B	B	B	B	A
C/T	Ps138969	B	B	H	A	A	A	A	A	A	A	A	A	A	A	A	A	A	A	A	A
C/T	Ps139148	B	B	-	A	A	A	H	B	B	B	B	B	B	B	B	B	B	B	B	A
C/T	Ps139170	B	B	-	A	A	A	A	A	B	B	B	H	A	A	A	-	B	B	B	A
C/T	Ps139182	B	B	H	A	A	A	A	A	B	B	B	H	A	A	A	A	A	B	B	A
C/T	Ps139191	B	B	H	A	A	A	H	B	B	B	B	H	A	A	A	H	B	B	B	A
C/G	Ps139340	B	B	H	A	A	A	A	A	B	B	B	H	A	A	A	H	B	B	B	A
A/G	Ps139438	B	B	H	A	A	A	H	B	B	B	B	H	A	A	A	H	B	B	B	A
A/G	Ps139587	B	B	H	A	A	A	H	B	B	B	B	H	A	A	A	H	B	B	B	A
C/T	Ps139683	B	B	H	A	A	A	H	B	B	B	B	B	B	B	B	B	B	B	B	A
C/T	Ps139753	B	B	H	A	A	A	A	A	A	A	A	H	B	B	B	H	A	B	B	A
A/C	Ps139785	B	B	H	A	-	A	H	B	B	B	B	H	A	A	A	H	B	B	B	A
T/G	Ps139794	B	B	H	A	A	A	-	-	B	B	B	B	B	B	B	B	B	B	B	A
A/G	Ps139801	B	-	-	A	A	A	H	B	B	B	B	B	B	B	B	H	A	B	B	A
C/T	Ps139976	B	B	H	A	A	A	A	A	A	A	A	A	A	A	A	H	B	A	A	A
A/G	Ps140038	B	B	-	A	A	A	H	B	B	B	B	B	B	B	B	H	A	B	B	A
A/G	Ps140052	B	B	H	A	A	A	H	B	B	B	B	B	B	B	B	B	B	B	B	B
C/T	Ps140055	B	B	H	A	A	A	A	A	A	A	A	A	A	A	A	H	B	A	A	A
C/G	Ps140331	B	B	H	A	A	A	A	-	B	B	B	B	B	B	B	H	A	B	B	A
A/C	Ps140347	B	B	H	A	A	A	A	A	B	B	B	H	A	A	A	H	B	-	B	A
A/C	Ps140381	B	B	H	A	A	A	H	B	B	B	B	H	A	A	A	H	B	B	B	A
C/T	Ps140568	B	B	H	A	A	A	H	B	-	-	-	A	A	A	A	-	B	A	A	B
A/T	Ps140633	B	B	H	A	A	A	A	A	A	A	A	A	A	A	A	A	A	B	B	A
C/T	Ps140695	B	B	H	A	A	A	A	A	B	B	B	H	A	A	A	H	B	B	B	A
A/G	Ps140765	B	B	H	A	A	A	A	A	A	A	A	A	A	A	A	A	A	B	B	A
A/G	Ps140802	B	B	H	A	A	A	-	B	B	B	B	H	A	A	A	A	A	B	B	A
C/G	Ps140873	B	B	-	A	A	A	A	A	A	A	A	A	A	A	A	A	A	B	B	A
C/T	Ps140950	B	B	H	A	A	A	A	A	A	A	A	A	A	A	A	A	A	B	B	A
A/T	Ps140975	B	B	H	A	A	A	H	B	B	B	B	H	A	A	A	H	B	B	B	A
C/T	Ps141157	B	B	H	A	A	A	H	B	B	B	B	H	A	A	A	H	B	B	B	A
C/G	Ps141163	B	B	H	A	A	A	H	B	A	A	A	H	B	B	B	H	A	B	B	A
C/T	Ps141497	B	B	H	A	A	A	A	A	B	B	B	H	A	A	A	A	A	B	B	A
C/T	Ps141569	B	B	H	A	A	A	H	B	B	B	B	B	B	B	B	B	B	B	B	B
A/G	Ps141626	B	B	H	A	A	A	H	B	B	B	B	H	A	A	A	A	A	A	A	A
C/T	Ps141631	B	B	H	A	A	A	A	A	B	B	B	H	A	A	A	H	B	B	B	A
A/G	Ps141719	B	B	H	A	A	A	H	B	B	B	B	B	B	B	B	B	B	B	B	A
C/T	Ps141760	B	B	H	A	A	A	H	B	B	B	B	H	A	A	A	A	A	B	B	B
A/G	Ps141780	B	B	H	A	A	A	A	A	A	A	A	H	B	B	B	H	A	A	A	B
T/G	Ps141864	B	B	H	A	A	A	H	B	B	B	B	B	B	B	B	B	-	B	B	A
A/C	Ps141890	B	B	H	A	A	A	H	-	A	A	A	H	B	B	B	H	A	B	B	A
A/G	Ps142055	B	B	H	A	A	A	H	B	B	B	B	H	A	A	A	A	A	B	B	A
C/T	Ps142095	B	B	H	A	A	A	A	A	B	B	B	H	A	A	A	A	A	A	A	A
C/T	Ps142127	B	B	H	A	A	A	-	-	B	B	B	H	A	A	A	H	B	B	B	A
C/T	Ps142196	B	B	H	A	A	A	A	A	B	B	B	B	B	B	B	H	A	B	B	A
A/G	Ps142248	B	B	H	A	A	A	A	A	A	A	A	A	A	A	A	A	A	B	B	A
C/T	Ps142383	B	B	-	A	A	A	H	B	B	B	B	B	B	B	B	H	A	B	B	A
C/T	Ps142394	B	B	H	A	A	A	H	-	A	A	A	A	A	A	A	A	A	B	B	A
C/T	Ps142522	B	B	H	A	A	A	A	A	B	B	B	H	A	A	A	A	A	B	B	A
C/T	Ps142584	B	B	H	A	A	A	-	-	A	A	A	H	B	B	B	H	A	A	A	A
A/C	Ps142699	B	B	H	A	A	A	H	B	B	B	B	H	A	A	A	A	A	B	B	A
C/G	Ps142770	B	B	H	A	A	A	A	A	B	B	B	H	A	A	A	A	A	B	B	B
A/G	Ps142779	B	B	H	A	A	A	A	A	B	B	B	H	A	A	A	H	B	B	B	A
A/G	Ps142866	B	B	H	A	A	A	A	A	B	B	B	H	A	A	A	A	A	B	B	A
C/T	Ps142918	B	B	H	A	A	A	H	B	B	B	B	H	A	A	A	H	B	B	B	A
C/G	Ps142943	B	B	-	A	A	A	H	B	A	A	A	H	B	B	B	B	B	B	B	B
T/G	Ps143033	B	-	H	A	A	A	A	A	A	A	A	A	A	A	A	H	B	A	A	A
A/G	Ps143141	B	B	H	A	A	A	A	A	A	A	A	H	B	B	B	H	A	A	A	A
C/T	Ps143192	B	B	H	A	A	A	A	-	B	B	B	B	B	B	B	B	B	B	B	A
A/G	Ps143217	B	B	H	A	A	A	H	B	A	A	A	H	B	B	B	H	A	B	B	A
C/G	Ps143454	B	B	H	A	A	A	A	-	B	B	B	H	A	A	A	H	B	B	B	A
A/G	Ps143491	B	B	-	A	A	A	A	A	B	B	B	H	A	A	A	H	B	B	B	A
C/T	Ps143501	B	B	H	A	A	A	H	B	B	B	B	H	A	A	A	A	A	B	B	A
A/C	Ps143548	B	B	H	A	A	A	A	A	A	A	A	A	A	A	A	A	A	B	B	A
A/C	Ps143599	B	B	H	A	A	A	A	A	B	B	B	H	A	A	A	A	A	B	B	A
C/T	Ps143634	B	B	H	A	A	A	H	B	B	B	B	H	A	A	A	A	A	B	B	A
A/G	Ps143673	B	B	H	A	A	A	A	A	A	A	A	A	A	A	A	H	B	A	A	A
A/T	Ps143679	B	B	H	A	A	A	H	B	B	B	B	B	B	B	B	B	B	B	B	A
A/C	Ps143753	B	B	H	A	A	A	H	B	B	B	B	H	A	A	A	H	B	B	B	A
C/G	Ps143770	B	B	H	A	A	A	H	B	A	A	A	-	B	B	B	B	B	A	A	B
T/G	Ps143779	B	B	H	A	A	A	A	A	B	B	B	H	A	A	A	H	B	B	B	B
C/G	Ps143953	B	B	H	A	A	A	A	A	B	B	B	H	A	A	A	A	A	B	B	A
A/G	Ps143962	B	B	H	A	A	A	H	B	B	B	B	H	A	A	A	H	B	B	B	A
C/T	Ps144034	B	B	H	A	A	A	A	A	A	A	A	H	B	B	B	B	B	A	A	B
A/G	Ps144040	B	B	H	A	A	A	H	B	B	B	B	H	A	A	A	H	B	B	B	A
C/T	Ps144067	B	B	H	A	A	A	A	A	A	A	A	A	A	A	A	A	A	A	A	A
C/T	Ps144209	B	B	H	A	A	A	H	B	A	A	A	H	B	B	B	H	A	B	B	A
C/T	Ps144256	B	B	H	A	A	A	A	A	A	A	A	H	B	B	B	H	A	A	A	B
C/T	Ps144334	B	B	H	A	A	A	A	H	B	B	B	H	A	A	A	A	A	B	B	A
A/G	Ps144352	B	B	H	A	A	A	H	B	B	B	B	B	B	B	B	B	B	B	B	A
A/G	Ps144367	B	B	H	A	A	A	A	A	B	B	B	H	A	A	A	A	A	B	B	A
C/T	Ps144392	B	B	H	A	A	A	H	B	B	B	B	H	A	A	A	A	A	B	B	A
A/T	Ps144397	B	B	H	A	A	A	H	-	B	B	B	H	A	A	A	H	B	B	B	B
A/C	Ps144399	B	B	-	A	A	A	H	B	B	B	B	B	B	B	B	B	B	B	B	A
A/G	Ps144410	B	B	H	A	A	A	A	A	B	B	B	H	A	A	A	A	A	B	B	A
A/G	Ps144462	B	B	H	A	A	A	A	A	B	B	B	H	A	A	A	A	A	A	A	A
A/G	Ps144553	B	B	H	A	A	A	H	-	B	B	B	H	A	A	A	A	A	B	B	A
A/G	Ps144631	B	B	-	A	A	A	A	A	B	B	B	H	A	A	A	H	B	B	B	A
A/G	Ps144637	B	B	H	A	A	A	A	A	B	B	B	H	A	A	A	H	B	B	B	A
A/G	Ps144646	B	B	H	A	A	A	A	A	B	B	B	H	A	A	A	A	A	B	B	A
C/T	Ps144780	B	B	-	A	A	A	H	B	B	B	B	H	A	A	A	H	B	B	B	A
A/T	Ps144782	B	B	H	A	A	A	-	-	B	B	B	H	A	A	A	A	A	B	B	A
C/T	Ps144791	B	B	H	A	A	A	H	B	B	B	B	B	B	B	B	H	A	B	B	A
A/G	Ps144805	B	B	H	A	A	A	A	A	A	A	A	H	B	B	B	H	A	A	A	A
A/G	Ps144808	B	B	H	A	A	A	A	-	B	B	B	B	B	B	B	H	A	B	B	B
A/G	Ps144810	B	B	H	A	A	A	A	A	B	B	B	H	A	A	A	A	A	B	B	A
A/C	Ps144862	B	B	H	A	A	A	A	A	B	B	B	H	A	A	A	H	B	B	B	A
C/T	Ps144873	B	B	H	A	A	A	H	H	B	B	B	B	B	B	B	H	A	B	B	A
C/T	Ps144975	B	B	H	A	A	A	H	B	B	B	B	B	B	B	B	B	B	B	B	A
A/C	Ps144998	B	B	H	A	A	A	H	B	B	B	B	H	A	A	A	A	A	B	B	A
C/T	Ps145061	B	B	H	A	A	A	H	B	B	B	B	H	A	A	A	H	B	B	B	A
T/G	Ps145124	B	B	H	A	A	A	H	B	B	B	B	B	B	B	B	B	B	B	B	B
T/G	Ps145188	B	B	H	A	A	A	H	B	B	B	B	H	A	A	A	H	B	B	B	A
C/G	Ps145225	B	B	H	A	A	A	-	B	A	A	A	H	B	B	B	-	A	A	A	B
A/G	Ps145241	B	B	H	A	A	A	H	-	B	B	B	H	A	A	A	A	A	B	B	A
T/G	Ps145283	B	B	-	A	A	A	H	A	A	A	A	H	B	B	B	H	A	A	A	B
A/C	Ps145314	B	B	H	A	A	A	H	B	B	B	B	-	A	A	A	-	B	B	B	B
C/T	Ps145339	B	B	H	A	A	A	H	B	B	B	B	H	A	A	A	A	A	B	B	A
T/G	Ps145380	B	B	H	A	A	A	A	B	B	B	B	B	B	B	B	B	B	B	B	A
A/C	Ps145391	B	B	-	A	A	A	H	B	B	B	B	B	B	B	B	H	A	B	B	A
A/C	Ps145403	B	B	H	A	A	A	A	A	B	B	B	H	A	A	A	A	A	B	B	A
A/C	Ps145423	B	B	H	A	A	A	A	A	B	B	B	B	B	B	B	B	B	B	B	A
C/T	Ps145562	B	B	-	A	A	A	A	A	B	B	B	H	A	A	A	A	A	B	B	A
A/T	Ps145579	B	B	H	A	A	A	H	B	B	B	B	H	A	A	A	H	B	B	B	A
A/G	Ps145586	B	B	H	A	A	A	H	B	B	B	B	H	A	A	A	H	B	B	B	B
A/G	Ps145704	B	B	H	A	A	A	H	B	B	B	B	H	A	A	A	H	B	B	B	A
A/T	Ps145752	B	B	-	A	A	A	A	A	A	A	A	A	A	A	A	A	A	A	A	A
C/T	Ps146004	B	B	H	A	A	A	A	A	B	B	B	H	A	A	A	H	B	B	B	A
C/T	Ps146052	B	B	H	A	A	A	H	B	B	B	B	H	A	A	A	A	A	B	B	A
A/G	Ps146134	B	B	H	A	A	A	-	-	B	B	B	B	B	B	B	H	-	B	B	A
C/T	Ps146264	B	B	H	A	A	A	A	-	B	B	B	B	B	B	B	H	A	B	B	A
A/G	Ps146301	B	B	H	A	A	A	-	-	B	B	B	B	B	B	B	H	A	B	B	A
C/T	Ps146333	B	B	H	A	A	A	H	H	B	B	B	B	B	B	B	B	B	B	B	A
C/T	Ps146439	B	B	H	A	A	A	A	A	B	B	B	H	A	A	A	H	B	B	B	A
T/G	Ps146719	B	B	H	A	A	A	H	-	A	A	A	H	B	B	B	H	A	A	A	A
A/G	Ps146725	B	B	H	A	A	A	H	B	B	B	B	H	A	A	A	H	B	-	-	A
A/G	Ps146783	B	B	H	A	A	A	A	A	B	B	B	H	A	A	A	A	A	B	B	A
A/G	Ps146788	B	B	-	A	A	A	A	H	B	B	B	H	A	A	A	H	B	B	B	A
A/T	Ps146800	B	B	H	A	A	A	H	B	B	B	B	H	A	A	A	-	B	B	B	A
C/T	Ps146814	B	B	H	A	A	A	H	B	B	B	B	H	A	A	A	A	A	B	B	A
C/T	Ps147381	B	B	H	A	A	A	H	B	B	B	B	H	A	A	A	H	B	A	A	B
A/G	Ps147586	B	B	H	A	A	A	A	A	B	B	B	H	A	A	A	A	A	B	B	A
A/G	Ps147630	B	B	H	A	A	A	H	B	B	B	B	B	B	B	B	H	A	B	B	A
C/T	Ps147659	B	B	H	A	A	A	H	B	B	B	B	H	A	A	A	A	A	B	B	A
A/G	Ps147743	B	B	H	A	A	A	-	H	B	B	B	B	B	B	B	H	A	B	B	A
A/G	Ps147788	B	B	H	A	A	A	H	B	B	B	B	H	A	A	A	H	B	B	B	A
C/T	Ps148084	B	B	H	A	A	A	H	B	B	B	B	H	A	A	A	H	B	B	B	A
C/G	Ps148140	B	B	H	A	A	A	H	H	B	B	-	H	A	A	A	H	B	B	B	A
C/T	Ps148237	B	B	-	A	A	A	-	H	B	B	B	H	A	A	A	H	B	B	B	A
C/T	Ps148332	B	B	H	A	A	A	H	B	B	B	B	B	B	B	B	H	A	B	B	A
C/T	Ps148364	B	B	-	A	A	A	H	B	B	B	B	H	A	A	A	H	B	B	B	A
A/T	Ps148407	B	B	H	A	A	A	H	B	B	B	B	B	B	B	B	H	A	B	B	A
C/T	Ps148429	B	B	H	A	A	A	H	B	B	B	B	H	A	A	A	A	A	B	B	B
A/G	Ps148660	B	B	-	A	A	A	A	A	A	A	A	H	B	B	B	H	A	A	A	B
T/G	Ps148674	B	B	H	A	A	A	A	A	A	A	A	A	A	A	A	A	A	A	A	A
C/T	Ps148843	B	B	-	A	A	A	A	A	A	A	A	A	A	A	A	A	A	A	A	A
C/G	Ps148877	B	B	H	A	A	A	H	B	B	B	B	B	B	B	B	H	A	B	B	A
A/G	Ps148974	B	B	H	A	A	A	-	-	B	B	B	B	B	B	B	H	A	B	B	A
A/G	Ps149223	B	B	-	A	A	A	A	A	A	A	A	H	B	B	B	H	A	A	A	B
A/G	Ps149224	B	B	H	A	A	A	A	A	B	B	B	H	A	A	A	H	B	B	B	A
C/T	Ps149577	B	B	H	A	A	A	-	H	B	B	B	H	A	A	A	H	B	B	B	A
A/C	Ps149650	B	B	H	A	A	A	A	A	B	B	B	B	B	B	B	H	A	B	B	A
A/G	Ps149885	B	B	H	A	A	A	A	A	B	B	B	H	A	A	A	H	B	B	B	A
C/G	Ps149918	B	B	-	A	A	A	A	A	B	B	B	H	A	A	A	A	A	B	B	A
A/G	Ps150008	B	B	H	A	A	A	A	-	B	B	B	-	A	A	A	A	A	B	B	A
A/T	Ps150046	B	B	H	A	A	A	A	A	A	A	A	A	A	A	A	A	A	A	A	A
C/G	Ps150105	B	B	H	A	A	A	H	B	A	A	A	A	A	A	A	H	B	B	B	A
A/G	Ps150150	B	B	H	A	A	A	A	A	B	B	B	H	A	A	A	A	A	B	B	A
A/G	Ps150442	B	B	H	A	A	A	H	B	B	B	B	B	B	B	B	H	A	B	B	A
T/G	Ps150561	B	B	H	A	A	A	A	A	A	A	A	A	A	A	A	A	A	A	A	A
C/T	Ps150606	B	B	-	A	A	A	H	B	B	B	B	B	B	B	B	H	A	B	B	A
A/G	Ps150796	B	B	H	A	A	A	H	B	B	B	B	B	B	B	B	B	B	B	B	B
C/T	Ps150906	B	B	-	A	A	-	A	-	A	A	A	H	B	B	B	H	A	B	B	A
C/T	Ps151005	B	B	H	A	A	A	H	B	B	B	B	H	A	A	A	H	B	B	B	A
A/G	Ps151067	B	B	H	A	A	A	H	B	B	B	B	H	A	A	A	A	A	B	B	A
A/G	Ps151094	B	B	-	A	A	A	H	B	A	A	A	-	B	B	B	-	A	A	A	A
T/G	Ps151129	B	B	-	A	A	A	H	B	B	B	B	B	B	B	B	H	A	B	B	A
A/G	Ps151250	B	B	H	A	A	A	A	A	B	B	B	-	A	A	A	-	B	B	B	A
A/G	Ps151279	B	B	H	A	A	A	H	B	B	B	B	B	B	B	B	B	B	B	B	A
A/G	Ps151427	B	B	H	A	A	A	A	A	A	A	A	A	A	A	A	A	A	A	A	A
T/G	Ps151519	B	B	H	A	A	A	H	B	B	B	B	B	B	B	B	H	A	B	B	B
C/T	Ps151606	B	B	H	A	A	A	H	B	A	A	A	H	B	B	B	H	A	A	A	B
C/T	Ps151620	B	B	H	A	A	A	H	B	B	B	B	B	B	B	B	B	B	B	B	B
C/T	Ps151786	B	B	H	A	A	A	A	A	B	B	B	B	B	B	B	H	A	B	B	A
C/T	Ps151792	B	B	H	A	A	A	H	B	B	B	B	B	B	B	B	H	A	B	B	B
A/G	Ps151848	B	B	H	A	A	A	H	B	B	B	B	H	A	A	A	A	A	B	B	A
A/G	Ps151912	B	B	H	A	A	A	H	B	B	B	B	B	B	B	B	H	A	B	B	A
T/G	Ps151967	B	B	H	A	A	A	A	A	A	A	A	H	B	B	B	H	A	A	A	A
C/T	Ps151991	B	B	H	A	A	A	A	A	B	B	B	H	A	A	A	A	A	B	B	A
A/G	Ps151993	B	B	H	A	A	A	H	B	B	B	B	B	B	B	B	H	A	B	B	A
T/G	Ps152254	B	B	H	A	A	A	H	B	A	A	A	A	A	A	A	H	B	A	A	A
C/T	Ps152489	B	B	H	A	A	A	-	H	-	-	-	A	A	A	A	A	-	-	-	A
A/G	Ps152512	B	B	H	A	A	A	A	A	B	B	B	H	A	A	A	H	B	A	A	B
C/T	Ps152534	B	B	H	A	A	A	H	B	B	B	B	B	B	B	B	B	B	B	B	A
A/G	Ps152538	B	B	H	A	A	A	A	A	B	B	B	H	A	A	A	A	A	B	B	A
T/G	Ps152554	B	B	H	A	A	A	H	B	B	B	B	H	A	A	A	H	B	B	B	A
A/G	Ps152607	B	B	H	A	A	A	H	B	B	B	B	B	B	B	B	B	B	B	B	A
A/G	Ps152969	B	B	H	A	A	A	H	B	B	B	B	-	A	A	A	H	B	B	B	A
A/C	Ps153078	B	B	H	A	A	A	-	B	B	B	B	B	B	B	B	-	A	B	B	A
A/G	Ps153126	B	B	H	A	A	A	-	A	B	B	B	B	B	B	B	B	B	B	B	A
A/G	Ps153151	B	B	H	A	A	A	H	H	-	-	-	A	A	A	A	A	A	B	B	A
A/G	Ps153167	B	B	H	A	A	A	-	B	B	B	B	H	A	A	A	H	B	B	B	A
C/G	Ps153191	B	-	H	A	A	A	A	A	B	B	B	B	B	B	B	H	A	B	B	A
C/T	Ps153219	B	B	H	A	A	A	H	-	B	B	B	H	A	A	A	H	B	B	B	A
T/G	Ps153238	B	B	H	A	A	A	H	B	B	B	B	B	B	B	B	B	B	B	B	B
C/T	Ps153254	B	B	H	A	A	A	A	A	A	A	A	A	A	A	A	H	B	A	A	A
C/T	Ps153357	B	B	H	A	A	A	H	B	B	B	B	H	A	A	A	H	B	B	B	A
T/G	Ps153386	B	B	-	A	A	A	-	B	B	B	B	B	B	B	B	-	A	B	B	A
A/G	Ps153529	B	B	H	A	A	A	H	B	A	A	A	H	B	B	B	H	A	A	A	A
A/G	Ps153755	B	B	H	A	A	-	H	B	B	B	B	H	A	A	A	A	A	B	B	A
C/T	Ps153981	B	B	H	A	A	A	A	A	A	A	A	H	B	B	B	H	A	B	B	A
C/T	Ps154011	B	B	H	A	A	A	H	B	B	B	B	H	A	A	A	H	B	B	B	A
C/T	Ps154052	B	B	H	A	A	A	H	B	B	B	B	H	A	A	A	A	A	B	B	B
C/T	Ps154132	B	B	H	A	A	A	H	B	B	B	B	H	A	A	A	A	A	B	B	A
A/G	Ps154217	B	B	-	A	A	A	A	A	A	A	A	A	A	A	A	A	A	-	-	A
A/G	Ps154347	B	B	H	A	A	A	H	B	B	B	B	B	B	B	B	H	A	B	B	A
C/G	Ps154386	B	B	H	A	A	A	H	H	A	A	A	H	B	B	B	H	A	B	B	A
C/T	Ps154505	B	B	H	A	A	A	A	B	B	B	B	H	A	A	A	A	A	B	B	A
A/C	Ps154507	B	B	H	A	A	A	A	-	B	B	B	B	B	B	B	B	B	B	B	A
T/G	Ps154523	B	B	H	A	A	A	A	A	A	A	A	A	A	A	A	A	A	A	A	A
A/G	Ps154543	B	B	H	A	A	A	A	A	B	B	B	H	A	A	A	A	A	B	B	A
A/G	Ps154683	B	B	H	A	A	A	A	A	A	A	A	A	A	A	A	H	B	A	A	A
C/T	Ps154692	B	B	H	A	A	A	A	A	B	B	B	H	A	A	A	H	B	B	B	A
C/T	Ps154836	B	B	H	A	A	A	A	A	-	-	-	A	A	A	A	A	A	-	-	B
A/G	Ps154845	B	B	H	A	A	A	A	A	B	B	B	H	A	A	A	A	A	B	B	A
C/T	Ps154877	B	B	-	A	A	A	-	H	B	B	B	B	B	B	B	B	B	B	B	A
A/G	Ps155111	B	B	-	A	A	A	A	A	A	A	A	A	A	A	A	A	A	A	A	A
C/T	Ps155115	B	B	H	A	A	A	H	B	B	B	B	-	B	B	B	H	A	B	B	A
A/G	Ps155194	B	B	-	A	A	A	A	A	A	A	A	A	A	A	A	-	B	A	A	A
A/G	Ps155195	B	B	-	A	A	A	-	A	B	B	B	H	A	A	A	H	B	B	B	A
A/G	Ps155263	B	B	H	A	A	A	H	B	B	B	B	H	A	A	A	A	A	A	A	B
C/T	Ps155294	B	B	H	A	A	A	A	-	B	B	B	H	A	A	A	A	A	B	B	A
T/G	Ps155298	B	B	H	A	A	A	H	B	B	-	B	B	B	B	B	H	A	B	B	A
C/T	Ps155443	B	B	H	A	A	A	A	A	B	B	B	H	A	A	A	H	B	B	B	B
C/T	Ps155506	B	B	-	A	A	A	A	A	A	A	A	A	A	A	A	A	A	A	A	H
T/G	Ps155655	B	B	H	A	A	A	H	H	B	B	B	H	A	A	A	H	B	B	B	A
C/G	Ps155725	B	B	H	A	A	A	H	B	B	B	B	B	B	B	B	B	B	A	A	B
A/G	Ps155806	B	B	H	A	A	A	A	A	A	A	A	A	A	A	A	A	A	B	B	A
A/G	Ps155967	B	B	H	A	A	A	A	A	A	A	A	A	A	A	A	A	A	A	A	A
A/C	Ps156067	B	B	H	A	A	A	A	A	A	A	A	A	A	A	A	A	A	A	A	A
C/T	Ps156116	B	B	-	A	A	A	H	H	B	B	B	H	A	A	A	A	A	B	B	A
T/G	Ps156532	B	B	H	A	A	A	A	A	B	B	B	H	A	A	A	H	B	B	B	A
A/G	Ps156554	B	B	H	A	A	A	H	B	A	A	A	H	B	B	B	H	A	B	B	A
A/G	Ps156654	B	B	H	A	A	A	H	-	B	B	B	H	A	A	A	H	B	B	B	A
A/G	Ps156695	B	B	H	A	A	A	A	A	B	B	B	H	A	A	A	H	B	B	B	A
A/G	Ps156718	B	B	H	A	A	A	A	A	B	B	B	H	A	A	A	A	A	B	B	A
C/T	Ps156784	B	B	H	A	A	A	A	A	B	B	B	H	A	A	A	A	A	B	B	A
A/G	Ps156801	B	B	H	A	A	A	A	A	A	A	A	A	-	A	A	A	-	B	B	A
A/T	Ps156815	B	B	-	A	A	A	H	B	B	B	B	H	A	A	A	H	B	B	B	A
C/T	Ps156824	B	B	H	A	A	A	H	B	B	B	B	H	A	A	A	A	A	B	B	A
T/G	Ps156867	B	B	-	A	A	A	H	B	A	A	A	H	B	-	B	B	B	B	B	A
C/G	Ps156888	B	B	H	A	A	A	H	B	B	B	B	B	B	B	B	H	A	B	B	A
C/T	Ps156925	B	B	H	A	A	A	A	-	-	A	A	H	B	B	B	H	A	A	A	A
C/T	Ps157003	B	B	H	A	A	A	A	A	B	B	B	H	A	A	A	A	A	B	B	A
C/T	Ps157031	B	B	H	A	A	A	H	B	B	B	B	H	A	A	A	A	A	B	B	A
C/T	Ps157079	B	B	-	A	A	A	A	-	B	B	B	B	B	B	B	H	A	A	A	A
A/C	Ps157116	B	B	H	A	A	A	H	B	B	B	B	H	A	A	A	A	A	B	B	A
A/G	Ps157142	B	B	H	A	A	A	H	B	B	B	B	B	B	B	B	H	A	B	B	A
T/G	Ps157160	B	B	H	A	A	A	A	A	B	B	B	H	A	A	A	A	A	B	B	A
T/G	Ps157275	B	B	H	A	A	A	A	A	A	A	A	A	A	A	A	A	A	A	A	A
C/T	Ps157405	B	B	-	A	A	A	H	B	A	A	A	H	B	B	B	H	A	A	A	B
A/T	Ps157458	B	B	H	A	A	A	H	B	B	B	B	H	A	A	A	A	A	B	B	B
C/G	Ps157591	B	B	H	A	A	A	H	B	A	A	A	H	B	B	B	H	A	B	B	A
A/G	Ps157604	B	B	H	A	A	A	H	B	B	B	B	H	A	A	A	H	B	B	B	A
A/C	Ps157610	B	B	H	A	A	A	A	A	B	B	B	H	A	A	A	A	A	A	A	A
C/T	Ps157695	B	B	H	A	A	A	A	A	B	B	B	H	A	A	A	A	A	B	B	A
A/G	Ps157867	B	B	H	A	A	A	H	B	-	-	-	A	A	A	A	H	B	B	B	A
A/T	Ps157869	B	B	H	A	A	A	A	A	A	A	A	H	B	B	B	H	A	A	A	A
C/T	Ps157939	B	B	-	A	A	A	-	-	B	B	B	H	A	A	A	H	B	B	B	A
T/G	Ps158030	B	B	H	A	A	A	H	B	B	B	B	B	B	B	B	H	A	B	B	A
C/G	Ps158073	B	B	H	A	A	A	A	-	B	B	B	B	B	B	B	H	A	B	B	A
T/G	Ps158161	B	B	-	A	A	A	H	B	A	A	A	H	B	B	B	B	B	A	A	A
A/C	Ps158219	B	B	H	A	A	A	H	B	-	-	-	B	B	B	B	H	A	-	-	A
A/C	Ps158415	B	B	H	A	A	A	H	B	B	B	B	H	A	A	A	H	B	B	B	A
C/G	Ps158486	B	B	H	A	A	A	H	B	A	A	A	H	B	B	B	H	A	B	B	A
C/T	Ps158534	B	B	H	A	A	A	H	B	B	B	B	H	A	A	A	H	B	B	B	A
A/G	Ps158543	B	B	H	A	A	A	A	A	B	B	B	B	B	B	B	B	B	B	B	A
A/G	Ps158576	B	B	H	A	A	A	A	A	B	B	B	B	B	B	B	B	B	B	B	B
A/C	Ps158588	B	B	H	A	A	A	A	-	B	B	B	H	A	A	A	A	A	B	B	A
A/T	Ps158653	B	B	H	A	A	A	H	B	A	A	A	H	B	B	B	B	B	A	A	B
A/G	Ps158806	B	B	H	A	A	A	A	A	B	B	B	B	B	B	B	B	B	B	B	B
A/G	Ps158845	B	B	H	A	A	A	H	B	B	B	B	H	A	A	A	H	B	B	B	B
A/G	Ps159076	B	B	H	A	A	A	H	B	B	B	B	B	B	B	B	B	B	B	B	A
A/G	Ps159165	B	B	-	A	A	A	H	B	B	B	B	H	A	-	A	H	B	B	B	B
T/G	Ps159177	B	B	H	A	A	A	A	H	A	A	A	A	A	A	A	A	A	B	B	A
A/C	Ps159234	B	B	H	A	A	A	A	-	B	B	B	H	A	A	A	A	A	B	B	A
A/C	Ps159262	B	B	H	A	A	A	A	A	A	A	A	A	A	A	A	A	A	A	A	A
A/G	Ps159290	B	B	H	A	A	A	A	A	B	B	B	H	A	A	A	A	A	B	B	A
A/G	Ps159299	B	B	H	A	A	A	H	B	B	B	B	B	B	B	B	H	A	B	B	A
A/T	Ps159374	B	B	H	A	A	A	A	A	B	B	B	H	A	A	A	A	A	B	B	A
T/G	Ps159379	B	B	H	A	A	A	H	B	B	B	B	B	B	B	B	H	A	B	B	A
C/T	Ps159436	B	B	H	A	A	A	A	A	B	B	B	H	A	A	A	H	B	B	B	A
A/G	Ps159442	B	B	H	A	A	A	H	B	B	B	B	H	A	A	A	A	A	B	B	A
A/G	Ps159471	B	B	H	A	A	A	H	B	A	A	A	H	B	B	B	B	-	-	-	A
T/G	Ps159509	B	B	H	A	A	A	A	A	A	A	A	A	A	A	A	A	A	B	B	A
A/T	Ps159554	B	B	H	A	A	A	A	A	-	B	B	-	A	A	A	A	A	B	B	A
C/T	Ps159586	B	B	H	A	A	A	A	A	B	B	B	H	A	A	A	H	B	B	B	A
C/T	Ps159611	B	B	H	A	A	A	H	-	B	B	B	H	A	A	A	A	A	B	B	A
T/G	Ps159616	B	B	H	A	A	A	A	-	B	B	B	H	A	A	A	A	A	B	B	A
A/G	Ps159717	B	B	H	A	A	A	H	-	B	B	B	H	A	A	A	A	A	B	B	A
A/T	Ps159755	B	B	H	A	A	A	A	A	B	B	B	A	A	A	A	A	A	A	A	A
T/G	Ps159815	B	B	H	A	A	A	H	B	A	A	A	H	B	B	B	H	A	B	B	A
A/G	Ps159911	B	B	H	A	A	A	A	A	A	A	A	H	B	B	B	B	B	B	B	A
A/G	Ps159966	B	B	H	A	A	A	H	B	B	B	B	H	A	A	A	H	B	B	B	A
C/T	Ps160000	B	B	H	A	A	A	A	A	B	B	B	B	A	A	A	B	B	B	B	A
T/G	Ps160120	B	B	H	A	A	A	H	B	B	B	B	H	A	A	A	A	A	B	B	A
C/G	Ps160133	B	B	H	A	A	A	H	B	B	B	B	B	B	B	B	B	B	B	B	H
A/G	Ps160242	B	B	H	A	A	A	A	A	B	B	B	H	A	A	A	A	A	B	B	A
C/T	Ps160276	B	B	H	A	A	A	A	A	B	B	B	H	A	A	A	A	A	B	B	A
A/C	Ps160304	B	B	H	A	A	A	H	B	B	B	B	B	B	B	B	H	A	B	B	A
C/T	Ps160323	B	B	H	A	A	A	A	A	B	B	B	H	A	A	A	H	B	B	B	A
A/T	Ps160336	B	B	H	A	A	A	A	A	B	B	B	H	A	A	A	H	B	B	B	A
A/T	Ps160375	B	B	H	A	A	A	A	A	-	B	-	H	A	A	A	A	A	B	B	A
C/T	Ps160394	B	B	H	A	A	A	H	B	A	A	A	H	B	B	B	H	A	-	-	A
A/G	Ps160396	B	B	H	A	A	A	A	A	B	B	B	B	B	B	B	B	B	B	B	A
A/G	Ps160638	B	B	H	A	A	A	-	H	B	B	B	H	A	A	A	H	B	B	B	A
A/C	Ps160698	B	B	H	A	A	A	H	B	B	B	B	H	A	A	A	A	A	B	B	A
A/G	Ps160794	B	B	H	A	A	A	A	A	B	B	B	B	B	B	B	H	A	B	B	A
A/G	Ps160826	B	B	-	A	A	A	A	A	B	B	B	H	A	A	A	A	A	B	B	A
C/G	Ps160828	B	B	H	A	A	A	H	B	A	A	A	H	B	B	B	H	A	B	B	A
C/T	Ps160871	B	B	H	A	A	A	H	B	B	B	B	B	B	B	B	H	A	B	B	A
C/T	Ps160937	B	B	H	A	A	A	A	A	B	B	B	-	A	A	A	A	A	A	A	A
A/G	Ps161004	B	B	H	A	A	A	A	A	A	A	A	A	A	A	A	A	A	B	B	A
A/G	Ps161067	B	B	H	A	A	A	H	B	A	A	A	A	A	A	A	A	A	A	A	A
C/T	Ps161253	B	B	H	A	A	A	-	B	B	B	B	-	A	A	A	-	B	A	A	B
C/T	Ps161427	B	B	H	A	A	A	-	A	B	B	B	H	A	A	A	H	B	B	B	A
A/G	Ps161430	B	B	H	A	A	A	H	-	B	B	B	B	B	B	B	H	A	B	B	A
A/G	Ps161603	B	B	H	A	A	A	A	A	B	B	B	H	A	A	A	A	A	B	B	A
A/T	Ps161741	B	B	H	A	A	A	H	-	B	B	B	H	A	A	A	A	A	B	B	A
A/G	Ps161791	B	B	H	A	A	A	H	B	B	B	B	H	A	A	A	A	A	B	B	B
C/T	Ps161823	B	B	H	A	A	A	A	A	B	B	B	H	A	A	A	A	A	B	B	A
A/G	Ps161850	B	B	H	A	A	A	A	A	A	A	A	A	A	A	A	A	A	A	A	A
T/G	Ps161907	B	B	H	A	A	A	H	B	A	A	A	H	B	B	B	H	A	A	A	A
A/C	Ps161930	B	B	H	A	A	A	A	A	B	B	B	H	A	A	A	A	A	B	B	A
A/C	Ps161998	-	-	A	A	A	A	A	A	A	A	A	A	A	A	A	A	A	A	A	A
T/G	Ps162068	B	B	-	A	A	A	-	A	B	B	B	H	A	A	A	H	B	B	B	A
C/T	Ps162096	B	B	H	A	A	A	A	A	B	B	B	B	B	B	B	B	B	B	B	B
C/T	Ps162128	B	B	H	A	-	A	A	A	A	A	A	A	A	A	A	H	B	A	A	A
A/C	Ps162143	B	B	H	A	A	A	H	B	B	B	B	H	A	A	A	A	A	B	B	A
A/G	Ps162145	B	B	H	A	A	A	H	B	B	B	B	B	B	B	B	H	A	B	B	A
A/G	Ps162220	B	B	H	A	A	A	A	-	B	B	B	H	A	A	A	H	B	B	B	A
C/T	Ps162403	B	B	H	A	A	A	H	B	B	B	B	B	B	B	B	H	A	B	B	A
A/G	Ps162581	B	B	H	A	A	A	A	A	B	B	B	H	A	A	A	H	B	B	B	A
C/T	Ps162701	B	B	H	A	A	A	A	A	A	A	A	A	A	A	A	A	A	A	A	A
A/G	Ps162715	B	B	H	A	A	A	A	A	B	B	B	H	A	A	A	A	A	B	B	A
T/G	Ps162717	B	B	H	A	A	A	A	A	A	A	A	A	A	A	A	A	A	A	A	A
A/T	Ps162729	B	B	H	A	A	A	H	B	B	B	B	-	A	A	A	H	B	B	B	A
C/T	Ps162811	B	B	H	A	A	A	A	A	A	A	A	A	A	A	A	A	A	A	A	A
C/T	Ps162957	B	B	H	A	A	A	-	A	A	A	A	H	B	B	B	H	A	B	B	A
A/G	Ps162975	B	B	H	A	A	A	H	B	B	B	B	B	B	B	B	H	A	B	B	A
C/T	Ps163077	B	B	H	A	A	A	A	A	B	B	B	H	A	A	A	H	B	B	B	A
A/C	Ps163158	B	B	H	A	A	A	-	-	B	B	B	B	B	B	B	H	A	B	B	A
A/G	Ps163222	B	B	H	A	A	A	H	B	A	A	A	A	A	A	A	A	A	A	A	A
A/G	Ps163228	B	B	H	A	A	A	H	B	A	A	A	A	-	-	-	-	-	A	A	B
T/G	Ps163356	B	B	H	A	A	A	-	B	B	B	B	B	B	B	B	B	B	B	B	A
A/G	Ps163428	B	B	H	A	A	A	H	B	B	B	B	B	B	B	B	B	B	B	B	B
C/T	Ps163454	B	B	H	A	A	A	H	B	A	A	A	H	B	B	B	B	B	A	A	A
C/T	Ps163472	B	B	H	A	A	A	H	B	B	B	B	B	B	B	B	H	A	B	B	A
T/G	Ps163489	B	B	H	A	A	A	H	B	B	B	B	H	A	A	A	A	A	B	B	A
C/T	Ps163590	B	B	-	A	A	A	A	A	A	A	A	A	A	A	A	A	A	B	B	A
A/G	Ps163651	B	B	H	A	A	A	H	B	A	A	A	H	B	B	B	H	A	B	B	A
A/G	Ps163695	B	B	H	A	A	A	A	A	B	B	B	A	A	A	A	A	A	A	A	A
A/G	Ps163697	B	B	H	A	A	A	H	B	A	A	A	A	A	A	A	A	A	B	B	A
A/G	Ps163814	B	B	H	A	A	A	-	-	B	B	B	B	B	B	B	H	A	B	B	A
